# Supplementary material for: Selective synthesis of enol ethers via nickel-catalyzed cross coupling of α-oxy-vinylsulfones with alkylzinc reagents
Source: Royal Society of Chemistry journal article supplement (doi:10.1039/d1cc05347g), 2021-01-01
Supplement: d1cc05347g1.pdf [file d1cc05347g1.pdf]

## Supporting Information

Selective Synthesis of Enol Ethers by Nickel-Catalyzed Cross

Coupling of  $\alpha$ -oxy-Vinylsulfones with Alkylzinc Reagents

Liang Gong,<sup>‡</sup> Qian Zhang,<sup>‡</sup> Demeng Xie,<sup>‡</sup> Wei Zhang, Shi-Yang Xu, Xia Zhang,<sup>\*</sup>  
and Dawen Niu<sup>\*</sup>

### Table of Contents

|                                                                                      |    |
|--------------------------------------------------------------------------------------|----|
| 1. General Information.....                                                          | 2  |
| 2. General Procedure for the Ni-Catalyzed Cross-Coupling Reaction .....              | 3  |
| 3. Condition Optimization .....                                                      | 4  |
| 4. General Procedures for the Synthesis of Alkylzinc Reagents.....                   | 5  |
| 5. General Procedures for the Synthesis of Acyclic $\alpha$ -Oxy Vinylsulfones ..... | 6  |
| 6. Characterization Data for Products in Table 2 .....                               | 16 |
| 7. Characterization Data for Products in Table 3 .....                               | 21 |
| 8. The <i>E/Z</i> Ratios of the Products in Table 2 and 3.....                       | 25 |
| 9. References.....                                                                   | 36 |
| 10. NMR Spectra .....                                                                | 37 |

## 1. General Information

Flash column chromatography was performed using silica gel (300-400 mesh) purchased from Qindao Haiyang. Ni(OAc)<sub>2</sub>, 5-Me-bpy, DMA and THF were purchased from Energy Chemical and used as received. Unless otherwise noted, all reported yields of the reactions are isolated yields of purified products. NMR yields were determined by using 1,3,5-trimethoxybenzene as an internal standard. All new compounds were characterized by NMR spectroscopy, IR spectroscopy, high-resolution mass spectroscopy (HR-MS), and melting point (if solids). NMR spectra were recorded on a Bruker AMX 400 spectrometer and were calibrated using TMS (0.00 ppm) or residual deuterated solvent as an internal reference (CDCl<sub>3</sub>: 7.26 ppm for <sup>1</sup>H NMR and 77.16 ppm for <sup>13</sup>C NMR), and the tabulated data were reported in ppm. IR spectra were taken on Thermo Scientific Nicolet iS5 spectrometer (iD5 ATR, diamond). HR-MS spectra were recorded on a Waters Q-TOF Premier. Melting points (m.p.) were recorded on an INESA SGW X-4 melting point apparatus.

## 2. General Procedure for the Ni-Catalyzed Cross-Coupling Reaction

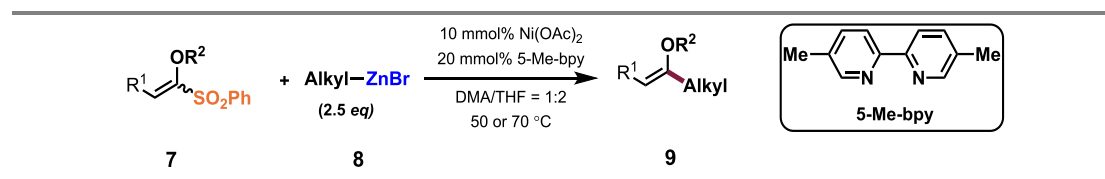

Vinylsulfone **7** were weighed into a Schlenk tube containing a magnetic stir bar. The Schlenk tube was loosely capped and transferred into a nitrogen-filled glovebox. To the Schlenk tube was sequentially added Ni(OAc)<sub>2</sub>, 5-Me-bpy, and solvent (THF 0.1-0.2 M). The reaction mixture was stirred at glovebox for 1 min, and then added alkylzinc Reagents **8**. The Schlenk tube was screw capped and put into a preheated oil bath (50 or 70 °C). After stirring for 8 h, the reaction mixture was cooled to room temperature. The reaction mixture was diluted with EtOAc and filtered with a pad of cellite. The filtrate was washed with brine. The organic layer was dried over Na<sub>2</sub>SO<sub>4</sub>, filtered and concentrated. Then 1,3,5-trimethoxybenzene was added into the residue as internal standard and confirmed the *E/Z* ratios and NMR yield of the products in table **2** and **3** by analysis of the <sup>1</sup>H NMR spectra of the crude mixture. The crude mixture was purified with silica gel chromatography to give the pure product **9**.

### 3. Condition Optimization

Table S1. Other Representative Conditions Not Listed in Table 1

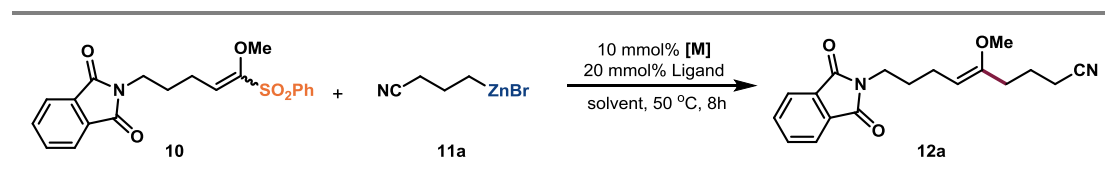

| entry | [M]                                                | Ligand   | Solvent            | conversion of 10 | yield of 12a | Z:E   |
|-------|----------------------------------------------------|----------|--------------------|------------------|--------------|-------|
| 1     | Fe(OTf) <sub>3</sub>                               | Xantphos | THF                | trace            | 0%           | N.D.  |
| 2     | FeCl <sub>2</sub>                                  | Xantphos | THF                | trace            | 0%           | N.D.  |
| 3     | PdCl <sub>2</sub>                                  | Xantphos | THF                | 12%              | 0%           | N.D.  |
| 4     | Pd(OAc) <sub>2</sub>                               | Xantphos | THF                | 15%              | 0%           | N.D.  |
| 5     | Pd(PPh <sub>3</sub> ) <sub>4</sub>                 | Xantphos | THF                | 8%               | 0%           | N.D.  |
| 6     | Pd(PPh <sub>3</sub> ) <sub>4</sub>                 | N/A      | THF                | 20%              | 0%           | N.D.  |
| 7     | Ni(PCy <sub>3</sub> ) <sub>2</sub> Cl <sub>2</sub> | N/A      | THF                | 89%              | 25%          | 1:1   |
| 8     | Ni(PPh <sub>3</sub> ) <sub>2</sub> Cl <sub>2</sub> | N/A      | THF                | 93%              | 11%          | 1:1   |
| 9     | Ni(OAc) <sub>2</sub>                               | L1       | THF                | 92%              | 53%          | 5:1   |
| 10    | Ni(OAc) <sub>2</sub>                               | L2       | THF                | >95%             | 68%          | >19:1 |
| 11    | Ni(OAc) <sub>2</sub>                               | L3       | THF                | 64%              | 24%          | 10:1  |
| 12    | Ni(OAc) <sub>2</sub>                               | L4       | THF                | 70%              | 31%          | 4:1   |
| 13    | Ni(OAc) <sub>2</sub>                               | L5       | THF                | 46%              | 5%           | N.D.  |
| 14    | Ni(OAc) <sub>2</sub>                               | L6       | THF                | 68%              | 49%          | 1:1   |
| 15    | Ni(OAc) <sub>2</sub>                               | L7       | THF                | 72%              | 5%           | N.D.  |
| 16    | Ni(OAc) <sub>2</sub>                               | L8       | THF                | 86%              | 4%           | N.D.  |
| 17    | Ni(cod) <sub>2</sub>                               | L2       | THF                | >95%             | 61%          | 9:1   |
| 18    | Ni(acac) <sub>2</sub>                              | L2       | THF                | >95%             | 39%          | >19:1 |
| 19    | NiCl <sub>2</sub>                                  | L2       | THF                | 46%              | trace        | N.D.  |
| 20    | NiBr <sub>2</sub>                                  | L2       | THF                | 68%              | 30%          | 10:1  |
| 21    | Ni(OTf) <sub>2</sub>                               | L2       | THF                | 36%              | trace        | N.D.  |
| 22    | Ni(OAc) <sub>2</sub>                               | L2       | DCM                | 35%              | trace        | N.D.  |
| 23    | Ni(OAc) <sub>2</sub>                               | L2       | DCE                | 90%              | 55%          | 10:1  |
| 24    | Ni(OAc) <sub>2</sub>                               | L2       | CH <sub>3</sub> CN | >95%             | 53%          | 9:1   |
| 25    | Ni(OAc) <sub>2</sub>                               | L2       | toluene            | >95%             | 63%          | 9:1   |
| 26    | Ni(OAc) <sub>2</sub>                               | L2       | Dioxane            | >95%             | 57%          | 12:1  |
| 27    | Ni(OAc) <sub>2</sub>                               | L2       | EtOAc              | >95%             | 60%          | 16:1  |

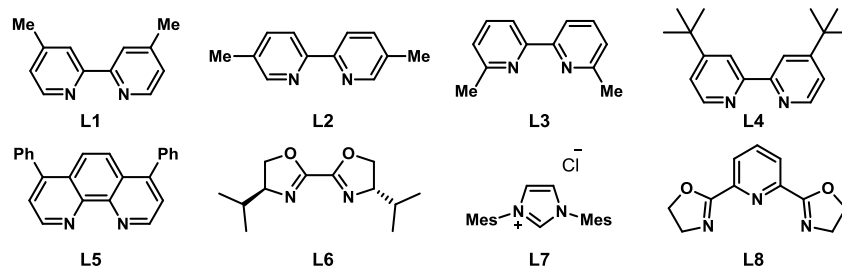

## 4. General Procedures for the Synthesis of Alkylzinc Reagents

### 4.1 Preparation of Alkylzinc Reagents<sup>1</sup>

A 25 mL of Schlenk tube was charged with zinc powder (295.0 mg, 4.5 mmol) and heated to 80 °C under vacuum for 30 min. After the tube was back-filled with argon and cooled to room temperature, iodine (38.0 mg, 0.15 mmol) and DMA (3.0 mL) were added. The resulting mixture was stirred until the brown color disappeared, then alkylbromide (3.0 mmol) was added. The reaction mixture was heated to 80 °C. After stirring for 10 h at 80 °C, the mixture was cooled to room temperature. The gray solution was filtered under an inert atmosphere by injection through a syringe filter and the filtrate was stored under argon in a Schlenk tube, the solution of the alkylzinc reagent was titrated with I<sub>2</sub> according to Knochel's method<sup>2</sup>. This alkylzinc solution can be stored at room temperature under argon for several weeks without deterioration.

### 4.2 Preparation of Starting Materials

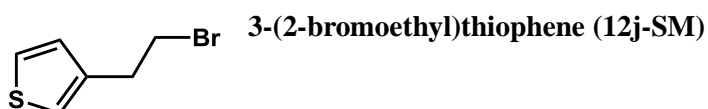

The title compound was prepared according to literature procedure<sup>3</sup> from 2-(thiophen-3-yl)ethan-1-ol (10 mmol, 1.12 mL), affording 3-(2-bromoethyl)thiophene as a colorless liquid (1.24 g, 6.5 mmol, 65%). The analytical data is in full consistency with the data reported in the literature.

<sup>1</sup>H NMR (400 MHz, CDCl<sub>3</sub>) δ 7.29 (dd, *J* = 4.8, 3.2 Hz, 1H), 7.10 – 7.05 (m, 1H), 6.98 (d, *J* = 4.8 Hz, 1H), 3.57 (t, *J* = 7.6 Hz, 2H), 3.21 (t, *J* = 7.6 Hz, 2H).

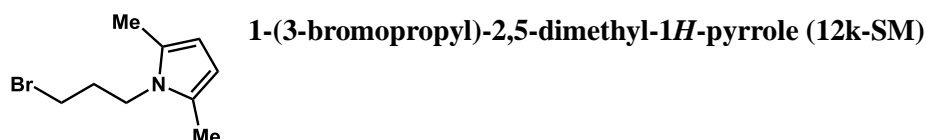

The title compound was prepared according to literature<sup>4</sup> procedure from 3 bromopropylammonium bromide (1.75 g, 8.0 mmol) affording 1-(3-bromopropyl)-2,5-dimethyl-1H-pyrrole as a colorless oil (1.27 g, 5.9 mmol, 73%). The analytical data is in full consistency with the data reported in the literature.

<sup>1</sup>H NMR (400 MHz, CDCl<sub>3</sub>) δ 5.77 (s, 2H), 3.89 (t, *J* = 7.2 Hz, 2H), 3.40 (t, *J* = 6.3 Hz, 2H), 2.23 (s, 6H), 2.17 (dt, *J* = 13.2, 6.4 Hz, 2H).

## 5. General Procedures for the Synthesis of Acyclic $\alpha$ -Oxy Vinylsulfones

### 5.1 Preparation of $\alpha$ -Methoxy Vinylsulfones

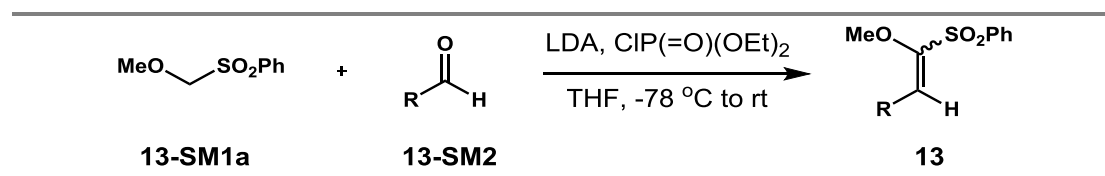

The acyclic  $\alpha$ -methoxy vinylsulfones were prepared according to literature procedures with slight modification.<sup>5</sup>

To a THF solution (15 mL) of [(methoxymethyl)sulfonyl]benzene<sup>6</sup> (**13-SM1a**, 3.3 mmol, 1.1 equiv) cooled at  $-78\text{ }^\circ\text{C}$  was added LDA (9.0 mmol, 3.0 equiv, 2.0 M in THF) dropwise under nitrogen atmosphere. After 15 min, diethyl chlorophosphate (4.5 mmol, 1.5 equiv) was added dropwise over 10 min. The reaction mixture was stirred for 1 h, and a solution of aldehyde (**13-SM2** 3.0 mmol, 1.0 equiv) in THF (5 mL) was added over 5 min. The reaction was allowed to warm to room temperature and stirred overnight. Before being quenched with saturated aqueous  $\text{NH}_4\text{Cl}$  at  $0\text{ }^\circ\text{C}$ . The mixture was extracted with ethyl acetate, and the combined organic layers were dried and concentrated in vacuo. The resulting residue was purified by flash chromatography to give **13** as a separable mixture of *E/Z* isomers.

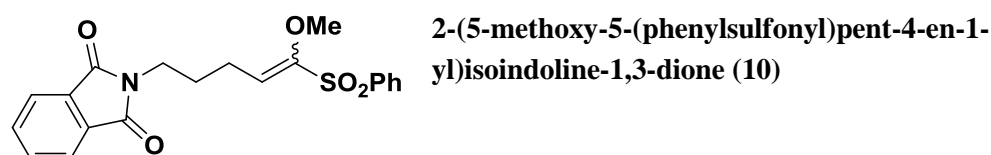

Following **General Procedure**, 4-(1,3-dioxoisoindolin-2-yl)butanal **13-SM2a** (5.0 mmol, 1.086 g) and [(methoxymethyl)sulfonyl]benzene (**13-SM1a**, 5.5 mmol) were used. Compound **10** was isolated by silica gel chromatography ( $\text{SiO}_2$ , petroleum ether/ethyl acetate = 6/1) as a white solid (*E/Z* = 1:0.8, 1.4 g, 72% yield).

**HRMS (DART-TOF)** calculated for  $\text{C}_{20}\text{H}_{19}\text{NNaO}_5\text{S}^+$  [ $\text{M}+\text{Na}$ ]<sup>+</sup> *m/z* 408.0876, found 408.0881.

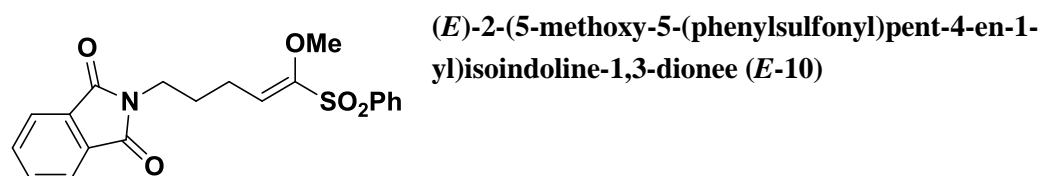

**$^1\text{H}$  NMR (400 MHz,  $\text{CDCl}_3$ )**  $\delta$  7.90 (d,  $J = 7.6$  Hz, 2H), 7.84 (dd,  $J = 5.2, 3.2$  Hz, 2H), 7.72 (dd,  $J = 5.6, 3.2$  Hz, 2H), 7.62 (t,  $J = 7.6$  Hz, 1H), 7.53 (t,  $J = 7.6$  Hz, 2H), 6.45 (t,  $J = 7.6$  Hz, 1H), 3.82 (s, 3H), 3.70 (t,  $J = 7.2$  Hz, 2H), 2.28 (dd,  $J = 15.6, 7.6$  Hz, 2H), 1.84 (dt,  $J = 14.8, 7.6$  Hz, 2H).  **$^{13}\text{C}$  NMR (101 MHz,  $\text{CDCl}_3$ )**  $\delta$  168.4, 154.4, 139.1, 134.2, 133.7, 132.2, 129.2, 128.4, 125.5, 123.4, 63.3, 37.5, 27.7, 23.3. **IR (thin film,  $\text{cm}^{-1}$ ):** 2975, 2942, 1771, 1710, 1445, 1397, 1371, 1319, 1159, 1139, 1029, 956, 721, 648, 593 and 542  $\text{cm}^{-1}$ . **m.p.:** 108.5–111.5  $^\circ\text{C}$

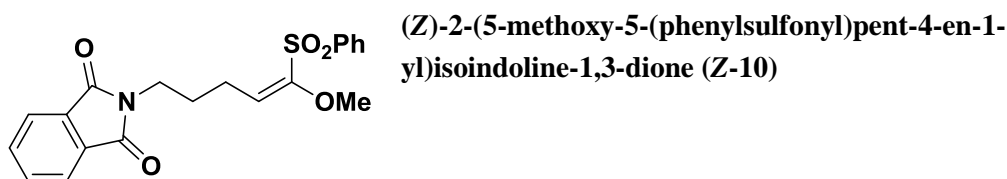

<sup>1</sup>H NMR (400 MHz, CDCl<sub>3</sub>) δ 7.92 (d, *J* = 7.2 Hz, 2H), 7.84 (dd, *J* = 5.6, 3.2 Hz, 2H), 7.71 (dd, *J* = 5.6, 3.2 Hz, 2H), 7.62 (t, *J* = 7.6 Hz, 1H), 7.53 (t, *J* = 7.6 Hz, 2H), 5.32 (t, *J* = 8.0 Hz, 1H), 3.75 (t, *J* = 7.2 Hz, 2H), 3.59 (s, 3H), 2.74 (dd, *J* = 15.2, 7.6 Hz, 2H), 1.94 – 1.81 (m, 2H). <sup>13</sup>C NMR (101 MHz, CDCl<sub>3</sub>) δ 168.5, 153.4, 139.8, 134.0, 133.7, 132.2, 129.1, 128.2, 123.3, 112.8, 58.4, 37.3, 29.1, 22.6. IR (thin film, cm<sup>-1</sup>): 2936, 2853, 1770, 1710, 1446, 1397, 1322, 1275, 1145, 1085, 750, 690 and 608 cm<sup>-1</sup>. m.p.: 95.2–98.2 °C

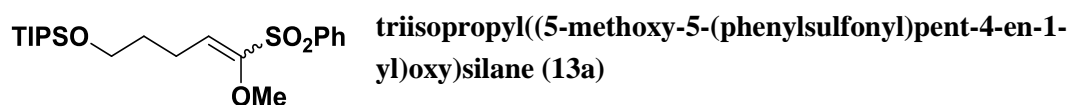

Following **General Procedure**, 4-((triisopropylsilyl)oxy)butanal<sup>7</sup> **13-SM2b** (3.0 mmol, 733 mg) and [(methoxymethyl)sulfonyl]benzene **13-SM1a** (3.3 mmol) were used. Compound **13a** was isolated by silica gel chromatography (SiO<sub>2</sub>, petroleum ether/ethyl acetate = 10/1) as a yellow oil (*E/Z* = 0.8:1, 453 mg, 37% yield).

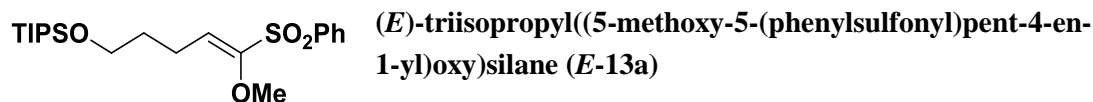

<sup>1</sup>H NMR (400 MHz, CDCl<sub>3</sub>) δ 7.91 (d, *J* = 7.2 Hz, 2H), 7.69 – 7.57 (m, 1H), 7.52 (t, *J* = 7.6 Hz, 2H), 6.47 (t, *J* = 7.6 Hz, 1H), 3.82 (s, 3H), 3.70 (t, *J* = 6.0 Hz, 2H), 2.34 (dd, *J* = 15.2, 7.6 Hz, 2H), 1.71 – 1.65 (m, 2H), 1.12 – 1.07 (m, 3H), 1.06 – 1.02 (m, 18H). <sup>13</sup>C NMR (101 MHz, CDCl<sub>3</sub>) δ 153.9, 139.2, 133.5, 129.1, 128.3, 126.9, 63.2, 62.4, 31.9, 22.4, 18.1, 12.0. IR (thin film, cm<sup>-1</sup>): 2942, 2865, 1650, 1463, 1319, 1276, 1158, 1066, 883, 750, 686 and 594 cm<sup>-1</sup>. HRMS (DART-TOF) calculated for C<sub>21</sub>H<sub>36</sub>NaO<sub>4</sub>SSi<sup>+</sup> [M+Na]<sup>+</sup> m/z 435.1996, found 435.2001.

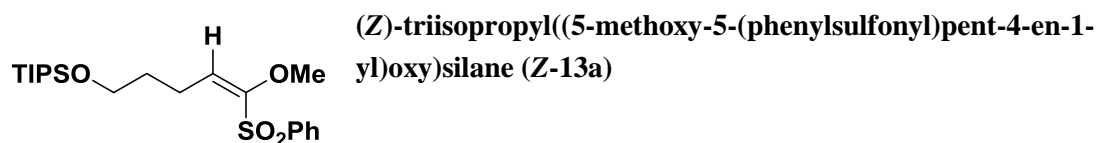

<sup>1</sup>H NMR (400 MHz, CDCl<sub>3</sub>) δ 7.93 (d, *J* = 7.2 Hz, 2H), 7.62 (t, *J* = 7.6 Hz, 1H), 7.52 (t, *J* = 7.6 Hz, 2H), 5.35 (t, *J* = 8.0 Hz, 1H), 3.75 (t, *J* = 6.4 Hz, 2H), 3.58 (s, 3H), 2.76 (dd, *J* = 15.2, 7.6 Hz, 2H), 1.71 (dd, *J* = 14.4, 6.8 Hz, 2H), 1.12 – 1.07 (m, 3H), 1.07 – 1.04 (m, 18H). <sup>13</sup>C NMR (101 MHz, CDCl<sub>3</sub>) δ 152.7, 140.1, 133.6, 129.0, 128.2, 115.3, 62.9, 58.6, 33.5, 22.1, 18.1, 12.1. IR (thin film, cm<sup>-1</sup>): 2943, 2870, 1727, 1447, 1306, 1151, 1124, 995, 758, 730, 689 and 610 cm<sup>-1</sup>. HRMS (DART-TOF) calculated for C<sub>21</sub>H<sub>36</sub>NaO<sub>4</sub>SSi<sup>+</sup> [M+Na]<sup>+</sup> m/z 435.1996, found 435.1997.

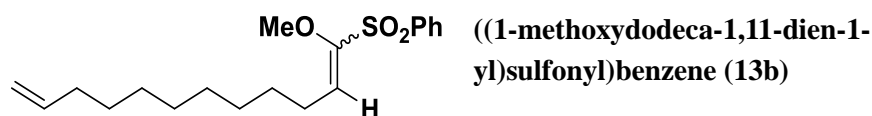

Following **General Procedure**, 10-undecenal **13-SM2c** (3.0 mmol, 601  $\mu$ L) and [(methoxymethyl)sulfonyl]benzene **13-SM1a** (3.3 mmol) were used. Compound **13b** was isolated by silica gel chromatography ( $\text{SiO}_2$ , petroleum ether/ethyl acetate = 10/1) as a light yellow oil ( $E/Z$  = 1:0.92, 790 mg, 78% yield).

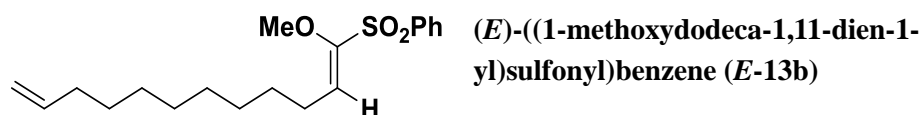

$^1\text{H NMR}$  (400 MHz,  $\text{CDCl}_3$ )  $\delta$  7.83 (d,  $J$  = 7.6 Hz, 2H), 7.53 (t,  $J$  = 7.6 Hz, 1H), 7.44 (t,  $J$  = 7.6 Hz, 2H), 6.36 (t,  $J$  = 7.6 Hz, 1H), 5.77 – 5.67 (m, 1H), 4.91 (dd,  $J$  = 17.2, 1.4 Hz, 1H), 4.85 (d,  $J$  = 10.2 Hz, 1H), 3.73 (s, 3H), 2.13 (q,  $J$  = 7.6 Hz, 2H), 1.95 (q,  $J$  = 14.0, 7.0 Hz, 2H), 1.41 – 1.33 (m, 2H), 1.30 – 1.27 (m, 2H), 1.25 – 1.15 (m, 8H).  $^{13}\text{C NMR}$  (101 MHz,  $\text{CDCl}_3$ )  $\delta$  153.7, 139.3, 139.2, 133.5, 129.1, 128.3, 127.3, 114.2, 63.2, 33.8, 29.4, 29.3, 29.3, 29.1, 28.9, 28.5, 25.7. **IR** (thin film,  $\text{cm}^{-1}$ ): 3070, 2925, 2854, 1644, 1447, 1319, 1154, 1068, 909, 756, 688, 594 and 548  $\text{cm}^{-1}$ . **HRMS** (DART-TOF) calculated for  $\text{C}_{19}\text{H}_{28}\text{NaO}_3\text{S}^+$   $[\text{M}+\text{Na}]^+$   $m/z$  359.1651, found 359.1655.

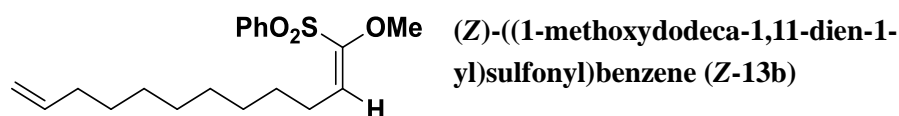

$^1\text{H NMR}$  (400 MHz,  $\text{CDCl}_3$ )  $\delta$  7.93 (d,  $J$  = 7.2 Hz, 2H), 7.62 (t,  $J$  = 7.6 Hz, 1H), 7.53 (t,  $J$  = 7.6 Hz, 2H), 5.86-5.76 (m, 1H), 5.28 (t,  $J$  = 8.0 Hz, 1H), 4.99 (d,  $J$  = 16.0, 1H), 4.93 (d,  $J$  = 8.0, 1H), 3.58 (s, 3H), 2.67 (dd,  $J$  = 15.2, 7.8 Hz, 2H), 2.04 (dd,  $J$  = 14.4, 6.8 Hz, 2H), 1.49 – 1.41 (m, 2H), 1.40 – 1.35 (m, 2H), 1.34 – 1.26 (m, 8H). **IR** (thin film,  $\text{cm}^{-1}$ ): 3071, 2926, 2855, 1730, 1639, 1447, 1307, 1187, 1145, 1085, 732, 688 and 591  $\text{cm}^{-1}$ .  $^{13}\text{C NMR}$  (101 MHz,  $\text{CDCl}_3$ )  $\delta$  152.6, 140.1, 139.3, 133.6, 129.0, 128.2, 115.9, 114.2, 58.7, 33.9, 30.3, 29.5, 29.5, 29.3, 29.2, 29.0, 25.3. **HRMS** (DART-TOF) calculated for  $\text{C}_{19}\text{H}_{28}\text{NaO}_3\text{S}^+$   $[\text{M}+\text{Na}]^+$   $m/z$  359.1651, found 359.1659.

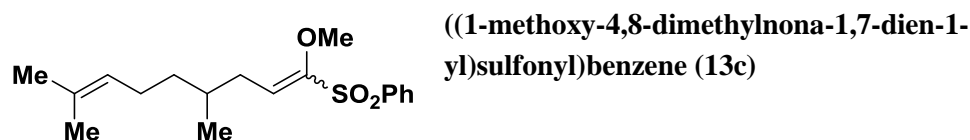

Following **General Procedure**, citronellal **13-SM2d** (3.0 mmol, 540  $\mu$ L) and [(methoxymethyl)sulfonyl]benzene **13-SM1a** (3.3 mmol) were used. Compound **13c** was isolated by silica gel chromatography ( $\text{SiO}_2$ , petroleum ether/ethyl acetate = 10/1) as a yellow oil ( $E/Z$  = 1:0.61, 532 mg, 74% yield).



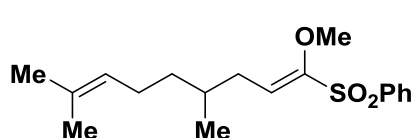

**(E)-((1-methoxy-4,8-dimethylnona-1,7-dien-1-yl)sulfonyl)benzene (E-13c)**

**<sup>1</sup>H NMR (400 MHz, CDCl<sub>3</sub>)** δ 7.90 (d, *J* = 7.2 Hz, 2H), 7.61 (t, *J* = 7.6 Hz, 1H), 7.52 (t, *J* = 7.6 Hz, 2H), 6.46 (t, *J* = 7.6 Hz, 1H), 5.04 (t, *J* = 7.2 Hz, 1H), 3.81 (s, 3H), 2.25 – 2.18 (m, 1H), 2.13 – 2.03 (m, 1H), 2.03 – 1.89 (m, 2H), 1.67 (s, 3H), 1.66 – 1.59 (m, 1H), 1.58 (s, 3H), 1.39 – 1.27 (m, 1H), 1.25 – 1.13 (m, 1H), 0.90 (d, *J* = 6.8 Hz, 3H). **<sup>13</sup>C NMR (101 MHz, CDCl<sub>3</sub>)** δ 154.1, 139.3, 133.5, 131.6, 129.1, 128.3, 126.3, 124.3, 63.1, 36.8, 32.7, 32.5, 25.8, 25.5, 19.7, 17.7. **IR (thin film, cm<sup>-1</sup>):** 2969, 2917, 2850, 1649, 1307, 1156, 1067, 751, 688, 595 and 546 cm<sup>-1</sup>. **HRMS (DART-TOF)** calculated for C<sub>18</sub>H<sub>26</sub>NaO<sub>3</sub>S<sup>+</sup> [M+Na]<sup>+</sup> m/z 345.1495, found 345.1500.

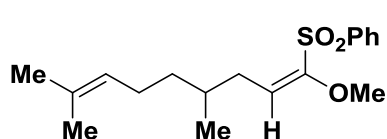

**(Z)-((1-methoxy-4,8-dimethylnona-1,7-dien-1-yl)sulfonyl)benzene (Z-13c)**

**<sup>1</sup>H NMR (400 MHz, CDCl<sub>3</sub>)** δ 7.93 (d, *J* = 7.2 Hz, 2H), 7.62 (t, *J* = 7.6 Hz, 1H), 7.53 (t, *J* = 7.6 Hz, 2H), 5.30 (t, *J* = 8.0 Hz, 1H), 5.09 (t, *J* = 7.2 Hz, 1H), 3.60 (s, 3H), 2.71 – 2.64 (m, 1H), 2.63 – 2.53 (m, 1H), 2.10 – 1.90 (m, 2H), 1.69 (s, 3H), 1.60 (s, 3H), 1.59 – 1.51 (m, 1H), 1.47 – 1.32 (m, 1H), 1.29 – 1.16 (m, 1H), 0.93 (d, *J* = 6.8 Hz, 3H). **<sup>13</sup>C NMR (101 MHz, CDCl<sub>3</sub>)** δ 153.0, 140.1, 133.6, 131.5, 129.0, 128.2, 124.6, 114.9, 58.8, 36.7, 33.7, 32.2, 25.8, 25.7, 19.4, 17.8. **IR (thin film, cm<sup>-1</sup>):** 2975, 2952, 2850, 1707, 1447, 1322, 1307, 1275, 1259, 1143, 1084, 974, 763, 750, and 688 cm<sup>-1</sup>. **HRMS (DART-TOF)** calculated for C<sub>18</sub>H<sub>26</sub>NaO<sub>3</sub>S<sup>+</sup> [M+Na]<sup>+</sup> m/z 345.1495, found 345.1498.

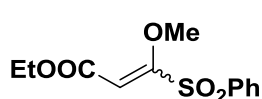

**ethyl 3-methoxy-3-(phenylsulfonyl)acrylate (13d)**

Following **General Procedure**, ethyl glyoxalate **13-SM2e** (6.0 mmol, 595 uL) and [(methoxymethyl)sulfonyl]benzene **13-SM1a** (4.0 mmol) were used. Compound **13d** was isolated by silica gel chromatography (SiO<sub>2</sub>, petroleum ether/ethyl acetate = 10/1) as a yellow oil (*E/Z* = 0.64:1, 433 mg, 40% yield).

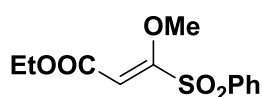

**ethyl (E)-3-methoxy-3-(phenylsulfonyl)acrylate (E-13d)**

**<sup>1</sup>H NMR (400 MHz, CDCl<sub>3</sub>)** δ 7.94 (d, *J* = 8.0 Hz, 2H), 7.68 (t, *J* = 7.6 Hz, 1H), 7.57 (t, *J* = 7.6 Hz, 2H), 6.54 (s, 1H), 4.22 (q, *J* = 7.2 Hz, 2H), 4.00 (s, 3H), 1.30 (t, *J* = 7.2 Hz, 3H). **<sup>13</sup>C NMR (101 MHz, CDCl<sub>3</sub>)** δ 164.5, 163.2, 137.3, 134.5, 129.4, 129.2, 107.2, 64.6, 61.5, 14.2. **IR (thin film, cm<sup>-1</sup>):** 3067, 2984, 2946, 2843, 1719, 1641, 1447, 1322, 1190, 1158, 1107, 1074, 1027, 977, 877, 759, 734, 688, 581 and 537 cm<sup>-1</sup>. **HRMS (DART-TOF)** calculated for C<sub>12</sub>H<sub>14</sub>NaO<sub>5</sub>S<sup>+</sup> [M+Na]<sup>+</sup> m/z 293.0454, found 293.0460.

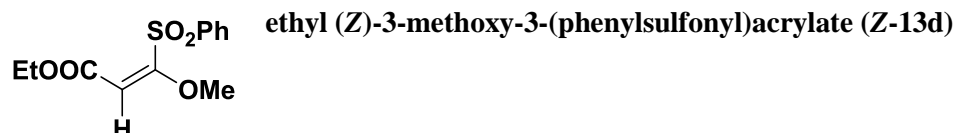

**<sup>1</sup>H NMR (400 MHz, CDCl<sub>3</sub>)** δ 8.03 (d, *J* = 7.2 Hz, 2H), 7.67 (t, *J* = 7.6 Hz, 1H), 7.56 (t, *J* = 7.6 Hz, 2H), 5.52 (s, 1H), 4.32 (q, *J* = 7.2 Hz, 2H), 3.64 (s, 3H), 1.37 (t, *J* = 7.2 Hz, 3H). **<sup>13</sup>C NMR (101 MHz, CDCl<sub>3</sub>)** δ 164.4, 159.9, 138.1, 134.3, 129.2, 129.2, 100.5, 62.0, 58.0, 14.1. **IR (thin film, cm<sup>-1</sup>):** 3055, 2984, 2942, 2896, 1742, 1639, 1448, 1332, 1192, 1149, 1084, 1030, 965, 749, 688, 619, 597 and 546 cm<sup>-1</sup>. **HRMS (DART-TOF)** calculated for C<sub>20</sub>H<sub>19</sub>NNaO<sub>5</sub>S<sup>+</sup> [M+Na]<sup>+</sup> *m/z* 293.0454, found 293.0458.

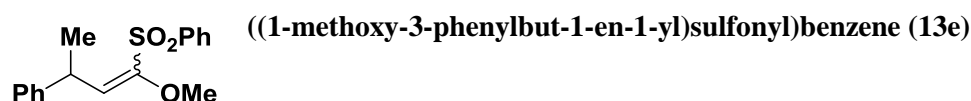

Following **General Procedure**, 2-phenylpropionaldehyde **13-SM2f** (3.0 mmol, 395 μL) and [(methoxymethyl)sulfonyl]benzene **13-SM1a** (3.3 mmol) were used. Compound **13e** was isolated by silica gel chromatography (SiO<sub>2</sub>, petroleum ether/ethyl acetate = 10/1) as a yellow oil (*E/Z* = 0.76:1, 580 mg, 64% yield).

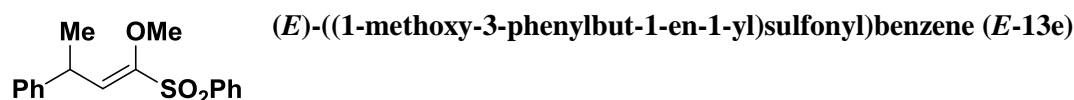

**<sup>1</sup>H NMR (400 MHz, CDCl<sub>3</sub>)** δ 7.87 (d, *J* = 7.2 Hz, 2H), 7.64 – 7.56 (m, 1H), 7.51 (t, *J* = 7.6 Hz, 2H), 7.34 – 7.27 (m, 2H), 7.22 (dd, *J* = 9.8, 4.4 Hz, 3H), 6.62 (d, *J* = 10.4 Hz, 1H), 3.92 – 3.84 (m, 1H), 3.81 (s, 3H), 1.41 (d, *J* = 7.2 Hz, 3H). **<sup>13</sup>C NMR (101 MHz, CDCl<sub>3</sub>)** δ 152.5, 143.5, 139.1, 133.6, 130.9, 129.2, 128.9, 128.3, 126.9, 63.5, 36.3, 21.8. **IR (thin film, cm<sup>-1</sup>):** 3064, 3028, 2969, 2936, 1646, 1448, 1307, 1161, 1135, 1094, 1064, 951, 688, 604 and 550 cm<sup>-1</sup>. **HRMS (DART-TOF)** calculated for C<sub>17</sub>H<sub>18</sub>NaO<sub>3</sub>S<sup>+</sup> [M+Na]<sup>+</sup> *m/z* 325.0869, found 325.0870.

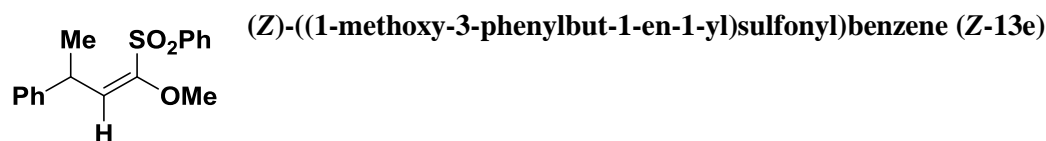

**<sup>1</sup>H NMR (400 MHz, CDCl<sub>3</sub>)** δ 7.88 (d, *J* = 7.2 Hz, 2H), 7.60 (t, *J* = 7.6 Hz, 1H), 7.49 (t, *J* = 7.6 Hz, 2H), 7.34 – 7.26 (m, 4H), 7.24 – 7.18 (m, 1H), 5.33 (d, *J* = 10.8 Hz, 1H), 5.02 – 4.88 (m, 1H), 3.55 (s, 3H), 1.44 (d, *J* = 6.8 Hz, 3H). **<sup>13</sup>C NMR (101 MHz, CDCl<sub>3</sub>)** δ 151.6, 145.1, 139.8, 133.7, 129.1, 128.7, 128.3, 127.0, 126.6, 119.5, 58.4, 34.8, 22.5. **IR (thin film, cm<sup>-1</sup>):** 3068, 3038, 2966, 2932, 1631, 1448, 1324, 1143, 1082, 777, 735, 700, 608 and 582 cm<sup>-1</sup>. **HRMS (DART-TOF)** calculated for C<sub>17</sub>H<sub>18</sub>NaO<sub>3</sub>S<sup>+</sup> [M+Na]<sup>+</sup> *m/z* 325.0869, found 325.0873.

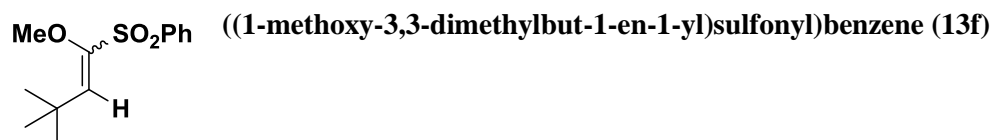

Following **General Procedure**, pivaldehyde **13-SM2g** (3.0 mmol, 326  $\mu$ L) and [(methoxymethyl)sulfonyl]benzene **13-SM1a** (3.3 mmol) were used. Compound **13f** was isolated by silica gel chromatography ( $\text{SiO}_2$ , petroleum ether/ethyl acetate = 10/1) as a yellow oil ( $E/Z$  = 0.81:1, 220 mg, 29% yield).

**$^1\text{H}$  NMR (400 MHz,  $\text{CDCl}_3$ )**  $\delta$  7.93 (dd,  $J$  = 17.6, 7.6 Hz, 3.4H,  $2\text{H}_E$ , 1.4  $\text{H}_Z$ ), 7.88 (t,  $J$  = 7.6 Hz, 1.7H,  $1\text{H}_E$ , 0.7  $\text{H}_Z$ ), 7.56 – 7.49 (m, 3.4H,  $2\text{H}_E$ , 1.4 $\text{H}_Z$ ), 6.38 (s, 1H,  $\text{H}_E$ ), 5.44 (s, 0.7H,  $\text{H}_Z$ ), 3.87 (s, 3H,  $\text{H}_E$ ), 3.52 (s, 2.1H,  $\text{H}_Z$ ), 1.39 (s, 6.3H,  $\text{H}_Z$ ), 1.16 (s, 9H,  $\text{H}_E$ ).  **$^{13}\text{C}$  NMR (101 MHz,  $\text{CDCl}_3$ )**  $\delta$  152.5 ( $\text{C}_Z$ ), 151.8 ( $\text{C}_E$ ), 140.0 ( $\text{C}_Z$ ), 139.6 ( $\text{C}_E$ ), 135.4 ( $\text{C}_E$ ), 133.5 ( $\text{C}_E$ ), 133.4 ( $\text{C}_Z$ ), 129.2 ( $\text{C}_E$ ), 128.9 ( $\text{C}_Z$ ), 128.6 ( $\text{C}_Z$ ), 128.1 ( $\text{C}_E$ ), 127.8 ( $\text{C}_Z$ ), 63.5 ( $\text{C}_E$ ), 59.6 ( $\text{C}_Z$ ), 33.1 ( $\text{C}_E$ ), 31.8 ( $\text{C}_Z$ ), 31.7 ( $\text{C}_Z$ ), 29.7 ( $\text{C}_E$ ). **IR (thin film,  $\text{cm}^{-1}$ ):** 2960, 2866, 1447, 1306, 1154, 1067, 752, 688, 659, 597 and 555  $\text{cm}^{-1}$ . **HRMS (DART-TOF)** calculated for  $\text{C}_{13}\text{H}_{18}\text{NaO}_3\text{S}^+$   $[\text{M}+\text{Na}]^+$   $m/z$  277.0869, found 277.0870.

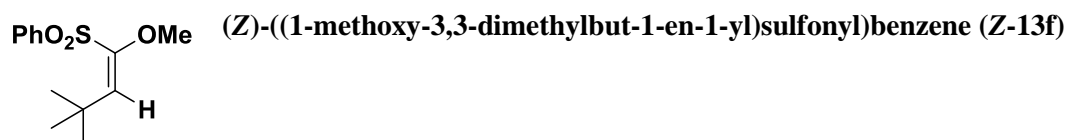

**$^1\text{H}$  NMR (400 MHz,  $\text{CDCl}_3$ )**  $\delta$  7.93 (d,  $J$  = 7.6 Hz, 2H), 7.62 (t,  $J$  = 7.6 Hz, 1H), 7.52 (t,  $J$  = 7.6 Hz, 2H), 5.44 (s, 1H), 3.52 (s, 3H), 1.39 (s, 9H).  **$^{13}\text{C}$  NMR (101 MHz,  $\text{CDCl}_3$ )**  $\delta$  152.5, 140.0, 133.5, 128.9, 128.6, 127.9, 59.6, 31.9, 31.7. **IR (thin film,  $\text{cm}^{-1}$ ):** 2958, 2869, 1614, 1447, 1320, 1156, 1130, 1081, 1035, 961, 828, 756, 728, 687, 658, 565, 514 and 458  $\text{cm}^{-1}$ .

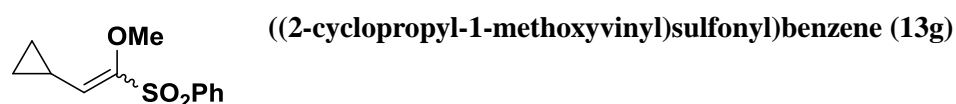

Following **General Procedure**, cyclopropanecarboxaldehyde **13-SM2h** (5.0 mmol, 374  $\mu$ L) and [(methoxymethyl)sulfonyl]benzene **13-SM1a** (5.5 mmol) were used. Compound **13g** was isolated by silica gel chromatography ( $\text{SiO}_2$ , petroleum ether/ethyl acetate = 10/1) as a yellow oil ( $E/Z$  = 0.82:1, 1.082 g, 91% yield).

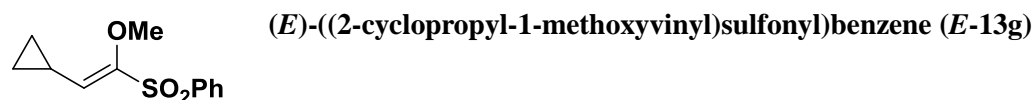

**$^1\text{H}$  NMR (400 MHz,  $\text{CDCl}_3$ )**  $\delta$  7.91 (d,  $J$  = 7.6 Hz, 2H), 7.61 (t,  $J$  = 7.6 Hz, 1H), 7.52 (t,  $J$  = 7.6 Hz, 2H), 5.88 (d,  $J$  = 10.6 Hz, 1H), 3.87 (s, 3H), 1.74 – 1.63 (m, 1H), 1.01 – 0.92 (m, 2H), 0.68 – 0.61 (m, 2H).  **$^{13}\text{C}$  NMR (101 MHz,  $\text{CDCl}_3$ )**  $\delta$  152.6, 139.3, 133.4, 132.4, 129.1, 128.2, 63.2, 9.0, 8.4. **IR (thin film,  $\text{cm}^{-1}$ ):** 3065, 3008, 2943, 2843, 1644, 1446, 1372, 1308, 1148,

1096, 1063, 954, 852, 753, 714, 689, 649, 590 and 551  $\text{cm}^{-1}$ . **HRMS (DART-TOF)** calculated for  $\text{C}_{12}\text{H}_{14}\text{NaO}_3\text{S}^+$   $[\text{M}+\text{Na}]^+$   $m/z$  261.0556, found 261.0559.

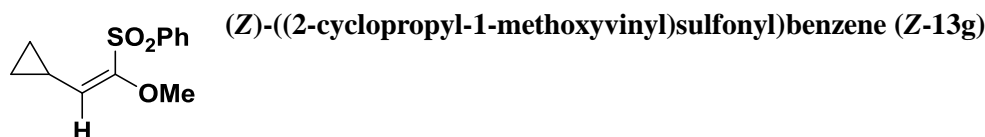

**$^1\text{H}$  NMR (400 MHz,  $\text{CDCl}_3$ )**  $\delta$  7.97 (d,  $J = 7.2$  Hz, 2H), 7.63 (t,  $J = 7.6$  Hz, 1H), 7.54 (t,  $J = 7.6$  Hz, 2H), 4.74 (d,  $J = 10.6$  Hz, 1H), 3.57 (s, 3H), 2.78 – 2.70 (m, 1H), 1.05 – 0.87 (m, 2H), 0.48 – 0.35 (m, 2H).  **$^{13}\text{C}$  NMR (101 MHz,  $\text{CDCl}_3$ )**  $\delta$  151.8, 140.2, 133.6, 129.1, 128.1, 124.0, 59.8, 8.6, 8.1. **IR (thin film,  $\text{cm}^{-1}$ ):** 3074, 3007, 2942, 2837, 1636, 1448, 1322, 1306, 1193, 1150, 1132, 1082, 975, 758, 734, 689, 602 and 572  $\text{cm}^{-1}$ . **HRMS (DART-TOF)** calculated for  $\text{C}_{12}\text{H}_{14}\text{NaO}_3\text{S}^+$   $[\text{M}+\text{Na}]^+$   $m/z$  261.0556, found 261.0558.

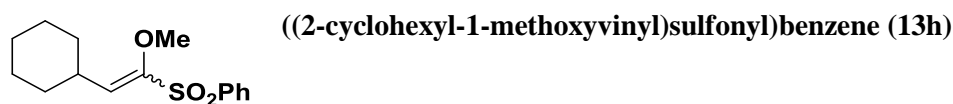

Following **General Procedure**, cyclohexanecarboxaldehyde **13-SM2i** (3.0 mmol, 363  $\mu\text{L}$ ) and [(methoxymethyl)sulfonyl]benzene **13-SM1a** (3.3 mmol) were used. Compound **13h** was isolated by silica gel chromatography ( $\text{SiO}_2$ , petroleum ether/ethyl acetate = 10/1) as a yellow oil ( $E/Z = 0.91:1$ , 777 mg, 92% yield).

**$^1\text{H}$  NMR (400 MHz,  $\text{CDCl}_3$ )**  $\delta$  7.96 – 7.83 (m, 2.42H,  $2\text{H}_E$ , 0.42 $\text{H}_Z$ ), 7.60 (t,  $J = 7.6$  Hz, 1.21H,  $1\text{H}_E$ , 0.21 $\text{H}_Z$ ), 7.52 (t,  $J = 7.6$  Hz, 2.42H,  $2\text{H}_E$ , 0.42 $\text{H}_Z$ ), 6.31 (d,  $J = 10.2$  Hz, 1H,  $\text{H}_E$ ), 5.10 (d,  $J = 10.2$  Hz, 0.21H,  $\text{H}_Z$ ), 3.81 (s, 3H,  $\text{H}_E$ ), 3.55 (s, 0.64H,  $\text{H}_Z$ ), 3.39 – 3.28 (m, 0.21H,  $\text{H}_Z$ ), 2.49 – 2.37 (m, 1H,  $\text{H}_E$ ), 1.82 – 1.70 (m, 3H,  $2.5\text{H}_E$ , 0.5 $\text{H}_Z$ ), 1.69 – 1.58 (m, 3H,  $2.5\text{H}_E$ , 0.5 $\text{H}_Z$ ), 1.43 – 1.04 (m, 6.05H,  $5\text{H}_E$ , 1.05 $\text{H}_Z$ ).  **$^{13}\text{C}$  NMR (101 MHz,  $\text{CDCl}_3$ )**  $\delta$  152.2 ( $\text{C}_E$ ), 151.5 ( $\text{C}_Z$ ), 140.1 ( $\text{C}_Z$ ), 139.2 ( $\text{C}_E$ ), 133.5 ( $\text{C}_Z$ ), 133.4 ( $\text{C}_E$ ), 132.0 ( $\text{C}_E$ ), 129.1 ( $\text{C}_E$ ), 128.9 ( $\text{C}_Z$ ), 128.2 ( $\text{C}_E$ ), 128.1 ( $\text{C}_Z$ ), 120.9 ( $\text{C}_Z$ ), 63.7 ( $\text{C}_E$ ), 58.5 ( $\text{C}_Z$ ), 35.3 ( $\text{C}_E$ ), 34.2 ( $\text{C}_Z$ ), 33.9 ( $\text{C}_Z$ ), 32.2 ( $\text{C}_E$ ), 25.8 ( $\text{C}_Z$ ), 25.7 ( $\text{C}_E$ ), 25.6 ( $\text{C}_Z$ ), 25.4 ( $\text{C}_E$ ). **IR (thin film,  $\text{cm}^{-1}$ ):** 2925, 2851, 1633, 1447, 1322, 1145, 1128, 1081, 1063, 973, 894, 844, 740, 688, 599, 562 and 540  $\text{cm}^{-1}$ . **HRMS (DART-TOF)** calculated for  $\text{C}_{15}\text{H}_{20}\text{NNaO}_3\text{S}^+$   $[\text{M}+\text{Na}]^+$   $m/z$  303.1025, found 303.1027.

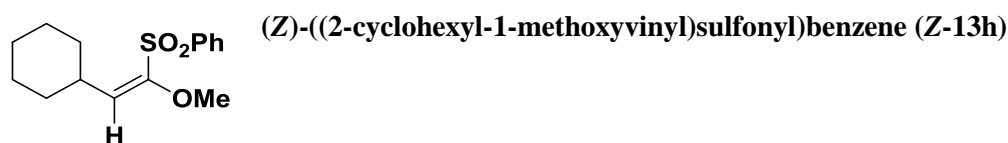

**$^1\text{H}$  NMR (400 MHz,  $\text{CDCl}_3$ )**  $\delta$  7.92 (d,  $J = 7.6$  Hz, 2H), 7.62 (t,  $J = 7.6$  Hz, 1H), 7.53 (t,  $J = 7.6$  Hz, 2H), 5.10 (d,  $J = 10.4$  Hz, 1H), 3.55 (s, 3H), 3.39 – 3.29 (m, 1H), 1.76 – 1.66 (m, 5H), 1.46 – 1.30 (m, 2H), 1.22 – 1.00 (m, 3H).  **$^{13}\text{C}$  NMR (101 MHz,  $\text{CDCl}_3$ )**  $\delta$  151.5, 140.1, 133.5, 129.0, 128.1, 120.9, 58.5, 34.2, 33.9, 25.8, 25.6. **IR (thin film,  $\text{cm}^{-1}$ ):** 2924, 2850, 1633, 1447, 1322, 1292, 1146, 1127, 1081, 973, 894, 740, 688, 609, 592, 540 and 520  $\text{cm}^{-1}$ .

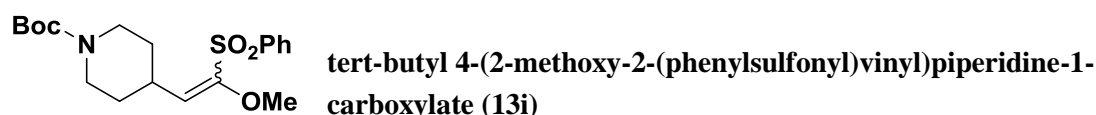

Following **General Procedure**, 1-tert-Butoxycarbonyl-4-piperidinecarboxaldehyde **13-SM2j** (3.0 mmol, 640 mg) and [(methoxymethyl)sulfonyl]benzene **13-SM1a** (3.3 mmol) were used. Compound **13i** was isolated by silica gel chromatography (SiO<sub>2</sub>, petroleum ether/ethyl acetate = 6/1) as a light yellow oil (*E/Z* = 0.7:1, 626 mg, 64% yield).

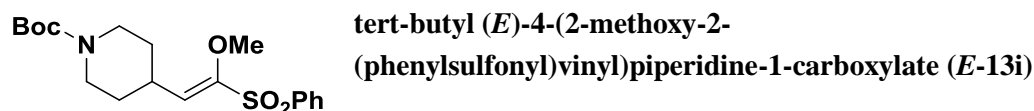

<sup>1</sup>H NMR (400 MHz, CDCl<sub>3</sub>) δ 7.89 (d, *J* = 7.2 Hz, 2H), 7.63 (t, *J* = 7.6 Hz, 1H), 7.54 (t, *J* = 7.6 Hz, 2H), 6.28 (d, *J* = 9.8 Hz, 1H), 4.24 – 3.99 (m, 2H), 3.85 (s, 3H), 2.77 (t, *J* = 12.0 Hz, 2H), 2.66 – 2.50 (m, 1H), 1.67 – 1.57 (m, 2H), 1.46 (s, 9H), 1.45 – 1.34 (m, 2H). <sup>13</sup>C NMR (101 MHz, CDCl<sub>3</sub>) δ 154.8, 153.4, 139.0, 133.7, 129.7, 129.2, 128.3, 79.7, 63.7, 43.2, 33.6, 31.1, 28.5. IR (thin film, cm<sup>-1</sup>): 2982, 2934, 2857, 1688, 1423, 1143, 1162, 972, 779, 689 and 603 cm<sup>-1</sup>. HRMS (DART-TOF) calculated for C<sub>19</sub>H<sub>27</sub>NNaO<sub>5</sub>S<sup>+</sup> [M+Na]<sup>+</sup> *m/z* 404.1502, found 404.1507.

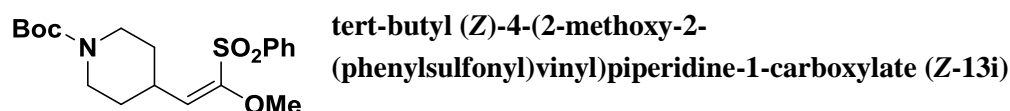

<sup>1</sup>H NMR (400 MHz, CDCl<sub>3</sub>) δ 7.92 (d, *J* = 7.2 Hz, 2H), 7.64 (t, *J* = 7.6 Hz, 1H), 7.55 (t, *J* = 7.6 Hz, 2H), 5.01 (d, *J* = 10.2 Hz, 1H), 4.18 – 4.02 (m, 2H), 3.56 (s, 3H), 3.51 (m, 1H), 2.82 (t, *J* = 11.6 Hz, 2H), 1.79 – 1.68 (m, 2H), 1.47 (s, 9H), 1.34 – 1.21 (m, 2H). <sup>13</sup>C NMR (101 MHz, CDCl<sub>3</sub>) δ 154.8, 152.5, 139.6, 133.7, 129.0, 128.2, 117.5, 79.4, 58.2, 43.3, 32.8, 32.6, 28.5. IR (thin film, cm<sup>-1</sup>): 2975, 2933, 2852, 1686, 1424, 1325, 1146, 1082, 975 and 613 cm<sup>-1</sup>. HRMS (DART-TOF) calculated for C<sub>19</sub>H<sub>27</sub>NNaO<sub>5</sub>S<sup>+</sup> [M+Na]<sup>+</sup> *m/z* 404.1502, found 404.1510.

## 5.2 preparation of $\alpha$ -Benzyloxy VinylSulfones

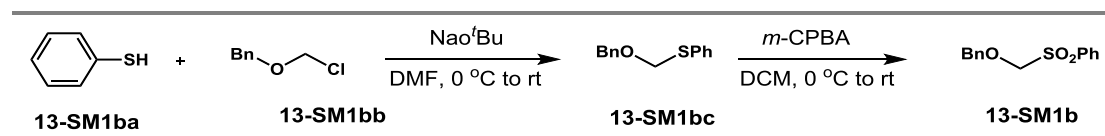

To a DMF solution (30 mL) of NaO<sup>t</sup>Bu (9.6 mmol, 1.2 equiv) cooled at 0 °C was added thiophenol **13-SM1ba** (8.0 mmol, 1.0 equiv) dropwise under nitrogen atmosphere. After 30 min, benzylchloromethyl ether **13-SM1bb** (8.8 mmol, 1.1 equiv) was added dropwise over 10 min. The reaction was allowed to warm to room temperature and stirred overnight, before being quenched with brine at 0 °C. The mixture was extracted with ethyl acetate, and the combined organic layers were dried and concentrated in vacuo. The resulting residue was purified by flash chromatography of petroleum ether to give **13-SM1bc** as a colorless oil (1.84g, 99% yield).

To a DCM solution (30 mL) of **13-SM1bc** (7.5 mmol, 1.0 equiv) cooled at 0 °C was added *m*-CPBA (18.0 mmol, 2.4 equiv) dropwise over 10 min. The reaction was allowed to warm to room temperature and stirred for another 2h, and then diluted by addition of DCM. The mixture washed by sat. aq. NaHCO<sub>3</sub> ( $\times 2$ ), and brine ( $\times 1$ ). The mixture was extracted with ethyl acetate, and the combined organic layers were dried and concentrated in vacuo. The resulting residue was purified by flash chromatography (petroleum ether/ethyl acetate = 6/1) to give **13-SM1b** as a white solid (0.9g, 64% yield).

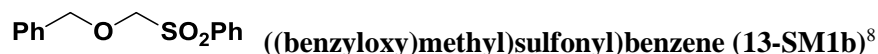

<sup>1</sup>H NMR (400 MHz, CDCl<sub>3</sub>)  $\delta$  7.95 (d,  $J = 7.2$  Hz, 2H), 7.68 (t,  $J = 7.2$  Hz, 1H), 7.57 (t,  $J = 8.0$  Hz, 2H), 7.41 – 7.30 (m, 3H), 7.29 – 7.24 (m, 2H), 4.90 (s, 2H), 4.57 (s, 2H). <sup>13</sup>C NMR (101 MHz, CDCl<sub>3</sub>)  $\delta$  137.3, 135.8, 134.1, 129.2, 128.7, 128.6, 128.38, 128.2, 84.7, 74.5.

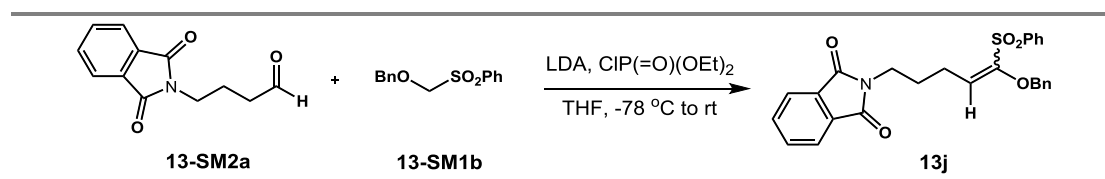

To a THF solution (15 mL) of (((benzyloxy)methylsulfonyl)benzene (**13-SM1b**, 3.3 mmol, 1.1 equiv) cooled at -78 °C was added LDA (9.0 mmol, 3.0 equiv, 2.0 M in THF) dropwise under nitrogen atmosphere. After 15 min, diethyl chlorophosphate (4.5 mmol, 1.5 equiv) was added dropwise over 10 min. The reaction mixture was stirred for 1 h, and a solution of aldehyde (**13-SM2a**, 3.0 mmol, 1.0 equiv) in THF (5 mL) was added over 5 min. The reaction was allowed to warm to room temperature and stirred overnight, before being quenched with saturated aqueous NH<sub>4</sub>Cl at 0 °C. The mixture was extracted with ethyl acetate, and the combined organic layers were dried and concentrated in vacuo. The resulting residue was purified by flash chromatography to give **13j** as a separable mixture of *E/Z* isomers.

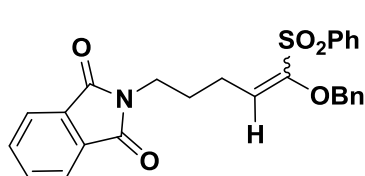

2-(5-(benzyloxy)-5-(phenylsulfonyl)pent-4-en-1-yl)isoindoline-1,3-dione (**13j**)

Following **General Procedure**, 4-(1,3-dioxoisoindolin-2-yl)butanal **13-SM2a** (5.0 mmol, 1.086 g) and (((benzyloxy)methyl)sulfonyl)benzene **13-SM1b** (5.5 mmol) were used. Compound **13j** was isolated by silica gel chromatography (SiO<sub>2</sub>, petroleum ether/ethyl acetate = 6/1) as a yellow oil (*E/Z* = 1:0.73, 1.98 g, 86% yield).

**<sup>1</sup>H NMR (400 MHz, CDCl<sub>3</sub>)** δ 7.83 (dd, *J* = 7.2, 1.5 Hz, 3.36H, 1.36H<sub>E</sub>, 2H<sub>Z</sub>), 7.78 – 7.70 (m, 3.36H, 1.36H<sub>E</sub>, 2H<sub>Z</sub>), 7.65 – 7.58 (m, 3.36H, 1.36H<sub>E</sub>, 2H<sub>Z</sub>), 7.58 – 7.47 (m, 1.68H, 0.68H<sub>E</sub>, 1H<sub>Z</sub>), 7.43 (t, *J* = 7.6 Hz, 3.37H, 0.68H<sub>E</sub>, 1H<sub>Z</sub>), 7.26 – 7.15 (m, 6.63H, 2.63H<sub>E</sub>, 4H<sub>Z</sub>), 7.10 – 7.03 (m, 1.7H, 0.7H<sub>E</sub>, 1H<sub>Z</sub>), 6.40 (t, *J* = 7.6 Hz, 0.68H, H<sub>E</sub>), 5.34 (t, *J* = 8.0 Hz, 1H, H<sub>Z</sub>), 4.99 (s, 1.37H, H<sub>E</sub>), 4.75 (s, 2H, H<sub>Z</sub>), 3.62 (t, *J* = 7.2 Hz, 2H, H<sub>Z</sub>), 3.49 (t, *J* = 7.2 Hz, 1.39H, H<sub>E</sub>), 2.65 (dd, *J* = 15.2, 7.6 Hz, 2H, H<sub>Z</sub>), 1.96 (dd, *J* = 15.6, 7.6 Hz, 1.4H, H<sub>E</sub>), 1.82 – 1.68 (m, 2H, H<sub>Z</sub>), 1.63 – 1.50 (m, 1.38H, H<sub>E</sub>). **<sup>13</sup>C NMR (101 MHz, CDCl<sub>3</sub>)** δ 168.4 (C<sub>Z</sub>), 168.2 (C<sub>E</sub>), 152.3 (C<sub>E</sub>), 151.9 (C<sub>Z</sub>), 139.6 (C<sub>Z</sub>), 139.1 (C<sub>E</sub>), 135.6 (C<sub>E</sub>), 135.4 (C<sub>Z</sub>), 134.1 (C<sub>E</sub>), 134.0 (C<sub>Z</sub>), 133.7 (C<sub>Z</sub>), 133.6 (C<sub>E</sub>), 132.2 (C<sub>Z</sub>), 132.1 (C<sub>E</sub>), 129.2, 129.1 (C<sub>E</sub>), 129.0 (C<sub>Z</sub>), 128.8, 128.6 (C<sub>Z</sub>), 128.5 (C<sub>E</sub>), 128.5 (C<sub>Z</sub>), 128.4 (C<sub>E</sub>), 127.8, 127.1 (C<sub>E</sub>), 123.3 (C<sub>E</sub>), 123.3 (C<sub>Z</sub>), 117.3 (C<sub>Z</sub>), 77.3 (C<sub>E</sub>), 74.1 (C<sub>Z</sub>), 37.4 (C<sub>E</sub>), 37.2 (C<sub>Z</sub>), 29.0 (C<sub>Z</sub>), 27.4 (C<sub>E</sub>), 23.4 (C<sub>E</sub>), 22.7 (C<sub>Z</sub>). **IR (thin film, cm<sup>-1</sup>):** 3064, 3038, 2930, 2863, 1770, 1708, 1445, 1396, 1329, 2240, 2084, 1025, 892, 797, 719, 689, 623, 596 and 531 cm<sup>-1</sup>. **HRMS (DART-TOF)** calculated for C<sub>26</sub>H<sub>23</sub>NNaO<sub>5</sub>S<sup>+</sup> [M+Na]<sup>+</sup> *m/z* 484.1189, found 484.1184.

## 6. Characterization Data for Products in Table 2

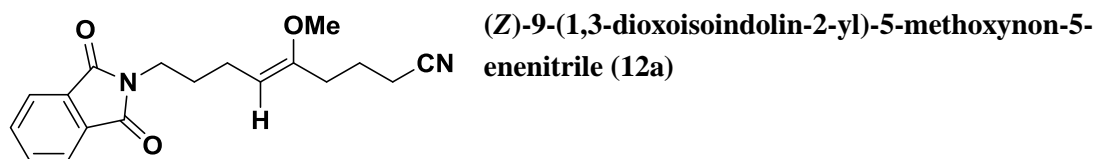

The product **12a** was prepared following **General Procedure** at 0.2 mmol scale, purification by flash chromatography (SiO<sub>2</sub>, petroleum ether: EtOAc = 1:0 to 10:1) afforded the title product as a colorless oil (40.3 mg, 0.13 mmol, 64%).

<sup>1</sup>H NMR (400 MHz, CDCl<sub>3</sub>) δ 7.85 – 7.83 (m, 2H), 7.76 – 7.61 (m, 2H), 4.63 (t, *J* = 7.2 Hz, 1H), 3.68 (t, *J* = 7.6 Hz, 2H), 3.50 (s, 3H), 2.37 (t, *J* = 7.2 Hz, 2H), 2.26 (t, *J* = 7.2 Hz, 2H), 2.13 (q, *J* = 7.2 Hz, 2H), 1.82 – 1.75 (m, 2H), 1.75 – 1.68 (m, 2H). <sup>13</sup>C NMR (101 MHz, CDCl<sub>3</sub>) δ 168.5, 153.5, 134.0, 132.3, 123.3, 119.7, 111.0, 56.7, 37.8, 30.0, 28.7, 22.9, 22.3, 16.3. IR (thin film, cm<sup>-1</sup>): 2943, 2876, 1705, 1466, 1396, 1370, 1174, 1033, 945, 862, 795, 719, 622 and 530 cm<sup>-1</sup>. HRMS (DART-TOF) calculated for C<sub>18</sub>H<sub>20</sub>N<sub>2</sub>NaO<sub>3</sub><sup>+</sup> [M+Na]<sup>+</sup> *m/z* 335.1366, found 335.1371.

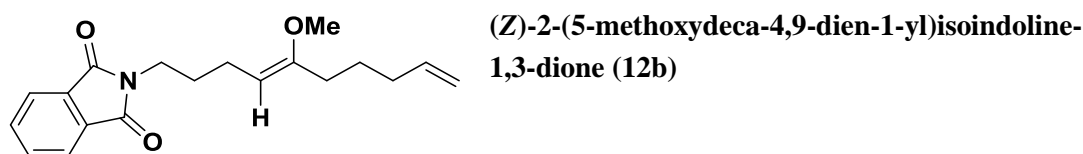

The product **12b** was prepared following **General Procedure** at 0.2 mmol scale, purification by flash chromatography (SiO<sub>2</sub>, petroleum ether: EtOAc = 1:0 to 10:1) afforded the title product as a yellow oil (36.6 mg, 0.12 mmol, 58%).

<sup>1</sup>H NMR (400 MHz, CDCl<sub>3</sub>) δ 7.83 (dd, *J* = 5.6, 3.2 Hz, 2H), 7.70 (dd, *J* = 5.6, 3.2 Hz, 2H), 5.88 – 5.70 (m, 1H), 5.01 (ddd, *J* = 17.2, 3.2, 1.6 Hz, 1H), 4.98 – 4.92 (m, 1H), 4.51 (t, *J* = 7.2 Hz, 1H), 3.69 (t, *J* = 7.6 Hz, 2H), 3.50 (s, 3H), 2.14 – 2.02 (m, 6H), 1.74 – 1.67 (m, 2H), 1.55 – 1.47 (m, 2H). <sup>13</sup>C NMR (101 MHz, CDCl<sub>3</sub>) δ 168.5, 155.6, 138.6, 133.9, 132.4, 123.2, 123.2, 114.9, 108.3, 56.2, 37.9, 33.2, 30.6, 28.8, 26.4, 22.3. IR (thin film, cm<sup>-1</sup>): 2936, 2860, 1707, 1437, 1395, 1368, 1188, 1112, 1041, 912, 794, 719, 623 and 530 cm<sup>-1</sup>. HRMS (DART-TOF) calculated for C<sub>19</sub>H<sub>23</sub>NNaO<sub>3</sub><sup>+</sup> [M+Na]<sup>+</sup> *m/z* 336.1570, found 336.1574.

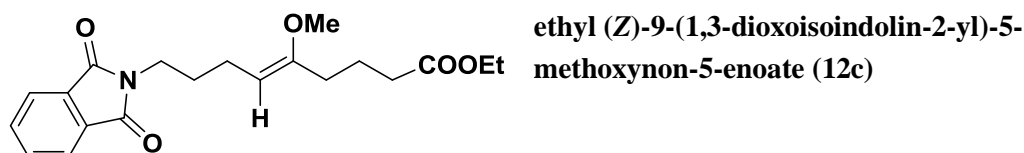

The product **12c** was prepared following **General Procedure** at 0.2 mmol scale, purification by flash chromatography (SiO<sub>2</sub>, petroleum ether: EtOAc = 1:0 to 10:1) afforded the title product as a yellow oil (54.6 mg, 0.15 mmol, 76%).



**<sup>1</sup>H NMR (400 MHz, CDCl<sub>3</sub>)** δ 7.83 (dd, *J* = 5.6, 3.2 Hz, 2H), 7.71 (dd, *J* = 5.6, 3.2 Hz, 2H), 4.53 (t, *J* = 7.2 Hz, 1H), 4.13 (q, *J* = 7.2 Hz, 2H), 3.68 (t, *J* = 7.6 Hz, 2H), 3.51 (s, 3H), 2.32 (t, *J* = 7.6 Hz, 2H), 2.18 – 2.07 (m, 4H), 1.73 (tt, *J* = 14.8, 7.6 Hz, 4H), 1.25 (t, *J* = 7.2 Hz, 3H). **<sup>13</sup>C NMR (101 MHz, CDCl<sub>3</sub>)** δ 173.5, 168.4, 154.7, 133.8, 132.3, 123.1, 109.0, 60.3, 56.3, 37.9, 33.4, 30.5, 28.7, 22.4, 22.2, 14.3. **IR (thin film, cm<sup>-1</sup>):** 2938, 2847, 1707, 1437, 1395, 1369, 1186, 1038, 888, 794, 719, 623 and 530 cm<sup>-1</sup>. **HRMS (DART-TOF)** calculated for C<sub>20</sub>H<sub>25</sub>NNaO<sub>5</sub><sup>+</sup> [M+Na]<sup>+</sup> *m/z* 382.1625, found 382.1630.

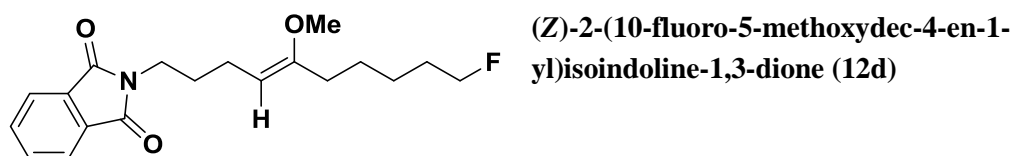

The product **12d** was prepared following **General Procedure** at 0.2 mmol scale, purification by flash chromatography (SiO<sub>2</sub>, petroleum ether: EtOAc = 1:0 to 10:1) afforded the title product as a colorless oil (34.0 mg, 0.12 mmol, 58%).

**<sup>1</sup>H NMR (400 MHz, CDCl<sub>3</sub>)** δ 7.83 (dd, *J* = 5.4, 3.1 Hz, 2H), 7.70 (dd, *J* = 5.4, 3.0 Hz, 2H), 4.55 – 4.46 (m, 2H), 4.38 (t, *J* = 6.2 Hz, 1H), 3.68 (t, *J* = 7.6 Hz, 2H), 3.50 (s, 3H), 2.11 (dt, *J* = 13.8, 7.1 Hz, 4H), 1.78 – 1.65 (m, 4H), 1.52 – 1.34 (m, 4H). **<sup>13</sup>C NMR (101 MHz, CDCl<sub>3</sub>)** δ 168.5, 155.6, 133.9, 132.4, 123.2, 108.4, 84.2 (d, *J* = 163.3 Hz), 56.3, 38.0, 31.1, 30.4 (d, *J* = 19.4 Hz), 28.8, 26.9, 24.8 (d, *J* = 5.5 Hz), 22.3. **IR (thin film, cm<sup>-1</sup>):** 2937, 2861, 1706, 1436, 1367, 1171, 1111, 1639, 887, 794, 718, 622 and 530 cm<sup>-1</sup>. **HRMS (DART-TOF)** calculated for C<sub>19</sub>H<sub>24</sub>FNNaO<sub>3</sub><sup>+</sup> [M+Na]<sup>+</sup> *m/z* 356.1632, found 356.1626.

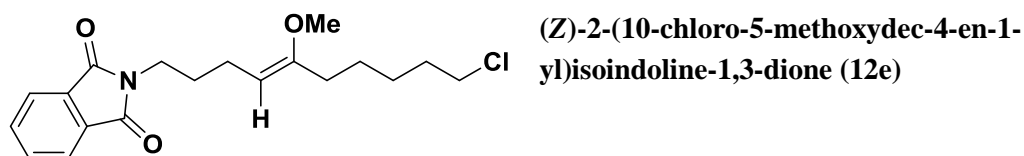

The product **12e** was prepared following **General Procedure** at 0.2 mmol scale, purification by flash chromatography (SiO<sub>2</sub>, petroleum ether: EtOAc = 1:0 to 10:1) afforded the title product as a colorless oil (36.0 mg, 0.12 mmol, 58%).

**<sup>1</sup>H NMR (400 MHz, CDCl<sub>3</sub>)** δ 7.83 (dd, *J* = 5.6, 3.2 Hz, 2H), 7.70 (dd, *J* = 5.6, 3.2 Hz, 2H), 4.51 (t, *J* = 7.2 Hz, 1H), 3.68 (t, *J* = 7.6 Hz, 2H), 3.53 (t, *J* = 6.8 Hz, 2H), 3.50 (s, 3H), 2.15 – 2.09 (m, 4H), 1.82 – 1.69 (m, 4H), 1.44 (dt, *J* = 7.2, 3.6 Hz, 4H). **<sup>13</sup>C NMR (101 MHz, CDCl<sub>3</sub>)** δ 168.5, 155.5, 133.9, 132.4, 123.2, 108.5, 56.3, 45.1, 38.0, 32.6, 31.1, 28.8, 26.5, 26.5, 22.3. **IR (thin film, cm<sup>-1</sup>):** 2933, 2857, 1708, 1437, 1395, 1367, 1188, 1107, 1041, 887, 793, 719, 649 and 530 cm<sup>-1</sup>. **HRMS (DART-TOF)** calculated for C<sub>19</sub>H<sub>24</sub>ClNNaO<sub>3</sub><sup>+</sup> [M+Na]<sup>+</sup> *m/z* 372.1337, found 372.1350.

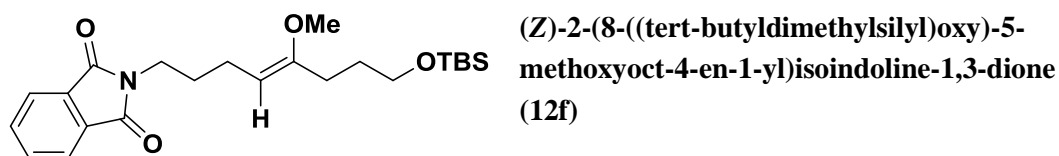

The product **12f** was prepared following **General Procedure** at 0.2 mmol scale, purification by flash chromatography (SiO<sub>2</sub>, petroleum ether: EtOAc = 1:0 to 10:1) afforded the title product as a colorless oil (56.8 mg, 0.14 mmol, 68%).

**<sup>1</sup>H NMR (400 MHz, CDCl<sub>3</sub>)** δ 7.80 (dd, *J* = 5.2, 3.2 Hz, 2H), 7.67 (dd, *J* = 5.6, 3.2 Hz, 2H), 4.49 (t, *J* = 7.2 Hz, 1H), 3.66 (t, *J* = 7.6 Hz, 2H), 3.59 (t, *J* = 6.0 Hz, 2H), 3.48 (s, 3H), 2.10 (dt, *J* = 15.2, 7.8 Hz, 4H), 1.74 – 1.65 (m, 2H), 1.63 – 1.56 (m, 2H), 0.86 (s, 9H), 0.02 (s, 6H). **<sup>13</sup>C NMR (101 MHz, CDCl<sub>3</sub>)** δ 168.4, 155.5, 133.9, 132.3, 123.2, 108.0, 62.4, 56.1, 37.9, 30.5, 28.8, 27.5, 26.0, 22.2, 18.4, -5.2. **IR (thin film, cm<sup>-1</sup>):** 2930, 2856, 1711, 1437, 1394, 1256, 1099, 835, 775, 720, 529, 480, 432 and 407 cm<sup>-1</sup>. **HRMS (DART-TOF)** calculated for C<sub>23</sub>H<sub>35</sub>NNaO<sub>4</sub>Si<sup>+</sup> [M+Na]<sup>+</sup> *m/z* 440.2228, found 440.2225.

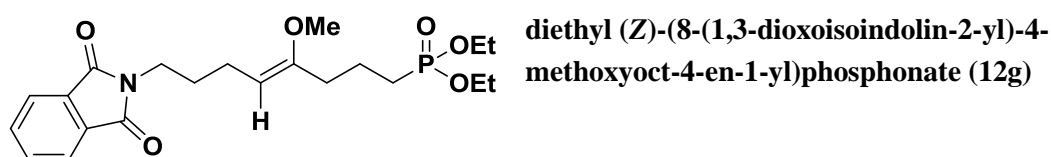

The product **12g** was prepared following **General Procedure** at 0.2 mmol scale, purification by flash chromatography (SiO<sub>2</sub>, petroleum ether: EtOAc = 1:0 to 1:1) afforded the title product as a colorless oil (55.1 mg, 0.13 mmol, 64%).

**<sup>1</sup>H NMR (400 MHz, CDCl<sub>3</sub>)** δ 7.83 (dd, *J* = 5.6, 3.2 Hz, 2H), 7.74 – 7.68 (m, 2H), 4.55 (t, *J* = 7.2 Hz, 1H), 4.17 – 4.01 (m, 4H), 3.68 (t, *J* = 7.6 Hz, 2H), 3.50 (s, 3H), 2.18 (t, *J* = 6.4 Hz, 2H), 2.15 – 2.07 (m, 2H), 1.79 – 1.66 (m, 6H), 1.32 (t, *J* = 7.2 Hz, 6H). **<sup>13</sup>C NMR (101 MHz, CDCl<sub>3</sub>)** δ 168.4, 154.4, 133.9, 132.3, 123.2, 109.5, 61.5 (d, *J* = 6.4 Hz), 56.4, 37.8, 31.8 (d, *J* = 16.5 Hz), 28.7, 24.7 (d, *J* = 140.2 Hz), 22.2, 20.1 (d, *J* = 4.7 Hz), 16.5 (d, *J* = 6.0 Hz). **IR (thin film, cm<sup>-1</sup>):** 2985, 2943, 2909, 1707, 1438, 1396, 1368, 1234, 1165, 1022, 957, 794, 720, 604, and 530 cm<sup>-1</sup>. **HRMS (DART-TOF)** calculated for C<sub>21</sub>H<sub>30</sub>NNaO<sub>6</sub>P<sup>+</sup> [M+Na]<sup>+</sup> *m/z* 446.1703, found 446.1705.

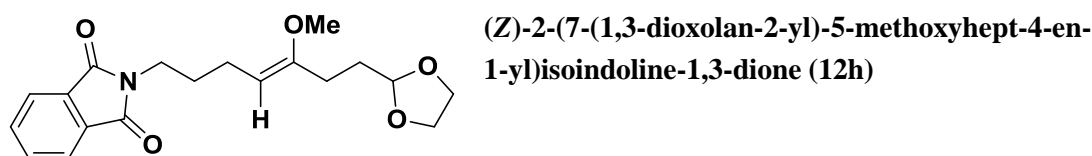

The product **12h** was prepared following **General Procedure** at 0.2 mmol scale, purification by flash chromatography (SiO<sub>2</sub>, petroleum ether: EtOAc = 1:0 to 10:1) afforded the title product as a yellow oil (48.9 mg, 0.14 mmol, 71%).

**<sup>1</sup>H NMR (400 MHz, CDCl<sub>3</sub>)** δ 7.83 (dd, *J* = 5.6, 3.2 Hz, 2H), 7.70 (dd, *J* = 5.6, 3.2 Hz, 2H), 4.89 (t, *J* = 4.8 Hz, 1H), 4.55 (t, *J* = 7.2 Hz, 1H), 4.01 – 3.93 (m, 2H), 3.89 – 3.82 (m, 2H), 3.68 (t, *J* = 7.6 Hz, 2H), 3.51 (s, 3H), 2.26 – 2.17 (m, 2H), 2.12 (q, *J* = 7.2 Hz, 2H), 1.82 – 1.75 (m,

2H), 1.75 – 1.67 (m, 2H). <sup>13</sup>C NMR (101 MHz, CDCl<sub>3</sub>) δ 168.4, 155.1, 133.9, 132.3, 123.2, 108.4, 103.9, 65.0, 56.3, 37.9, 31.6, 28.7, 25.6, 22.2. IR (thin film, cm<sup>-1</sup>): 2942, 2870, 1703, 1437, 1396, 1363, 1129, 1041, 947, 749, 719, 621 and 530 cm<sup>-1</sup>. HRMS (DART-TOF) calculated for C<sub>19</sub>H<sub>23</sub>NNaO<sub>5</sub><sup>+</sup> [M+Na]<sup>+</sup> m/z 368.1468, found 368.1465.

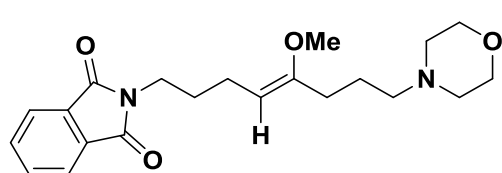

(Z)-2-(5-methoxy-8-morpholinooct-4-en-1-yl)isoindoline-1,3-dione (12i)

The product **12i** was prepared following **General Procedure** at 0.2 mmol scale, purification by flash chromatography (SiO<sub>2</sub>, petroleum ether: EtOAc = 1:0 to 1:1) afforded the title product as a colorless oil (48.4 mg, 0.13 mmol, 66%).

<sup>1</sup>H NMR (400 MHz, CDCl<sub>3</sub>) δ 7.83 (dd, *J* = 5.6, 3.2 Hz, 2H), 7.74 – 7.66 (m, 2H), 4.53 (t, *J* = 7.2 Hz, 1H), 3.73 – 3.65 (m, 6H), 3.50 (s, 3H), 2.43 (t, *J* = 4.4 Hz, 4H), 2.34 (t, *J* = 7.6 Hz, 2H), 2.14 – 2.09 (m, 4H), 1.77 – 1.66 (m, 2H), 1.66 – 1.55 (m, 2H). <sup>13</sup>C NMR (101 MHz, CDCl<sub>3</sub>) δ 168.5, 155.4, 133.9, 132.3, 123.2, 108.5, 67.1, 58.4, 56.3, 53.8, 37.9, 29.0, 28.8, 24.2, 22.2. IR (thin film, cm<sup>-1</sup>): 2942, 2854, 2808, 1707, 1438, 1396, 1367, 1188, 1116, 1069, 958, 916, 864, 720, 625 and 530 cm<sup>-1</sup>. HRMS (DART-TOF) calculated for C<sub>21</sub>H<sub>29</sub>N<sub>2</sub>O<sub>4</sub><sup>+</sup> [M+H]<sup>+</sup> m/z 373.2122, found 373.2122.

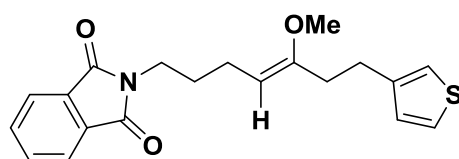

(Z)-2-(5-methoxy-7-(thiophen-3-yl)hept-4-en-1-yl)isoindoline-1,3-dione (12j)

The product **12j** was prepared following **General Procedure** at 0.2 mmol scale, purification by flash chromatography (SiO<sub>2</sub>, petroleum ether: EtOAc = 1:0 to 10:1) afforded the title product as a yellow oil (32.1 mg, 0.09 mmol, 45%).

<sup>1</sup>H NMR (400 MHz, CDCl<sub>3</sub>) δ 7.83 (dd, *J* = 5.2, 3.2 Hz, 2H), 7.70 (dd, *J* = 5.2, 3.2 Hz, 2H), 7.23 (dd, *J* = 4.8, 3.2 Hz, 1H), 6.94 (t, *J* = 4.4 Hz, 2H), 4.54 (t, *J* = 7.2 Hz, 1H), 3.66 (t, *J* = 7.6 Hz, 2H), 3.53 (s, 3H), 2.80 – 2.70 (m, 2H), 2.43 – 2.35 (m, 2H), 2.12 (q, *J* = 7.2 Hz, 2H), 1.74 – 1.67 (m, 2H). <sup>13</sup>C NMR (101 MHz, CDCl<sub>3</sub>) δ 168.5, 155.1, 142.0, 133.9, 132.3, 128.3, 125.4, 123.2, 120.3, 108.9, 56.5, 37.9, 32.4, 28.7, 28.2, 22.3. IR (thin film, cm<sup>-1</sup>): 2933, 2854, 1707, 1436, 1395, 1367, 1188, 1112, 1063, 860, 887, 751, 719, 635 and 530 cm<sup>-1</sup>. HRMS (DART-TOF) calculated for C<sub>20</sub>H<sub>22</sub>NO<sub>3</sub>S<sup>+</sup> [M+H]<sup>+</sup> m/z 356.1315, found 356.1315.

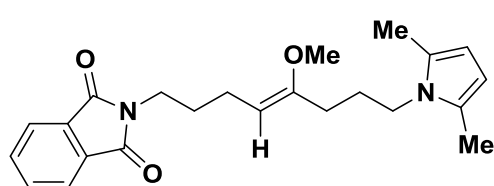

(Z)-2-(8-(2,5-dimethyl-1H-pyrrol-1-yl)-5-methoxyoct-4-en-1-yl)isoindoline-1,3-dione (12k)

The product **12k** was prepared following **General Procedure** at 0.2 mmol scale, purification by flash chromatography (SiO<sub>2</sub>, petroleum ether: EtOAc = 1:0 to 10:1) afforded the title product as a yellow oil (41.8 mg, 0.11 mmol, 55%).

<sup>1</sup>H NMR (400 MHz, CDCl<sub>3</sub>) δ 7.84 – 7.82 (m, 2H), 7.71 – 7.69 (m, 2H), 5.75 (s, 2H), 4.56 (t, *J* = 6.8 Hz, 1H), 3.78 – 3.61 (m, 4H), 3.48 (s, 3H), 2.20 (s, 6H), 2.16 – 2.08 (m, 4H), 1.79 – 1.66 (m, 4H). <sup>13</sup>C NMR (101 MHz, CDCl<sub>3</sub>) δ 168.5, 154.6, 133.9, 132.3, 127.4, 123.2, 109.1, 105.2, 56.4, 43.0, 37.9, 28.8, 28.6, 28.2, 22.3, 12.6. IR (thin film, cm<sup>-1</sup>): 2924, 2853, 2246, 1676, 1641, 1456, 1262, 1206, 1115, 1053, 994, 909, 805, 748 and 637 cm<sup>-1</sup>. HRMS (DART-TOF) calculated for C<sub>23</sub>H<sub>29</sub>N<sub>2</sub>O<sub>3</sub><sup>+</sup> [M+H]<sup>+</sup> *m/z* 381.2173, found 381.2173.

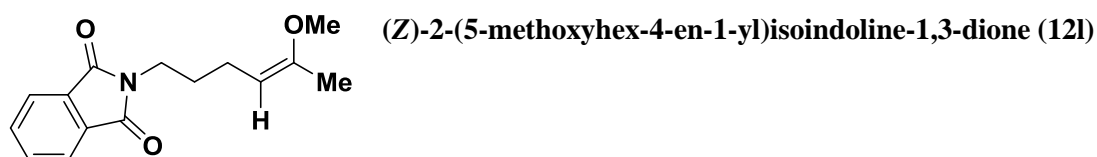

The product **12l** was prepared following **General Procedure** at 0.2 mmol scale, purification by flash chromatography (SiO<sub>2</sub>, petroleum ether: EtOAc = 1:0 to 10:1) afforded the title product as a colorless oil (20.7 mg, 0.08 mmol, 43%). (We noted this compound tend to undergo *E/Z* isomerization on column at high temperature.)

<sup>1</sup>H NMR (400 MHz, CDCl<sub>3</sub>) δ 7.83 (dd, *J* = 5.2, 3.2 Hz, 2H), 7.70 (dd, *J* = 5.2, 3.2 Hz, 2H), 4.41 (t, *J* = 7.2 Hz, 1H), 3.68 (t, *J* = 7.6 Hz, 2H), 3.52 (s, 3H), 2.17 – 2.02 (m, 2H), 1.79 (s, 3H), 1.74 – 1.68 (m, 2H). <sup>13</sup>C NMR (101 MHz, CDCl<sub>3</sub>) δ 168.5, 151.7, 133.9, 132.4, 123.2, 106.7, 55.5, 37.9, 28.7, 22.1, 17.4. IR (thin film, cm<sup>-1</sup>): 2940, 2860, 1707, 1437, 1396, 1367, 1170, 1121, 1048, 888, 795, 719, 625 and 530 cm<sup>-1</sup>. HRMS (DART-TOF) calculated for C<sub>15</sub>H<sub>17</sub>NNaO<sub>3</sub><sup>+</sup> [M+Na]<sup>+</sup> *m/z* 282.1101, found 282.1106.

## 7. Characterization Data for Products in Table 3

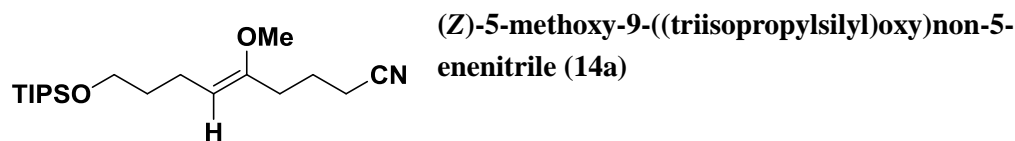

The product **14a** was prepared following **General Procedure** at 0.2 mmol scale, purification by flash chromatography (SiO<sub>2</sub>, petroleum ether: EtOAc = 1:0 to 10:1) afforded the title product as a colorless oil (39.3 mg, 0.12 mmol, 58%).

<sup>1</sup>H NMR (400 MHz, CDCl<sub>3</sub>) δ 4.64 (t, *J* = 7.2 Hz, 1H), 3.68 (t, *J* = 6.4 Hz, 2H), 3.52 (s, 3H), 2.35 (t, *J* = 7.2 Hz, 2H), 2.26 (t, *J* = 7.2 Hz, 2H), 2.14 (dd, *J* = 14.8, 7.6 Hz, 2H), 1.79 (p, *J* = 7.2 Hz, 2H), 1.61 – 1.55 (m, 2H), 1.08 – 1.04 (m, 21H). <sup>13</sup>C NMR (101 MHz, CDCl<sub>3</sub>) δ 152.8, 119.7, 112.6, 63.2, 57.0, 33.4, 30.3, 22.9, 21.4, 18.2, 16.3, 12.2. IR (thin film, cm<sup>-1</sup>): 2942, 2866, 2246, 1676, 1462, 1260, 1104, 1070, 883, 750 and 682 cm<sup>-1</sup>. HRMS (DART-TOF) calculated for C<sub>19</sub>H<sub>37</sub>NNaO<sub>2</sub>Si<sup>+</sup>[M+Na]<sup>+</sup> m/z 362.2486, found 362.2489.

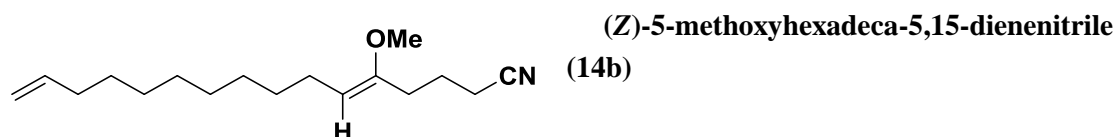

The product **14b** was prepared following **General Procedure** at 0.2 mmol scale, purification by flash chromatography (SiO<sub>2</sub>, petroleum ether: EtOAc = 1:0 to 10:1) afforded the title product as a yellow oil (31.6 mg, 0.12 mmol, 60%).

<sup>1</sup>H NMR (400 MHz, CDCl<sub>3</sub>) δ 5.81 (ddt, *J* = 16.8, 10.4, 6.8 Hz, 1H), 4.99 (dd, *J* = 17.2, 1.6 Hz, 1H), 4.93 (dd, *J* = 10.0, 0.8 Hz, 1H), 4.61 (t, *J* = 7.2 Hz, 1H), 3.51 (s, 3H), 2.36 (t, *J* = 7.2 Hz, 2H), 2.26 (t, *J* = 7.2 Hz, 2H), 2.09 – 2.02 (m, 4H), 1.79 (p, *J* = 7.2 Hz, 2H), 1.43 – 1.34 (m, 2H), 1.28 (s, 10H). <sup>13</sup>C NMR (101 MHz, CDCl<sub>3</sub>) δ 152.4, 139.4, 119.7, 114.2, 113.3, 57.0, 33.9, 30.2, 30.0, 29.6, 29.5, 29.5, 29.2, 29.0, 24.9, 22.9, 16.3. IR (thin film, cm<sup>-1</sup>): 2925, 2853, 2246, 1676, 1641, 1457, 1262, 1115, 1075, 994 and 751 cm<sup>-1</sup>. HRMS (DART-TOF) calculated for C<sub>17</sub>H<sub>29</sub>NNaO<sup>+</sup> [M+Na]<sup>+</sup> m/z 286.2141, found 286.2144.

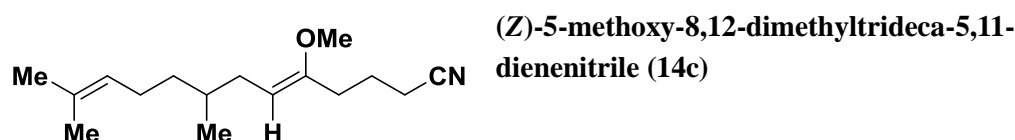

The product **14c** was prepared following **General Procedure** at 0.2 mmol scale, purification by flash chromatography (SiO<sub>2</sub>, petroleum ether: EtOAc = 1:0 to 10:1) afforded the title product as a colorless oil (21.4 mg, 0.09 mmol, 43%).

**<sup>1</sup>H NMR (400 MHz, CDCl<sub>3</sub>)** δ 5.09 (t, *J* = 7.2 Hz, 1H), 4.62 (t, *J* = 7.2 Hz, 1H), 3.50 (s, 3H), 2.36 (t, *J* = 7.2 Hz, 2H), 2.28 (t, *J* = 7.2 Hz, 2H), 2.11 – 1.88 (m, 4H), 1.80 (p, *J* = 7.2 Hz, 2H), 1.68 (s, 3H), 1.60 (s, 3H), 1.44 (td, *J* = 13.2, 6.8 Hz, 1H), 1.38 – 1.30 (m, 1H), 1.15 (td, *J* = 13.6, 7.6 Hz, 1H), 0.87 (d, *J* = 6.4 Hz, 3H). **<sup>13</sup>C NMR (101 MHz, CDCl<sub>3</sub>)** δ 153.0, 131.2, 125.0, 119.7, 111.7, 56.8, 36.9, 33.1, 32.0, 30.2, 25.9, 25.8, 23.0, 19.7, 17.8, 16.3. **IR (thin film, cm<sup>-1</sup>):** 2959, 2925, 2853, 2246, 1675, 1454, 1377, 1204, 1075, 1050, 827, 750 and 735 cm<sup>-1</sup>. **HRMS (DART-TOF)** calculated for C<sub>16</sub>H<sub>27</sub>NNaO<sup>+</sup> [M+Na]<sup>+</sup> *m/z* 272.1985, found 272.1989.

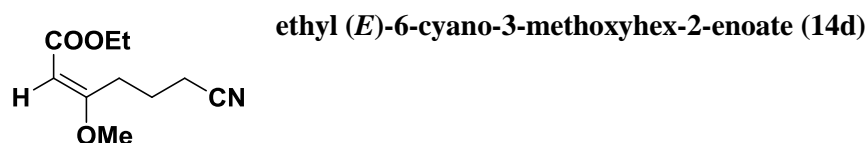

The product **14d** was prepared following **General Procedure** at 0.2 mmol scale, purification by flash chromatography (SiO<sub>2</sub>, petroleum ether: EtOAc = 1:0 to 10:1) afforded the title product as a colorless oil (22.7 mg, 0.11 mmol, 57%).

**<sup>1</sup>H NMR (400 MHz, CDCl<sub>3</sub>)** δ 5.06 (s, 1H), 4.14 (q, *J* = 7.2 Hz, 2H), 3.65 (s, 3H), 2.88 (t, *J* = 7.2 Hz, 2H), 2.38 (t, *J* = 7.6 Hz, 2H), 1.95 (dd, *J* = 14.8, 7.6 Hz, 2H), 1.28 (t, *J* = 7.2 Hz, 3H). **<sup>13</sup>C NMR (101 MHz, CDCl<sub>3</sub>)** δ 173.9, 167.5, 119.6, 92.0, 59.7, 55.7, 30.9, 23.5, 16.8, 14.5. **IR (thin film, cm<sup>-1</sup>):** 2975, 2938, 2853, 2247, 1705, 1621, 1440, 1380, 1262, 1172, 1134, 1053, 969, 823 and 750 cm<sup>-1</sup>. **HRMS (DART-TOF)** calculated for C<sub>10</sub>H<sub>15</sub>NNaO<sub>3</sub><sup>+</sup> [M+Na]<sup>+</sup> *m/z* 220.0944, found 220.0941.

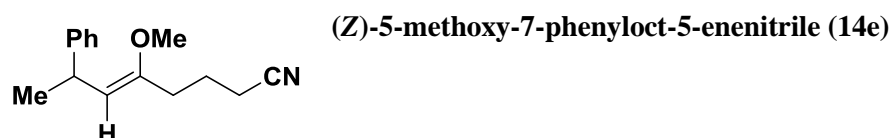

The product **14e** was prepared following **General Procedure** at 0.2 mmol scale, purification by flash chromatography (SiO<sub>2</sub>, petroleum ether: EtOAc = 1:0 to 10:1) afforded the title product as a colorless oil (26.9 mg, 0.12 mmol, 58%).

**<sup>1</sup>H NMR (400 MHz, CDCl<sub>3</sub>)** δ 7.35 – 7.21 (m, 4H), 7.20 – 7.13 (m, 1H), 4.80 (d, *J* = 9.6 Hz, 1H), 3.95 (dq, *J* = 14.4, 7.2 Hz, 1H), 3.51 (s, 3H), 2.29 (dt, *J* = 7.2, 6.4 Hz, 4H), 1.79 (p, *J* = 7.2 Hz, 2H), 1.31 (d, *J* = 7.2 Hz, 3H). **<sup>13</sup>C NMR (101 MHz, CDCl<sub>3</sub>)** δ 151.3, 147.1, 128.5, 126.8, 125.9, 119.6, 118.3, 56.7, 35.2, 29.8, 22.8, 22.6, 16.2. **IR (thin film, cm<sup>-1</sup>):** 3026, 2960, 2839, 2246, 1672, 1601, 1492, 1451, 1329, 1263, 1120 1085, 1062, 911, 801, 759, 736, 700 and 539 cm<sup>-1</sup>. **HRMS (DART-TOF)** calculated for C<sub>15</sub>H<sub>19</sub>NNaO<sup>+</sup> [M+Na]<sup>+</sup> *m/z* 252.1359, found 252.1361.

(Z)-5-methoxy-7,7-dimethyloct-5-enenitrile (**14f**)

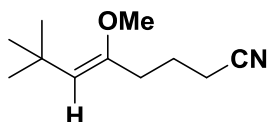

The product **14f** was prepared following **General Procedure** at 0.2 mmol scale, purification by flash chromatography (SiO<sub>2</sub>, petroleum ether: EtOAc = 1:0 to 10:1) afforded the title product as a colorless oil (14.7 mg, 0.08 mmol, 39%).

<sup>1</sup>H NMR (400 MHz, CDCl<sub>3</sub>) δ 4.56 (s, 1H), 3.47 (s, 3H), 2.35 (t, *J* = 7.2 Hz, 2H), 2.23 (t, *J* = 7.2 Hz, 2H), 1.77 (p, *J* = 7.2 Hz, 2H), 1.09 (s, 9H). <sup>13</sup>C NMR (101 MHz, CDCl<sub>3</sub>) δ 151.0, 123.0, 119.8, 55.8, 31.6, 30.8, 30.0, 22.9, 16.1. IR (thin film, cm<sup>-1</sup>): 2953, 2870, 2246, 1667, 1459, 1228, 1131, 1062, 801 and 750 cm<sup>-1</sup>. HRMS (DART-TOF) calculated for C<sub>11</sub>H<sub>19</sub>NNaO<sup>+</sup> [M+Na]<sup>+</sup> *m/z* 204.1359, found 204.1359.

(Z)-6-cyclopropyl-5-methoxyhex-5-enenitrile (**14g**)

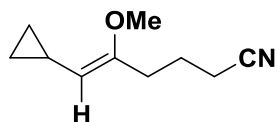

The product **14g** was prepared following **General Procedure** at 0.2 mmol scale, purification by flash chromatography (SiO<sub>2</sub>, petroleum ether: EtOAc = 1:0 to 10:1) afforded the title product as a colorless oil (18.2 mg, 0.11 mmol, 55%).

<sup>1</sup>H NMR (400 MHz, CDCl<sub>3</sub>) δ 4.10 (d, *J* = 9.2 Hz, 1H), 3.62 (s, 3H), 2.36 (t, *J* = 7.2 Hz, 2H), 2.24 (t, *J* = 7.2 Hz, 2H), 1.79 (p, *J* = 7.2 Hz, 2H), 1.72 – 1.62 (m, 1H), 0.75 – 0.66 (m, 2H), 0.32 – 0.23 (m, 2H). <sup>13</sup>C NMR (101 MHz, CDCl<sub>3</sub>) δ 152.7, 119.7, 116.9, 57.3, 30.5, 23.0, 16.4, 7.7, 6.9. IR (thin film, cm<sup>-1</sup>): 3005, 2946, 2247, 1713, 1425, 1168, 1025, 750 and 549 cm<sup>-1</sup>. HRMS (DART-TOF) calculated for C<sub>10</sub>H<sub>15</sub>NNaO<sup>+</sup> [M+Na]<sup>+</sup> *m/z* 188.1046, found 188.1048.

(Z)-6-cyclohexyl-5-methoxyhex-5-enenitrile (**14h**)

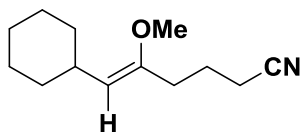

The product **14h** was prepared following **General Procedure** at 0.2 mmol scale, purification by flash chromatography (SiO<sub>2</sub>, petroleum ether: EtOAc = 1:0 to 10:1) afforded the title product as a colorless oil (29.0 mg, 0.14 mmol, 71%).

<sup>1</sup>H NMR (400 MHz, CDCl<sub>3</sub>) δ 4.48 (d, *J* = 9.2 Hz, 1H), 3.51 (s, 3H), 2.46 – 2.38 (m, 1H), 2.35 (t, *J* = 7.2 Hz, 2H), 2.24 (t, *J* = 7.2 Hz, 2H), 1.78 (p, *J* = 7.2 Hz, 2H), 1.72 – 1.56 (m, 5H), 1.37 – 1.23 (m, 2H), 1.21 – 1.12 (m, 1H), 1.08 – 0.96 (m, 2H). <sup>13</sup>C NMR (101 MHz, CDCl<sub>3</sub>) δ 150.9, 119.7, 119.6, 57.1, 34.3, 33.8, 30.0, 26.2, 26.1, 22.9, 16.2. IR (thin film, cm<sup>-1</sup>): 2922, 2848, 2246, 1673, 1338, 1333, 1200, 1116, 1051, 967, 891, 795 and 602 cm<sup>-1</sup>. HRMS (DART-TOF) calculated for C<sub>13</sub>H<sub>21</sub>NNaO<sup>+</sup> [M+Na]<sup>+</sup> *m/z* 230.1519, found 230.1519.

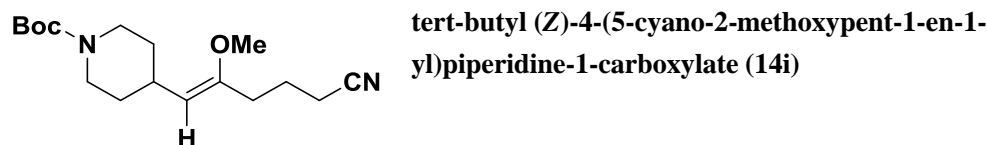

The product **14i** was prepared following **General Procedure** at 0.2 mmol scale, purification by flash chromatography (SiO<sub>2</sub>, petroleum ether: EtOAc = 1:0 to 6:1) afforded the title product as a colorless oil (41.5 mg, 0.13 mmol, 67%).

<sup>1</sup>H NMR (400 MHz, CDCl<sub>3</sub>) δ 4.45 (d, *J* = 8.8 Hz, 1H), 4.12 – 3.92 (m, 2H), 3.53 (s, 3H), 2.76 (t, *J* = 12.0 Hz, 2H), 2.64 – 2.49 (m, 1H), 2.35 (t, *J* = 7.2 Hz, 2H), 2.27 (t, *J* = 7.2 Hz, 2H), 1.83 – 1.75 (m, 2H), 1.63 – 1.53 (m, 2H), 1.46 (s, 9H), 1.26 – 1.16 (m, 2H). <sup>13</sup>C NMR (101 MHz, CDCl<sub>3</sub>) δ 155.0, 152.1, 119.5, 116.8, 79.3, 56.8, 43.9, 32.5, 29.8, 28.6, 22.8, 16.2. IR (thin film, cm<sup>-1</sup>): 2932, 2849, 2245, 1683, 1422, 1365, 1234, 1162, 1121, 1047, 972, 813, 766, 603, 527 and 461 cm<sup>-1</sup>. HRMS (DART-TOF) calculated for C<sub>17</sub>H<sub>28</sub>N<sub>2</sub>NaO<sub>3</sub><sup>+</sup> [M+Na]<sup>+</sup> *m/z* 331.1992, found 331.1996.

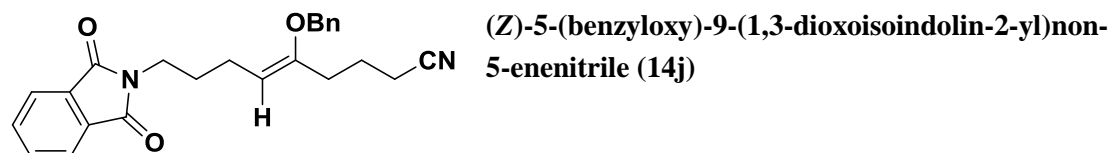

The product **14j** was prepared following **General Procedure** at 0.2 mmol scale, purification by flash chromatography (SiO<sub>2</sub>, petroleum ether: EtOAc = 1:0 to 10:1) afforded the title product as a colorless oil (48.2 mg, 0.12 mmol, 62%). The chemical shift of vinylic proton is close to that of benzylic protons. It is therefore difficult to determine the configuration of this compound by NOE experiments. The stereochemistry is tentatively assigned by analogy to other products.

<sup>1</sup>H NMR (400 MHz, CDCl<sub>3</sub>) δ 7.82 (dd, *J* = 5.6, 3.2 Hz, 2H), 7.70 (dd, *J* = 5.6, 3.2 Hz, 2H), 7.38 – 7.27 (m, 5H), 4.72 (t, *J* = 7.2 Hz, 1H), 4.69 (s, 2H), 3.66 (t, *J* = 7.6 Hz, 2H), 2.37 (t, *J* = 7.2 Hz, 2H), 2.31 (t, *J* = 7.2 Hz, 2H), 2.13 (dd, *J* = 14.8, 7.2 Hz, 2H), 1.81 (p, *J* = 7.2 Hz, 2H), 1.69 (dd, *J* = 14.8, 7.6 Hz, 2H). <sup>13</sup>C NMR (101 MHz, CDCl<sub>3</sub>) δ 168.5, 152.2, 137.5, 134.0, 132.3, 128.6, 128.0, 127.8, 123.2, 119.7, 112.6, 71.0, 37.7, 30.6, 28.6, 22.9, 22.5, 16.3. IR (thin film, cm<sup>-1</sup>): 3464, 2941, 2876, 2247, 1710, 1704, 1667, 1437, 1397, 1371, 1265, 1188, 1041, 907, 797, 721, 529, 449 and 424 cm<sup>-1</sup>. HRMS (DART-TOF) calculated for C<sub>24</sub>H<sub>24</sub>N<sub>2</sub>NaO<sub>3</sub><sup>+</sup> [M+Na]<sup>+</sup> *m/z* 411.1679, found 411.1683.



## 8. The *E/Z* Ratios of the Products in Table 2 and 3

We confirmed the *E/Z* ratios of the products in table 2 and 3 by analysis of the  $^1\text{H}$  NMR spectra of the crude mixture:

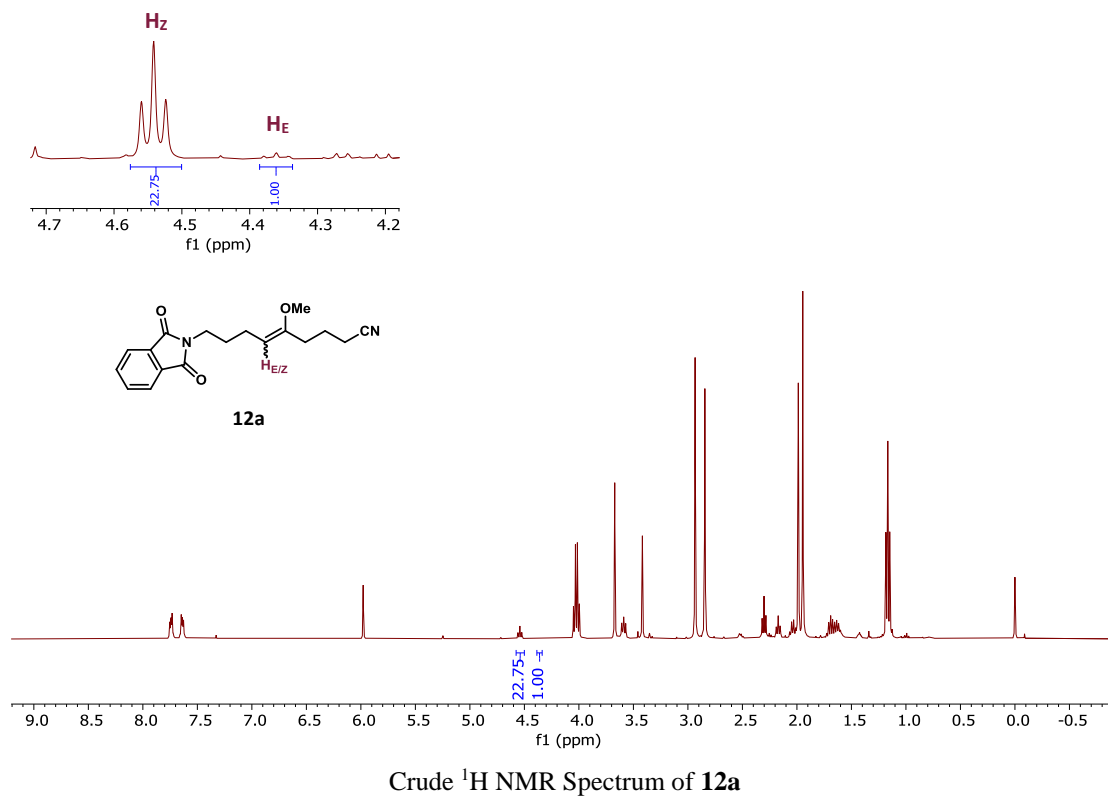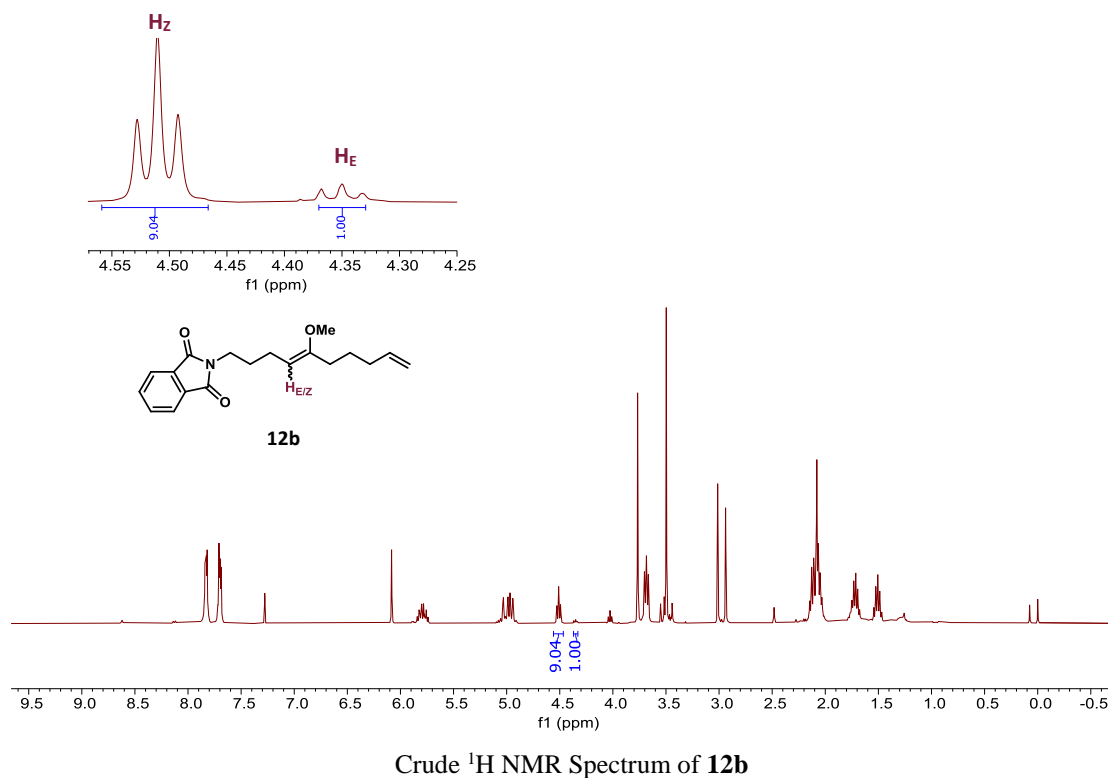

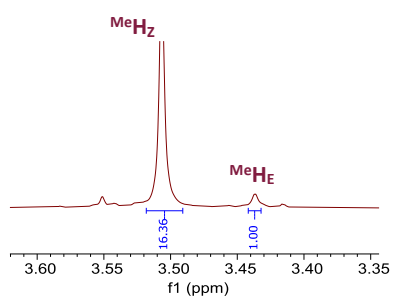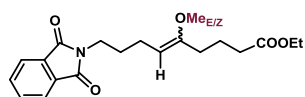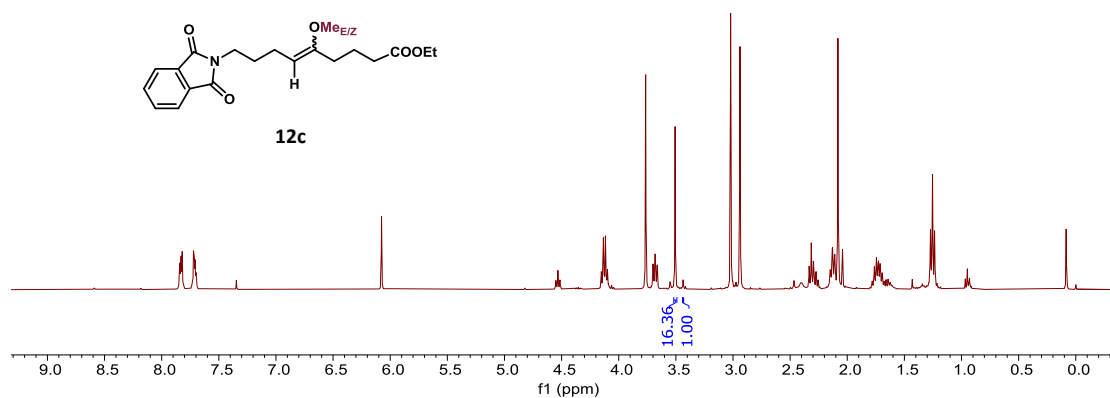

Crude  $^1\text{H}$  NMR Spectrum of **12c**

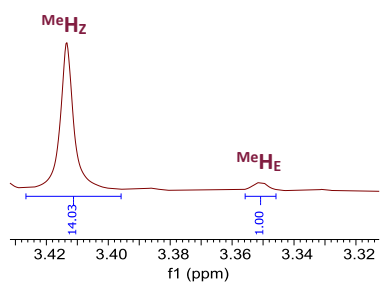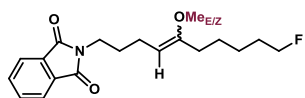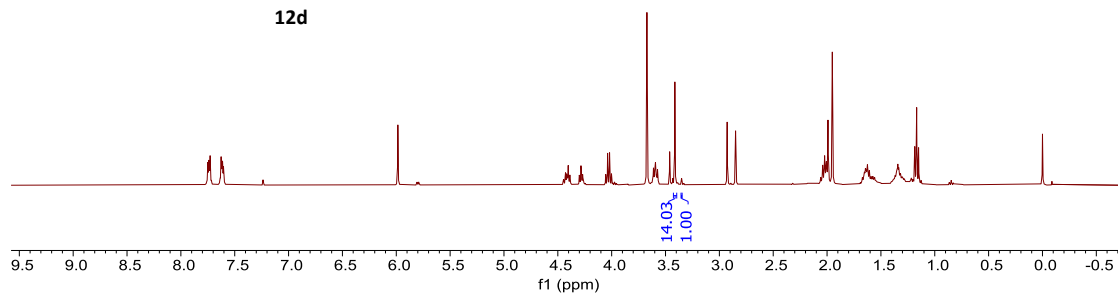

Crude  $^1\text{H}$  NMR Spectrum of **12d**

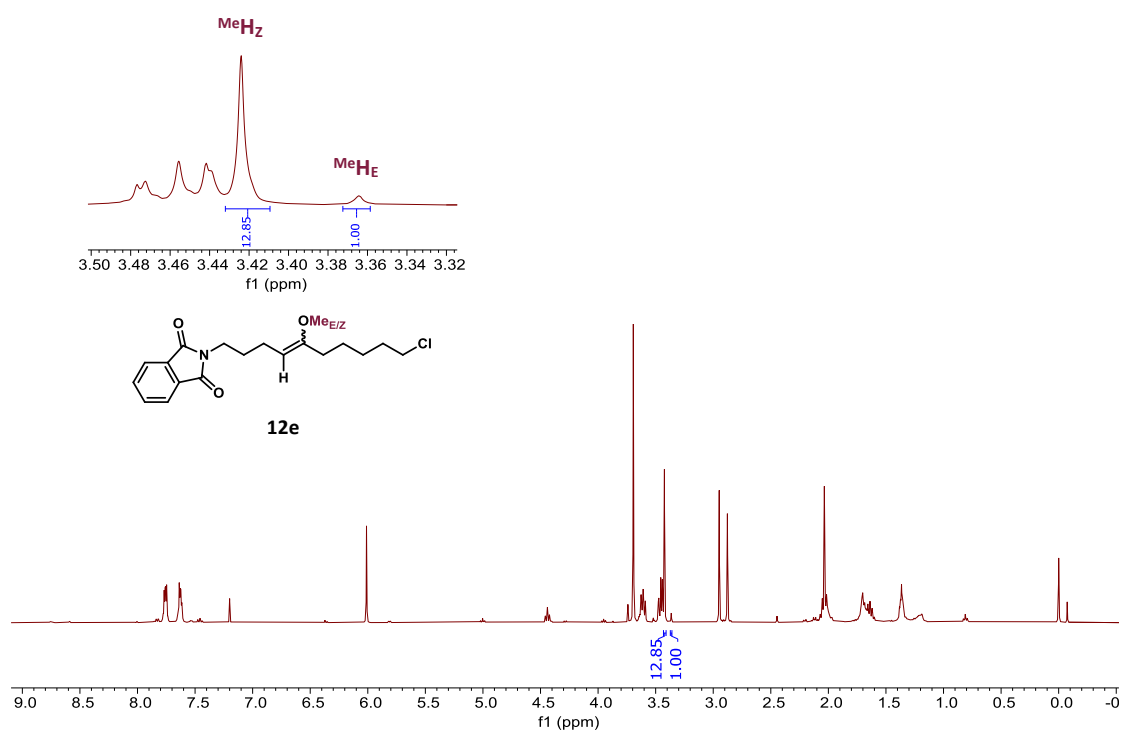

Crude  $^1\text{H}$  NMR Spectrum of **12e**

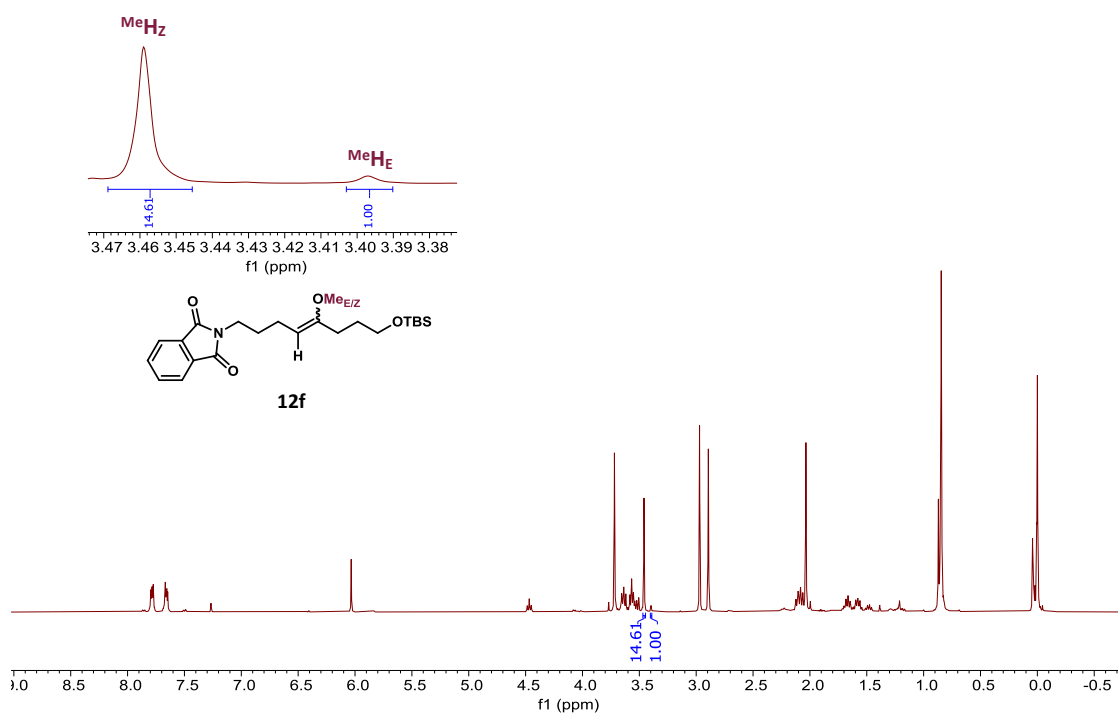

Crude  $^1\text{H}$  NMR Spectrum of **12f**

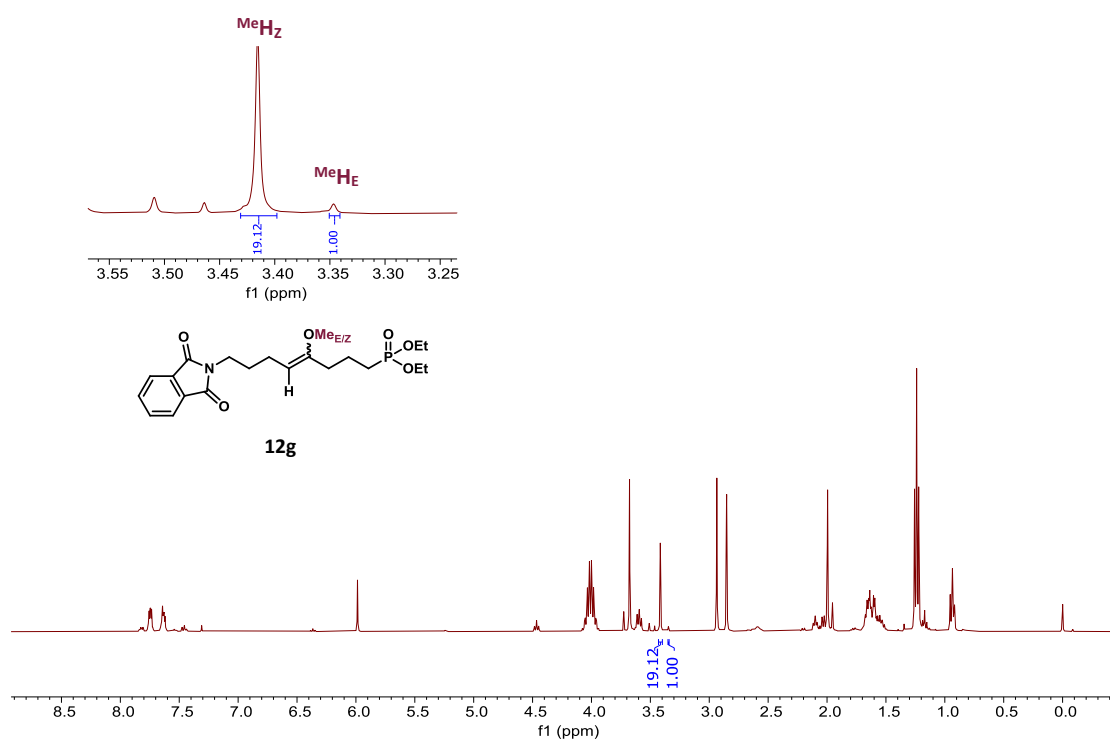

Crude  $^1\text{H}$  NMR Spectrum of **12g**

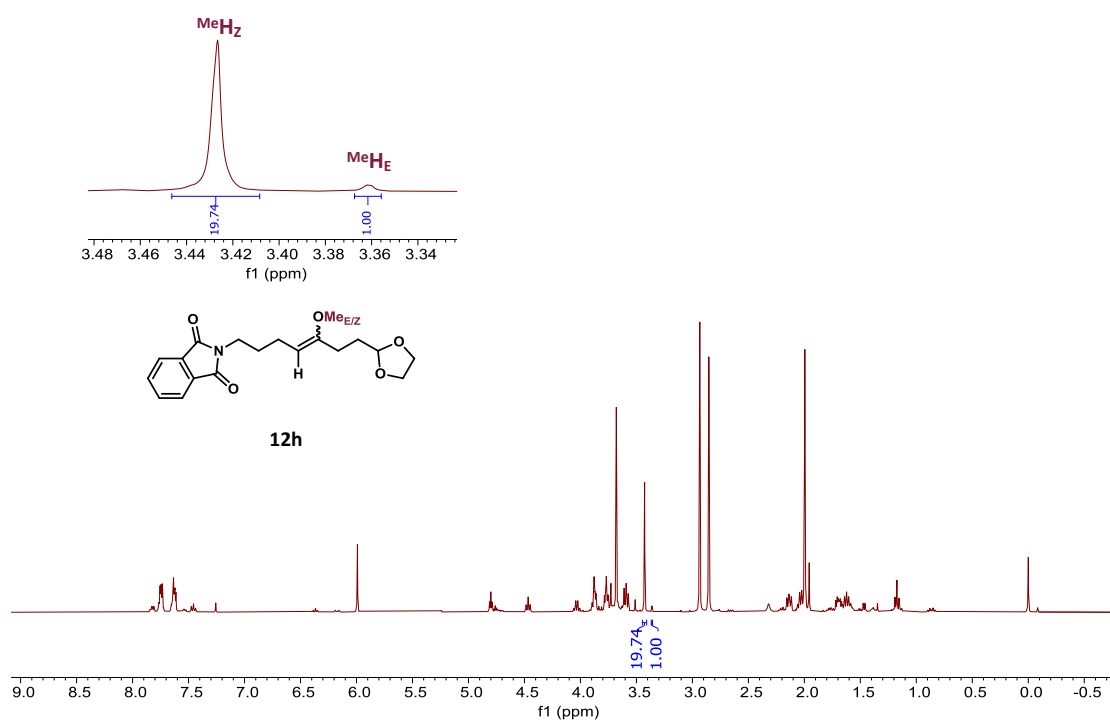

Crude  $^1\text{H}$  NMR Spectrum of **12h**

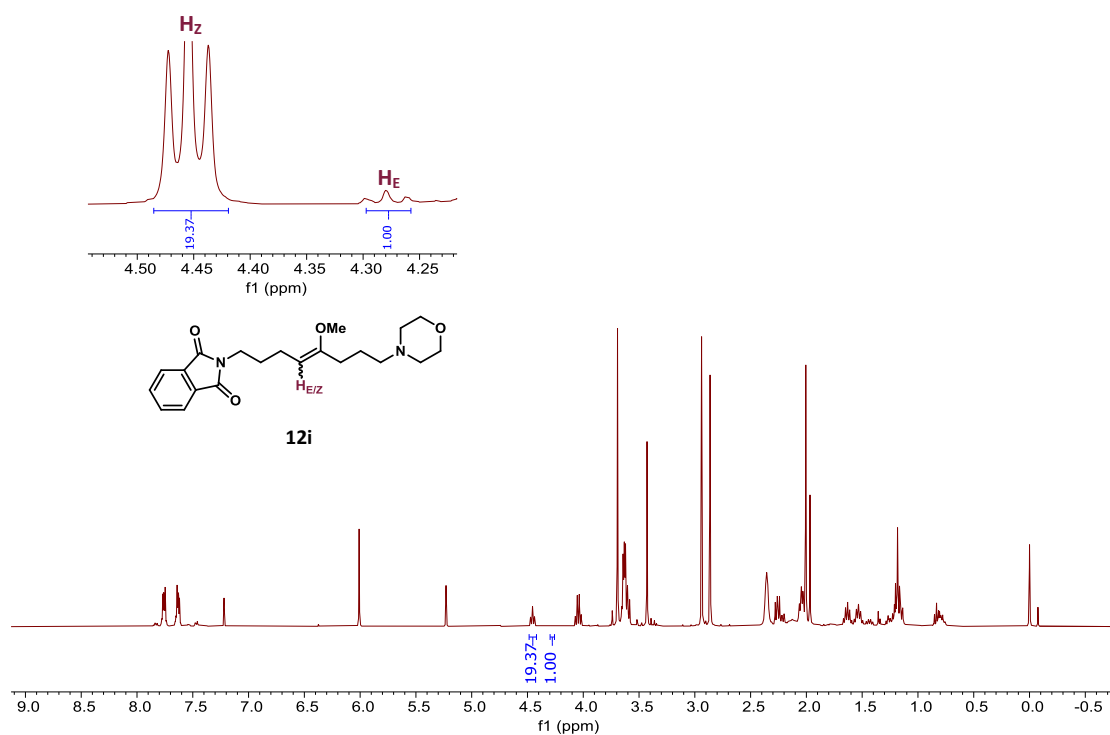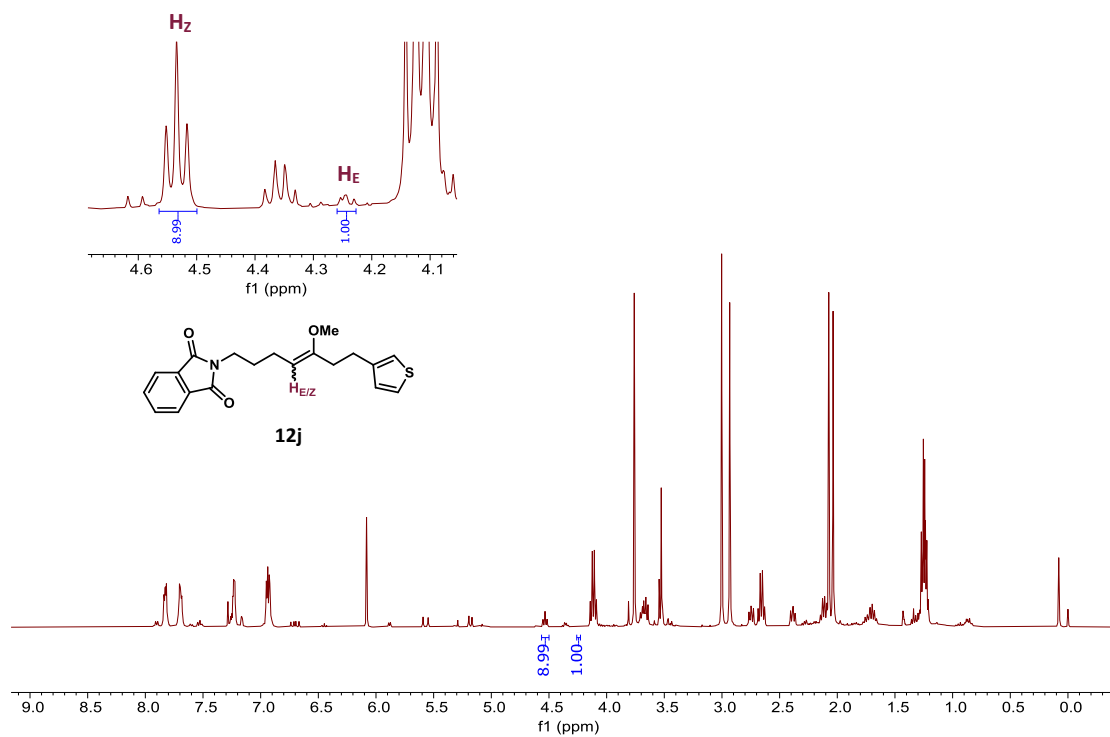

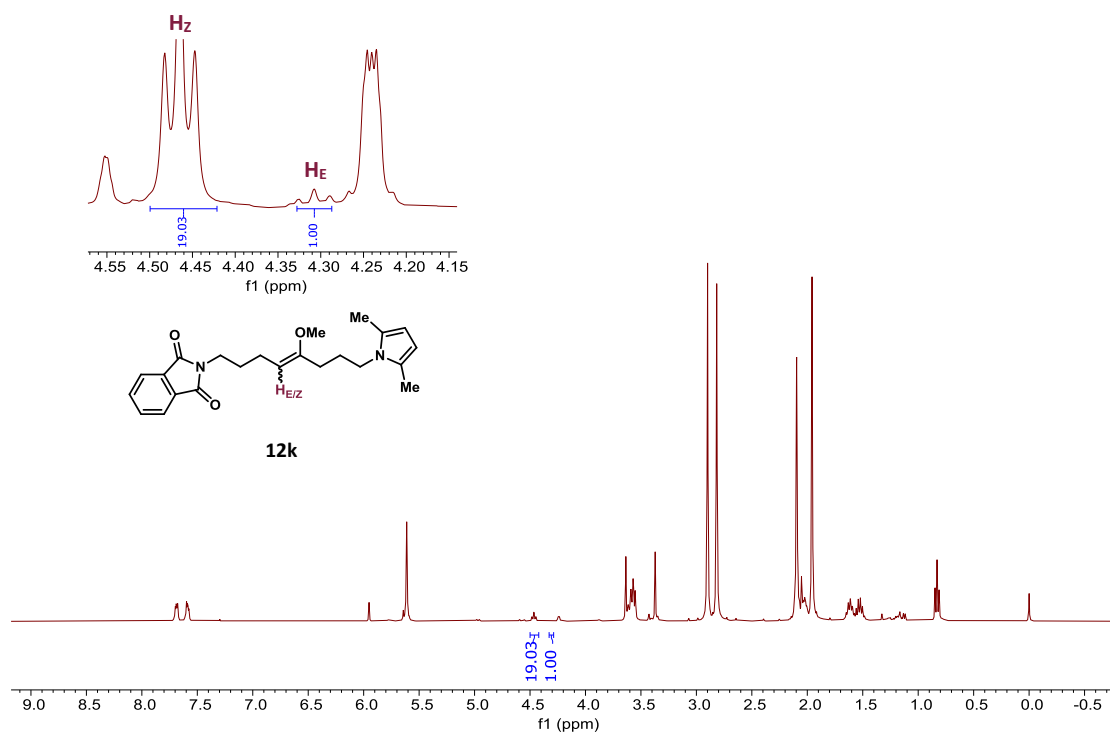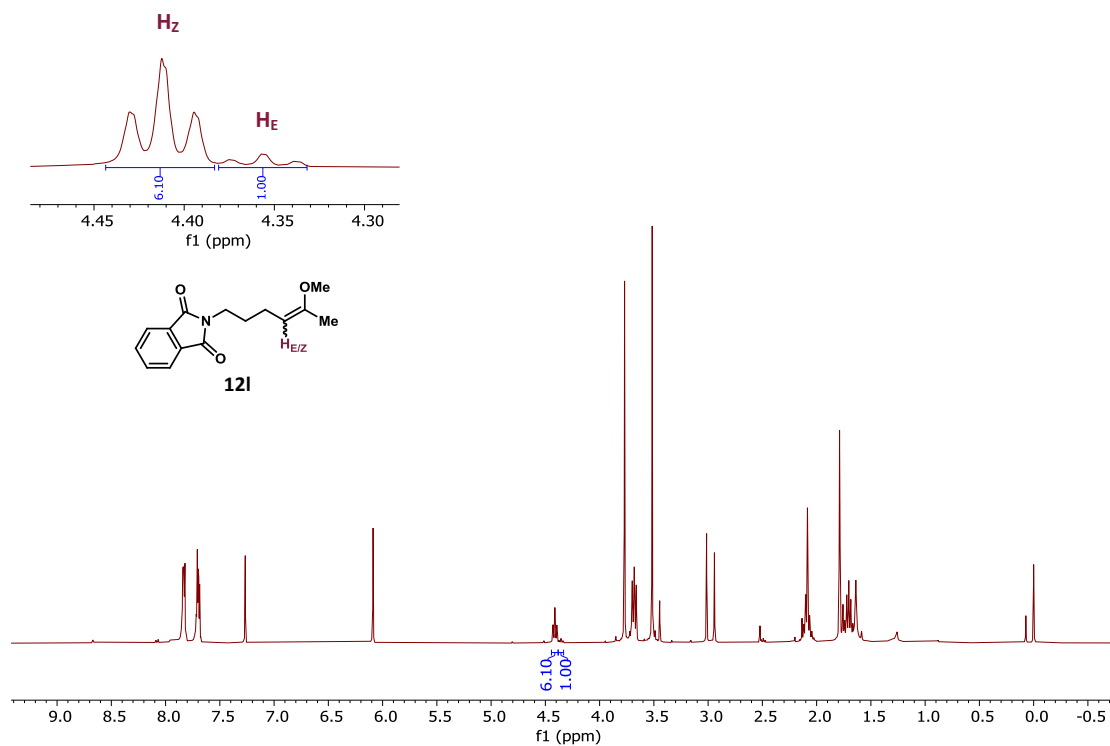

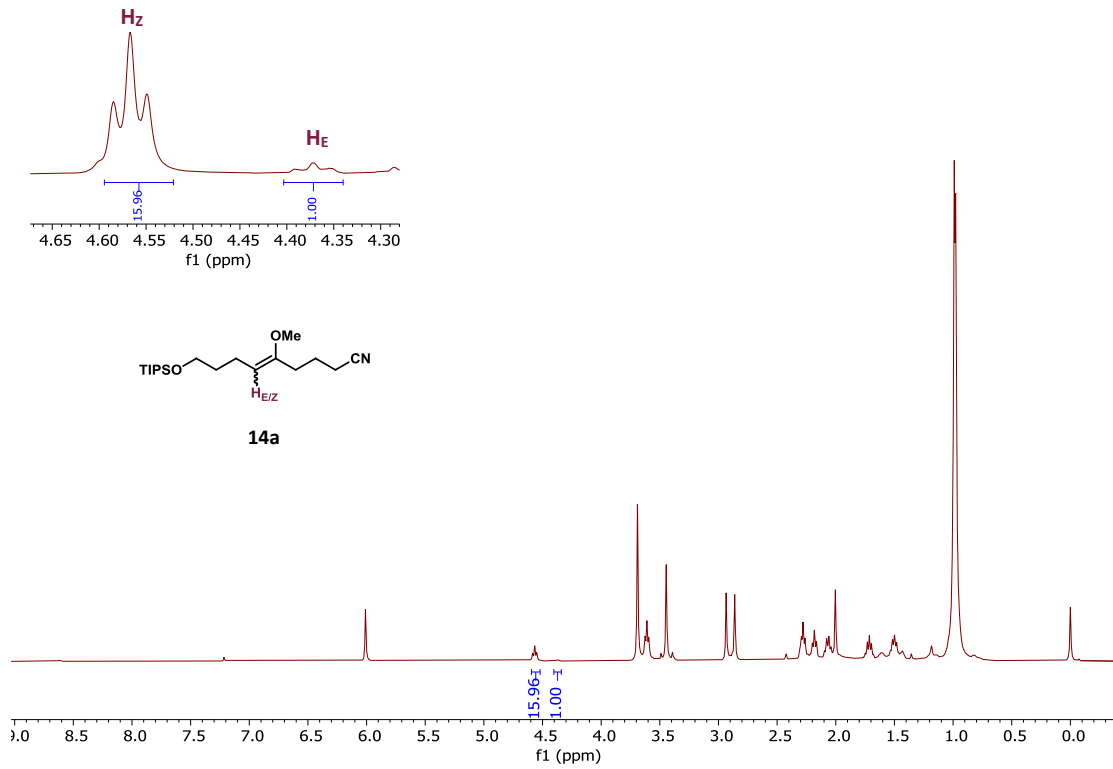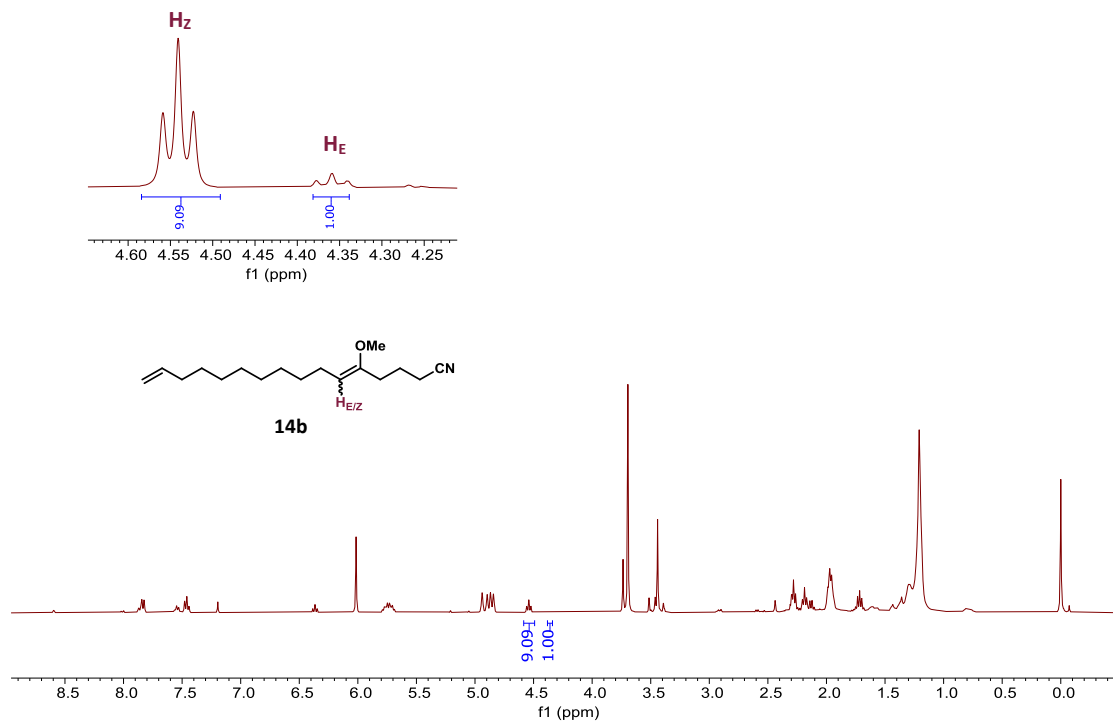

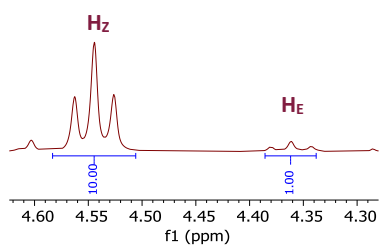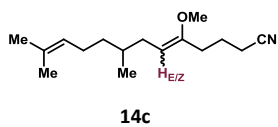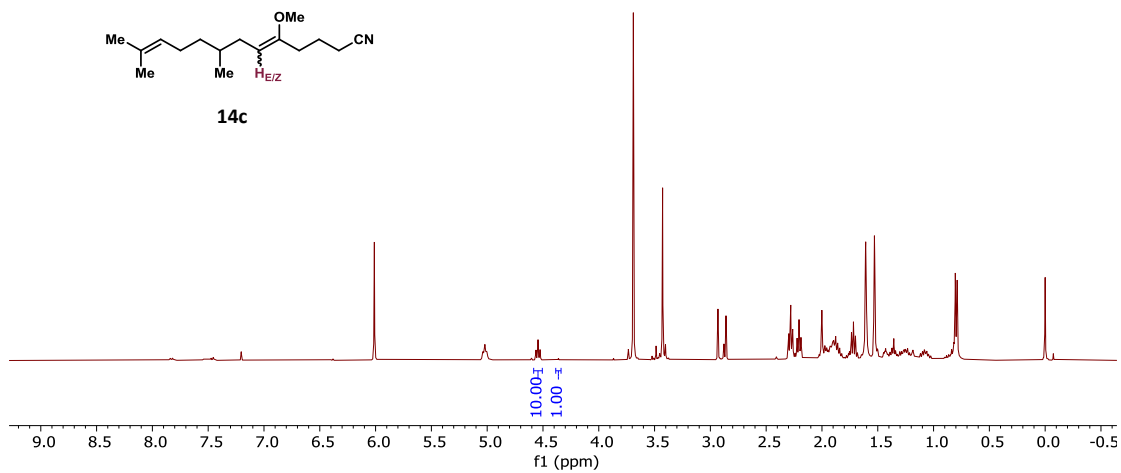

Crude  $^1\text{H}$  NMR Spectrum of **14c**

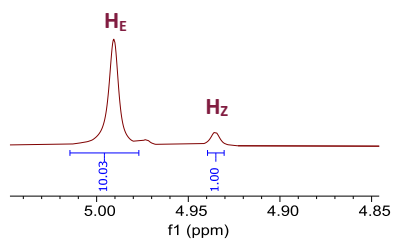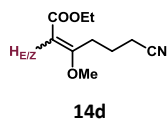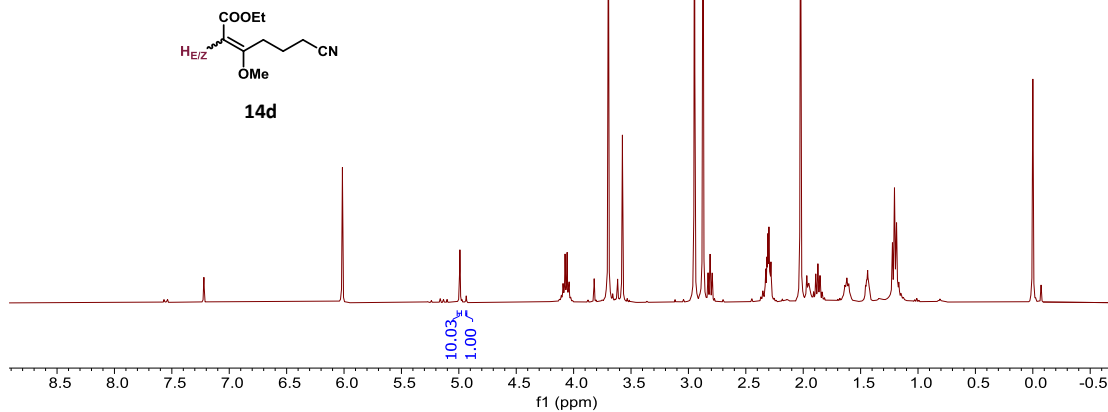

Crude  $^1\text{H}$  NMR Spectrum of **14d**



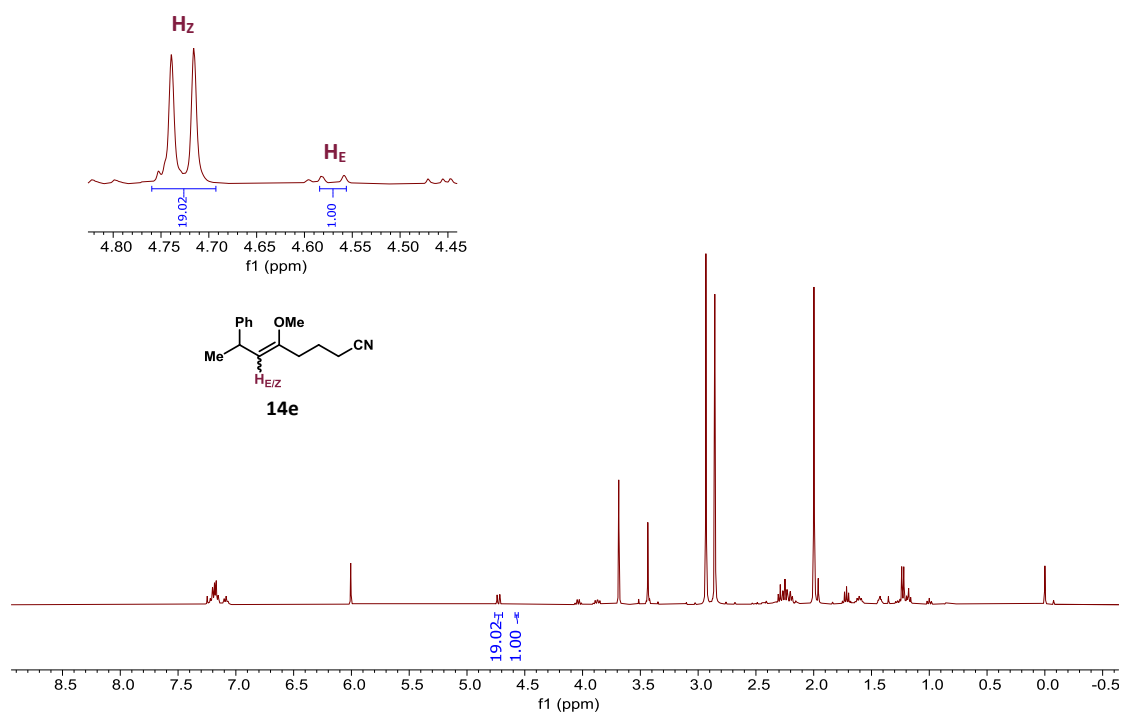

Crude  $^1\text{H}$  NMR Spectrum of **14e**

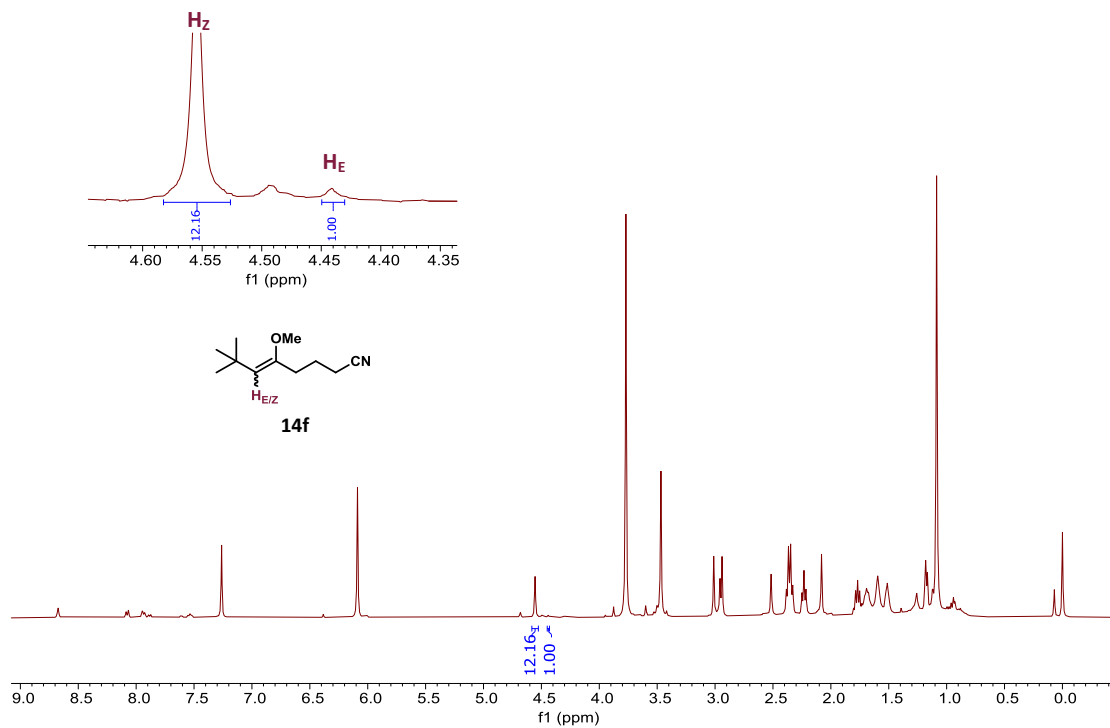

Crude  $^1\text{H}$  NMR Spectrum of **14f**

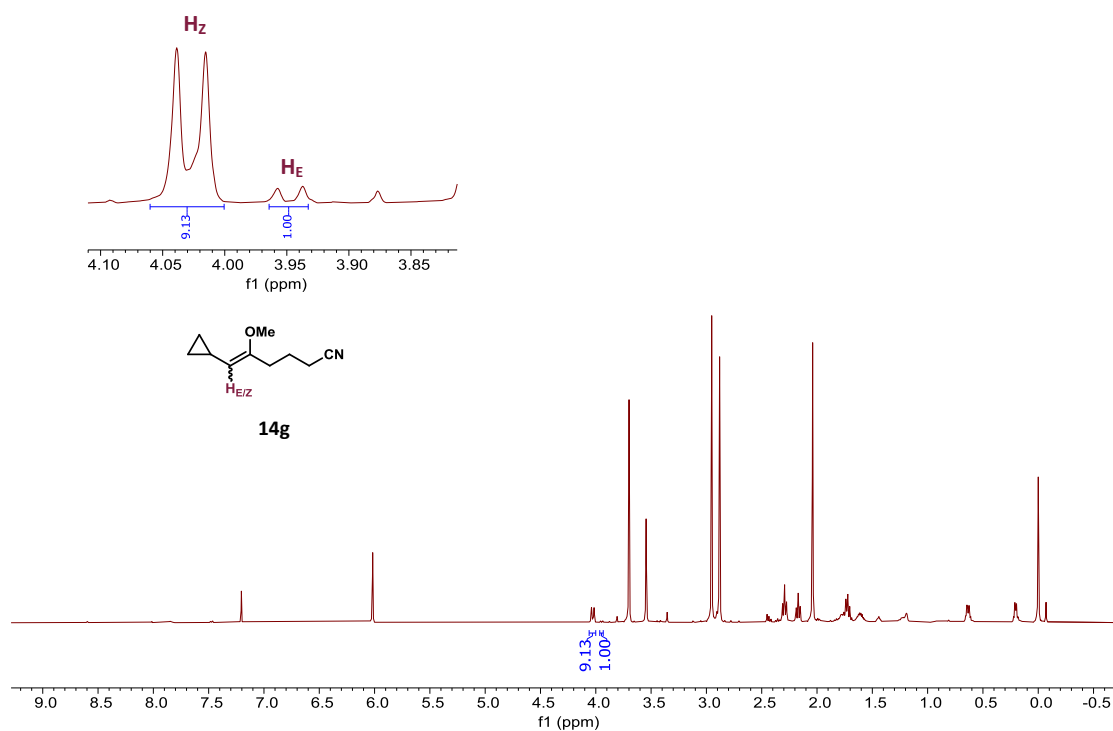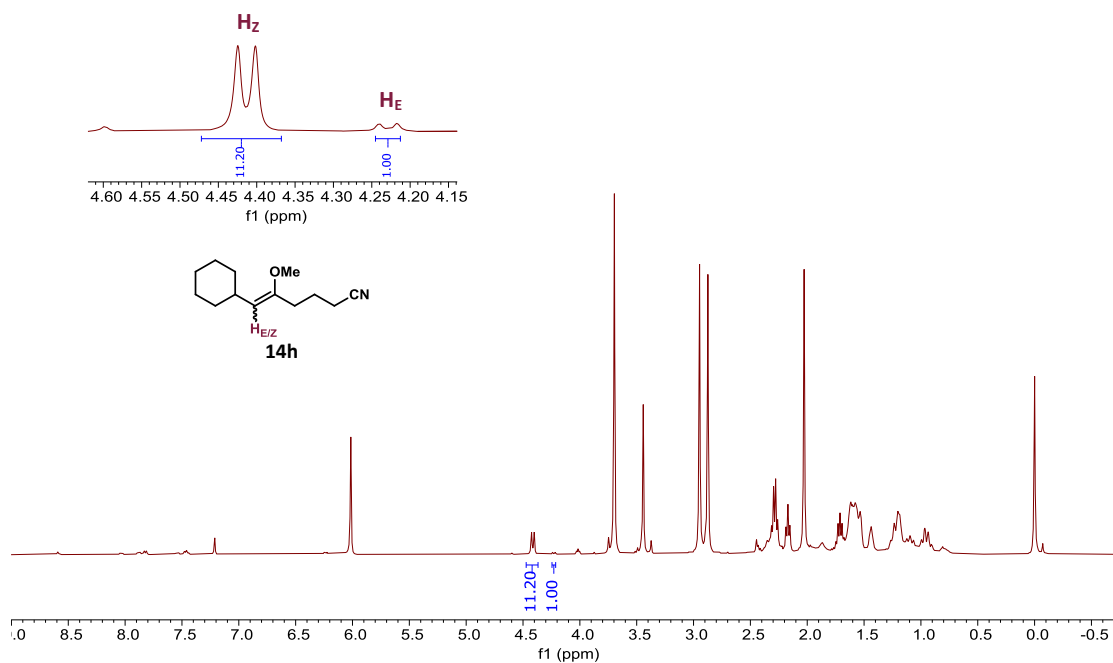

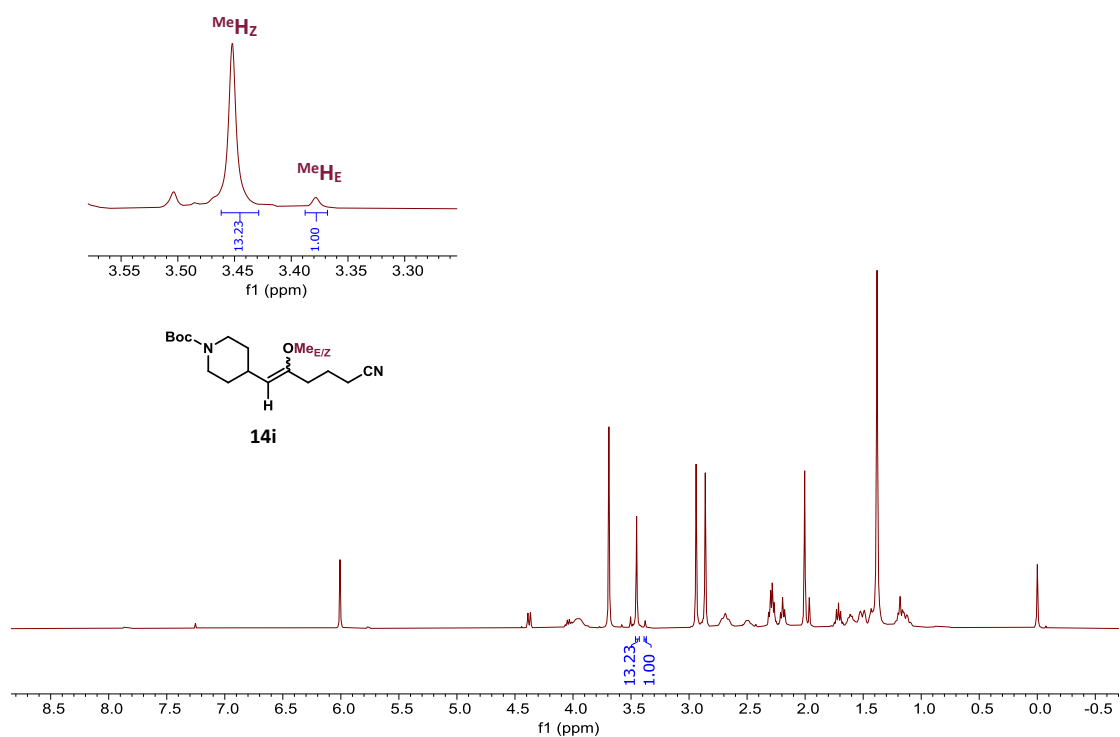

Crude  $^1\text{H}$  NMR Spectrum of **14i**

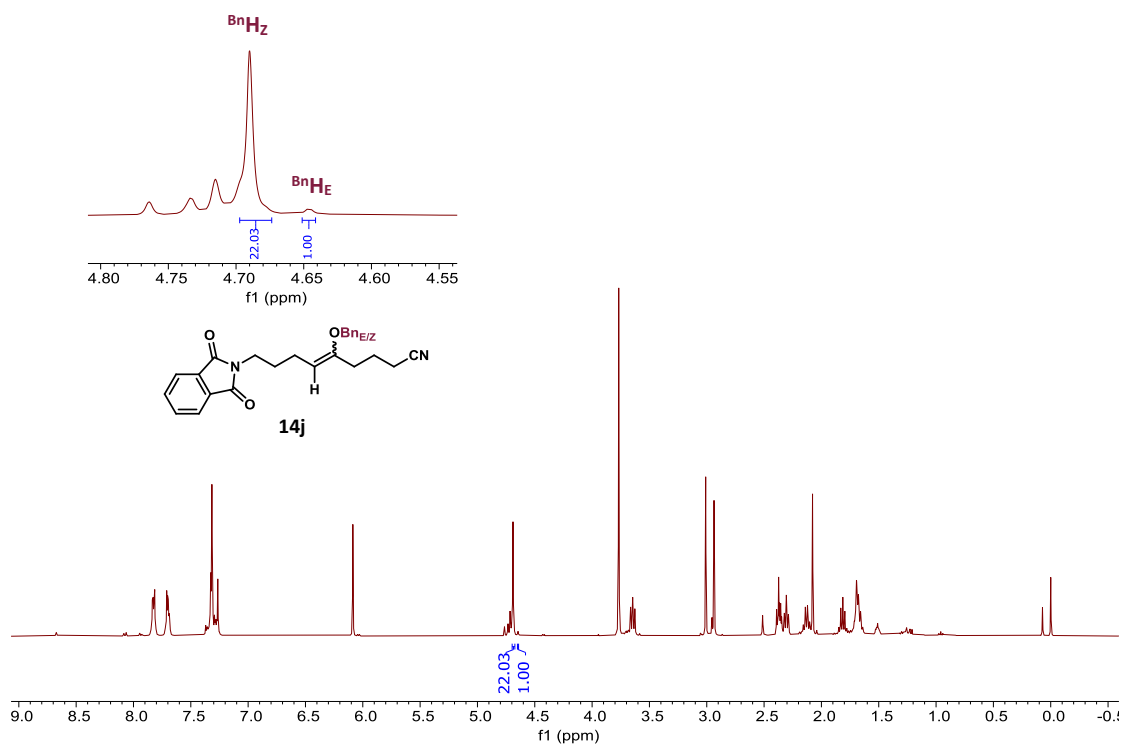

Crude  $^1\text{H}$  NMR Spectrum of **14j**

## 9. References

1. An, L.; Xu, C.; Zhang, X. G. *Nat. Commun.* **2017**, *8*, 1460–1467.
2. Krasovskiy, A.; Knochel, P. *Synthesis* **2006**, *5*, 890–891.
3. Taranekar, P.; Baba, A.; Fulghum, T. M.; Advincula, R. *Macromolecules* **2005**, *38*, 3679–3687.
4. Wellhöfer, I.; Frydenvang, K.; Kotesova, S.; Christiansen, A. M.; Laursen, J. S.; Olsen, C. A. *J. Org. Chem.* **2019**, *84*, 3762–3779.
5. Lee, J. W.; Oh, D. Y. *Synthetic Commun.* **1990**, *20*, 273–277.
6. Phillipson, N.; Anson, M. S.; Taylor, R. J. K. *J. Chem. Soc., Perkin Trans. 1.* **1997**, *0*, 2821–2829.
7. Ohtawa, M.; Yano, K.; Miyao, A.; Hiura, T.; Sugiyama, K.; Arima, S.; Kita, K.; Omura, S.; Nagamitsu, T. *Tetrahedron Letters.* **2019**, *60*, 1037–1042.
8. Finch, H.; Mjalli, A. M. M.; Montana, J. G.; Roberts, S. M.; Taylor, R. J. K. *Tetrahedron* **1990**, *46*, 4925–4950.

## 10. NMR Spectra

CDCl<sub>3</sub>, 400.13 MHz

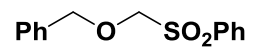

**13-SM1b**

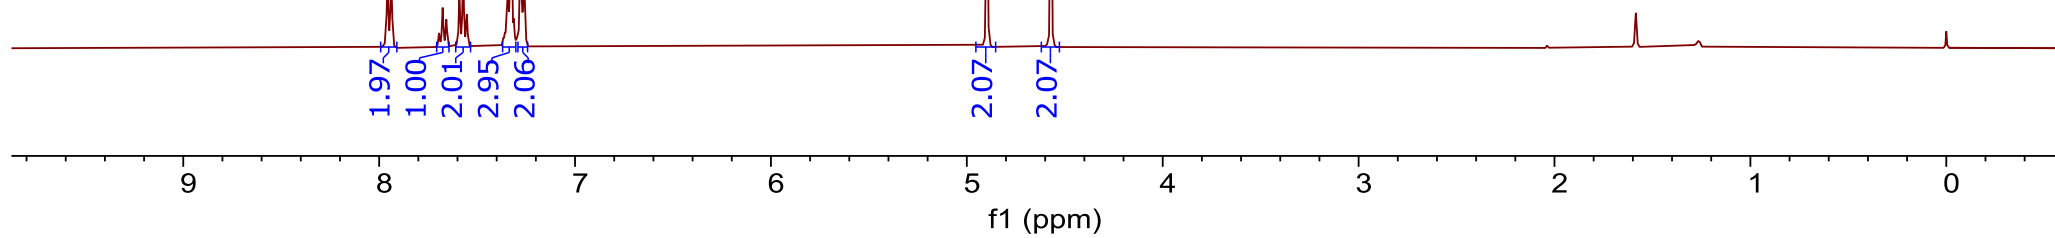

<sup>1</sup>H NMR Spectrum of **13-SM1b**

CDCl<sub>3</sub>, 100.62 MHz

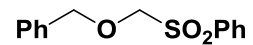

*13-SM1b*

137.30  
135.83  
134.06  
129.20  
128.73  
128.56  
128.38  
128.18

— 84.70

— 74.49

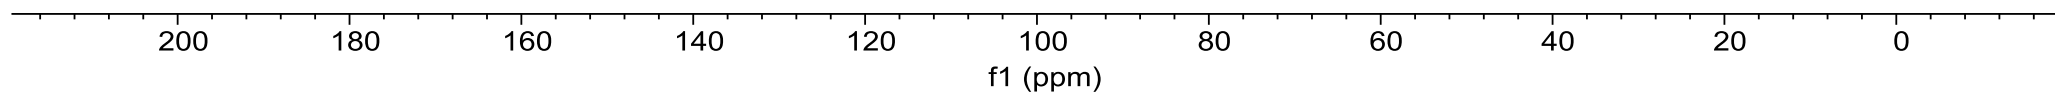

<sup>13</sup>C NMR Spectrum of *13-SM1b*

CDCl<sub>3</sub>, 400.13 MHz

6.47  
6.45  
6.43

3.82

-0.00

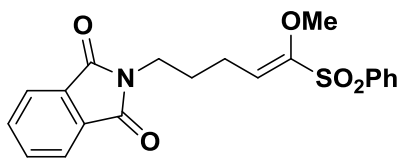

*E*-10

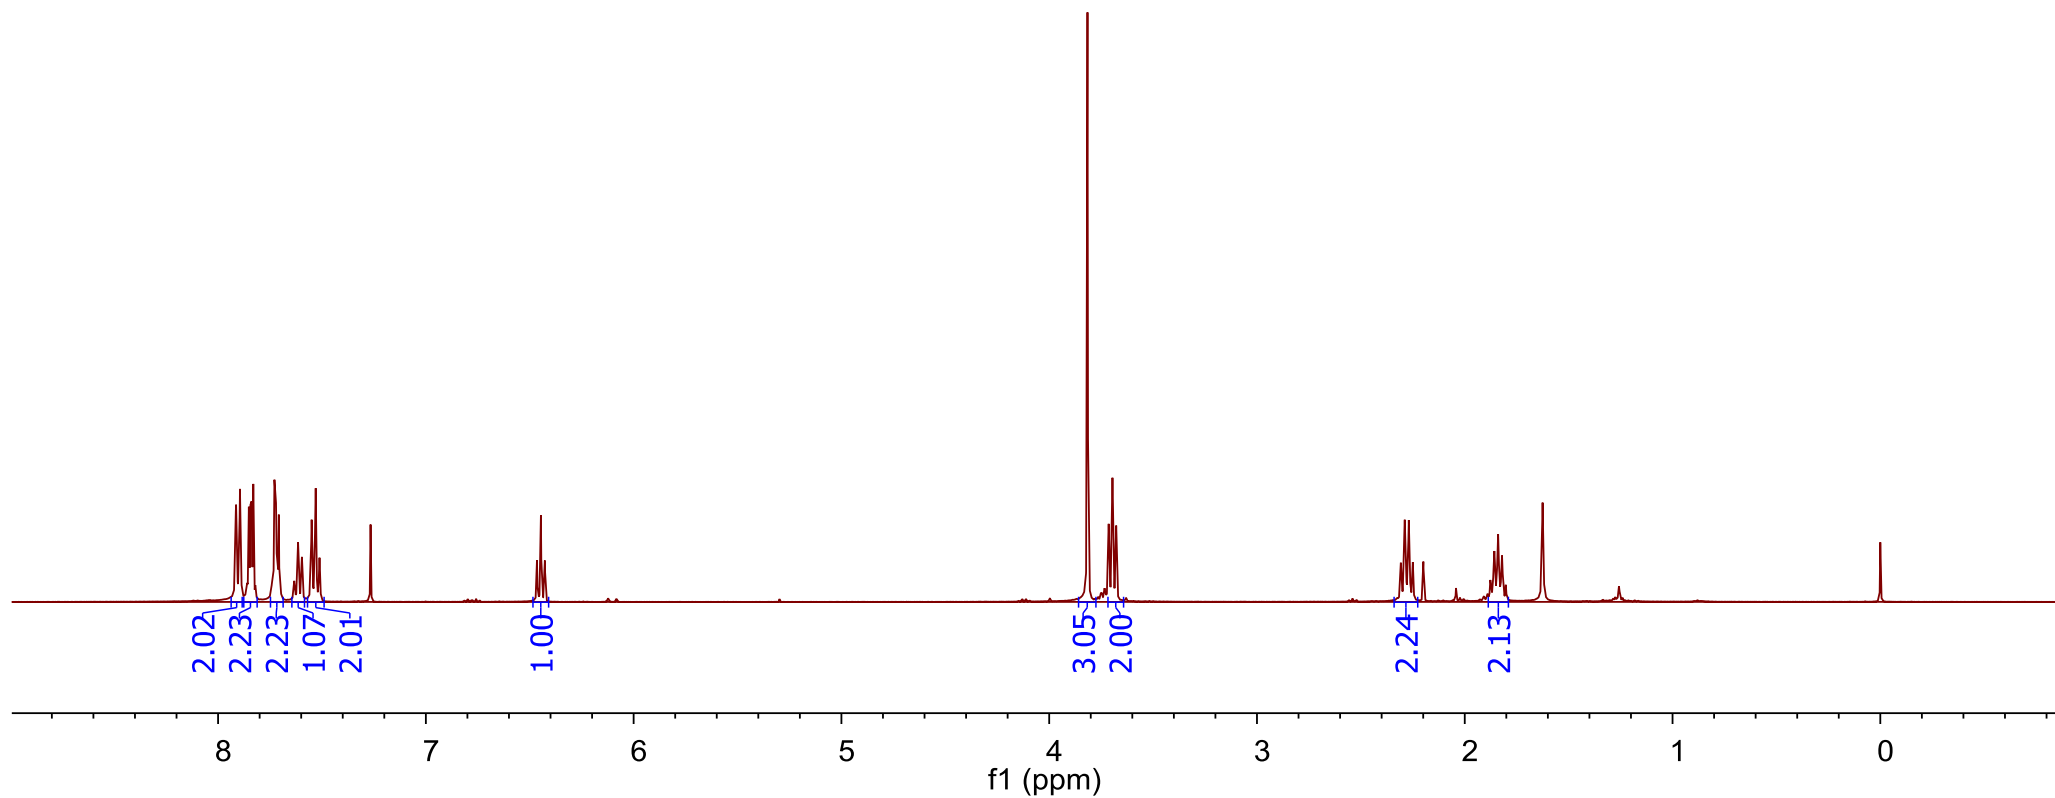

<sup>1</sup>H NMR Spectrum of *E*-10



CDCl<sub>3</sub>, 100.61 MHz

— 168.39  
— 154.45  
139.08  
134.17  
133.66  
132.16  
129.22  
128.41  
125.50  
123.43

— 63.33  
— 37.55  
— 27.66  
— 23.30

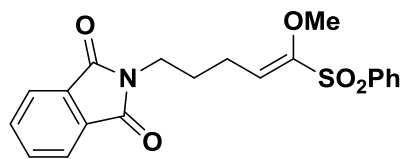

*E*-10

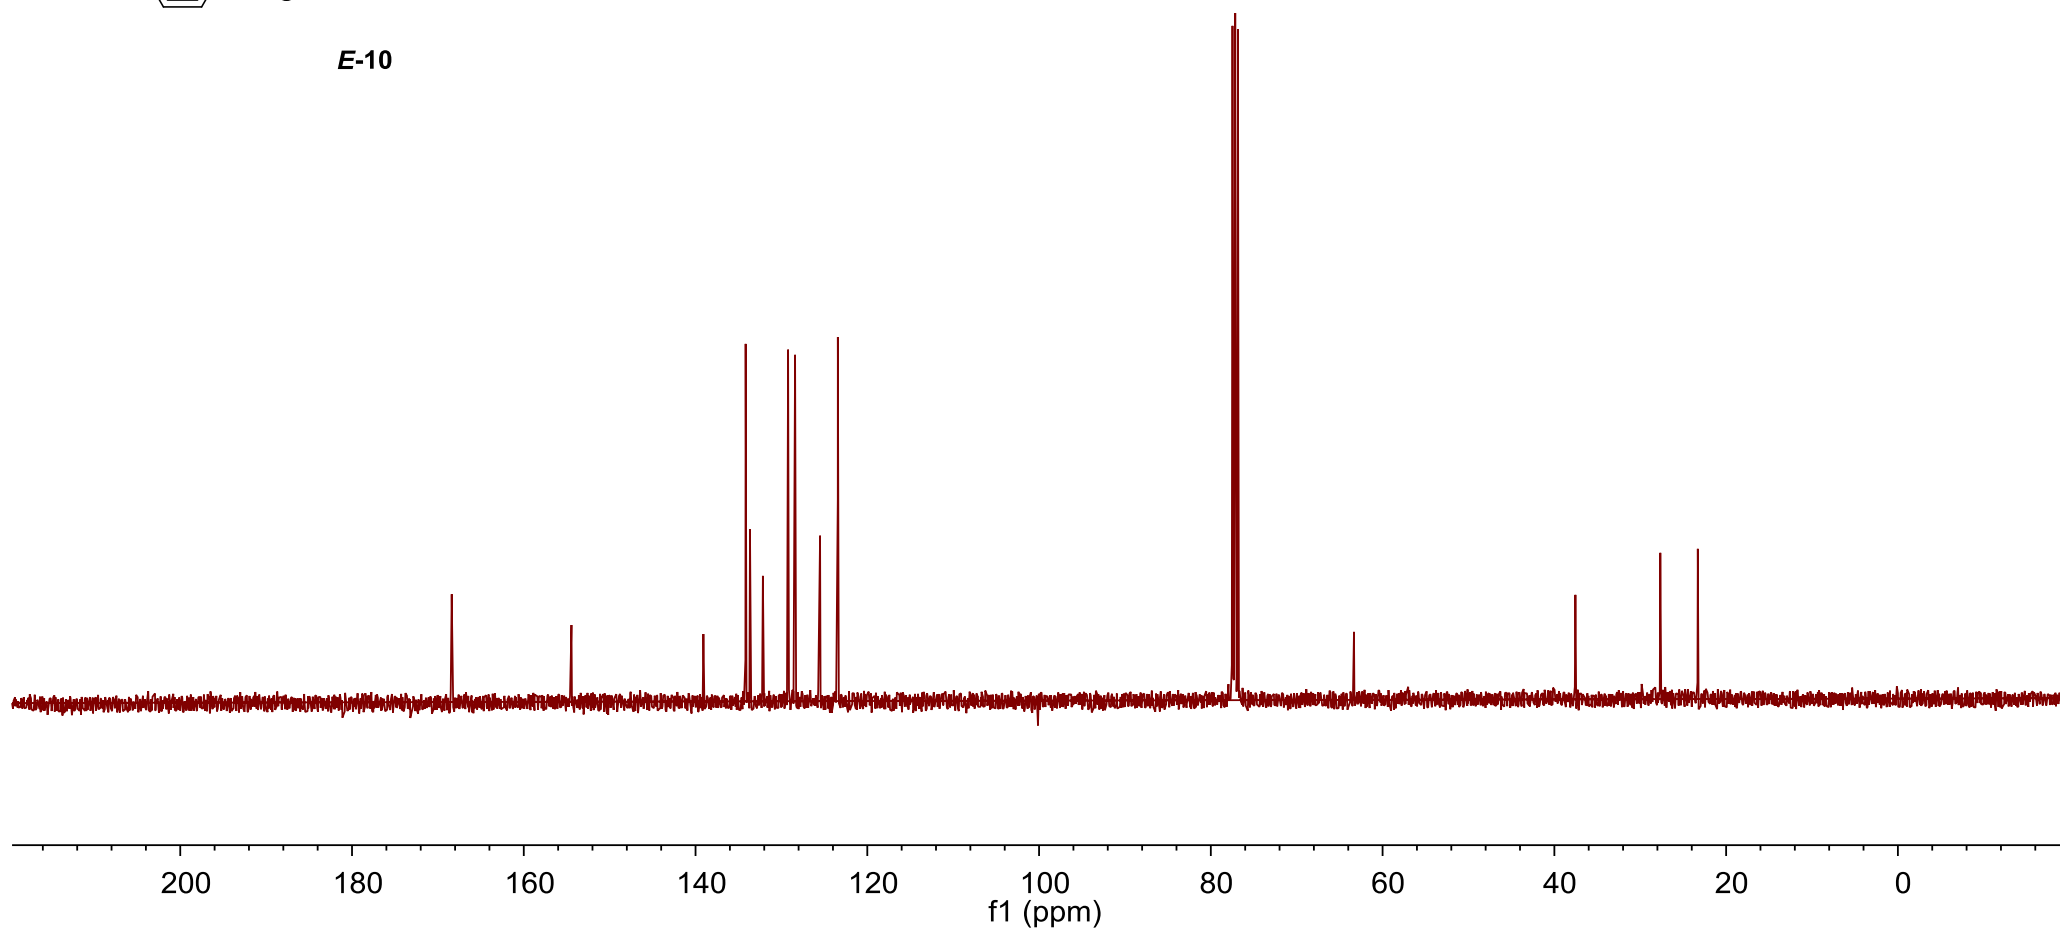

<sup>13</sup>C NMR Spectrum of *E*-10

CDCl<sub>3</sub>, 400.13 MHz

6.47  
6.45  
6.43

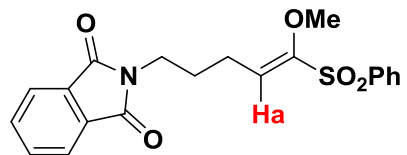

*E*-10

Ha

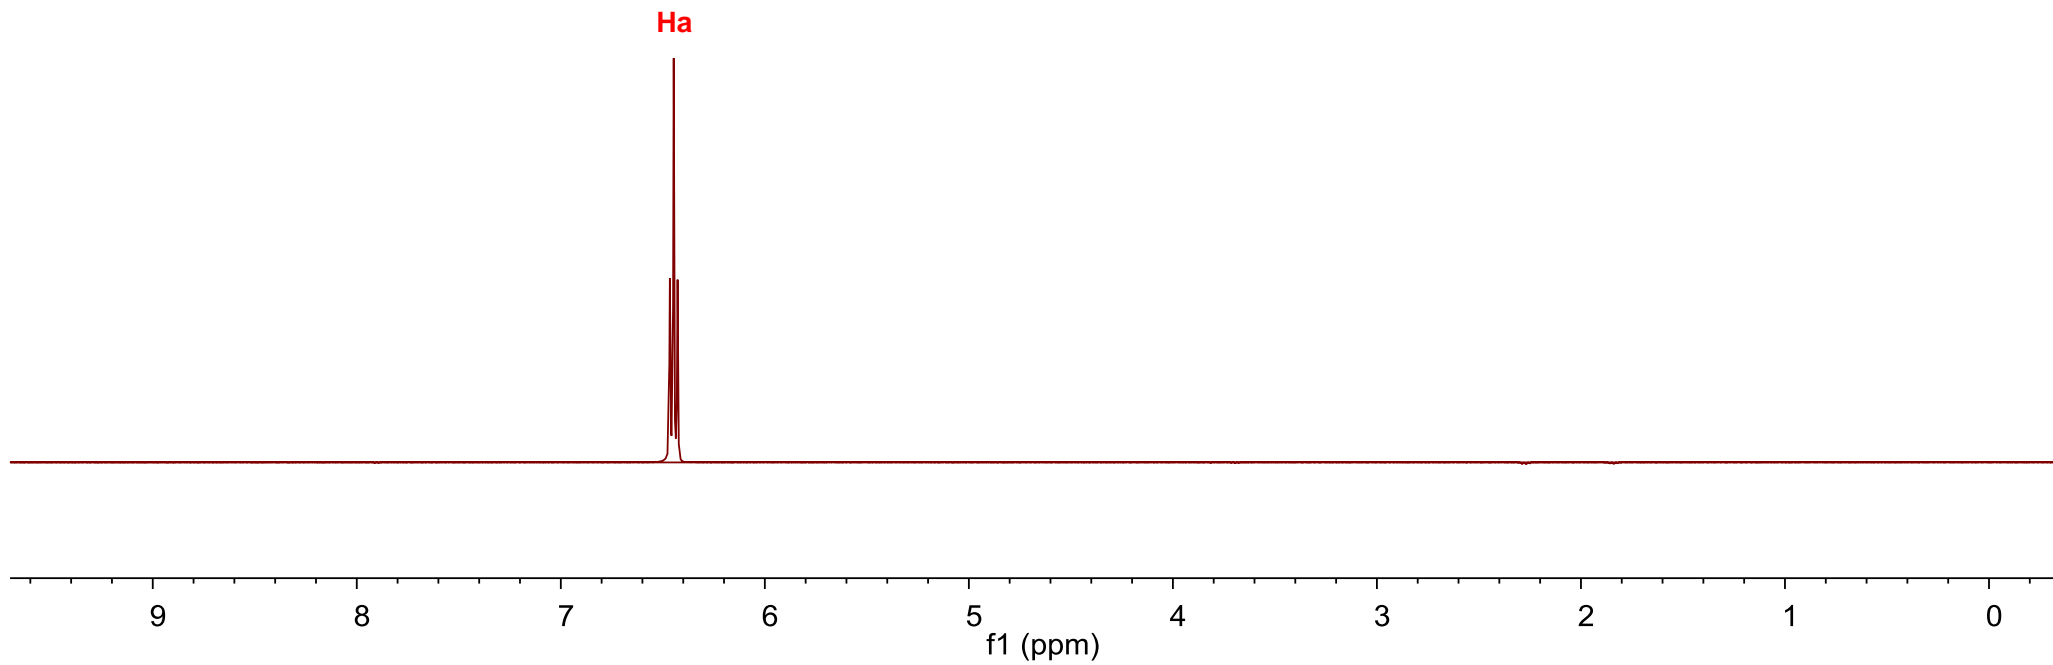

1D-NOE Spectrum of *E*-10

CDCl<sub>3</sub>, 400.13 MHz

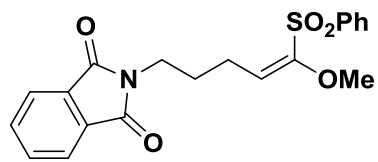

Z-10

5.34  
5.32  
5.30

3.59

0.00

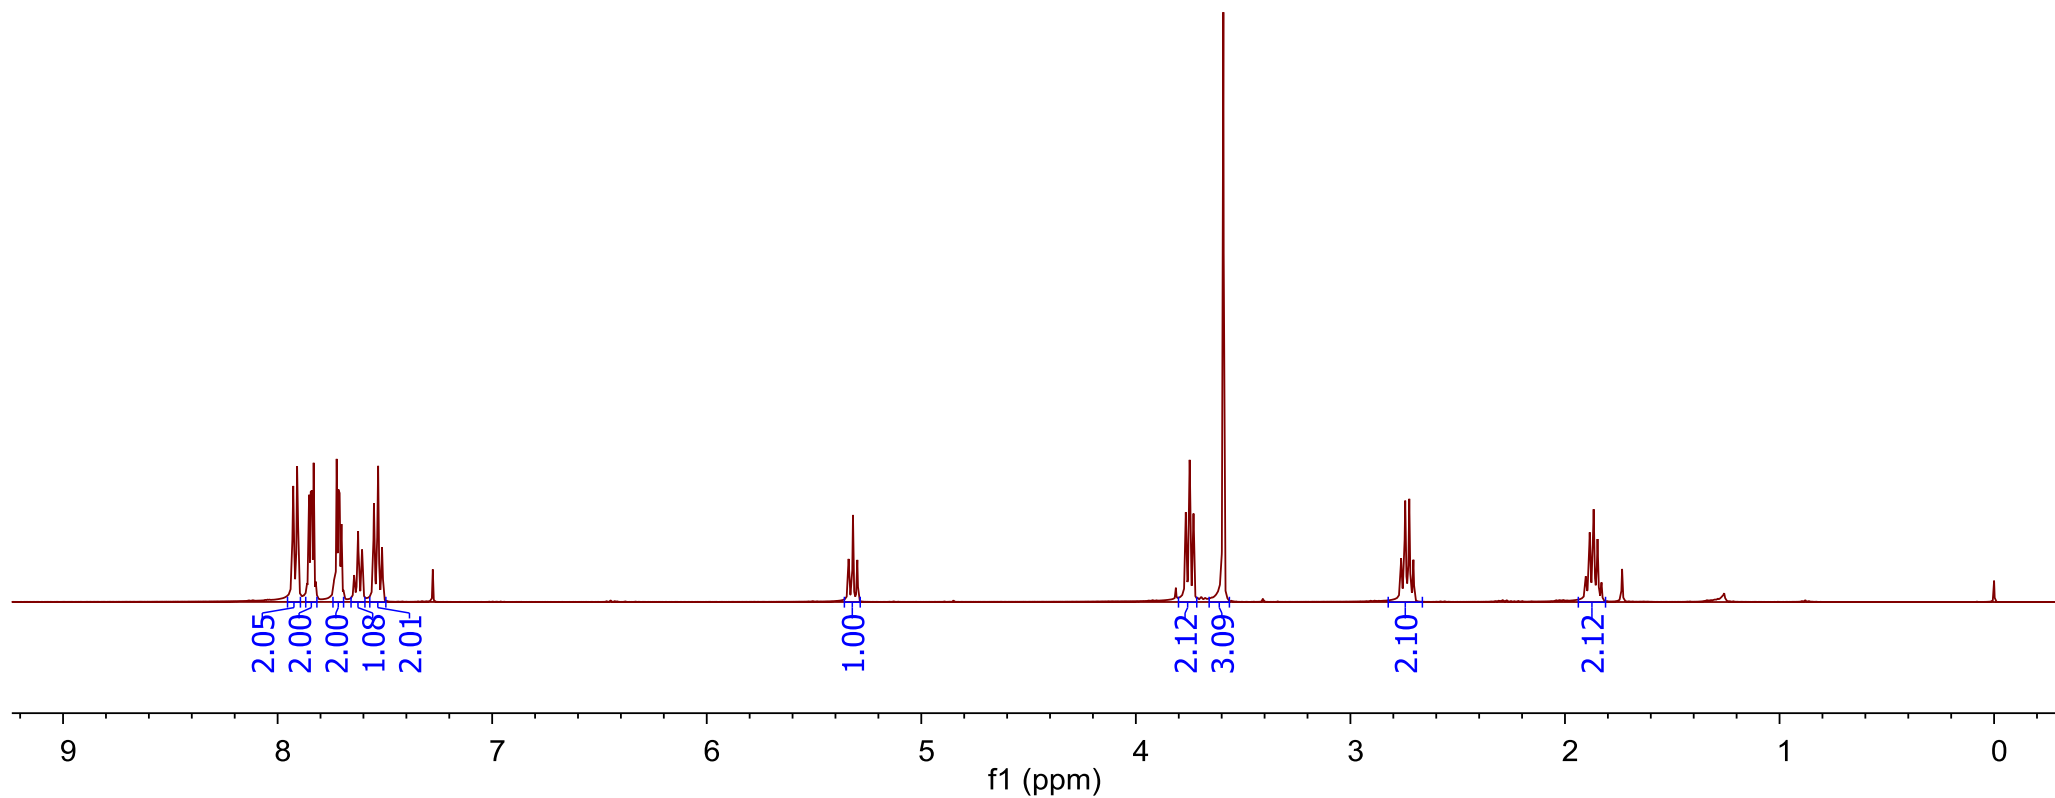

<sup>1</sup>H NMR Spectrum of Z-10

CDCl<sub>3</sub>, 100.61 MHz

— 168.46

— 153.41

139.78

134.05

133.70

132.22

129.08

128.24

123.30

— 112.81

— 58.39

37.27

29.09

22.60

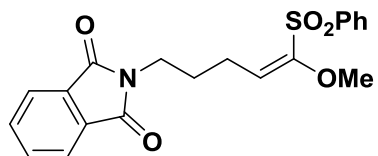

Z-10

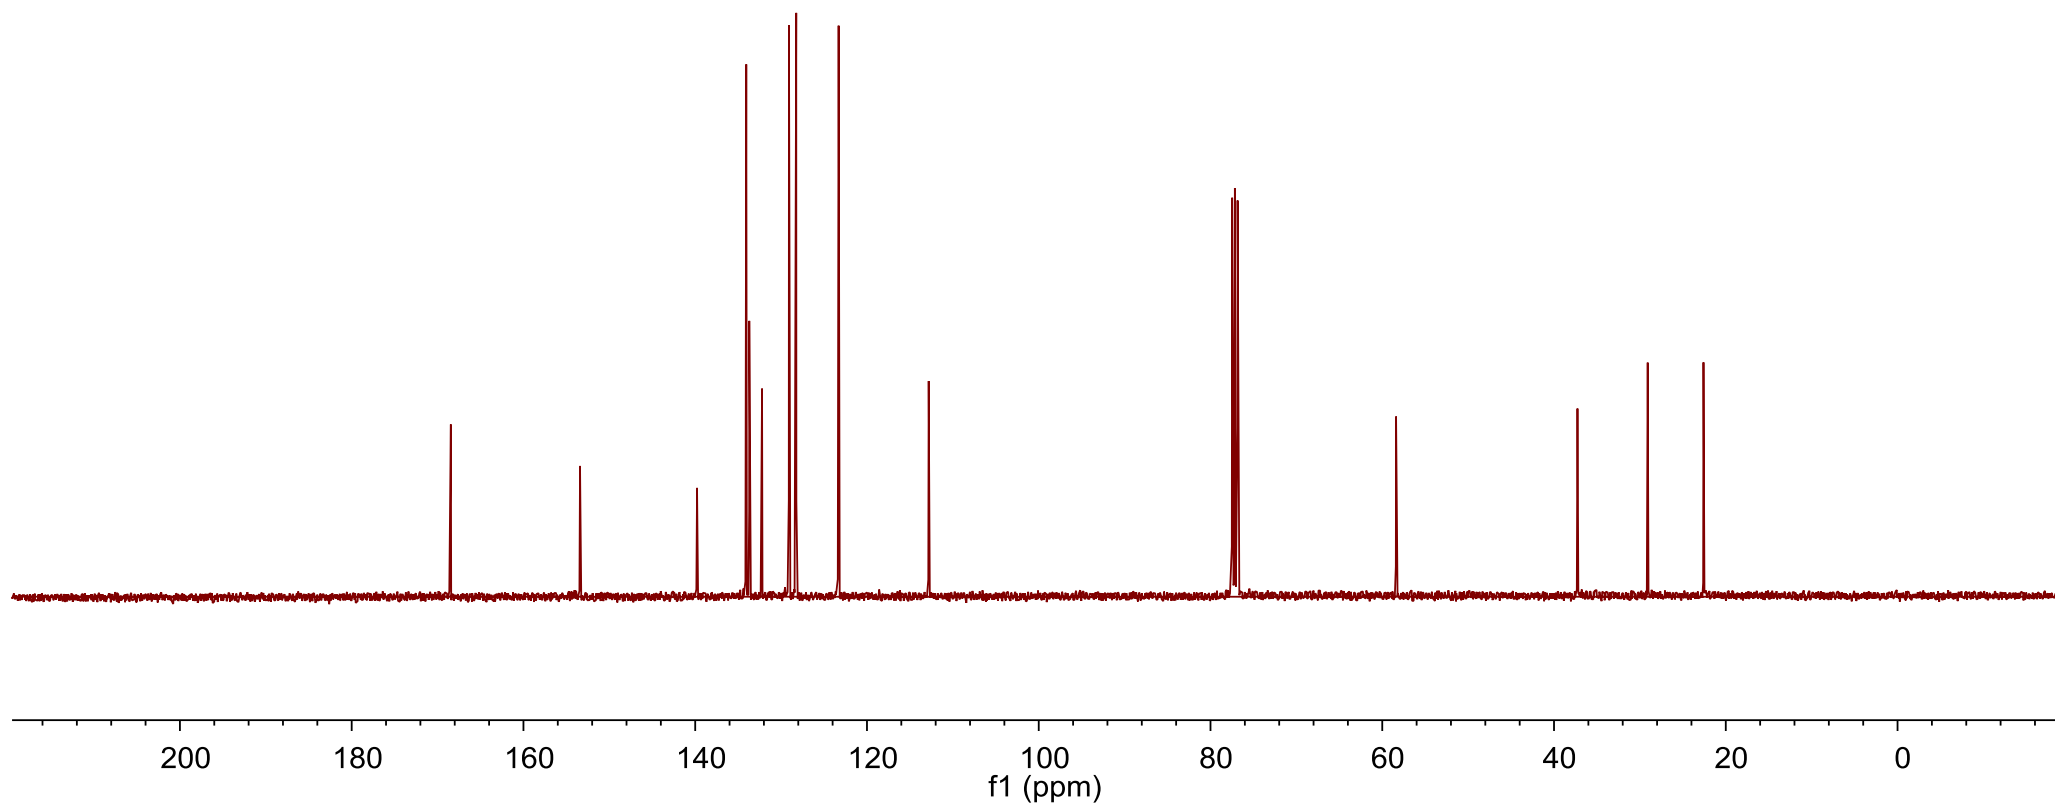

<sup>13</sup>C NMR Spectrum of Z-10

CDCl<sub>3</sub>, 400.13 MHz

5.34  
5.32  
5.30

3.59

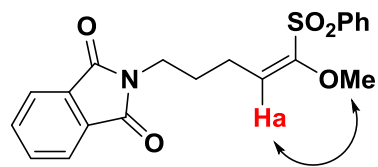

Z-10

Ha

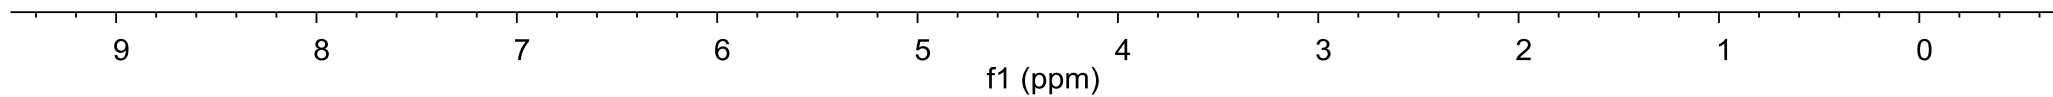

1D-NOE Spectrum of Z-10

CDCl<sub>3</sub>, 400 MHz

6.49  
6.47  
6.45

3.82

0.00

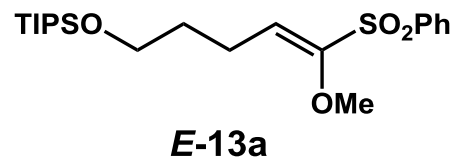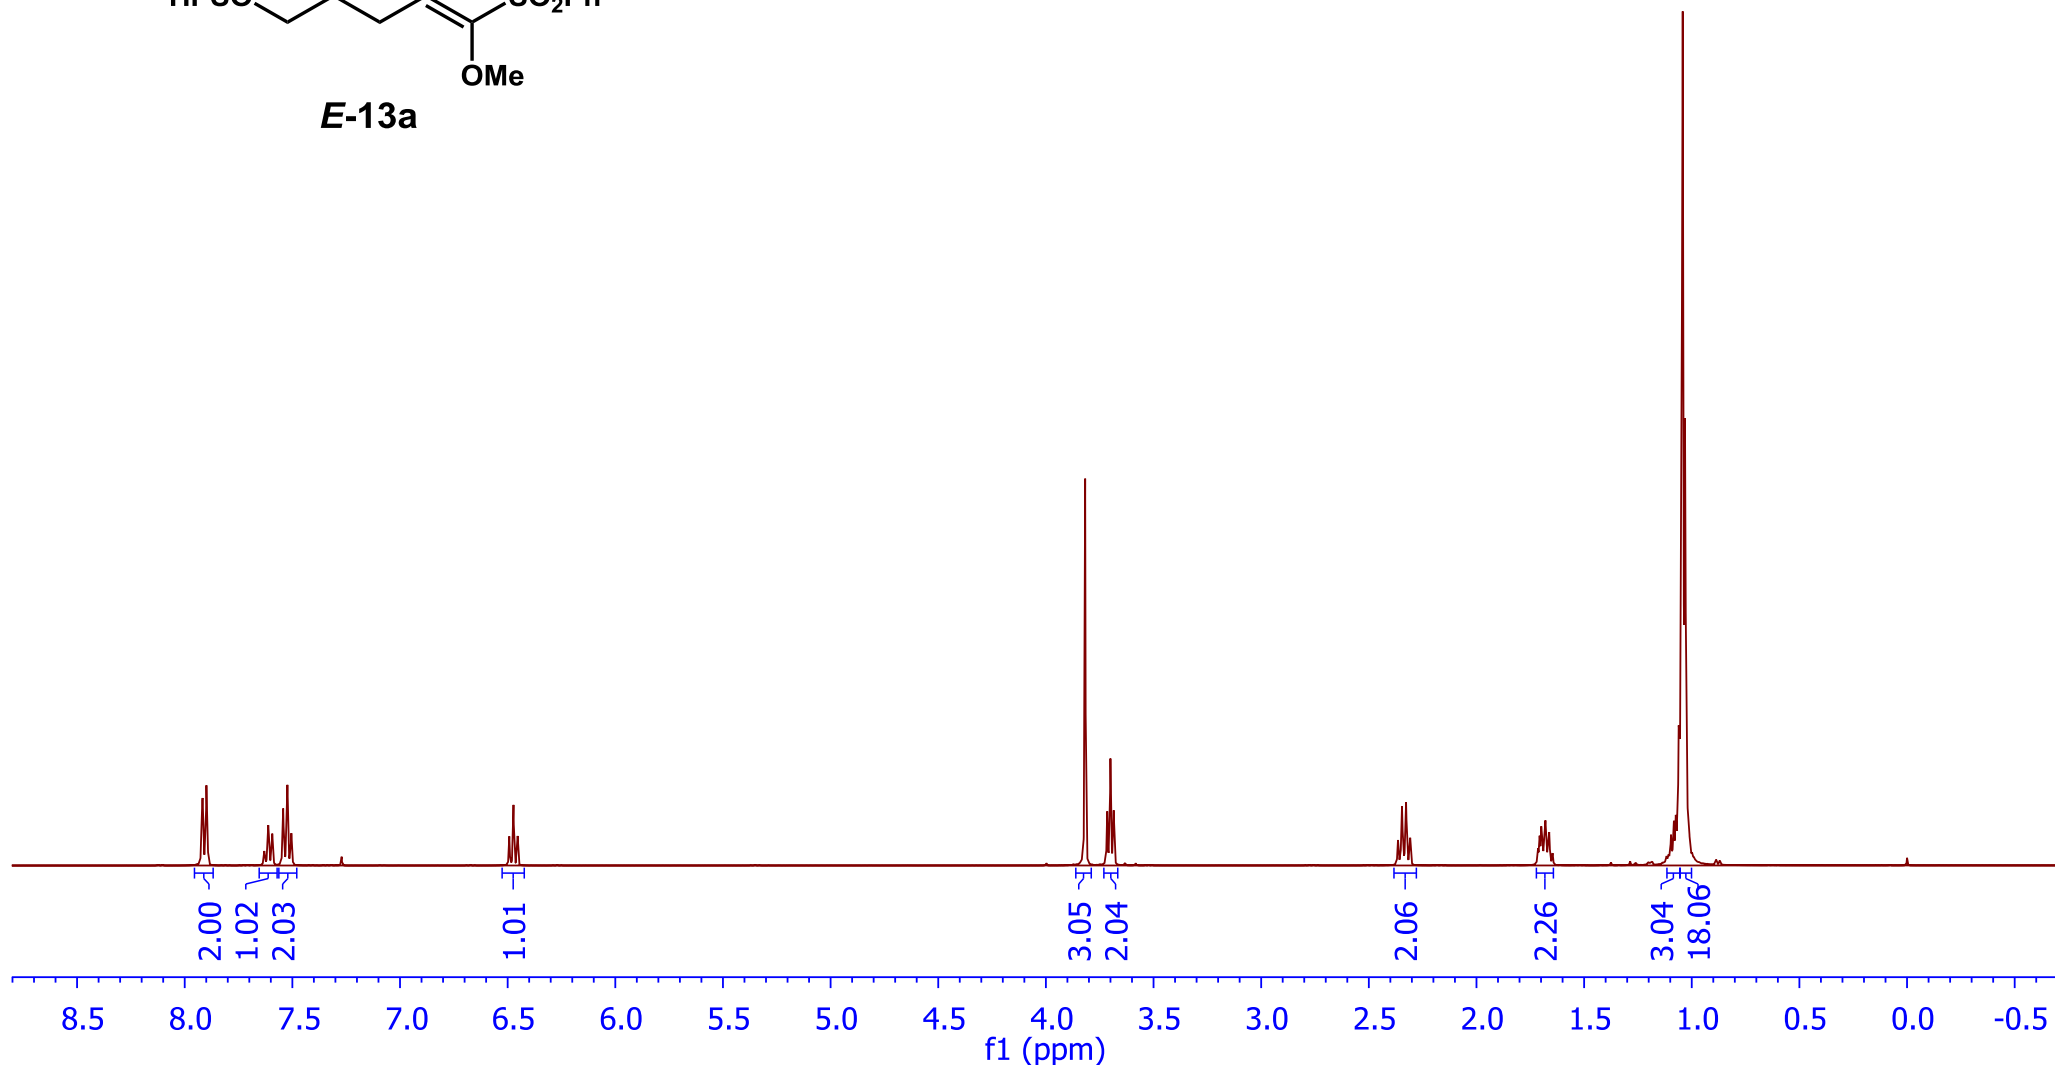

<sup>1</sup>H NMR Spectrum of *E*-13a

CDCl<sub>3</sub>, 101 MHz

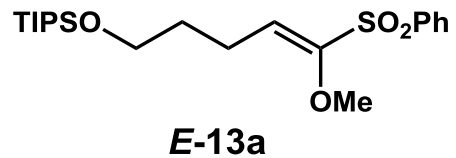

153.93  
139.24  
133.52  
129.11  
128.33  
126.92  
63.23  
62.43  
31.87  
22.37  
18.08  
12.04

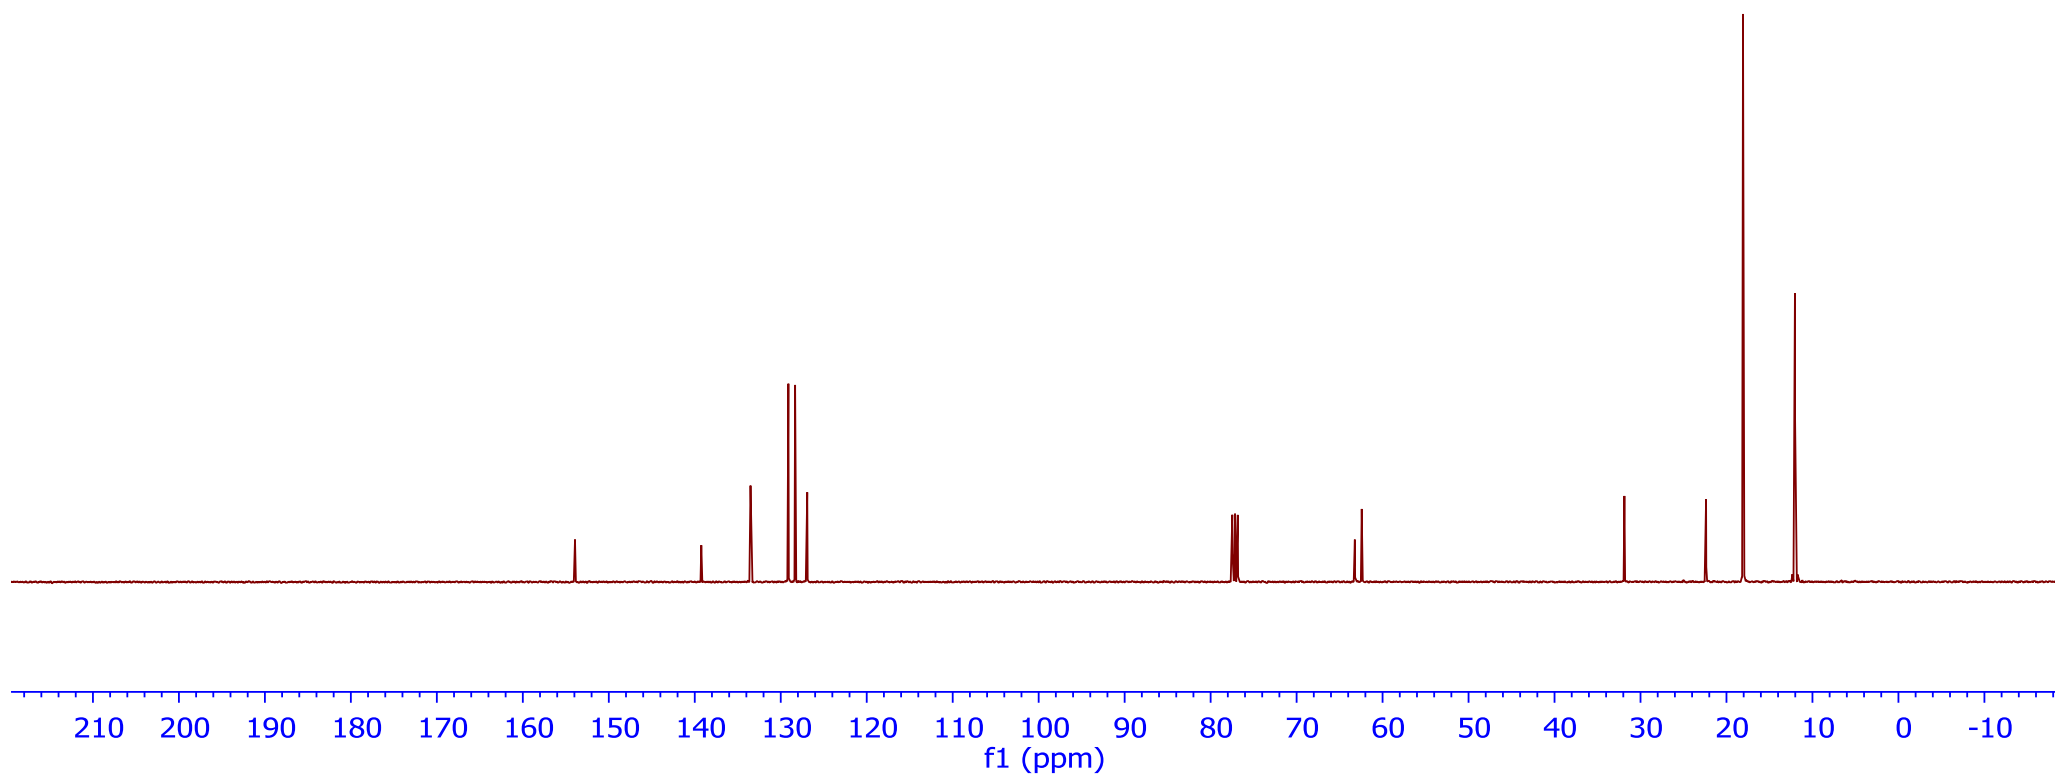

<sup>13</sup>C NMR Spectrum of *E*-13a

CDCl<sub>3</sub>, 400.13 MHz

6.49  
6.47  
6.45

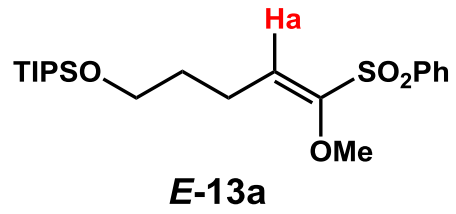

**Ha**

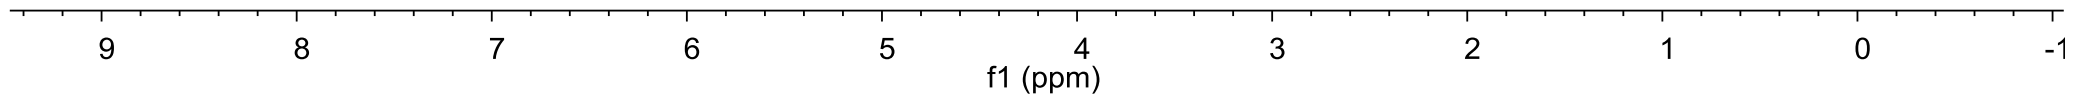

1D-NOE Spectrum of **E-13a**





CDCl<sub>3</sub>, 101 MHz

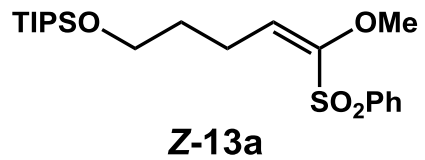

— 152.67

— 140.09

— 133.60

— 129.04

— 128.16

— 115.33

— 62.88

— 58.61

— 33.55

— 22.14

— 18.15

— 12.11

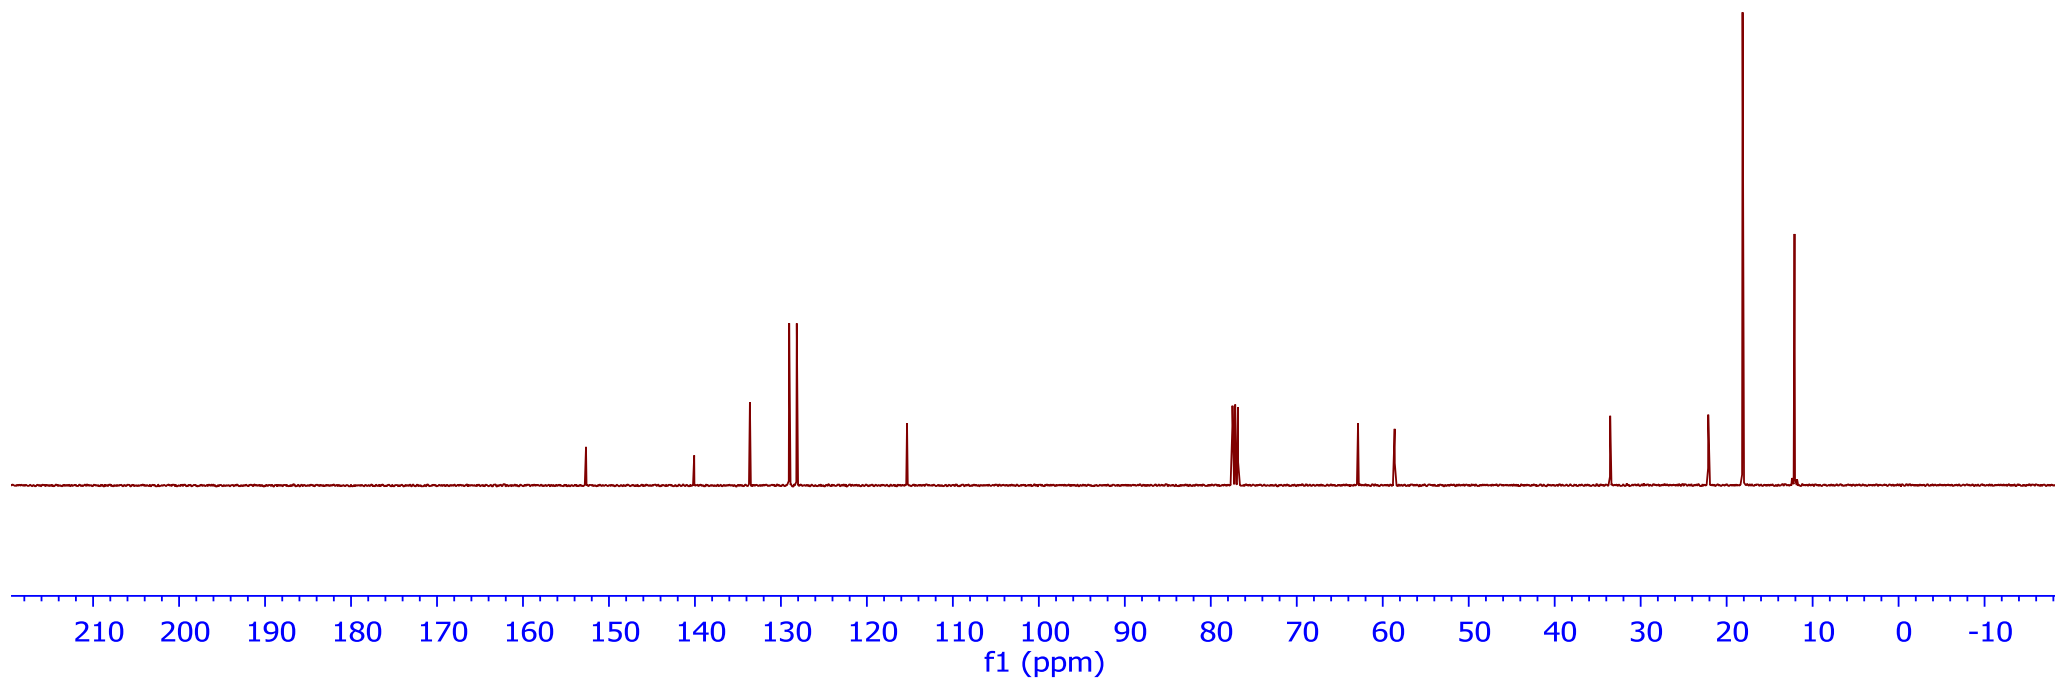

<sup>13</sup>C NMR Spectrum of **Z-13a**

CDCl<sub>3</sub>, 400.13 MHz

5.37  
5.35  
5.33

3.58

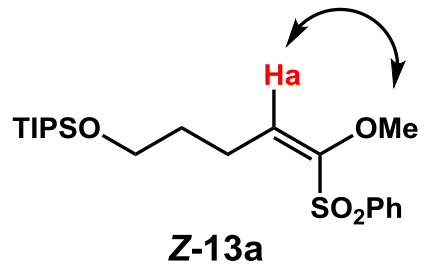

Ha

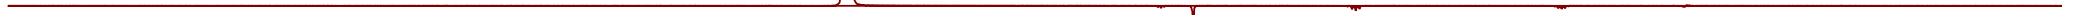

9

8

7

6

5

f1 (ppm)

4

3

2

1

0

1D-NOE Spectrum of **Z-13a**

CDCl<sub>3</sub>, 400.13 MHz

6.38  
6.36  
6.34

3.73

-0.00

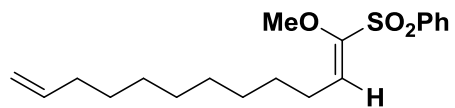

*E*-13b

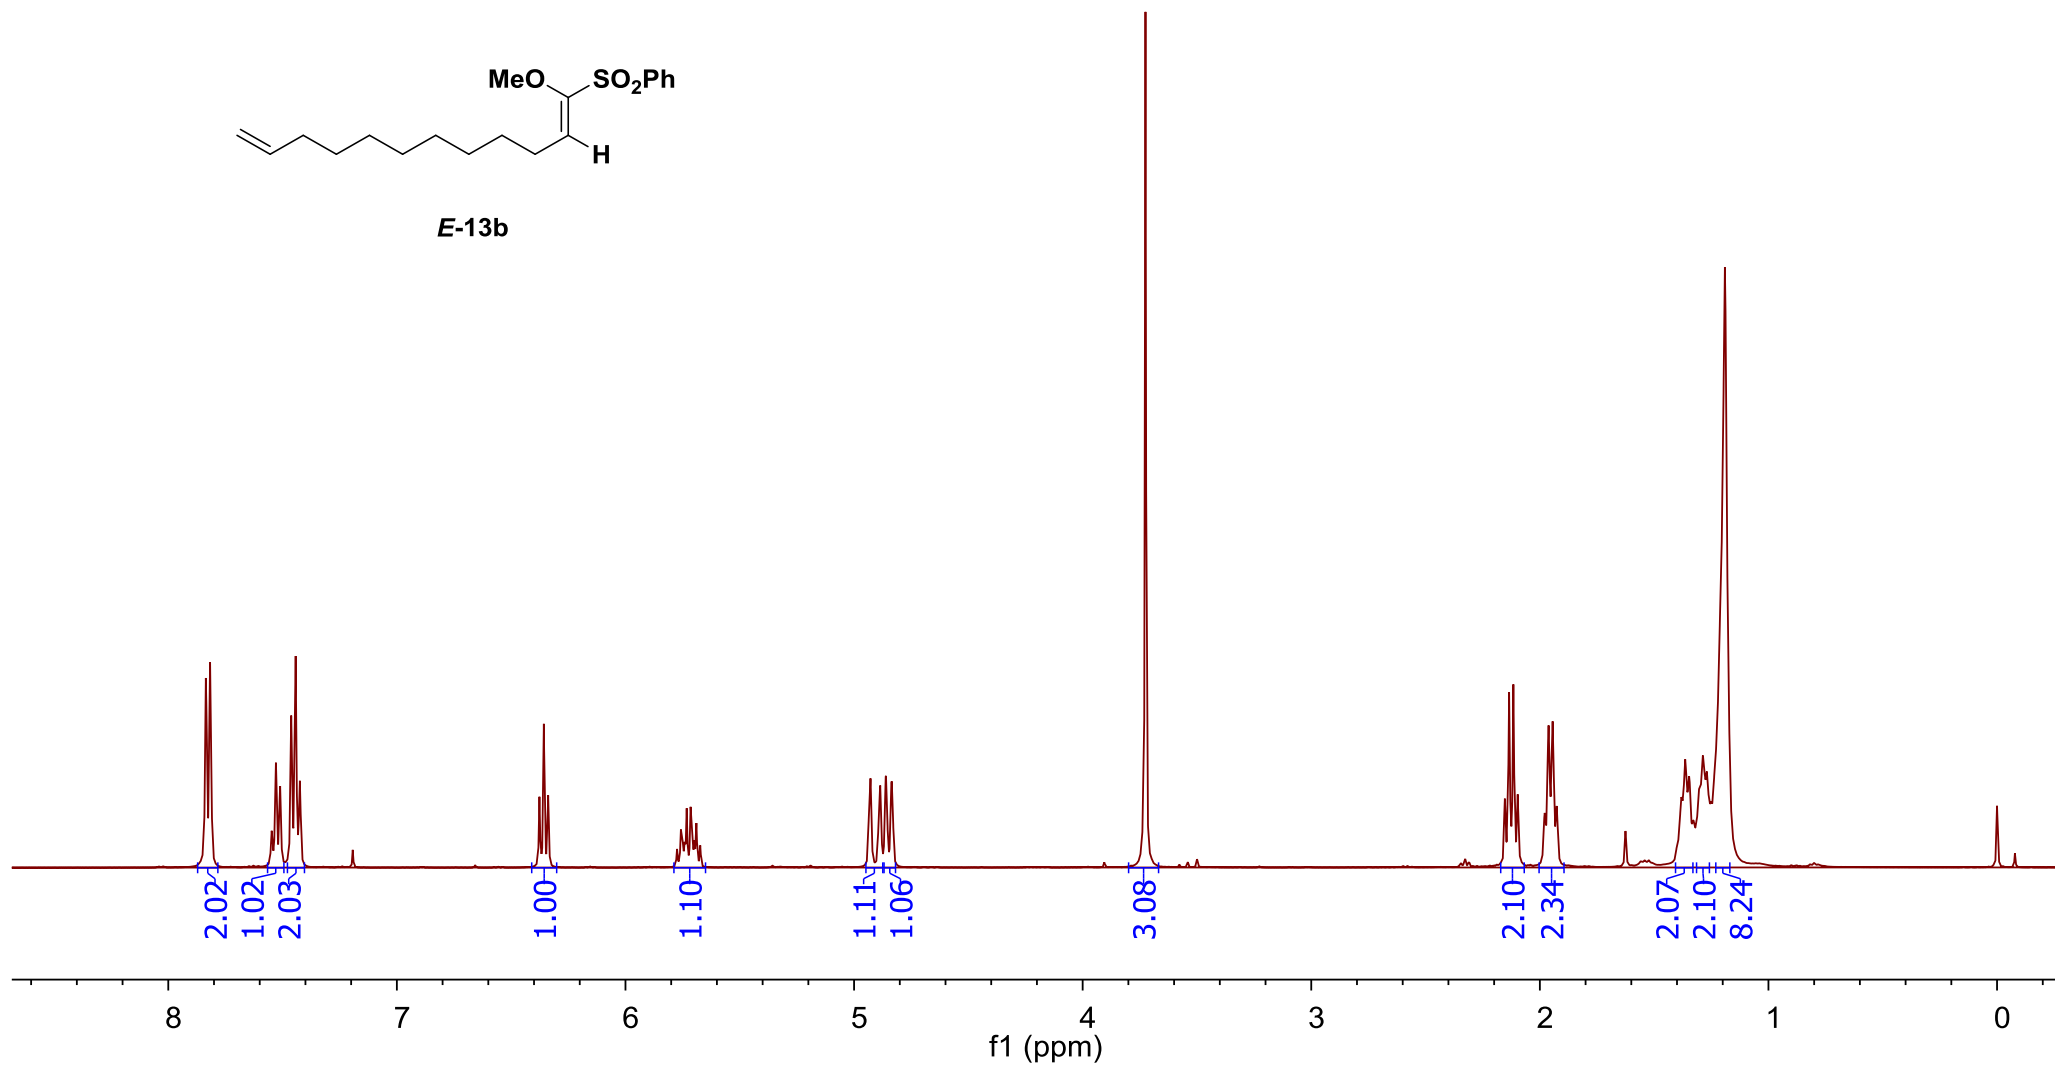

<sup>1</sup>H NMR Spectrum of *E*-13b

CDCl<sub>3</sub>, 100.61 MHz

— 153.66  
139.28  
139.16  
133.49  
129.09  
128.27  
127.35  
— 114.24

— 63.21

33.81  
29.37  
29.29  
29.27  
29.08  
28.93  
28.53  
25.66

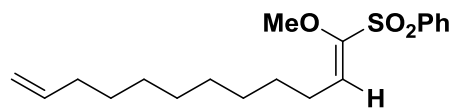

*E*-13b

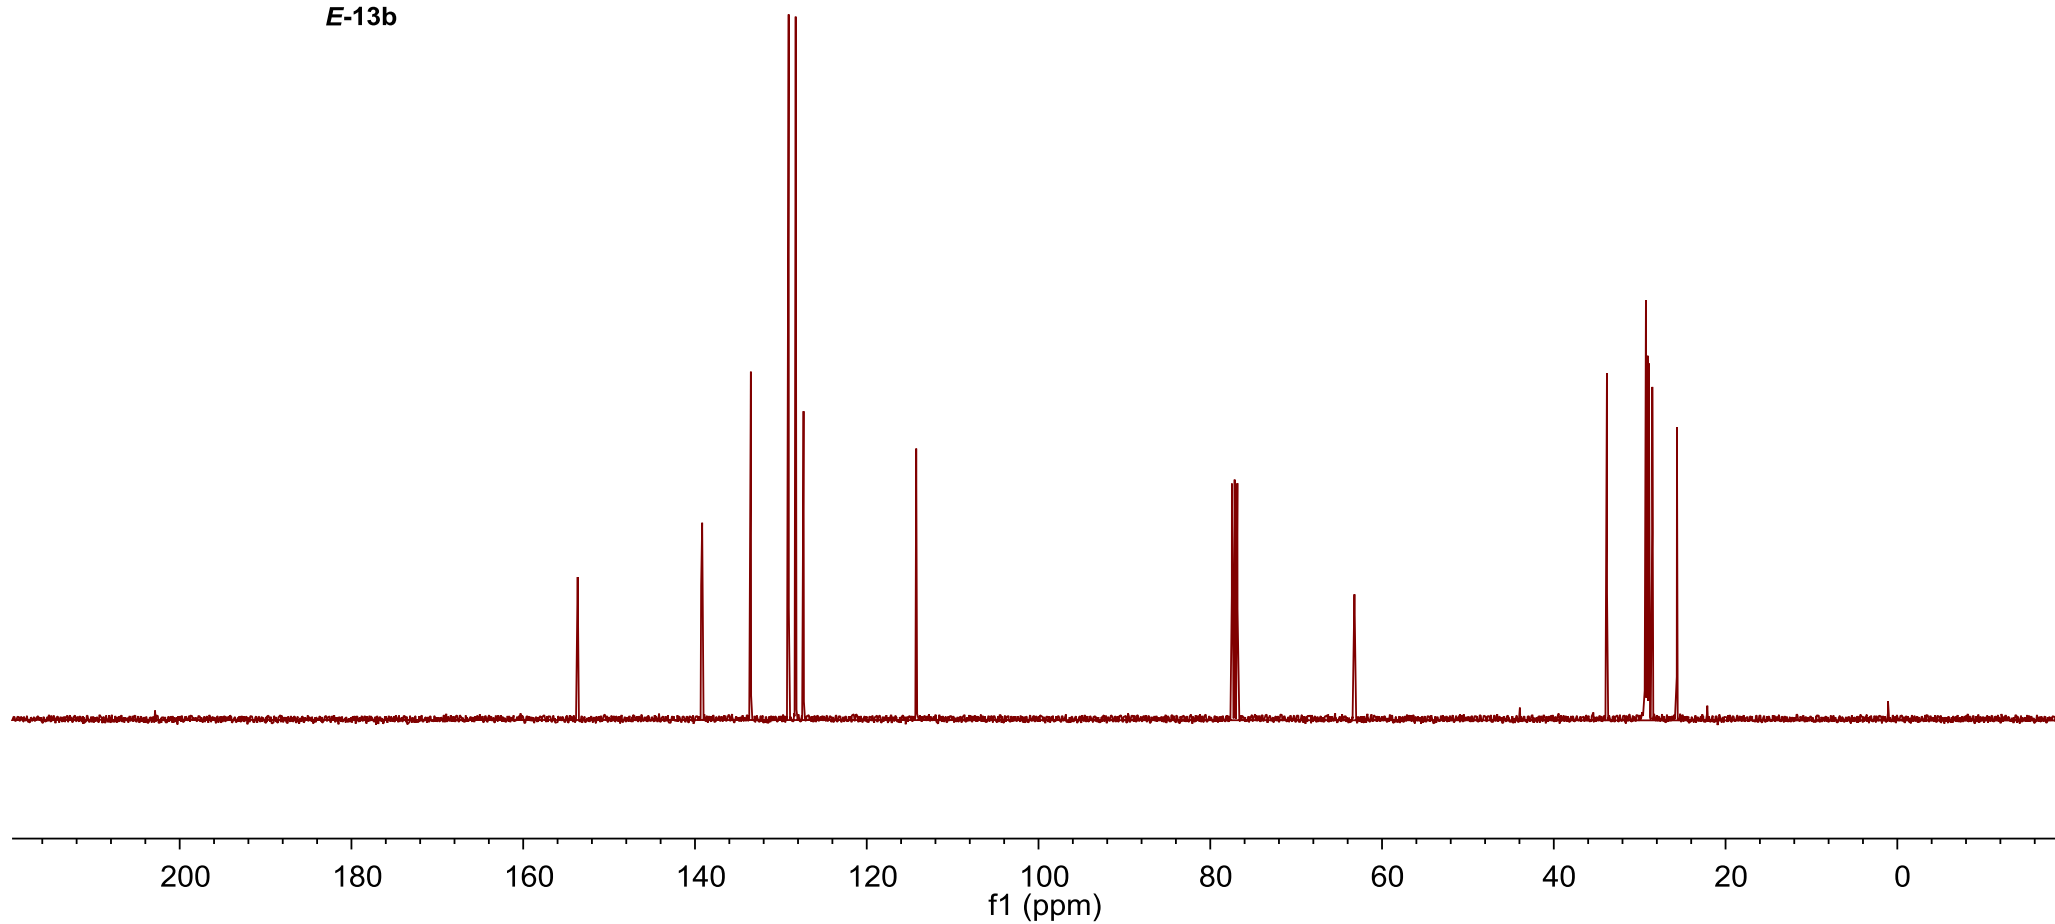

<sup>13</sup>C NMR Spectrum of *E*-13b

CDCl<sub>3</sub>, 400.13 MHz

6.38  
6.36  
6.34

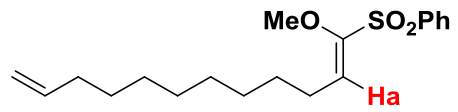

*E*-13b

Ha

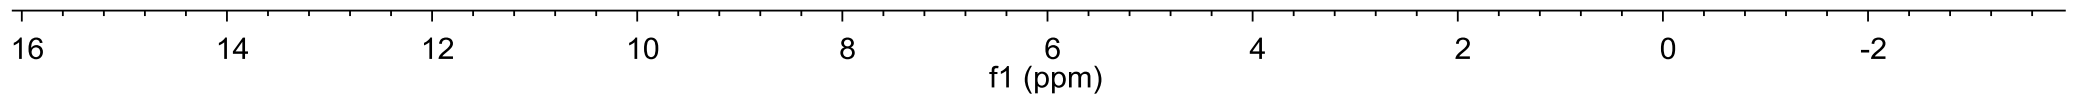

1D-NOE Spectrum of *E*-13b

CDCl<sub>3</sub>, 400.13 MHz

5.30  
5.28  
5.26

3.58

0.00

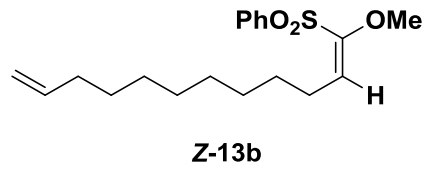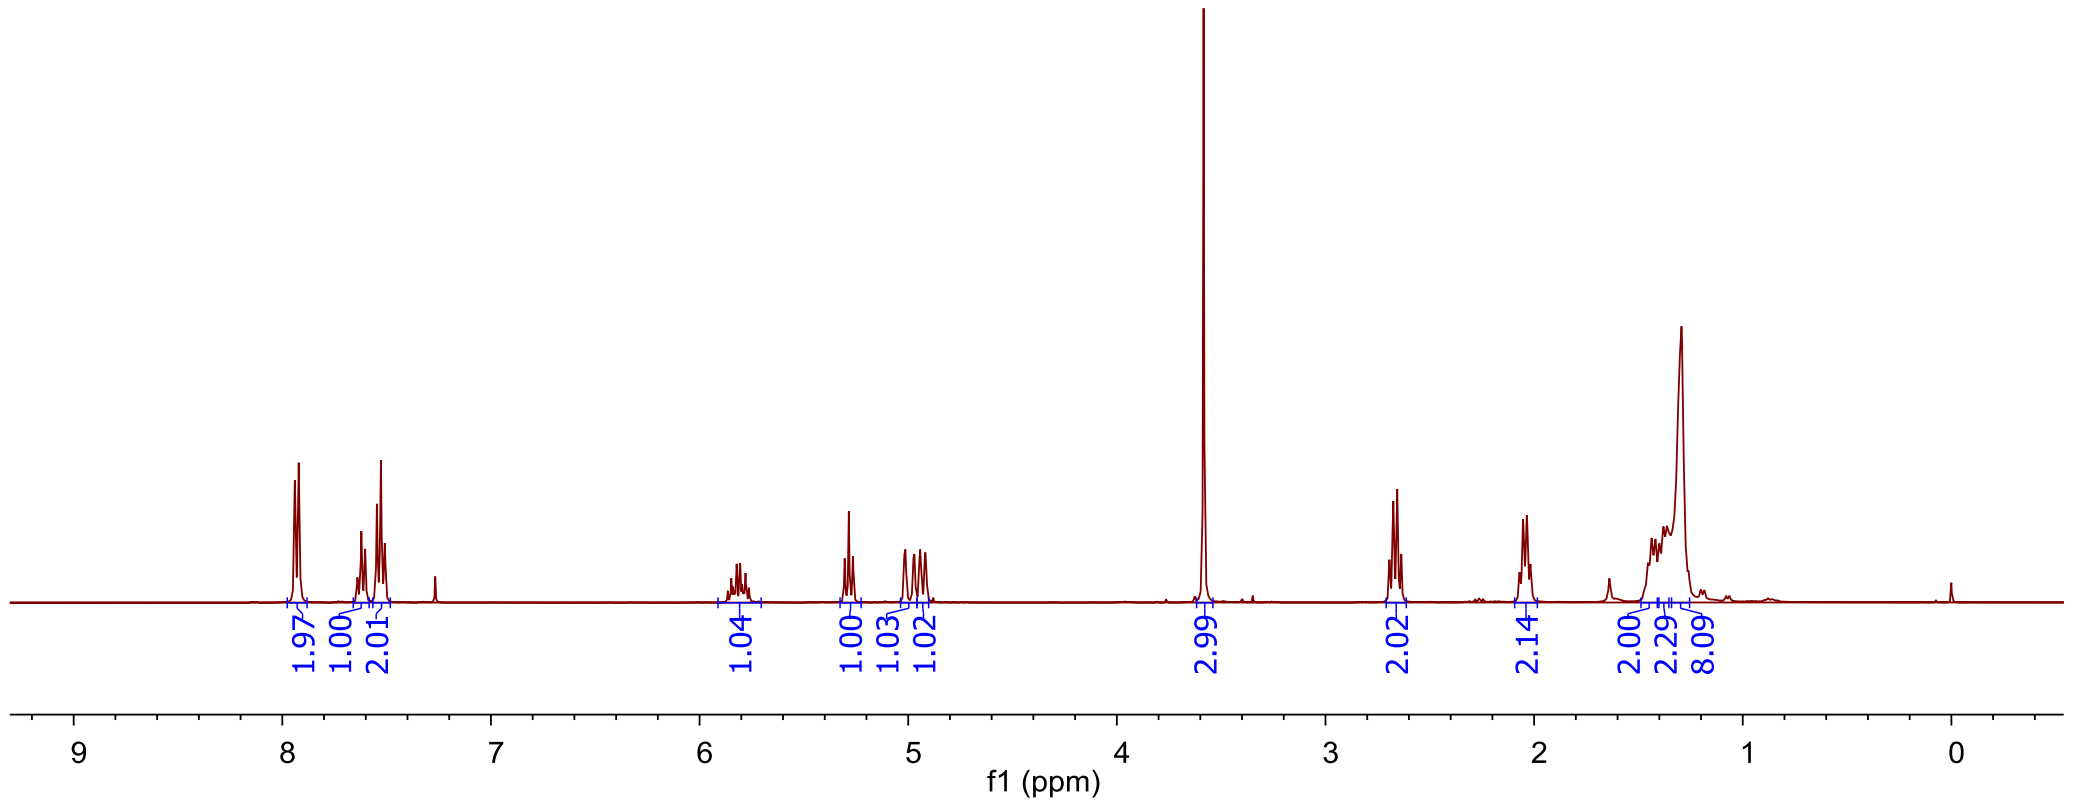

<sup>1</sup>H NMR Spectrum of **Z-13b**

CDCl<sub>3</sub>, 100.61 MHz

152.57  
140.13  
139.29  
133.59  
129.02  
128.17  
115.95  
114.25

58.71

33.89  
30.31  
29.50  
29.46  
29.26  
29.19  
29.03  
25.34

30.31

29.50  
29.46  
29.26  
29.19  
29.03

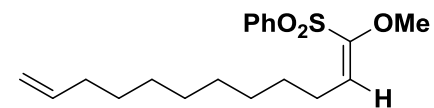

Z-13b

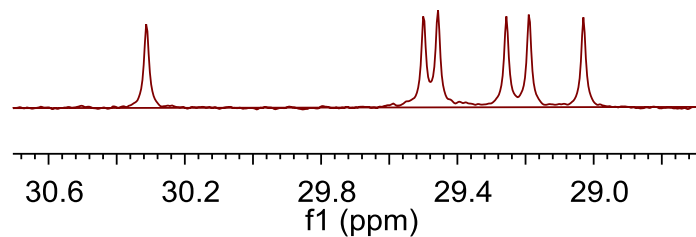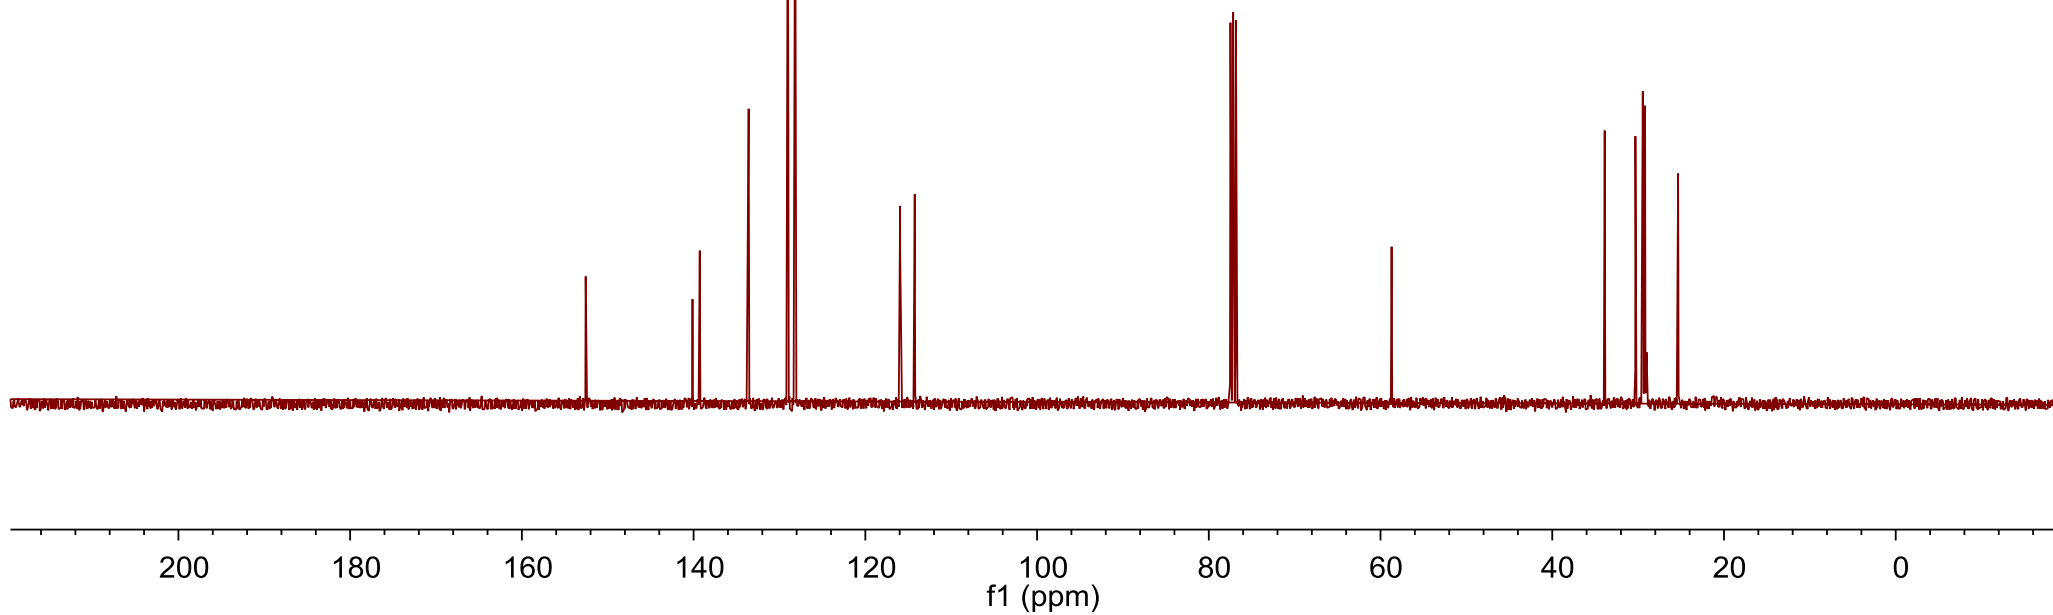

<sup>13</sup>C NMR Spectrum of Z-13b



CDCl<sub>3</sub>, 400.13 MHz

5.30  
5.28  
5.26

3.58

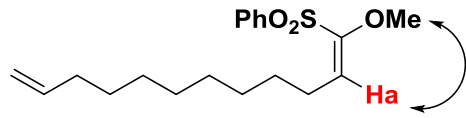

Z-13b

Ha

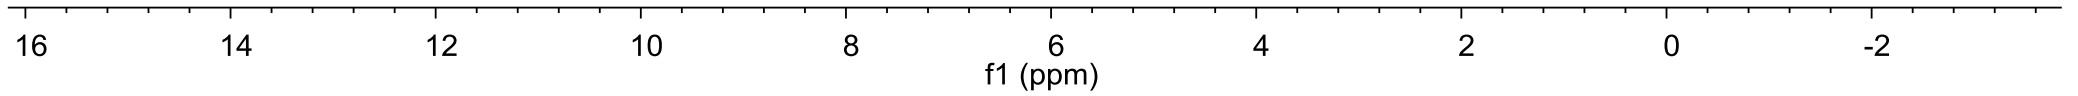

1D-NOE Spectrum of Z-13b

CDCl<sub>3</sub>, 400 MHz

6.48  
6.46  
6.44

3.81

0.00

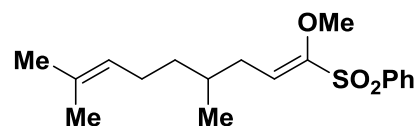

*E*-13c

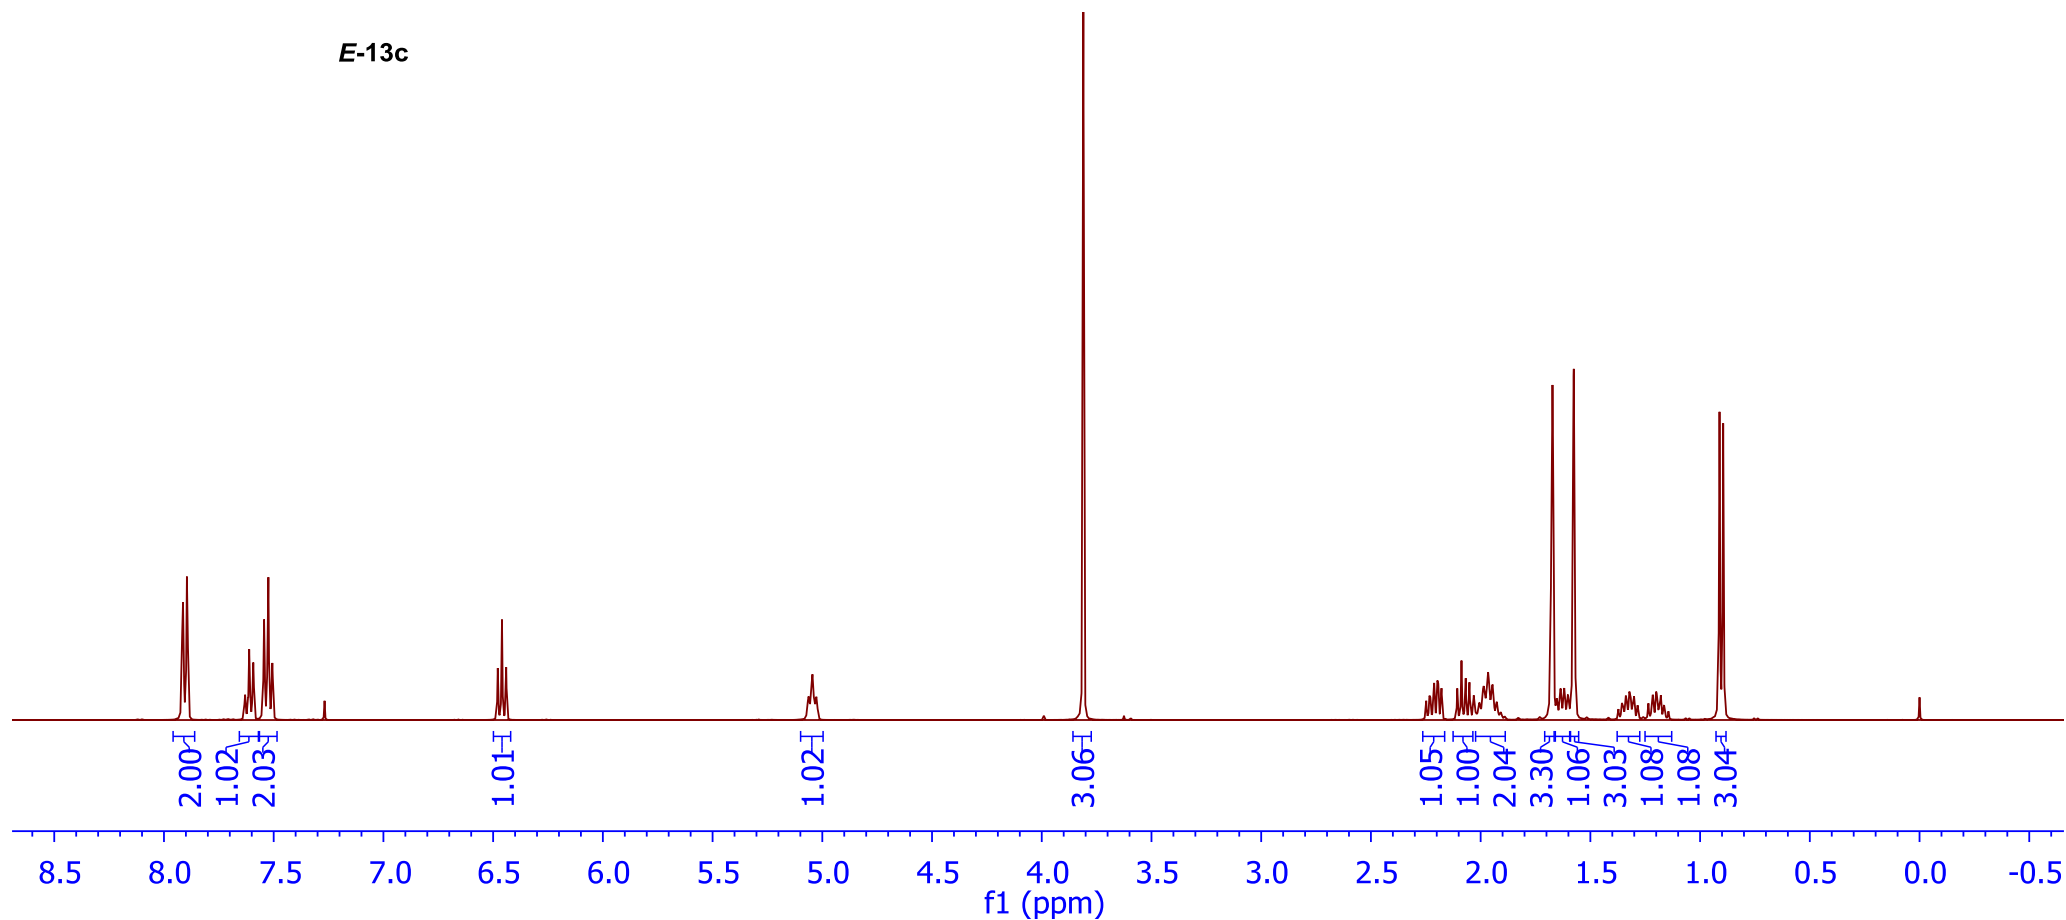

<sup>1</sup>H NMR Spectrum of *E*-13c

CDCl<sub>3</sub>, 101 MHz

154.14  
139.35  
133.51  
131.65  
129.13  
128.26  
126.29  
124.31

63.14

36.80  
32.72  
32.47  
25.80  
25.54  
19.70  
17.73

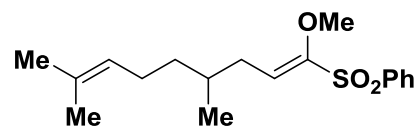

*E*-13c

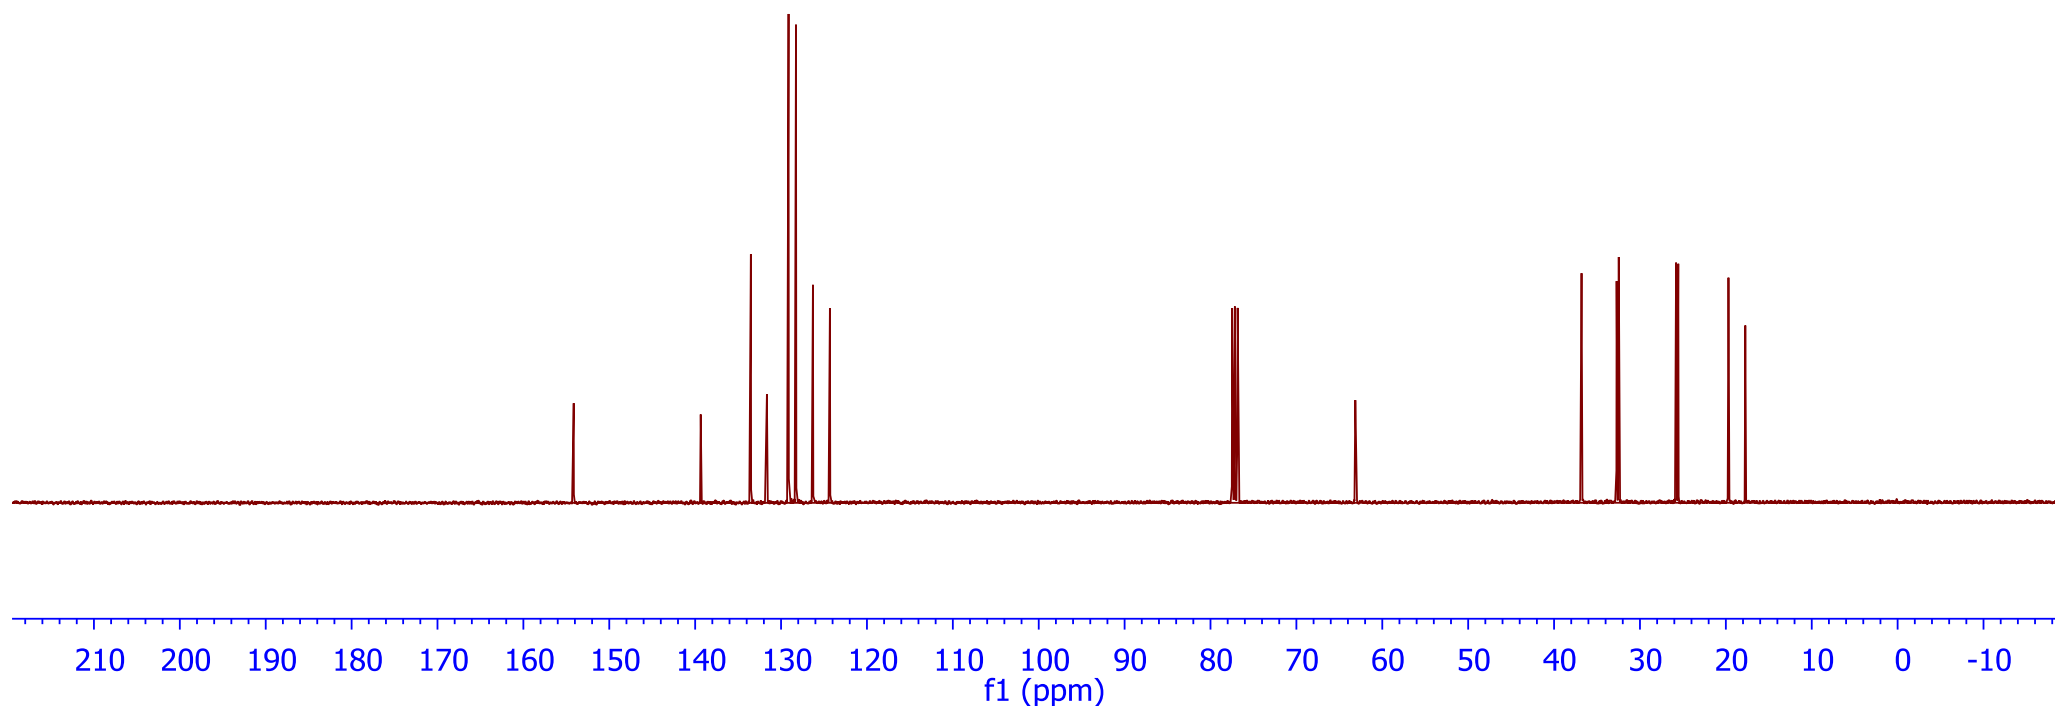

<sup>13</sup>C NMR Spectrum of *E*-13c

CDCl<sub>3</sub>, 400.13 MHz

6.50  
6.48  
6.46

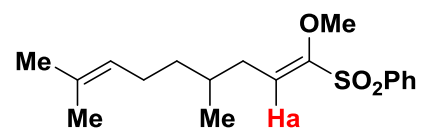

*E*-13c

Ha

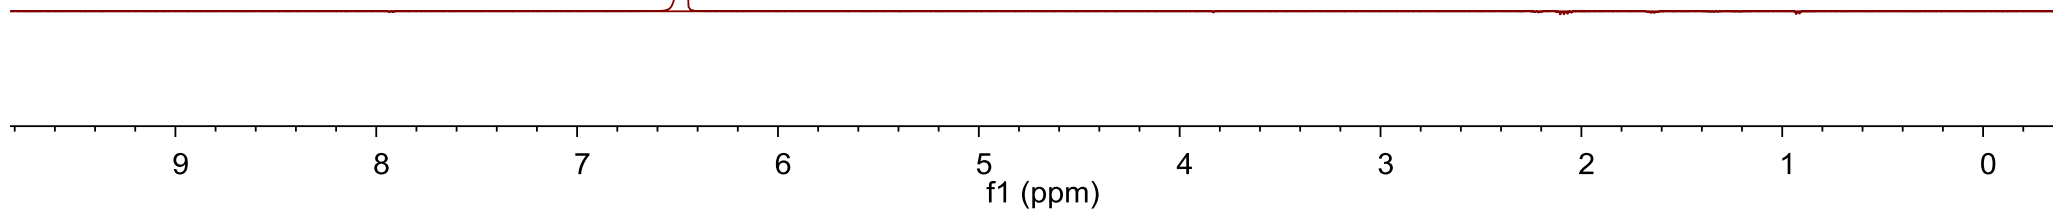

1D-NOE Spectrum of *E*-13c

CDCl<sub>3</sub>, 400 MHz

5.32  
5.30  
5.28

3.60

0.00

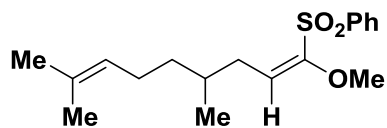

Z-13c

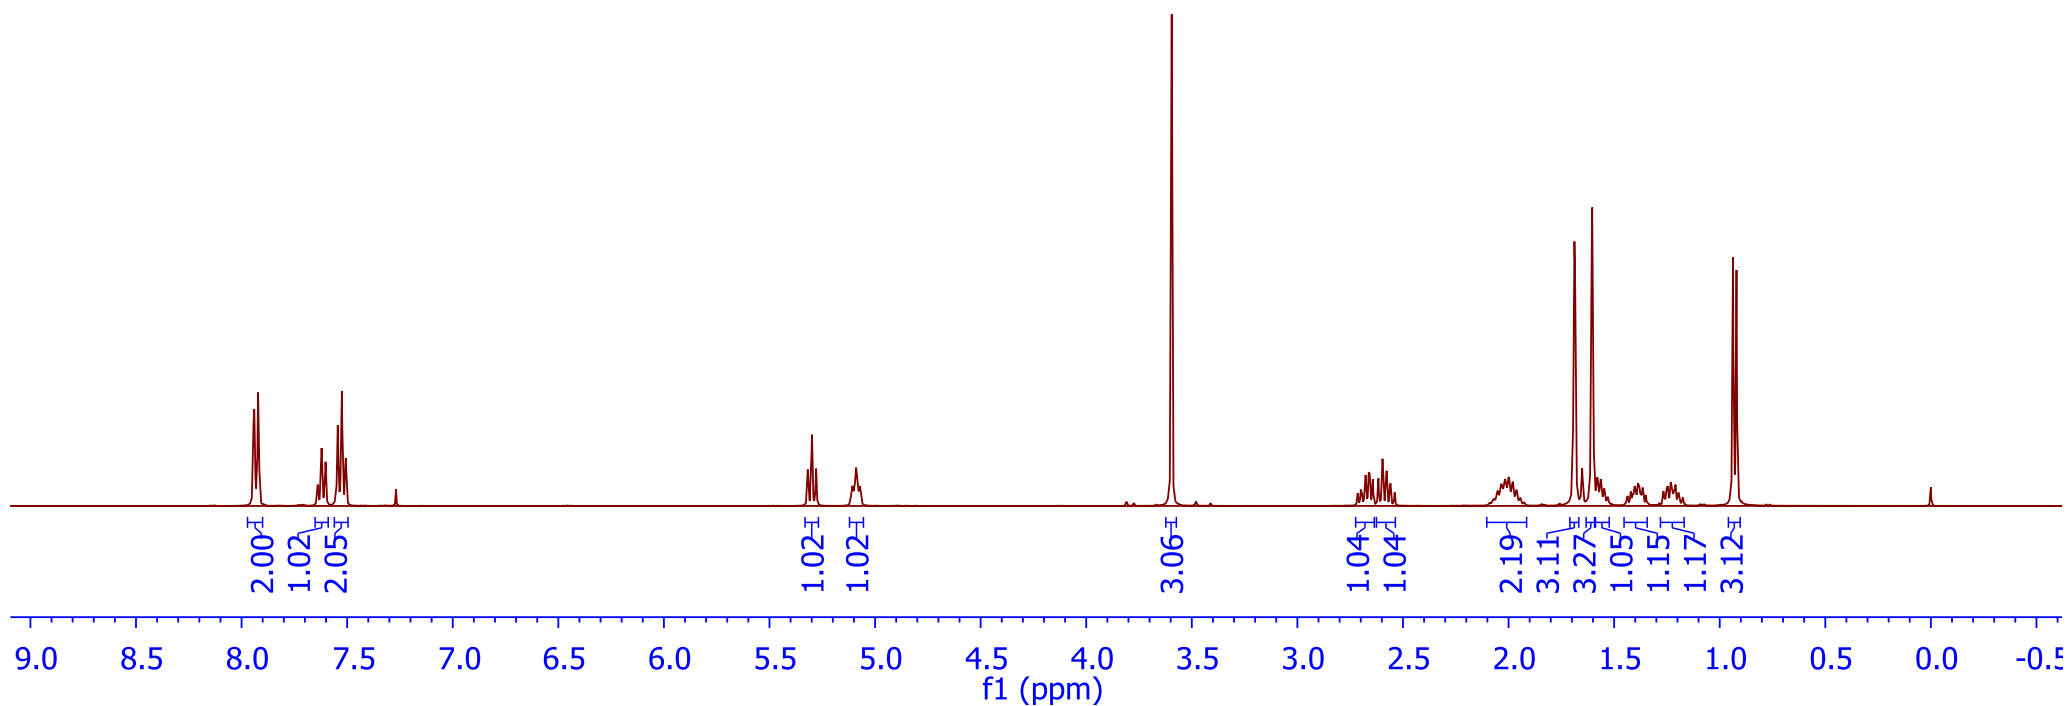

<sup>1</sup>H NMR Spectrum of Z-13c

CDCl<sub>3</sub>, 101 MHz

— 153.02  
/ 140.07  
/ 133.59  
/ 131.48  
/ 129.00  
/ 128.22  
/ 124.64  
— 114.92

— 58.82

/ 36.72  
/ 33.71  
~ 32.22  
/ 25.82  
/ 25.66  
/ 19.44  
/ 17.78

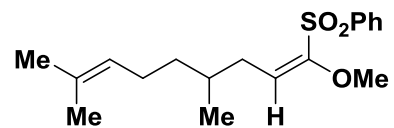

Z-13c

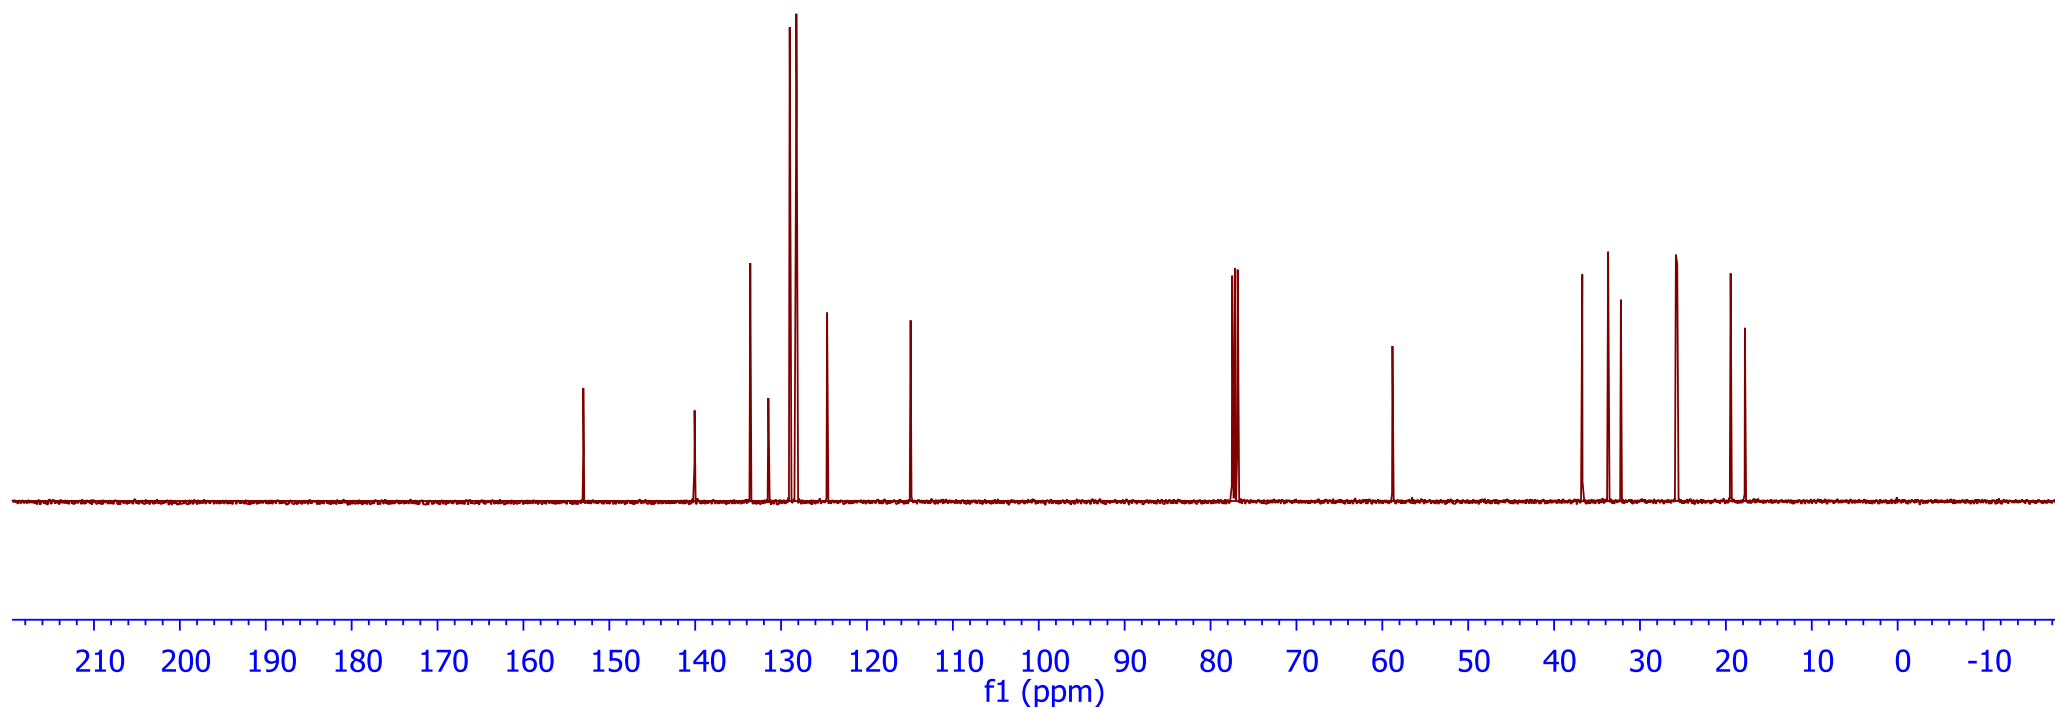

<sup>13</sup>C NMR Spectrum of Z-13c

CDCl<sub>3</sub>, 400.13 MHz

5.34  
5.32  
5.30

3.62

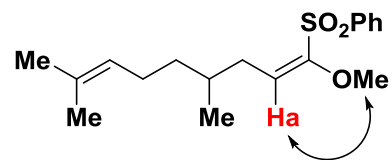

Z-13c

Ha

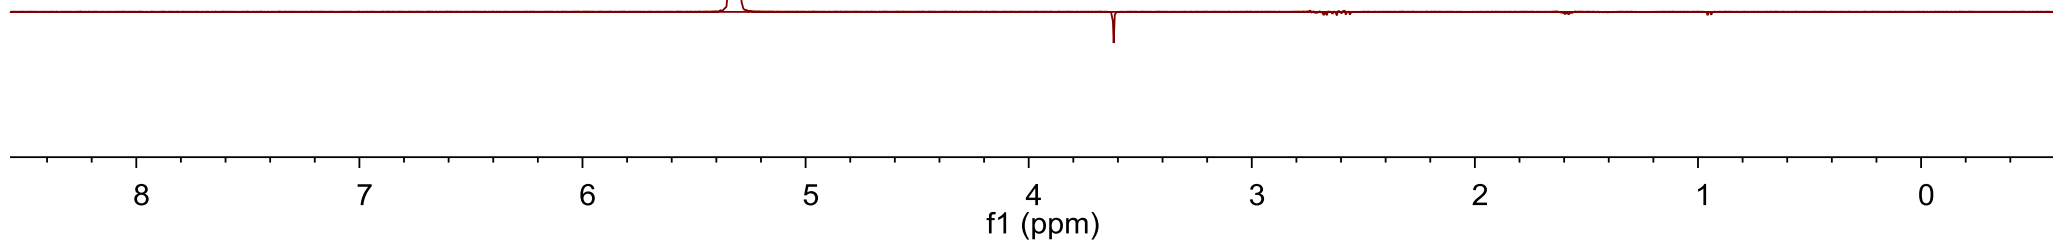

1D-NOE Spectrum of Z-13c

CDCl<sub>3</sub>, 400.13 MHz

— 6.54

— 4.00

— -0.00

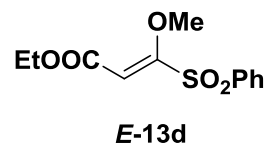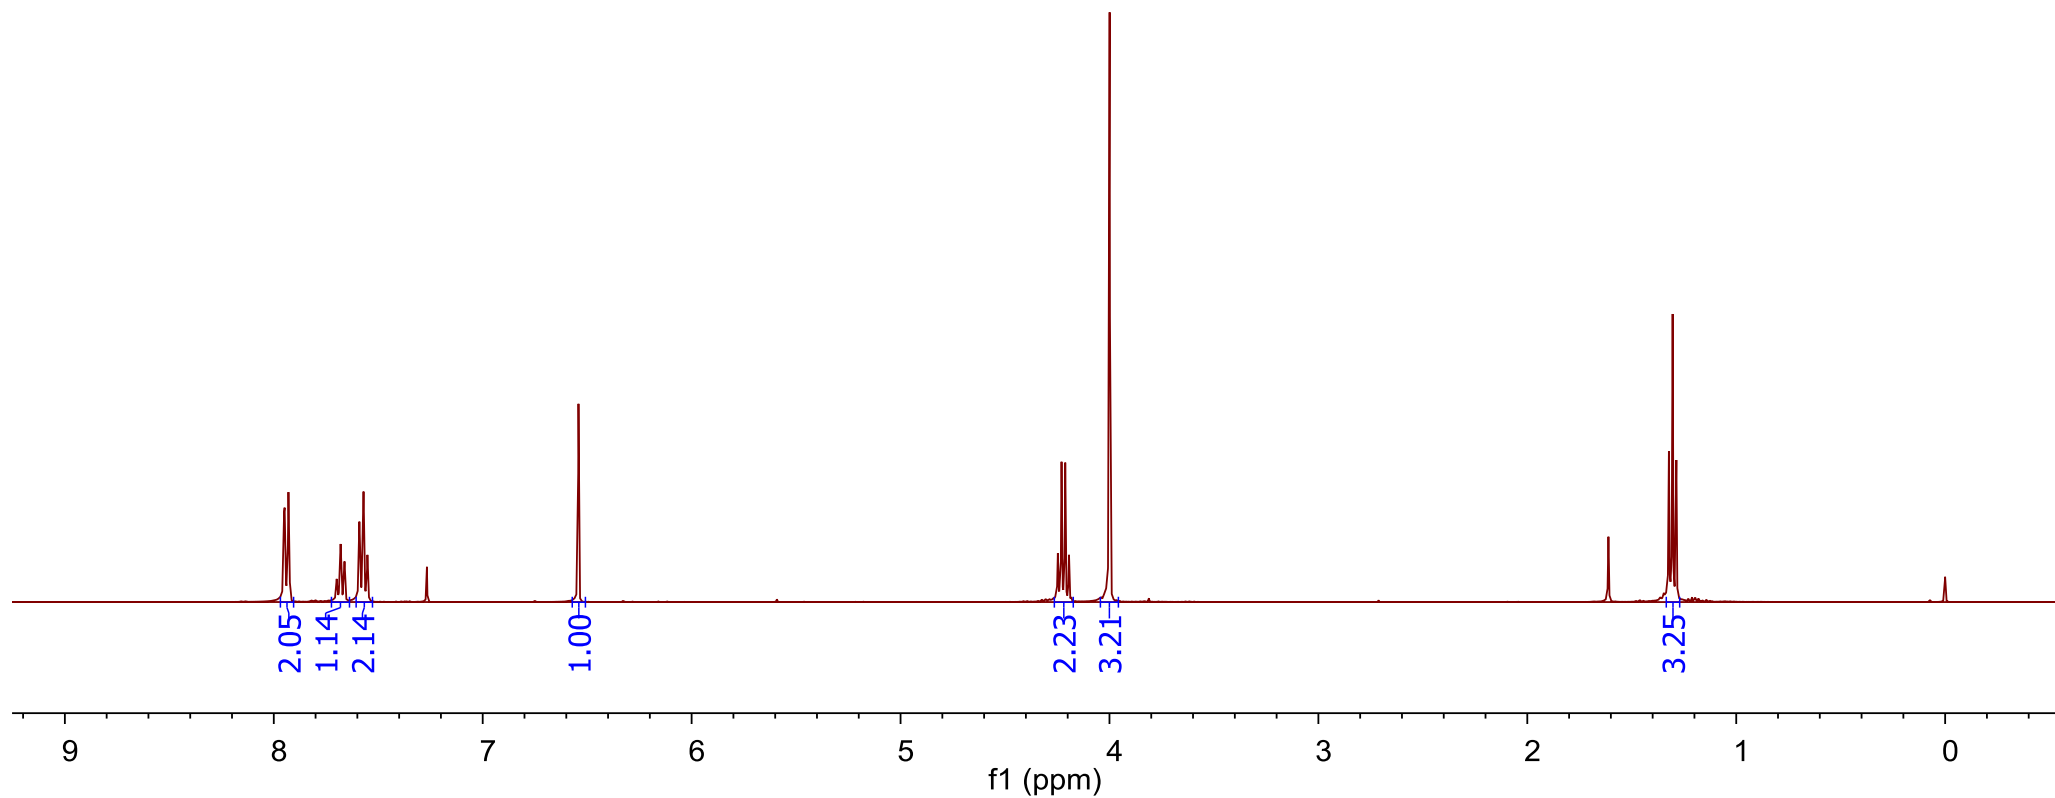

<sup>1</sup>H NMR Spectrum of *E*-13d



CDCl<sub>3</sub>, 100.61 MHz

164.55  
163.16

137.27  
134.48  
129.42  
129.16

107.19

64.63  
61.46

14.20

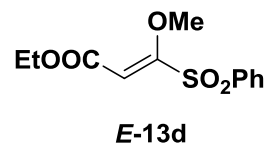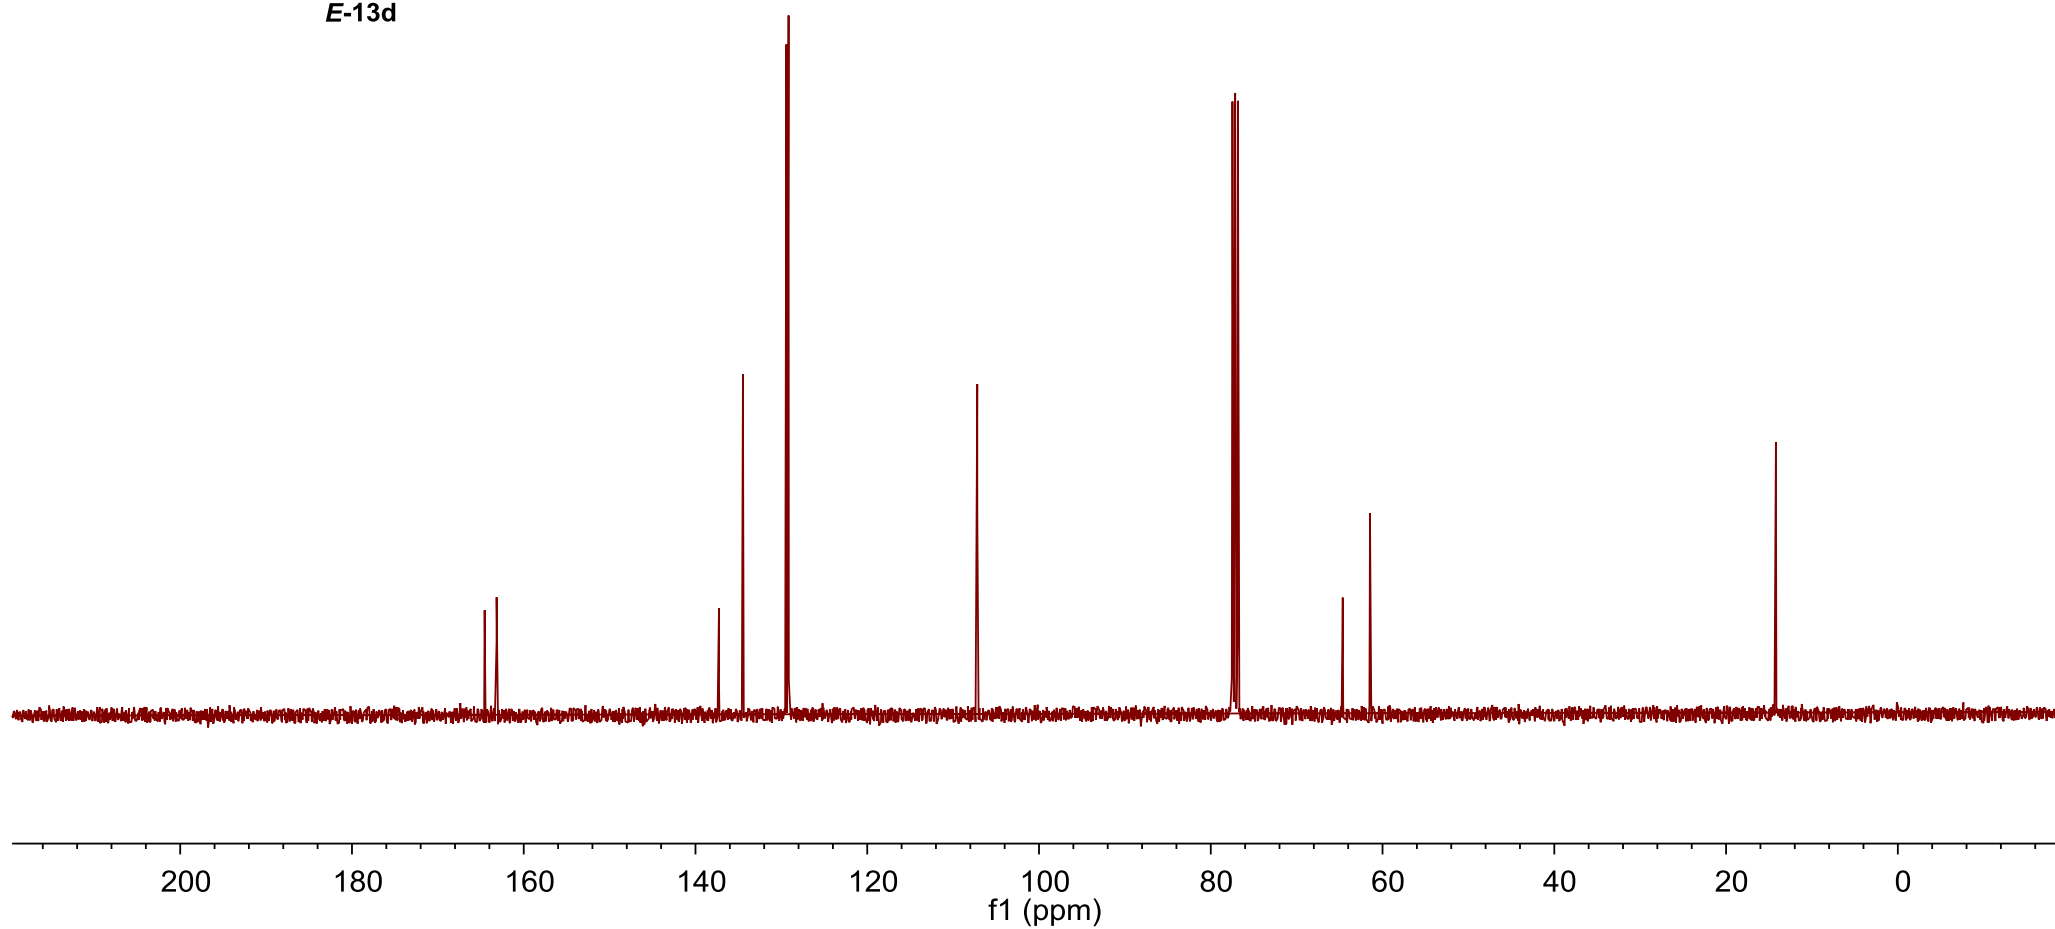

<sup>13</sup>C NMR Spectrum of *E*-13d

CDCl<sub>3</sub>, 400.13 MHz

— 6.54

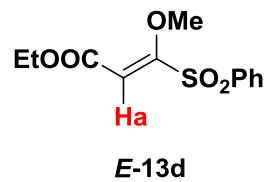

Ha

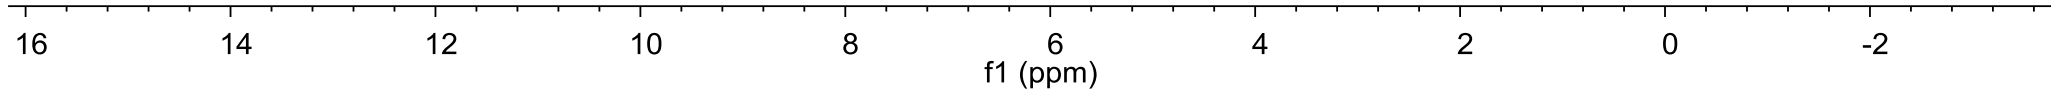

1D-NOE Spectrum of *E*-13d

CDCl<sub>3</sub>, 400.13 MHz

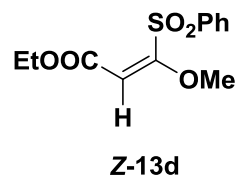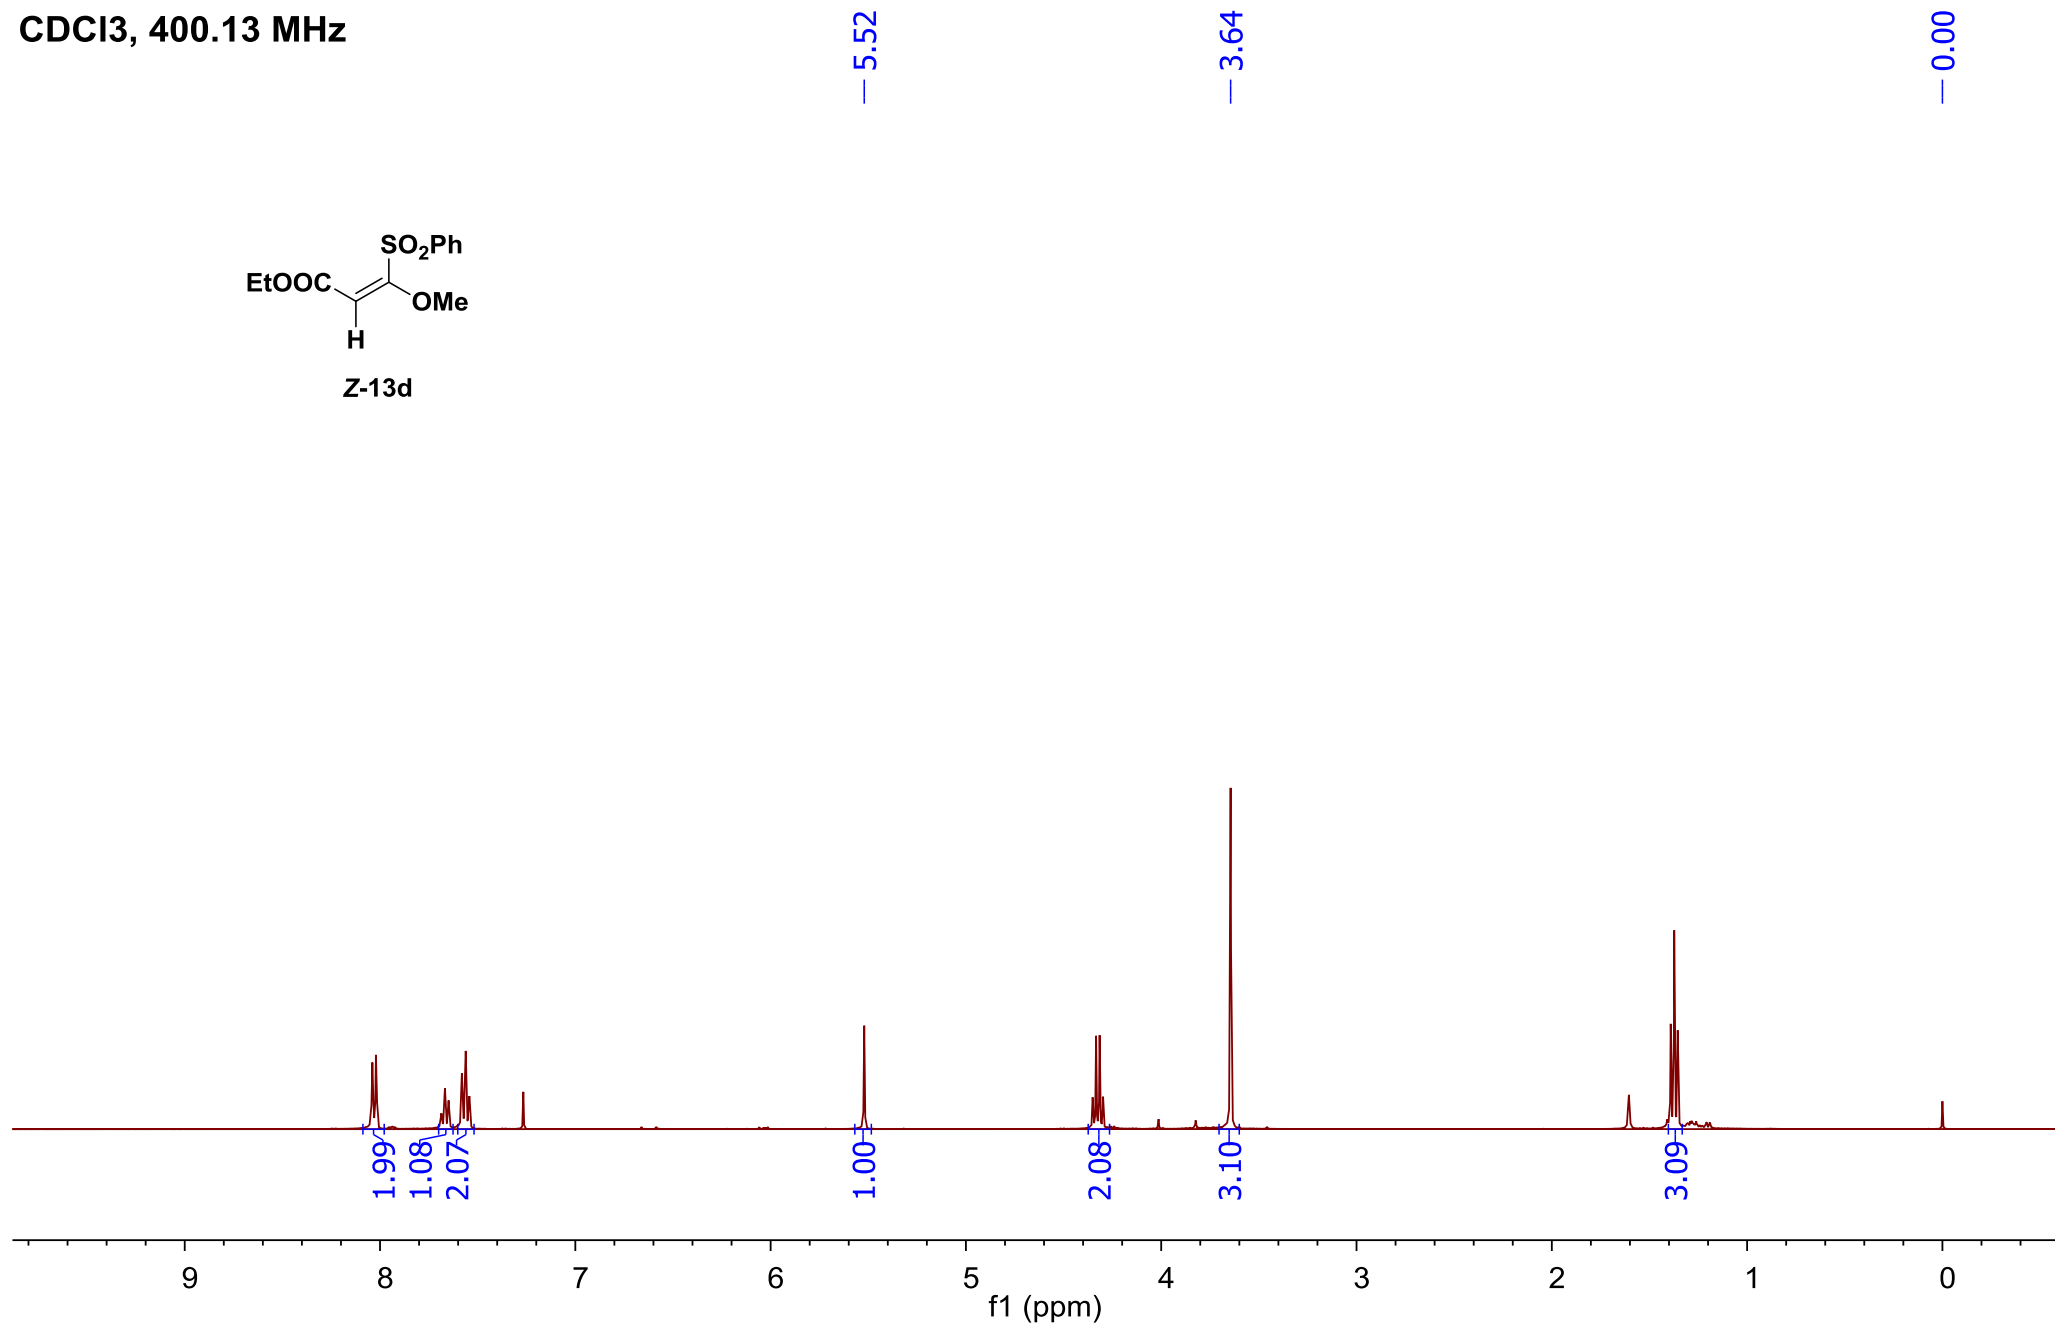

<sup>1</sup>H NMR Spectrum of Z-13d

CDCl<sub>3</sub>, 100.61 MHz

— 164.39  
— 159.94

— 138.14  
— 134.32  
— 129.18  
— 129.16

— 100.48

— 62.00  
— 57.98

— 14.15

— 129.18  
— 129.16

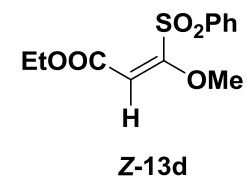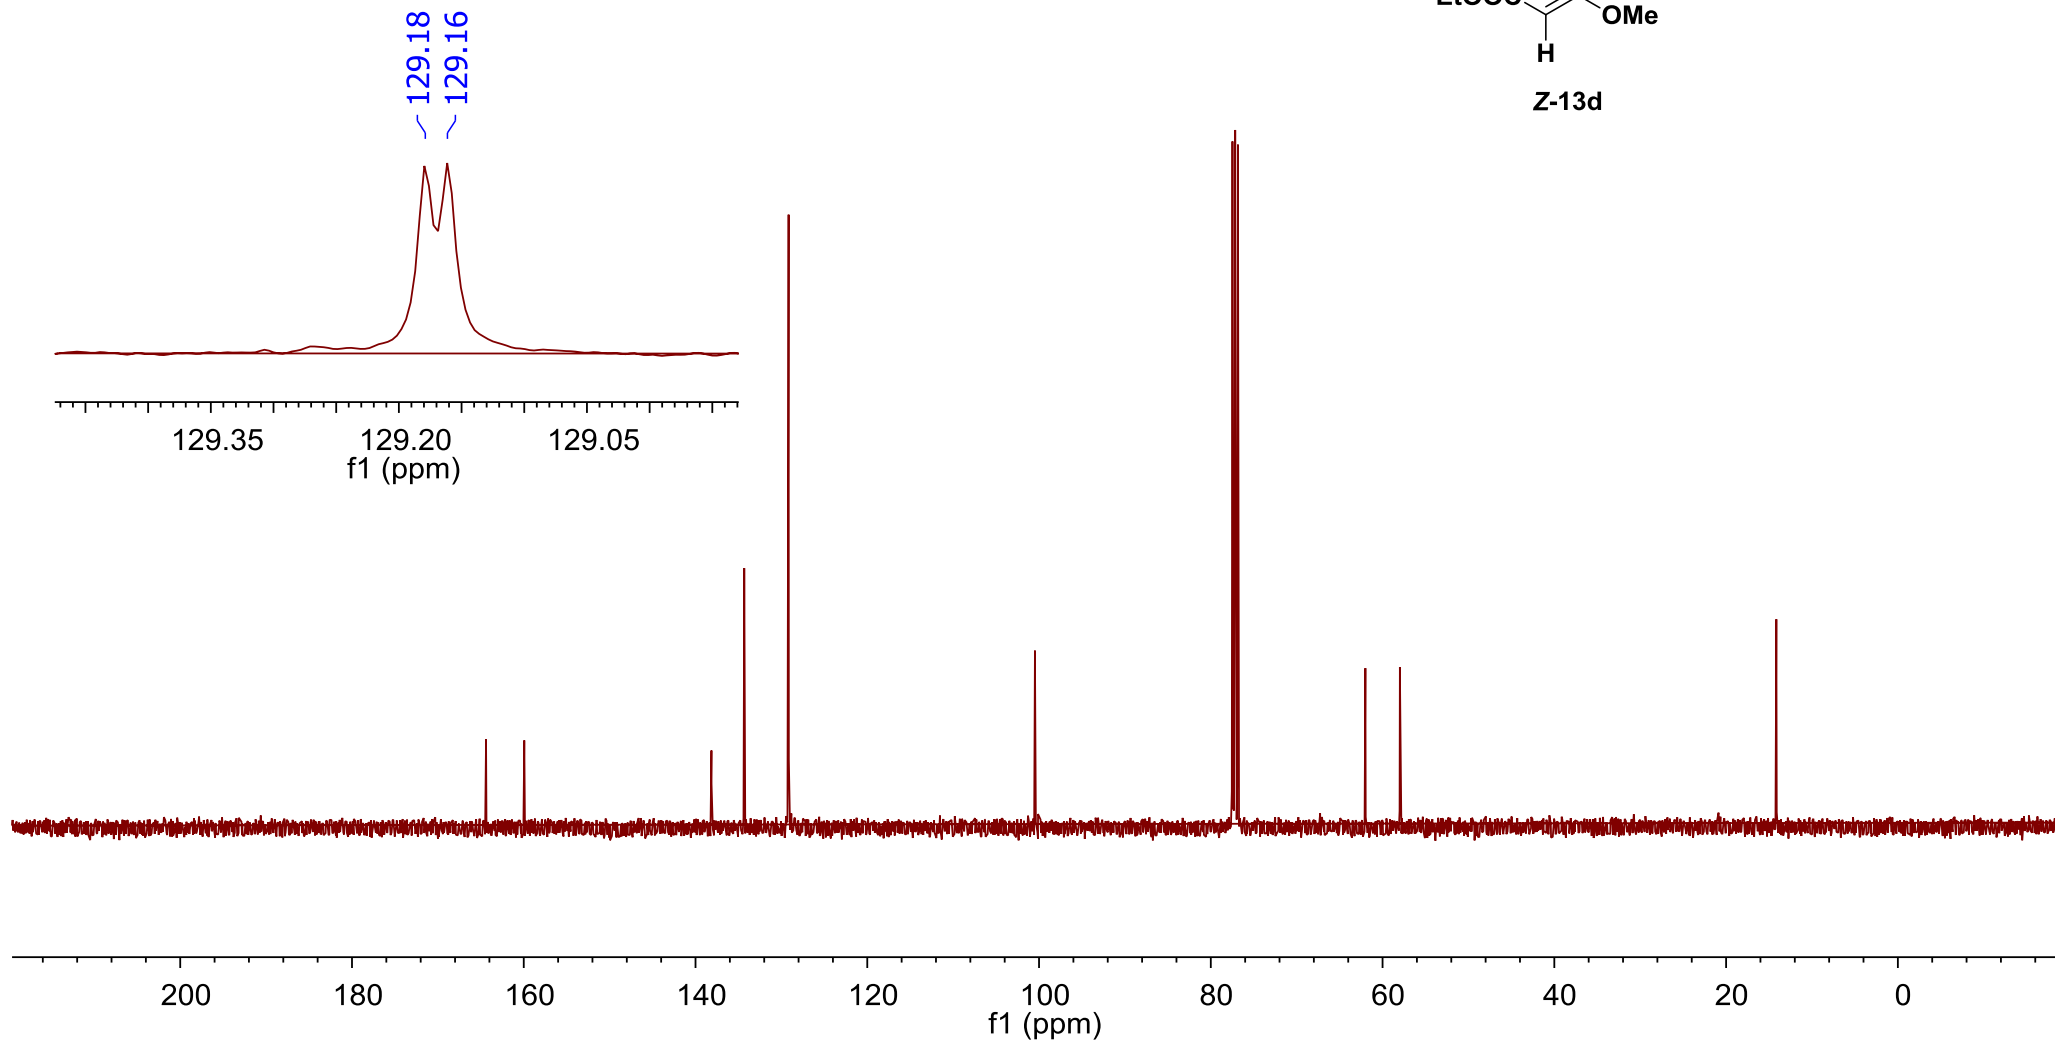

<sup>13</sup>C NMR Spectrum of Z-13d

CDCl<sub>3</sub>, 400.13 MHz

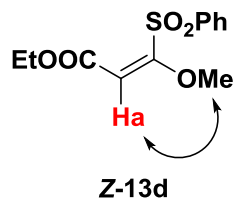

— 5.52

— 3.65

Ha

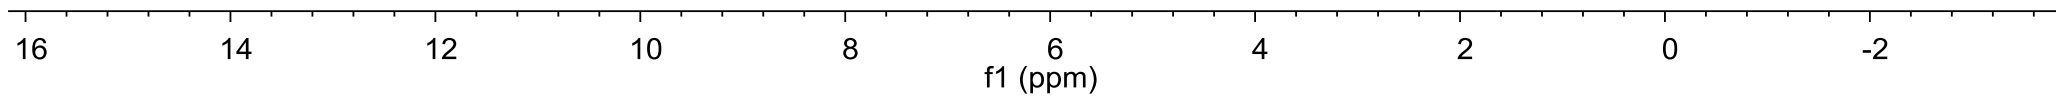

1D-NOE Spectrum of **Z-13d**

CDCl<sub>3</sub>, 400.13 MHz

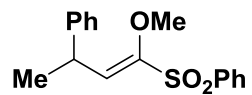

*E*-13e

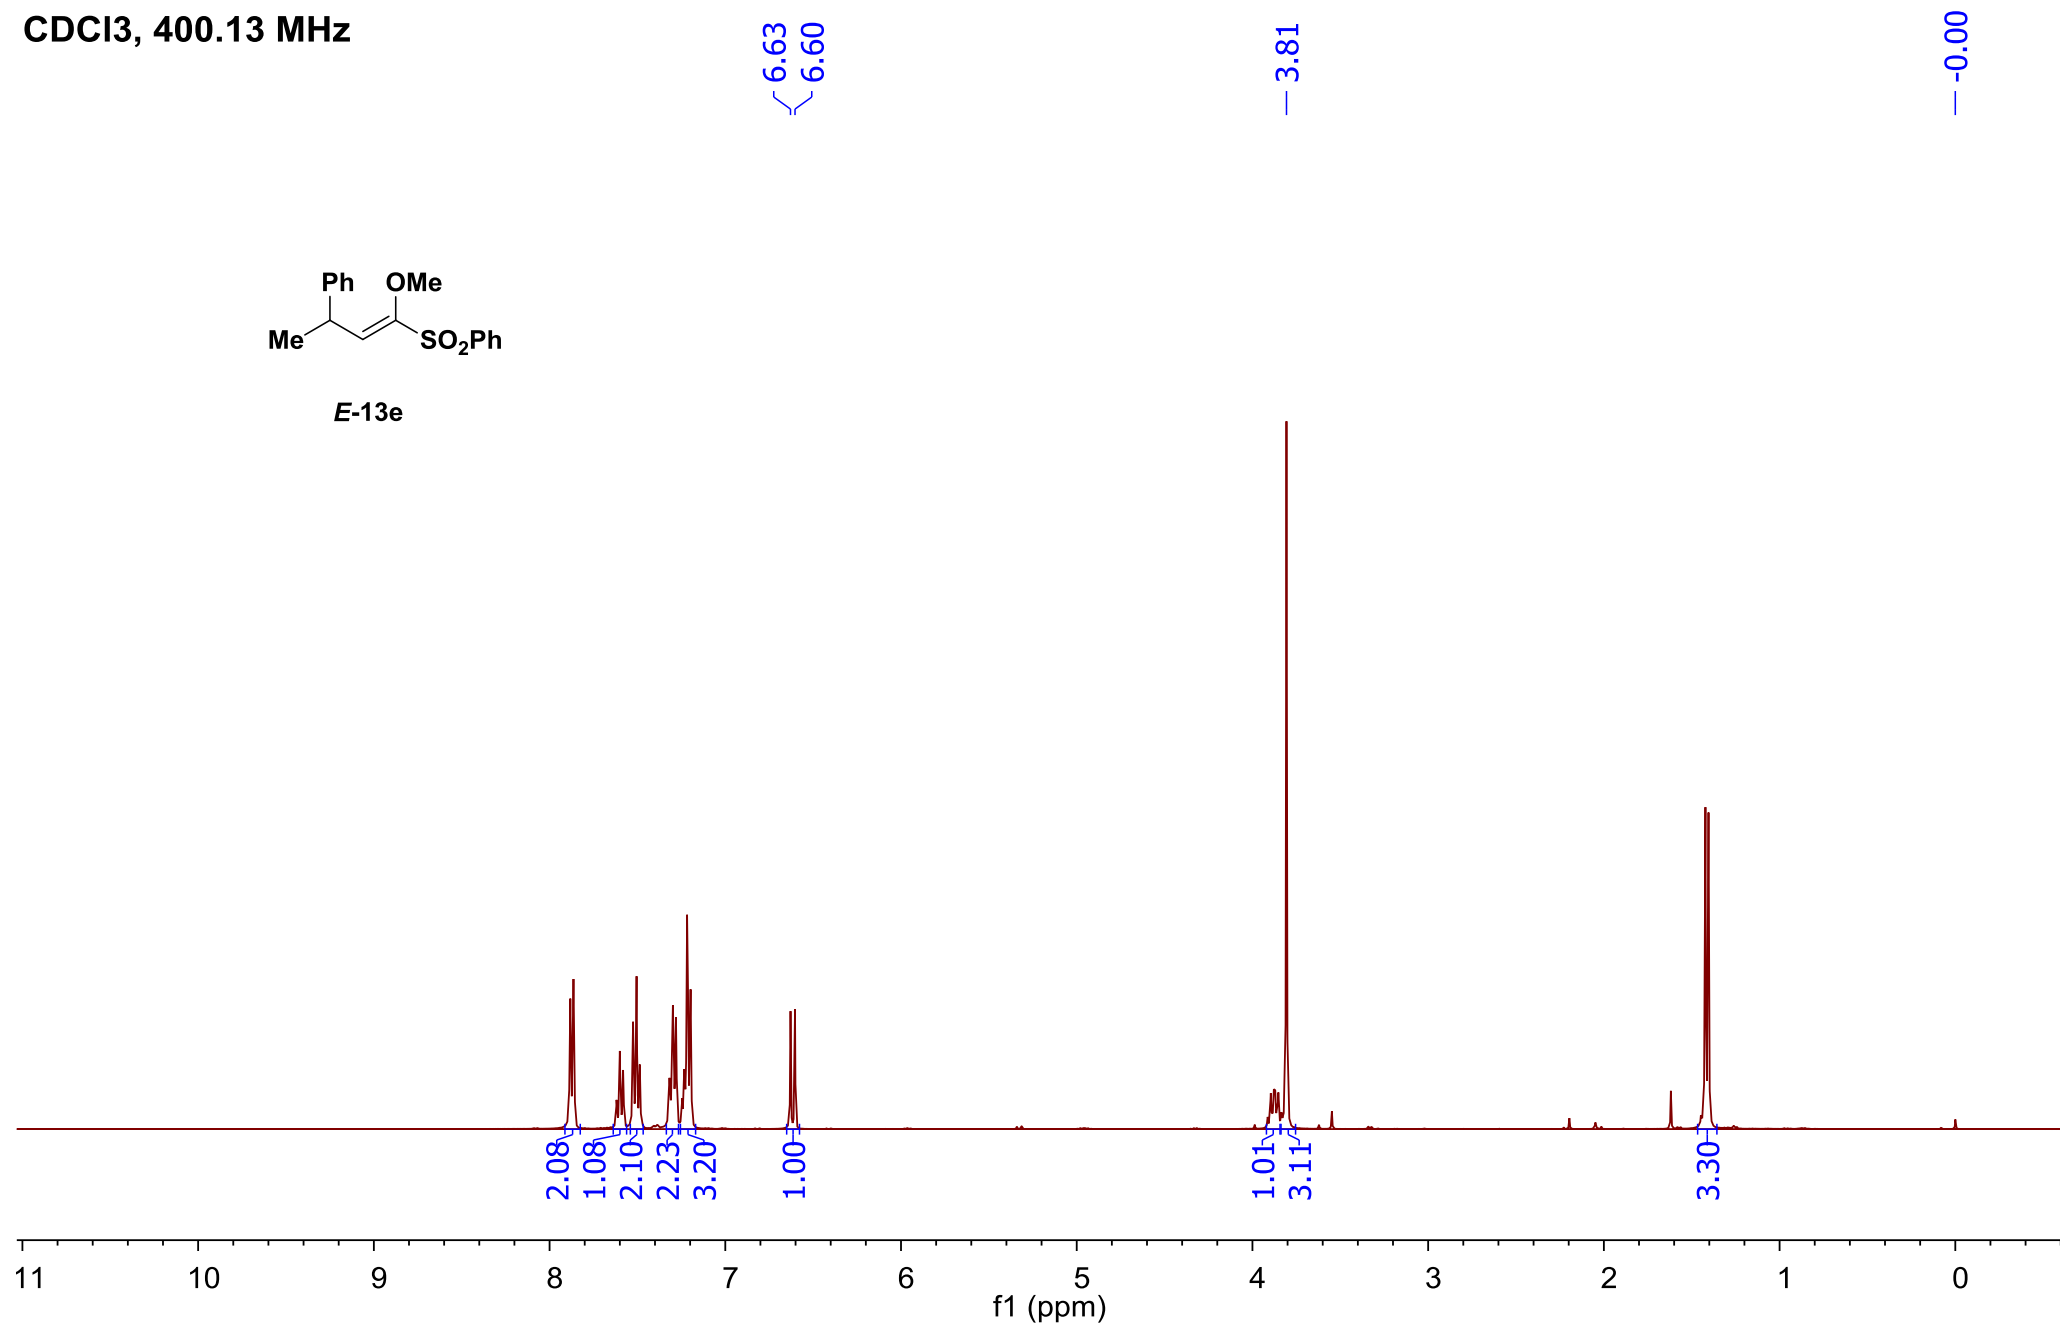

<sup>1</sup>H NMR Spectrum of *E*-13e

CDCl<sub>3</sub>, 100.61 MHz

152.48  
143.54  
139.09  
133.63  
130.94  
129.18  
128.90  
128.30  
126.92

63.51

36.33

21.77

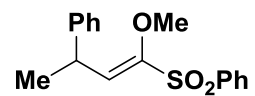

*E*-13e

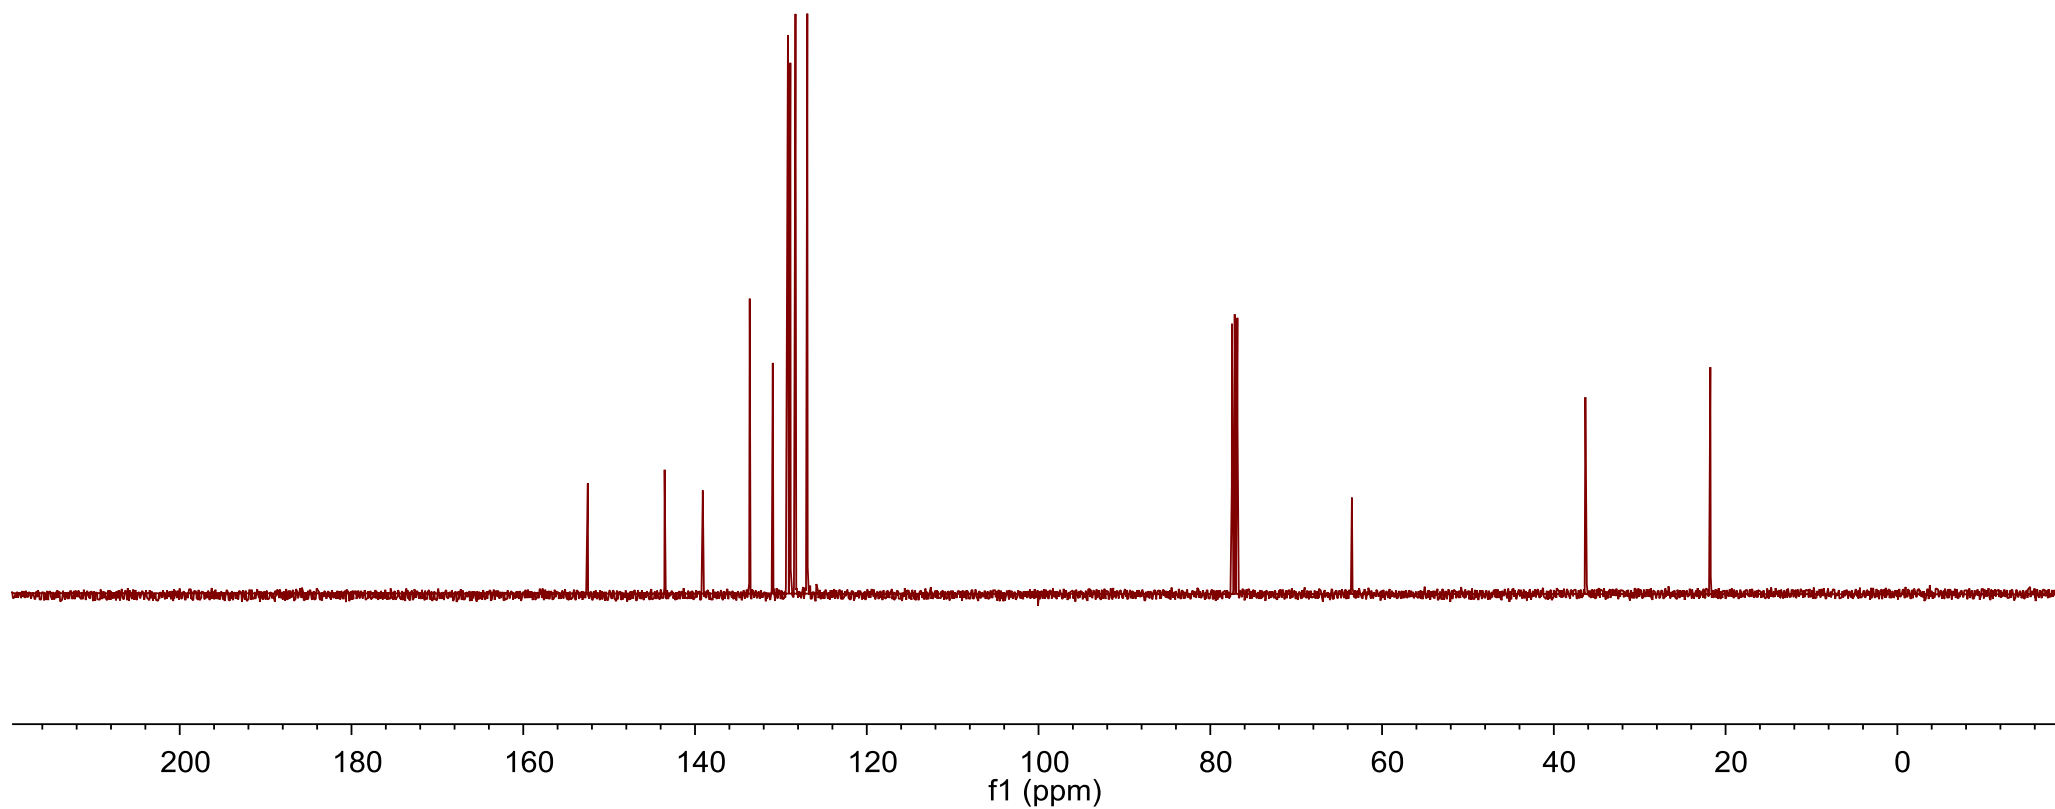

<sup>13</sup>C NMR Spectrum of *E*-13e

CDCl<sub>3</sub>, 400.13 MHz

6.63  
6.60

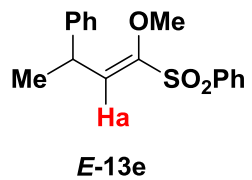

Ha

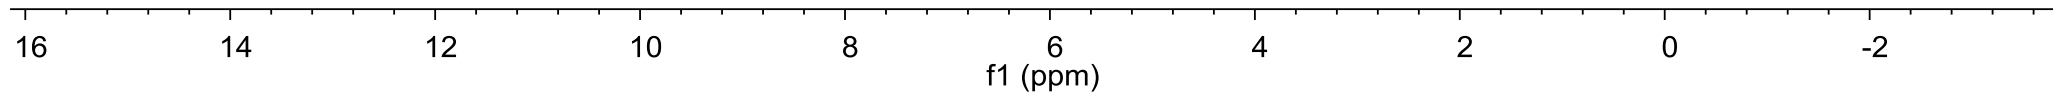

1D-NOE Spectrum of *E*-13e



CDCl<sub>3</sub>, 400.13 MHz

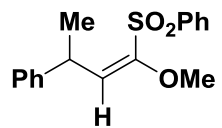

Z-13e

5.34  
5.31

3.55

-0.00

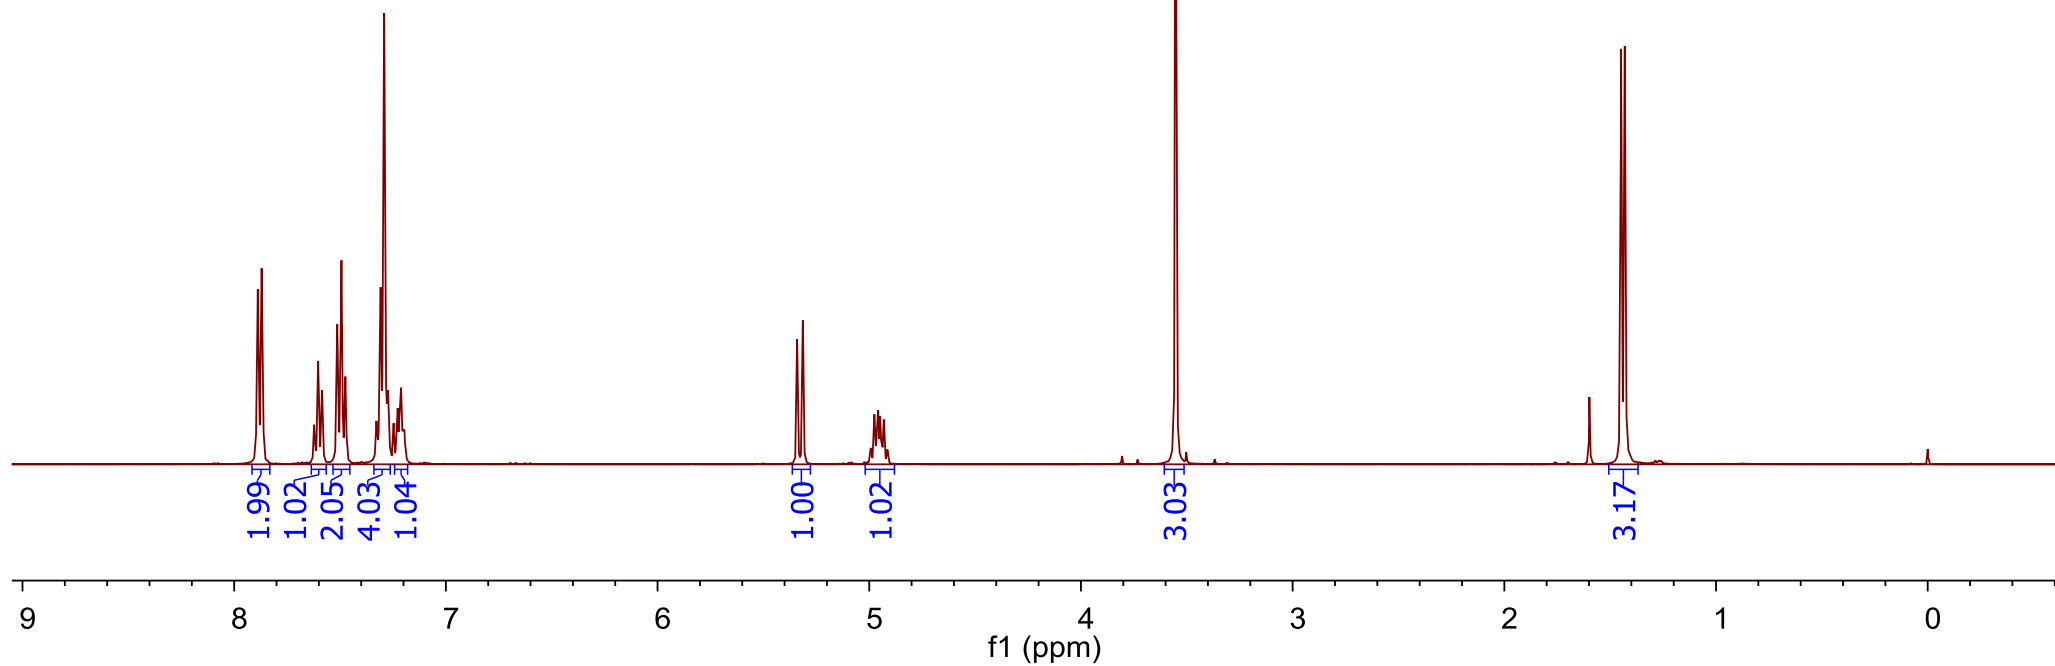

<sup>1</sup>H NMR Spectrum of Z-13e

CDCl<sub>3</sub>, 100.61 MHz

151.56  
145.08  
139.80  
133.71  
129.07  
128.75  
128.26  
127.00  
126.59  
119.55

— 58.41

— 34.79

— 22.47

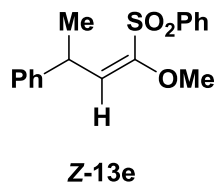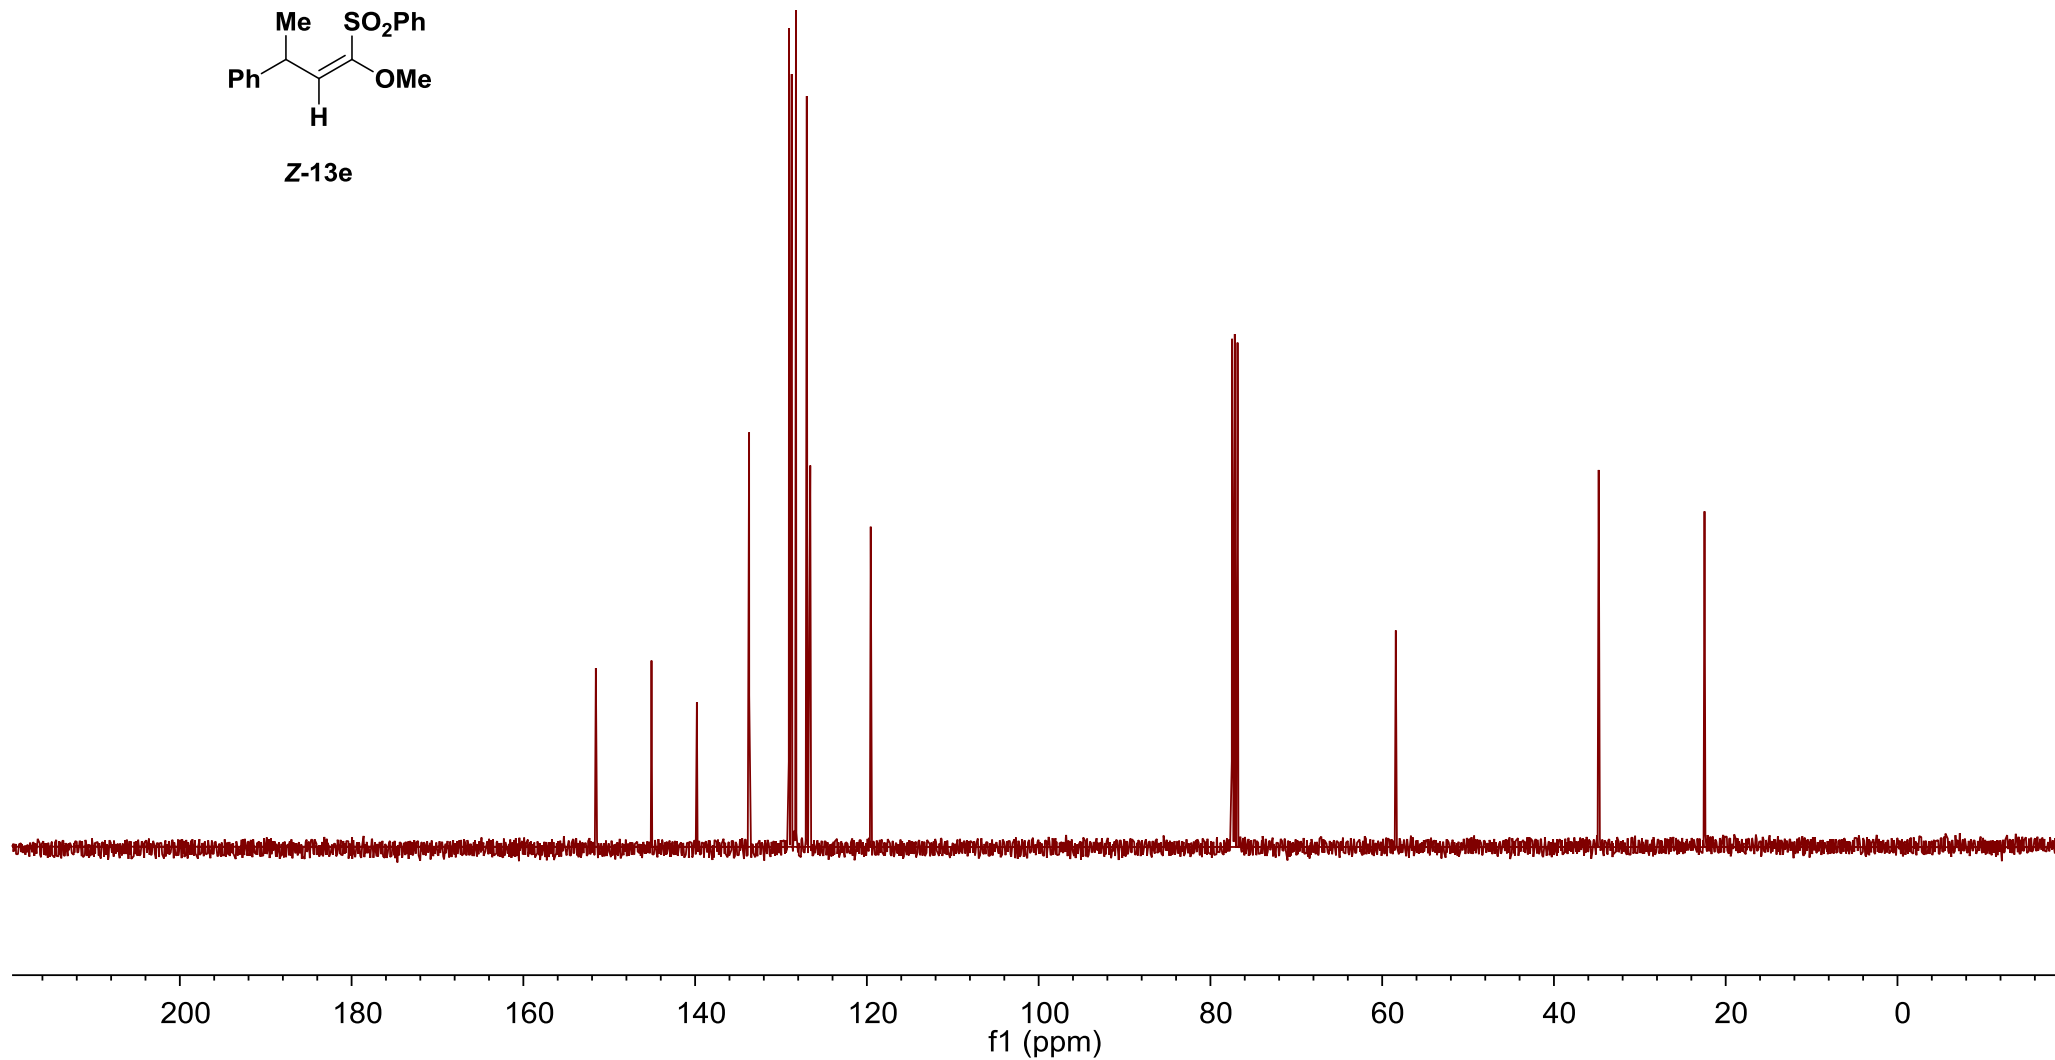

<sup>13</sup>C NMR Spectrum of **Z-13e**

CDCl<sub>3</sub>, 400.13 MHz

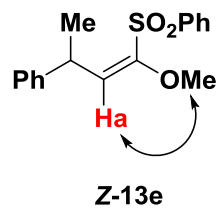

5.34  
5.31

3.55

Ha

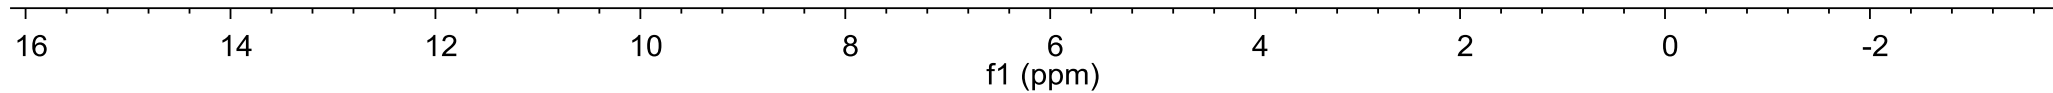

1D-NOE Spectrum of **Z-13e**

CDCl<sub>3</sub>, 400.13 MHz

— 6.38

— 5.44

— 3.87

— 3.52

— -0.00

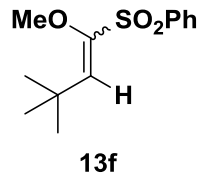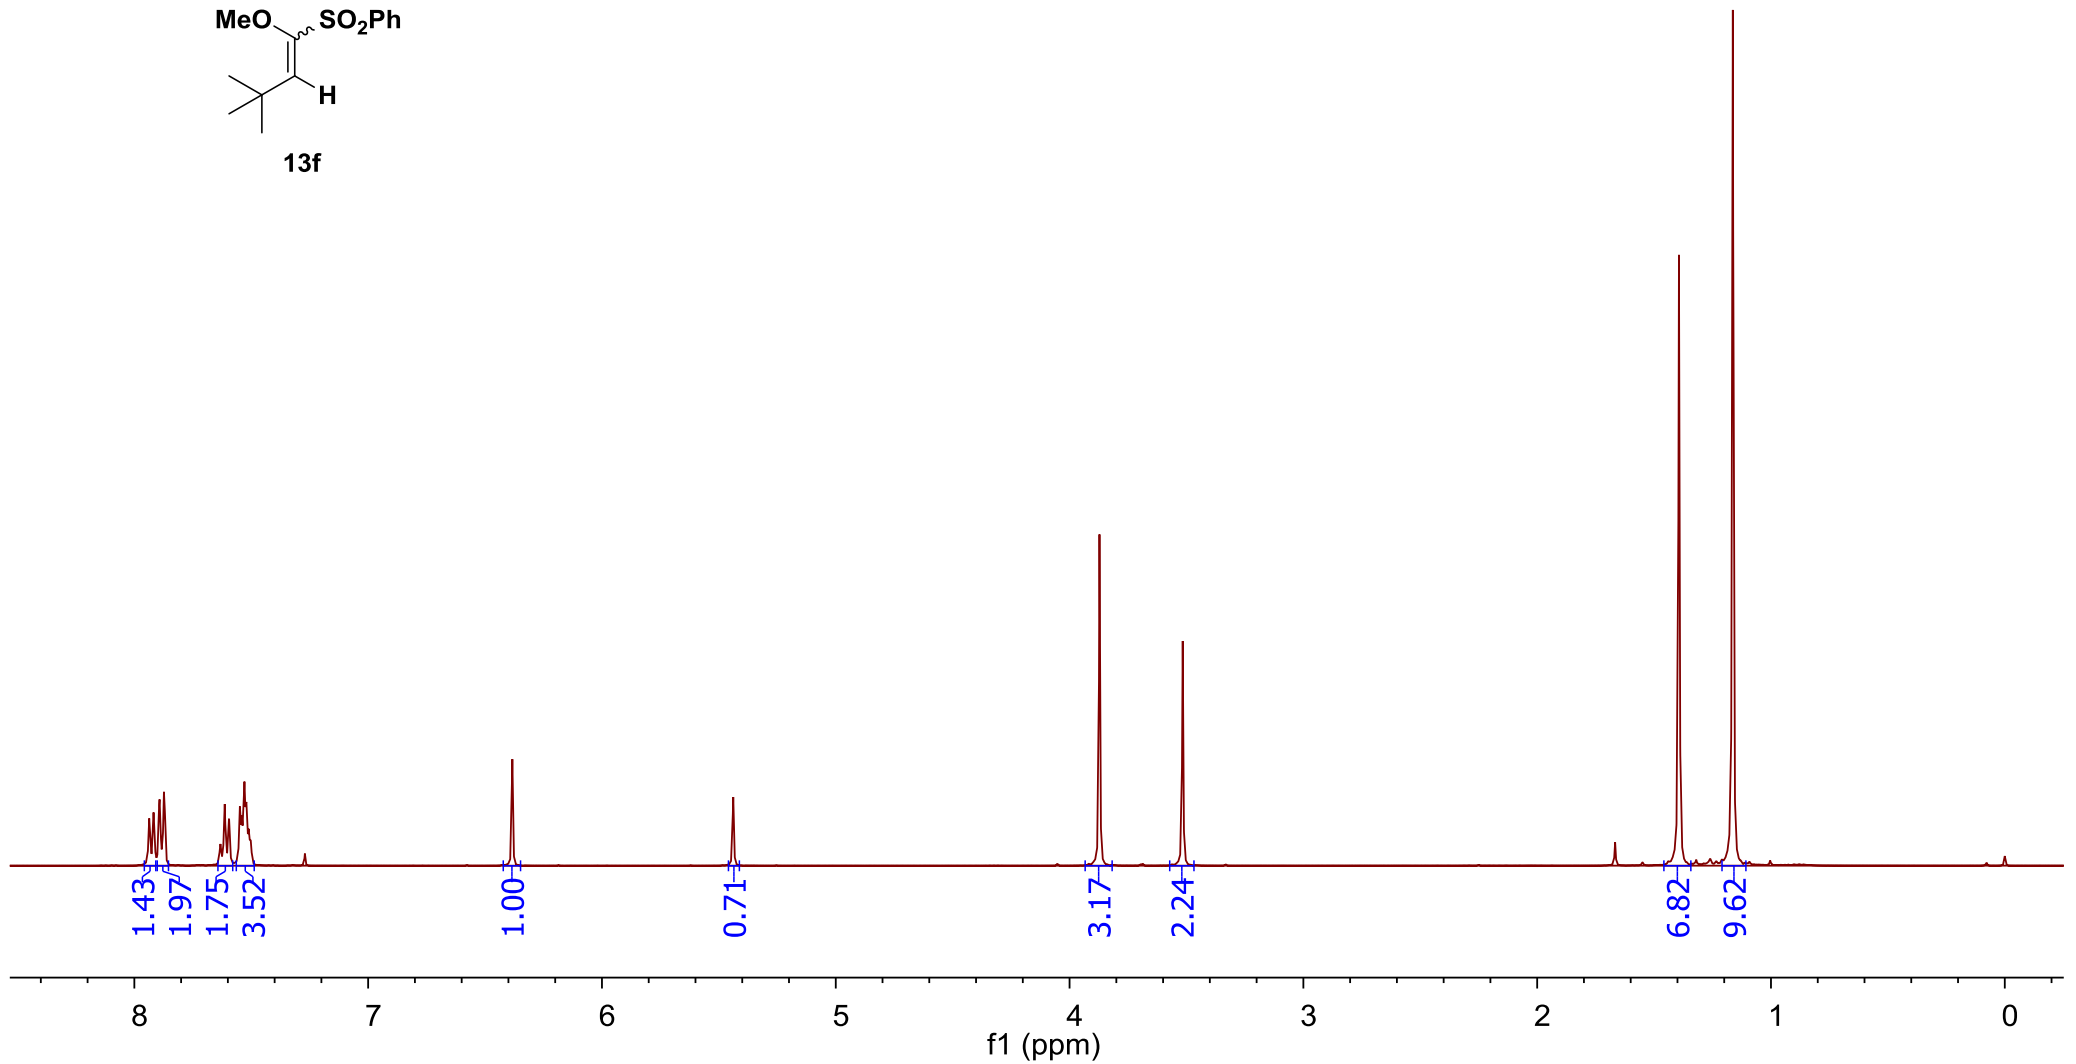

CDCl<sub>3</sub>, 100.61 MHz

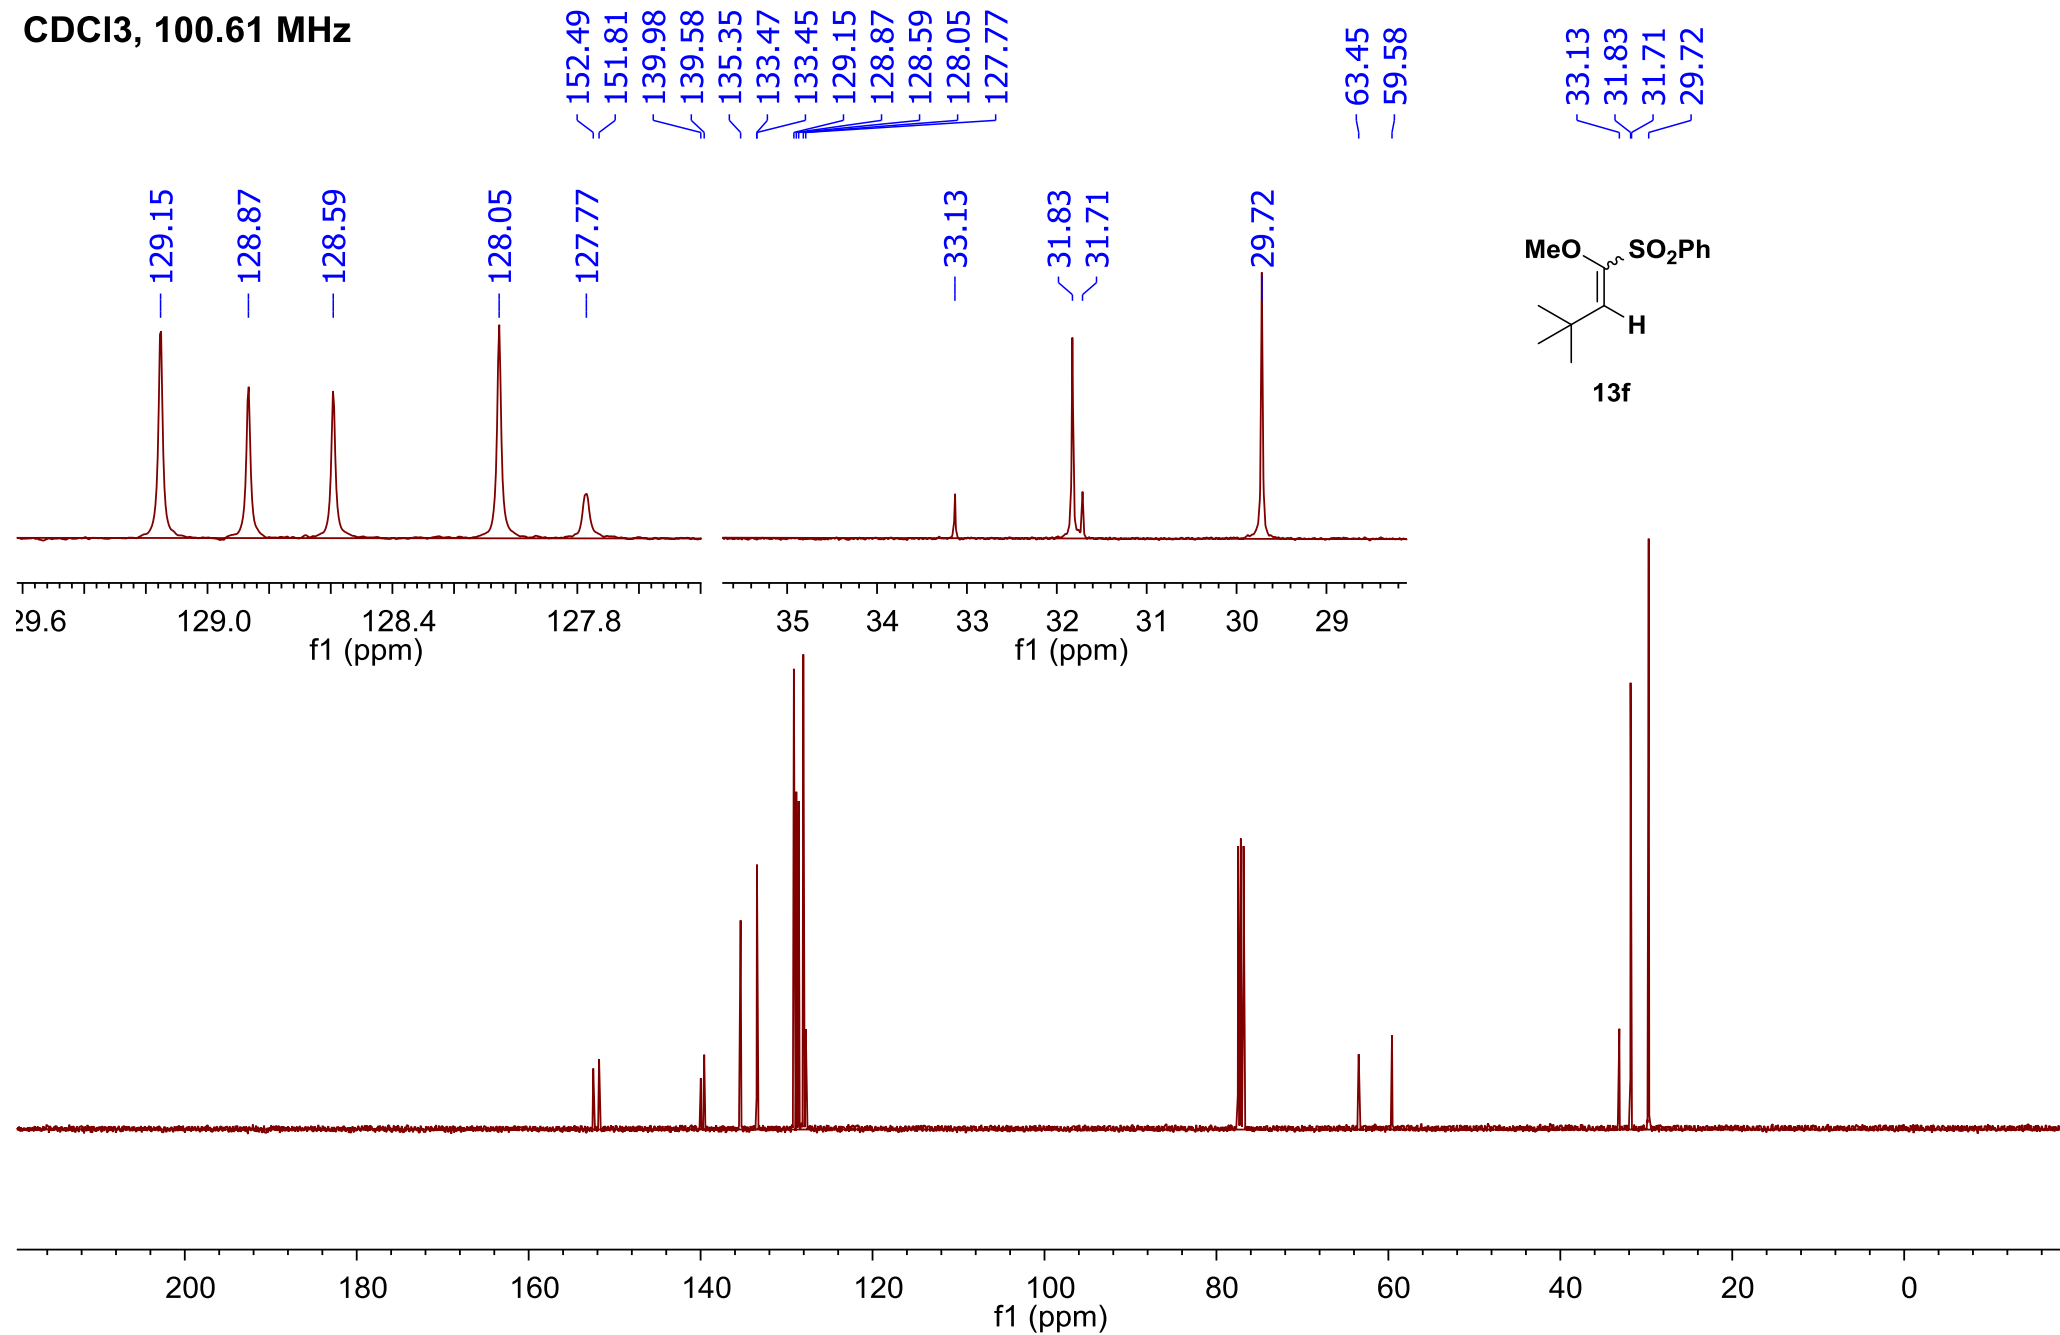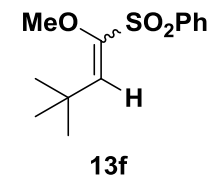

<sup>13</sup>C NMR Spectrum of **13f**

CDCl<sub>3</sub>, 400.13 MHz

— 6.31

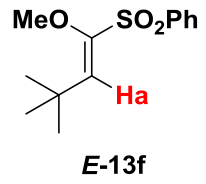

Ha

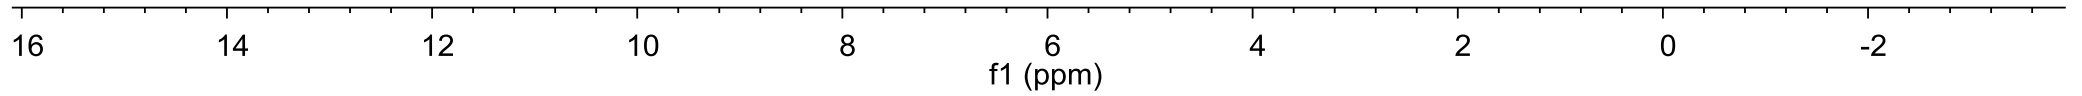

1D-NOE Spectrum of *E*-13f

CDCl<sub>3</sub>, 400.13 MHz

— 5.44

— 3.52

— 0.00

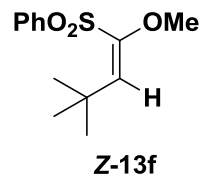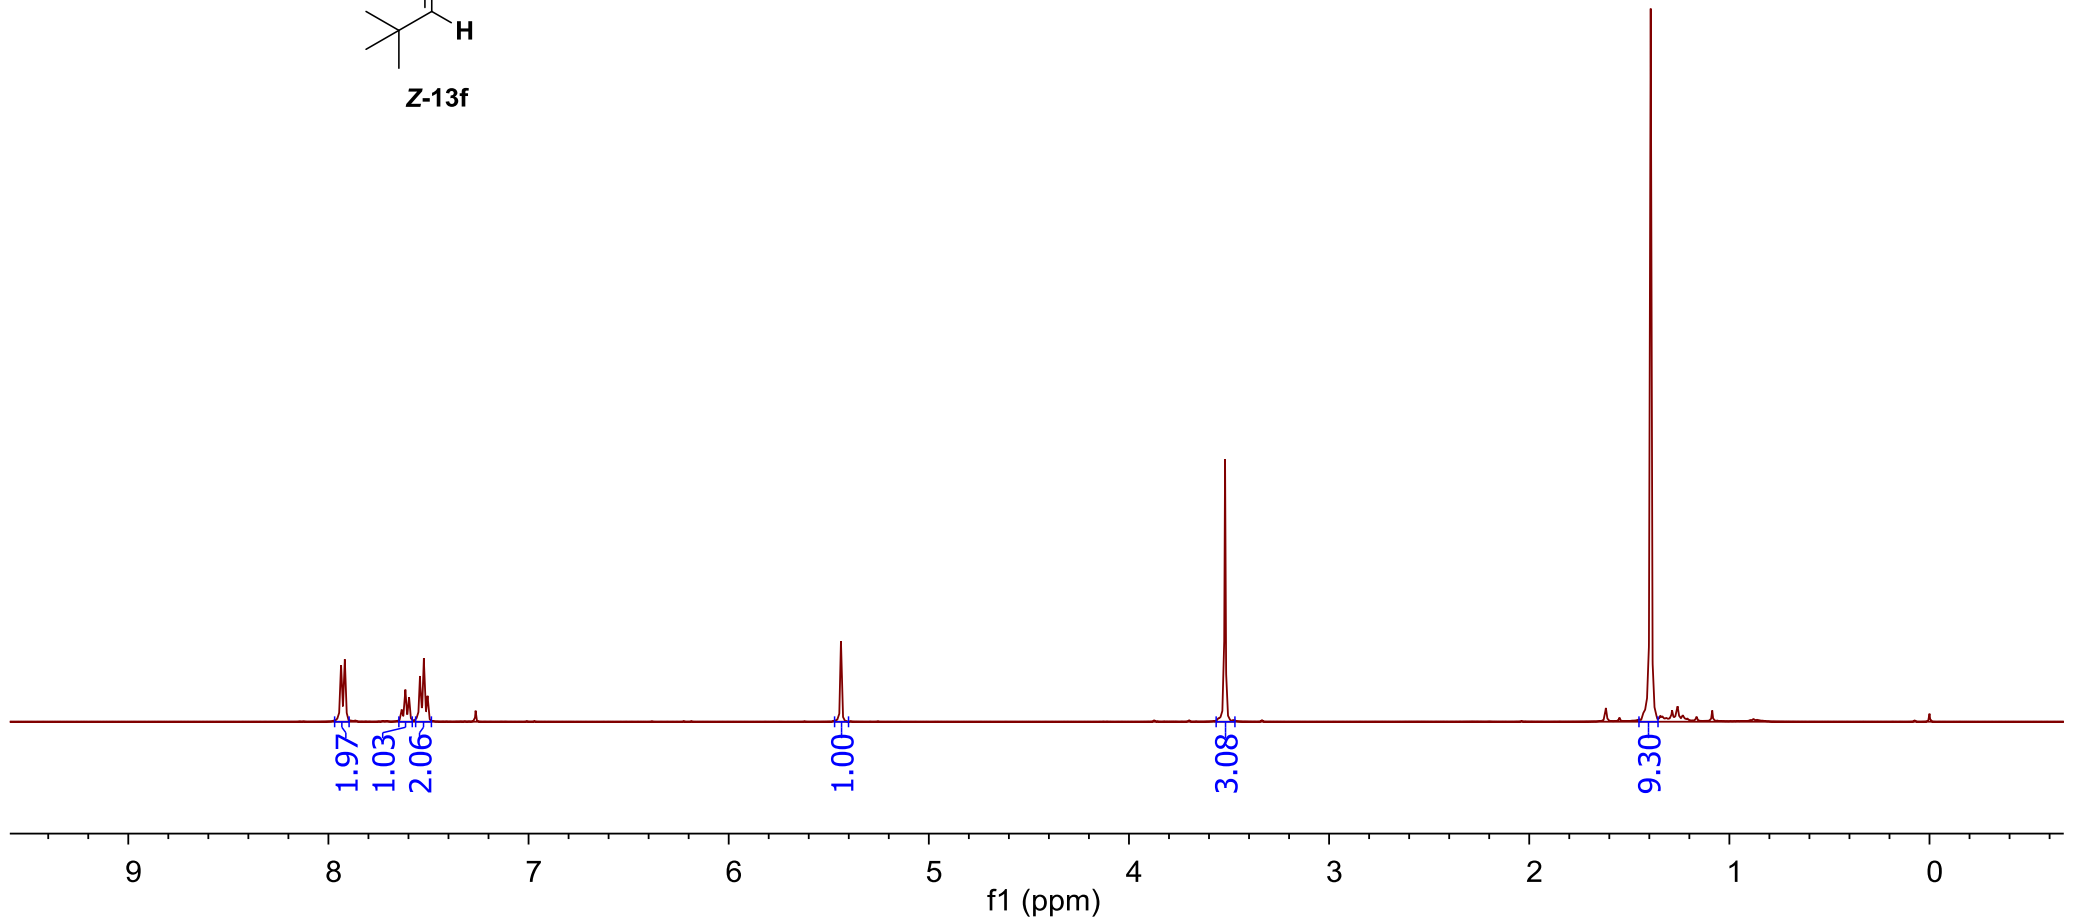

<sup>1</sup>H NMR Spectrum **Z-13f**

CDCl<sub>3</sub>, 100.61 MHz

152.51

140.01

133.49

128.89

128.63

127.86

59.62

31.85  
31.75

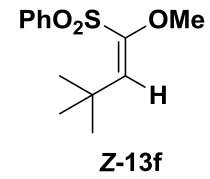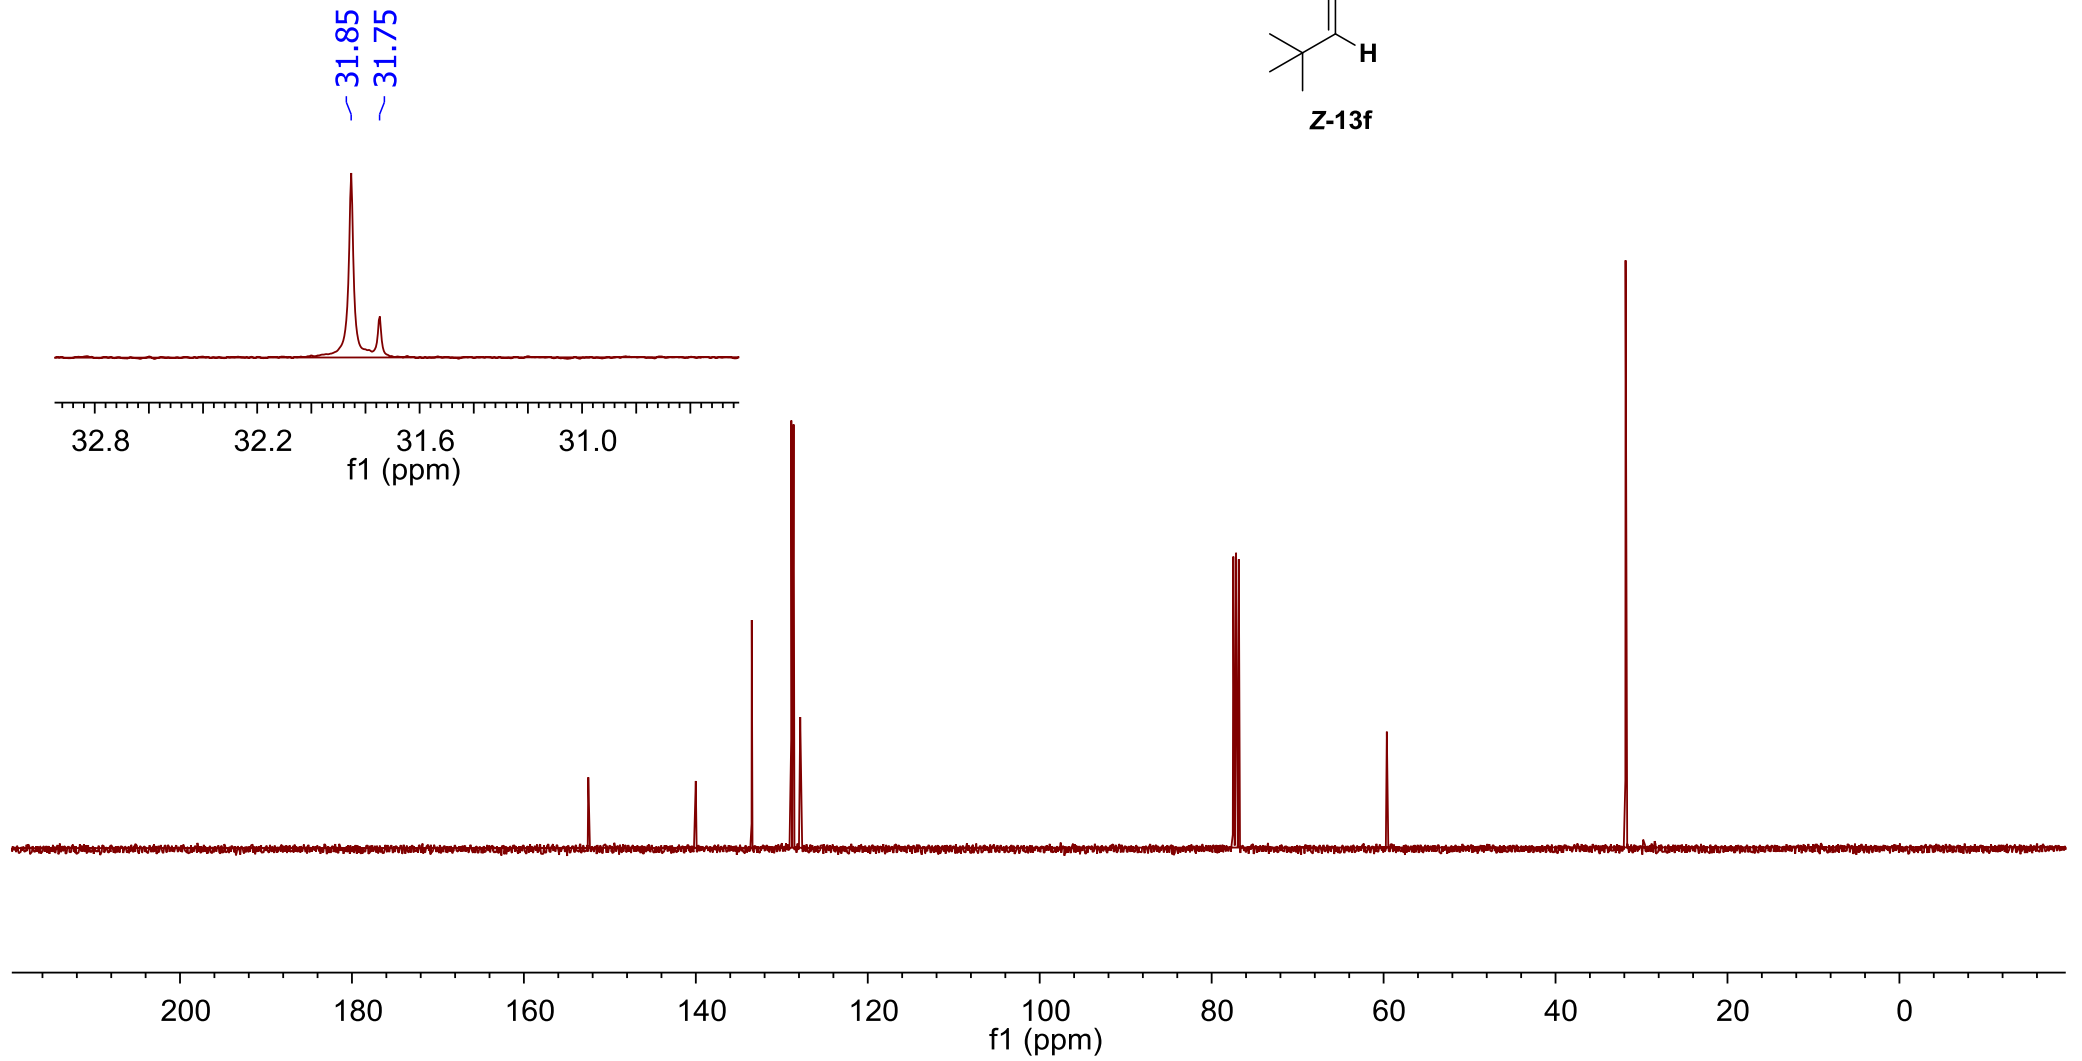

<sup>13</sup>C NMR Spectrum of **Z-13f**



CDCl<sub>3</sub>, 400.13 MHz

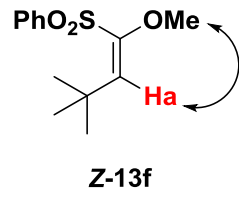

— 5.44

— 3.52

— 1.39

**Ha**

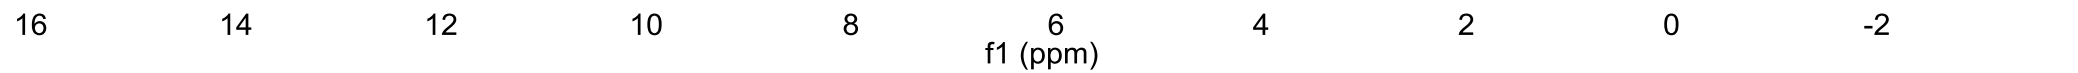

1D-NOE Spectrum of **Z-13f**

CDCl<sub>3</sub>, 400.13 MHz

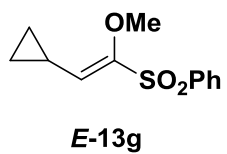

5.89  
5.87

3.87

0.00

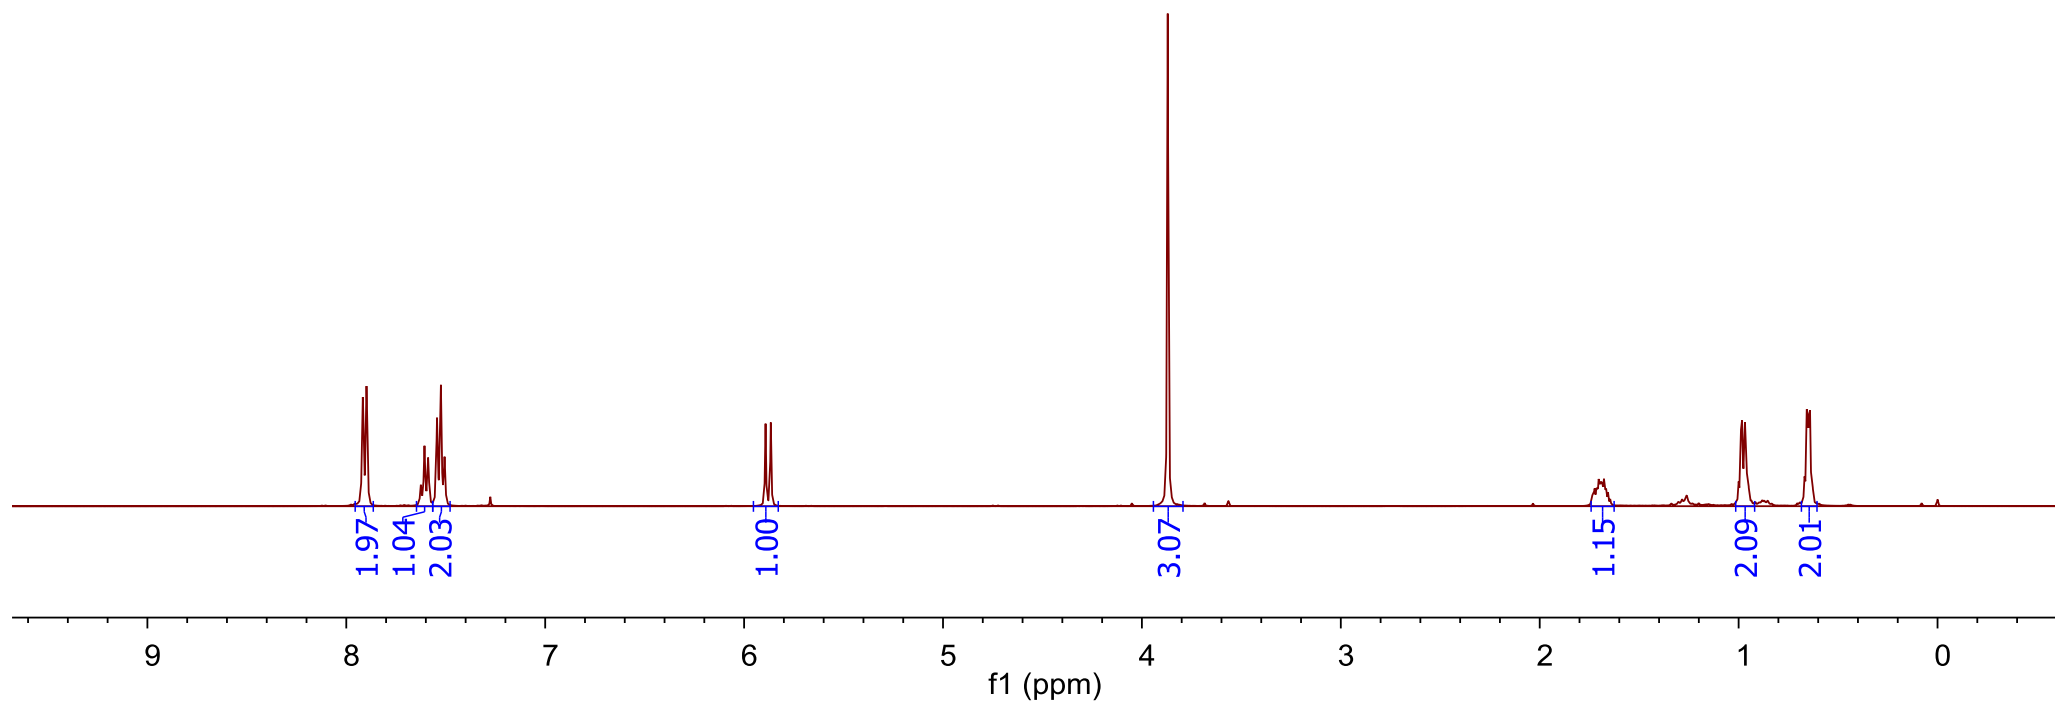

<sup>1</sup>H NMR Spectrum of *E*-13g

CDCl<sub>3</sub>, 100.61 MHz

152.57  
139.32  
133.43  
132.42  
129.09  
128.23

63.24

9.02  
8.41

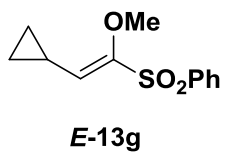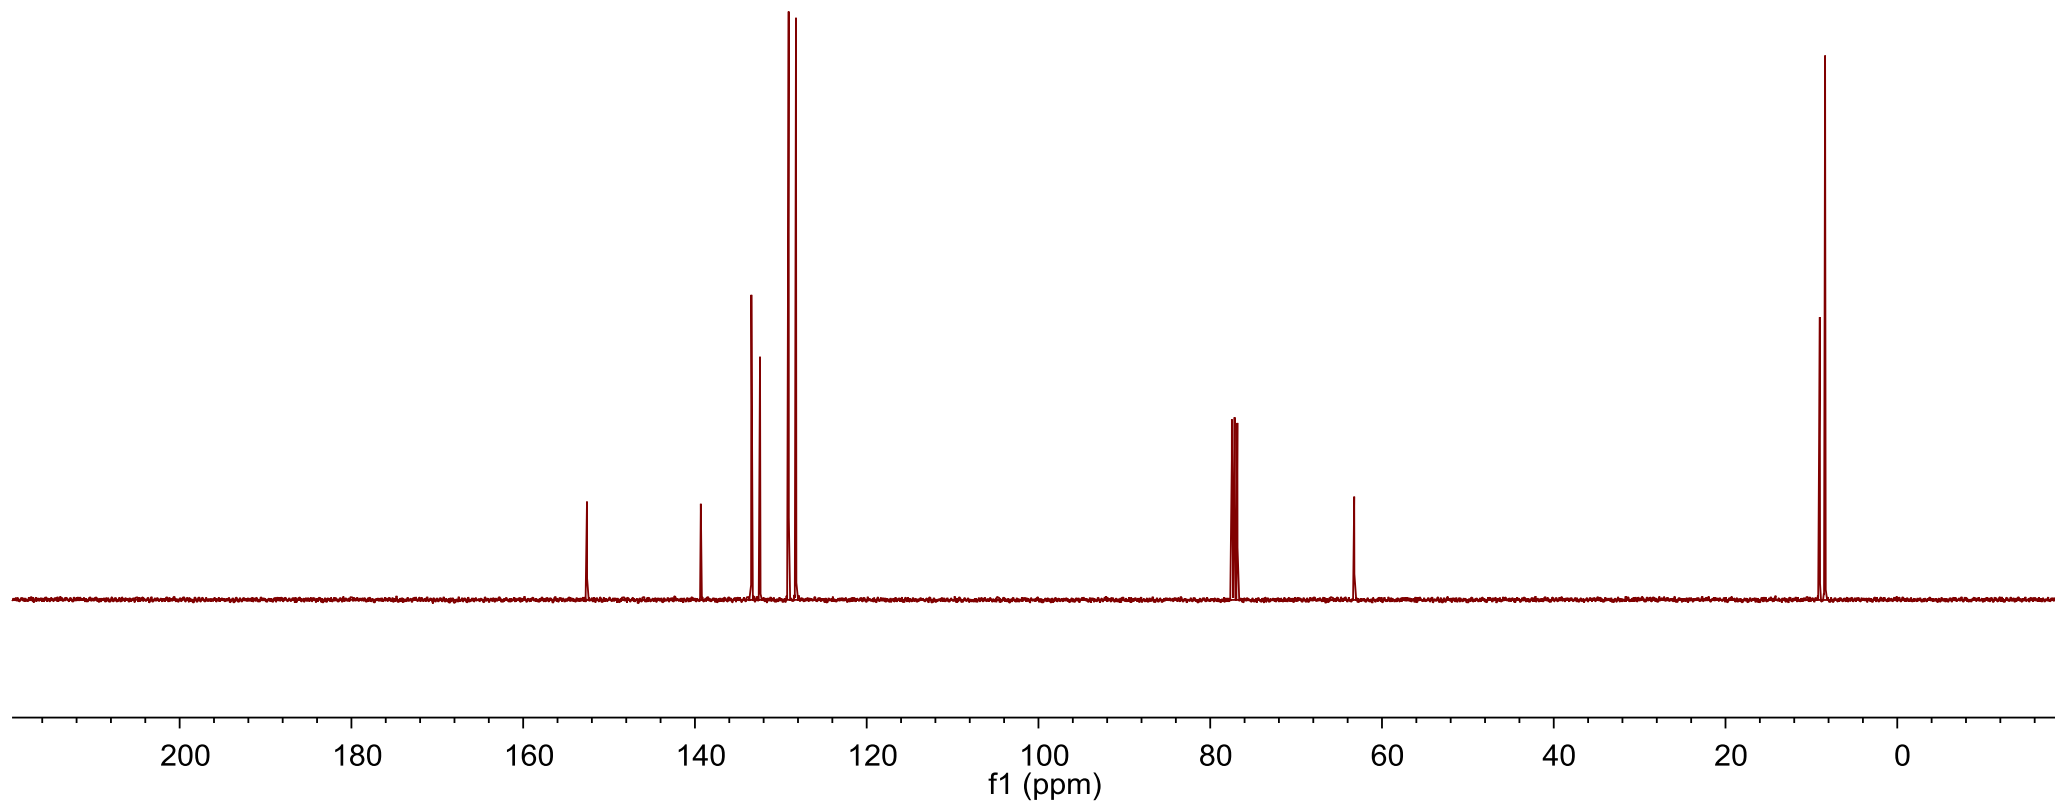

CDCl<sub>3</sub>, 400.13 MHz

5.89  
5.87

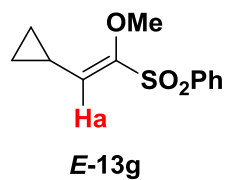

Ha

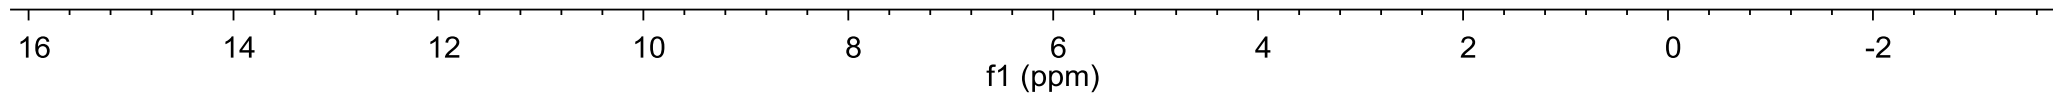

1D-NOE Spectrum of *E*-13g

CDCl<sub>3</sub>, 400.13 MHz

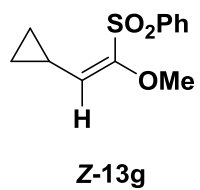

4.75  
4.72

3.57

-0.00

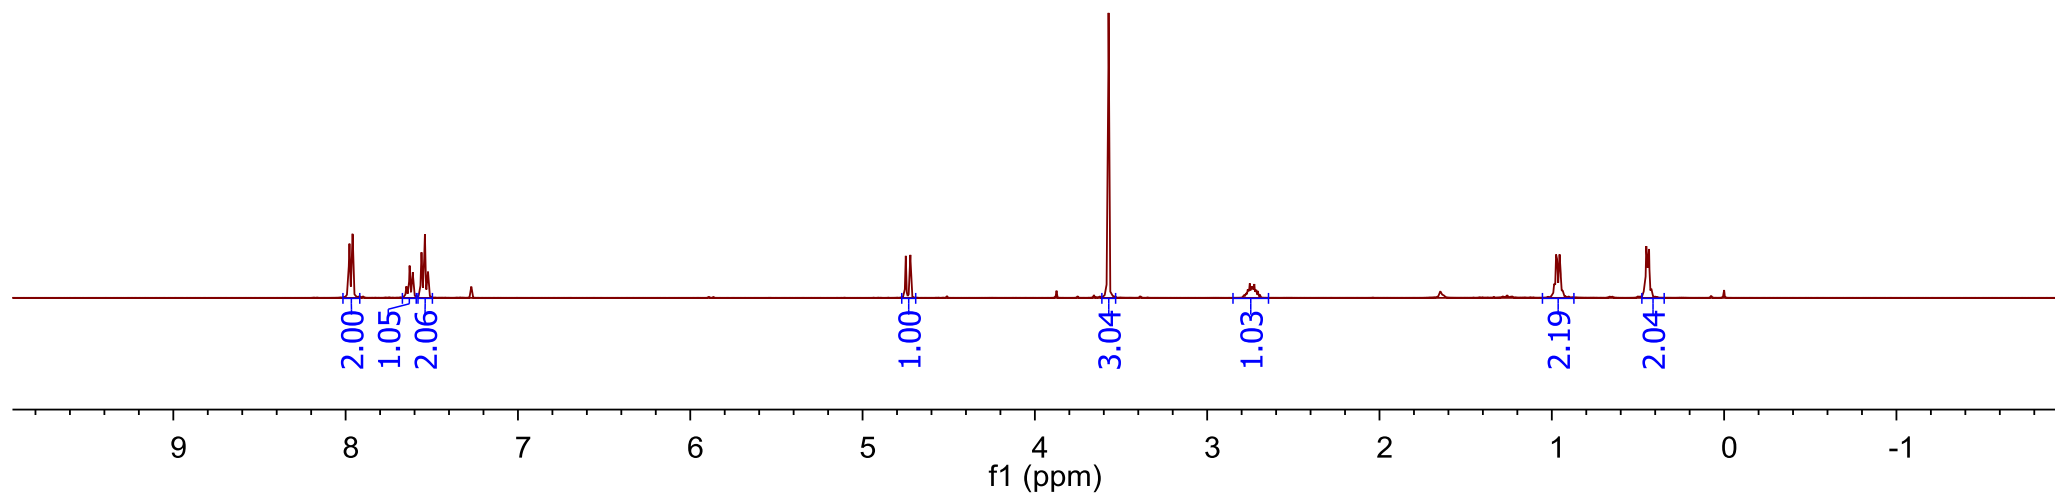

<sup>1</sup>H NMR Spectrum of Z-13g

CDCl<sub>3</sub>, 100.61 MHz

— 151.81

~ 140.21

/ 133.57

/ 129.06

~ 128.09

~ 124.05

— 59.78

< 8.60  
< 8.07

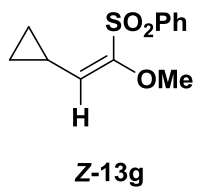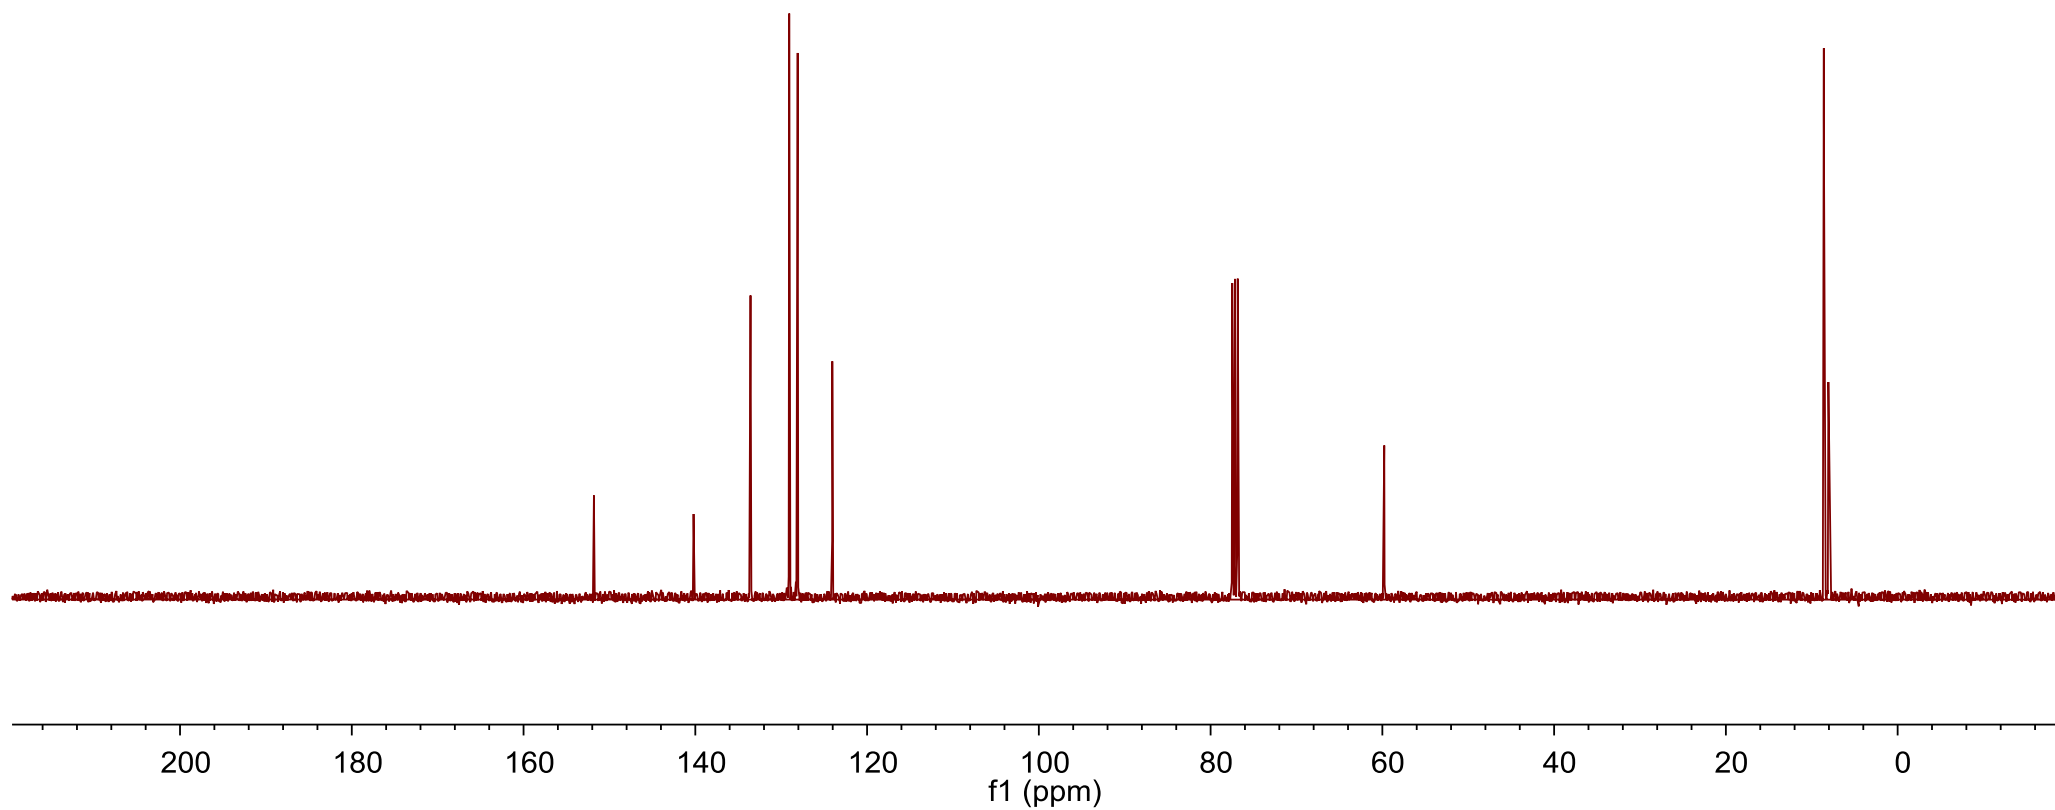

<sup>13</sup>C NMR Spectrum Z-13g

CDCl<sub>3</sub>, 400.13 MHz

4.75  
4.72

3.57

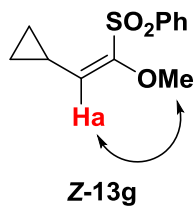

Ha

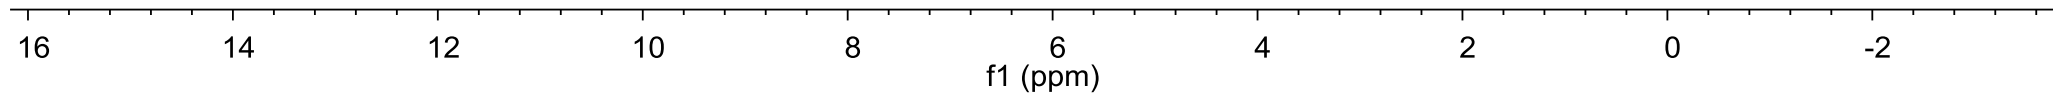

1D-NOE Spectrum of **Z-13g**

CDCl<sub>3</sub>, 400.13 MHz

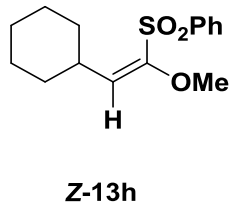

5.11  
5.09

3.55

-0.00

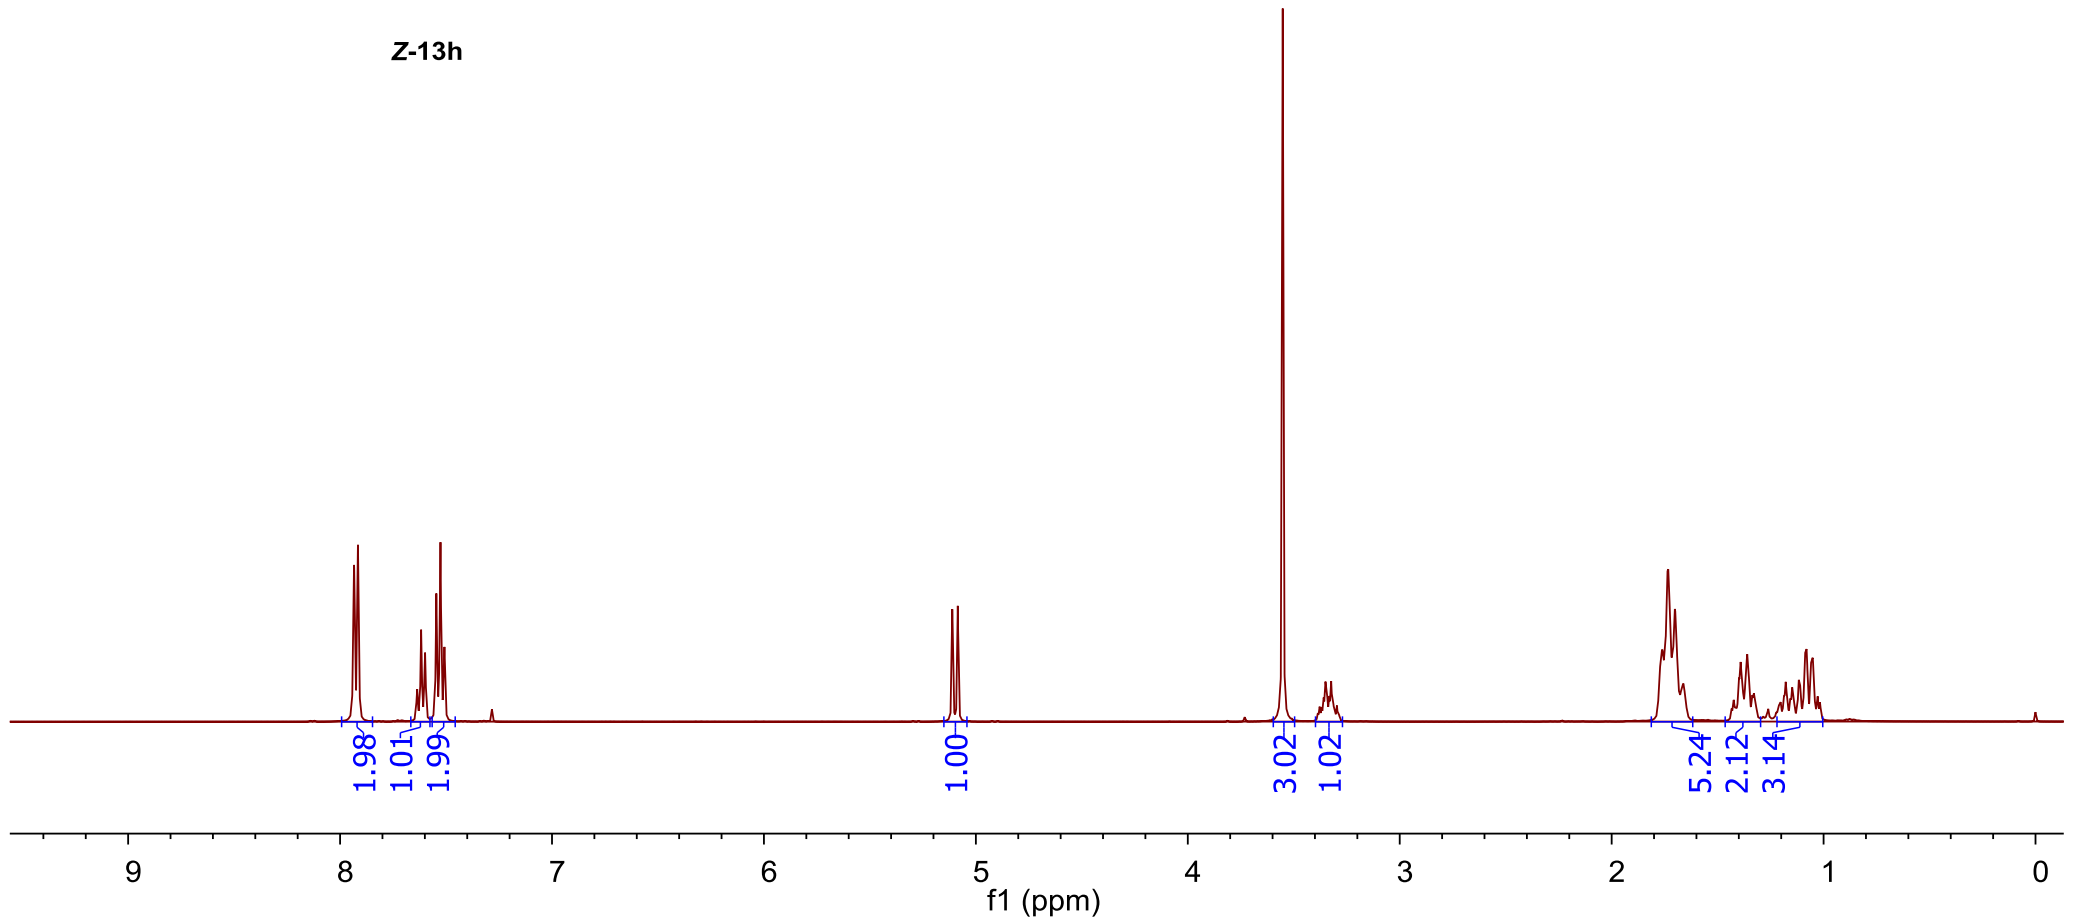

<sup>1</sup>H NMR Spectrum of **Z-13h**



CDCl<sub>3</sub>, 100.61 MHz

151.49  
140.08  
133.52  
128.96  
128.08  
120.88

58.50

34.23  
33.91  
25.81  
25.60

34.23  
33.91

25.81  
25.60

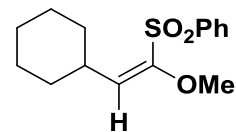

Z-13h

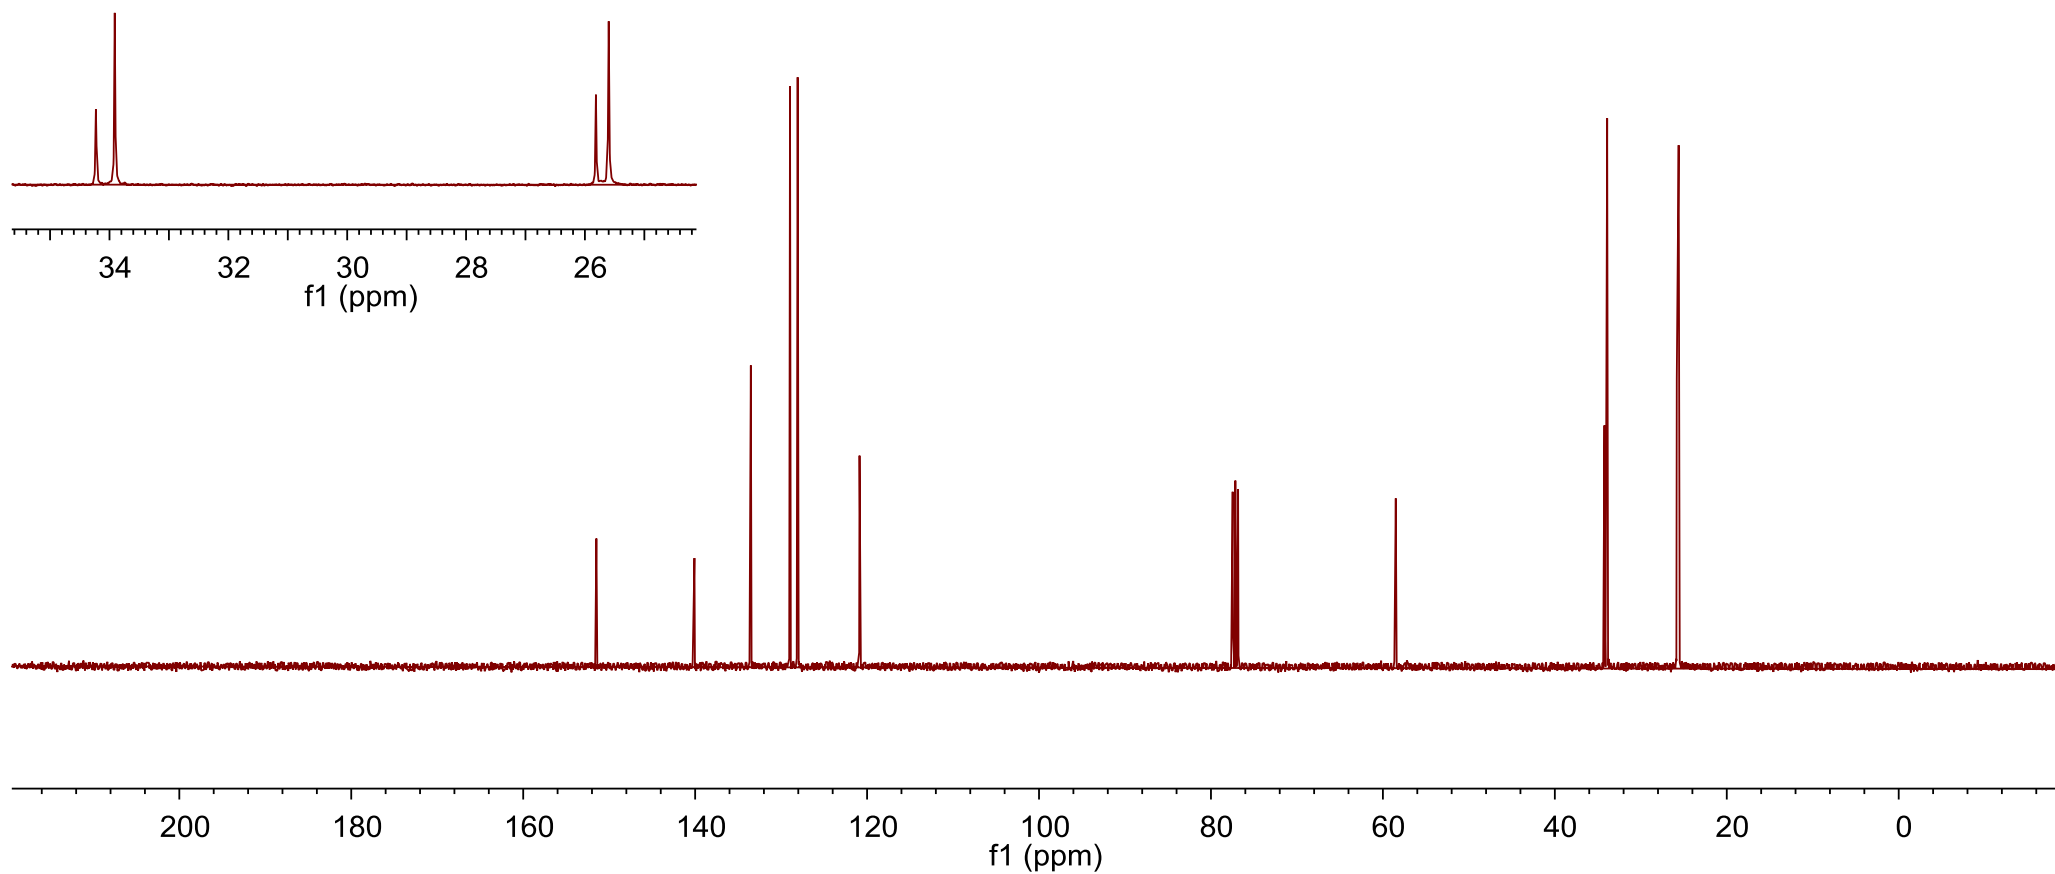

CDCl<sub>3</sub>, 400.13 MHz

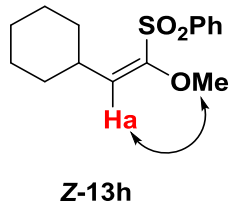

5.11  
5.09

3.55

Ha

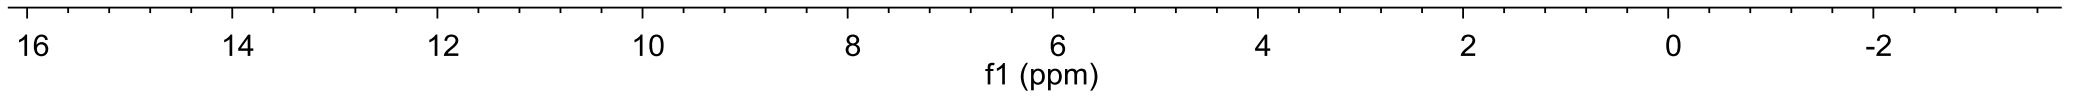

1D-NOE Spectrum of Z-13h

CDCl<sub>3</sub>, 400.13 MHz

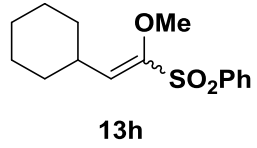

6.32  
6.30

5.11  
5.09

3.81  
3.55

-0.00

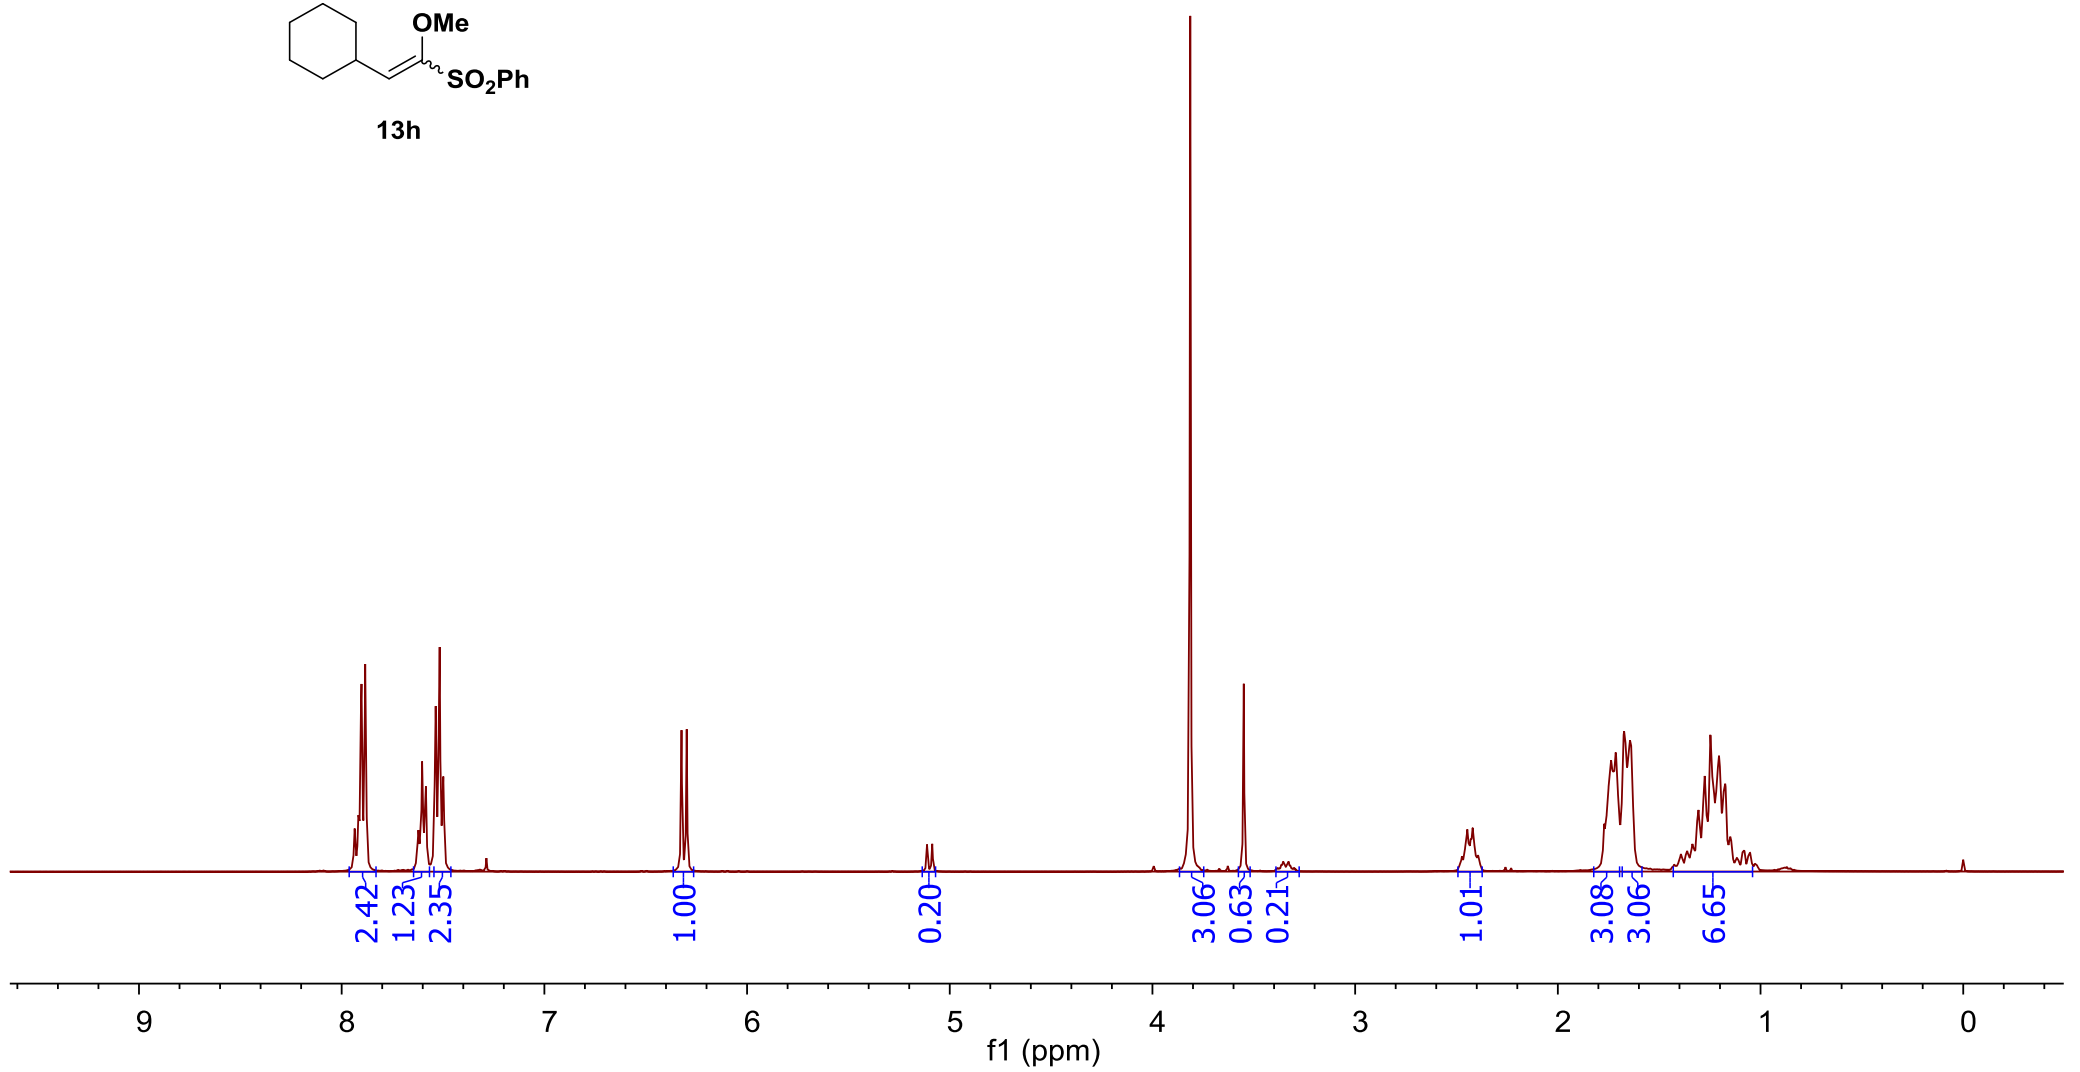

<sup>1</sup>H NMR Spectrum of **13h**

CDCl<sub>3</sub>, 100.61 MHz

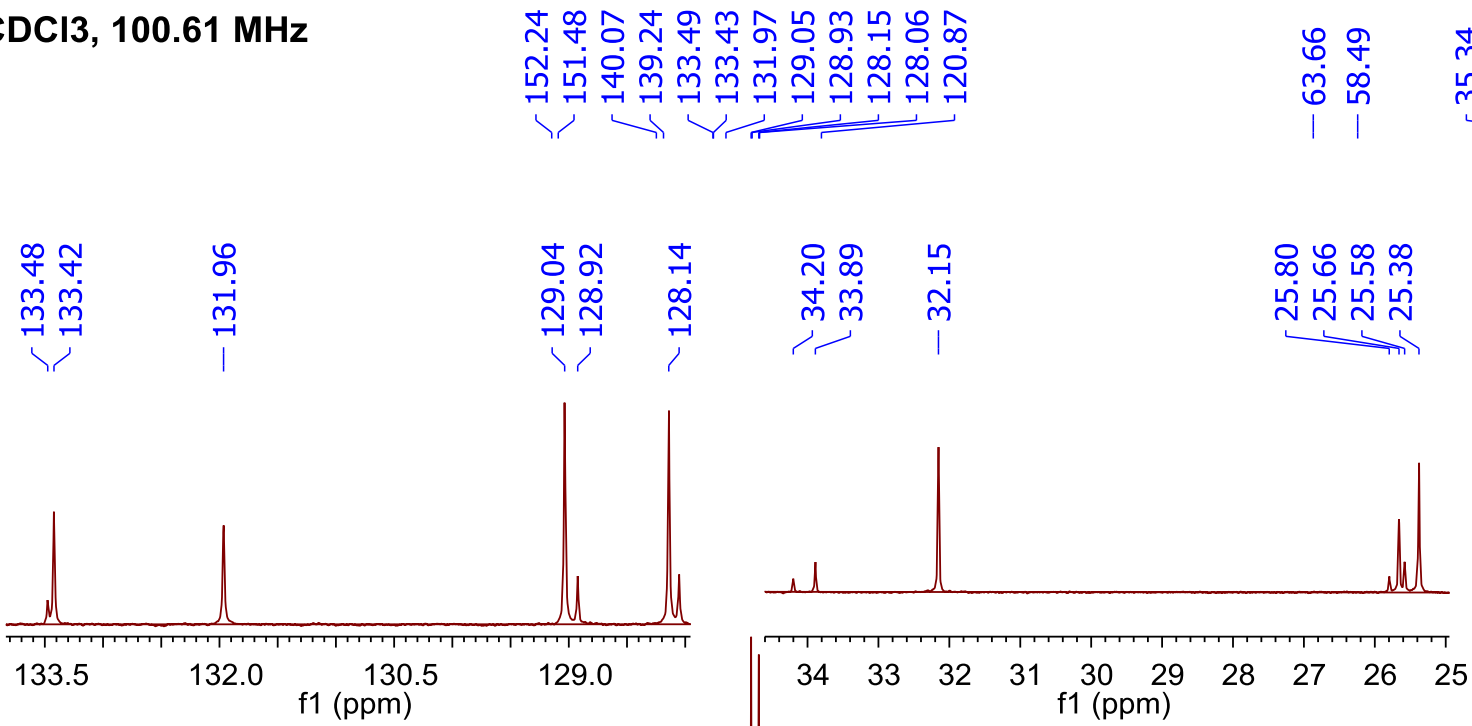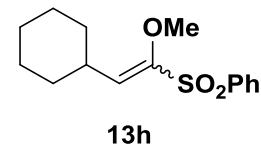

152.24  
151.48  
140.07  
139.24  
133.49  
133.43  
131.97  
129.05  
128.93  
128.15  
128.06  
120.87  
— 63.66  
— 58.49  
35.34  
34.20  
33.89  
32.15  
25.80  
25.66  
25.58  
25.38

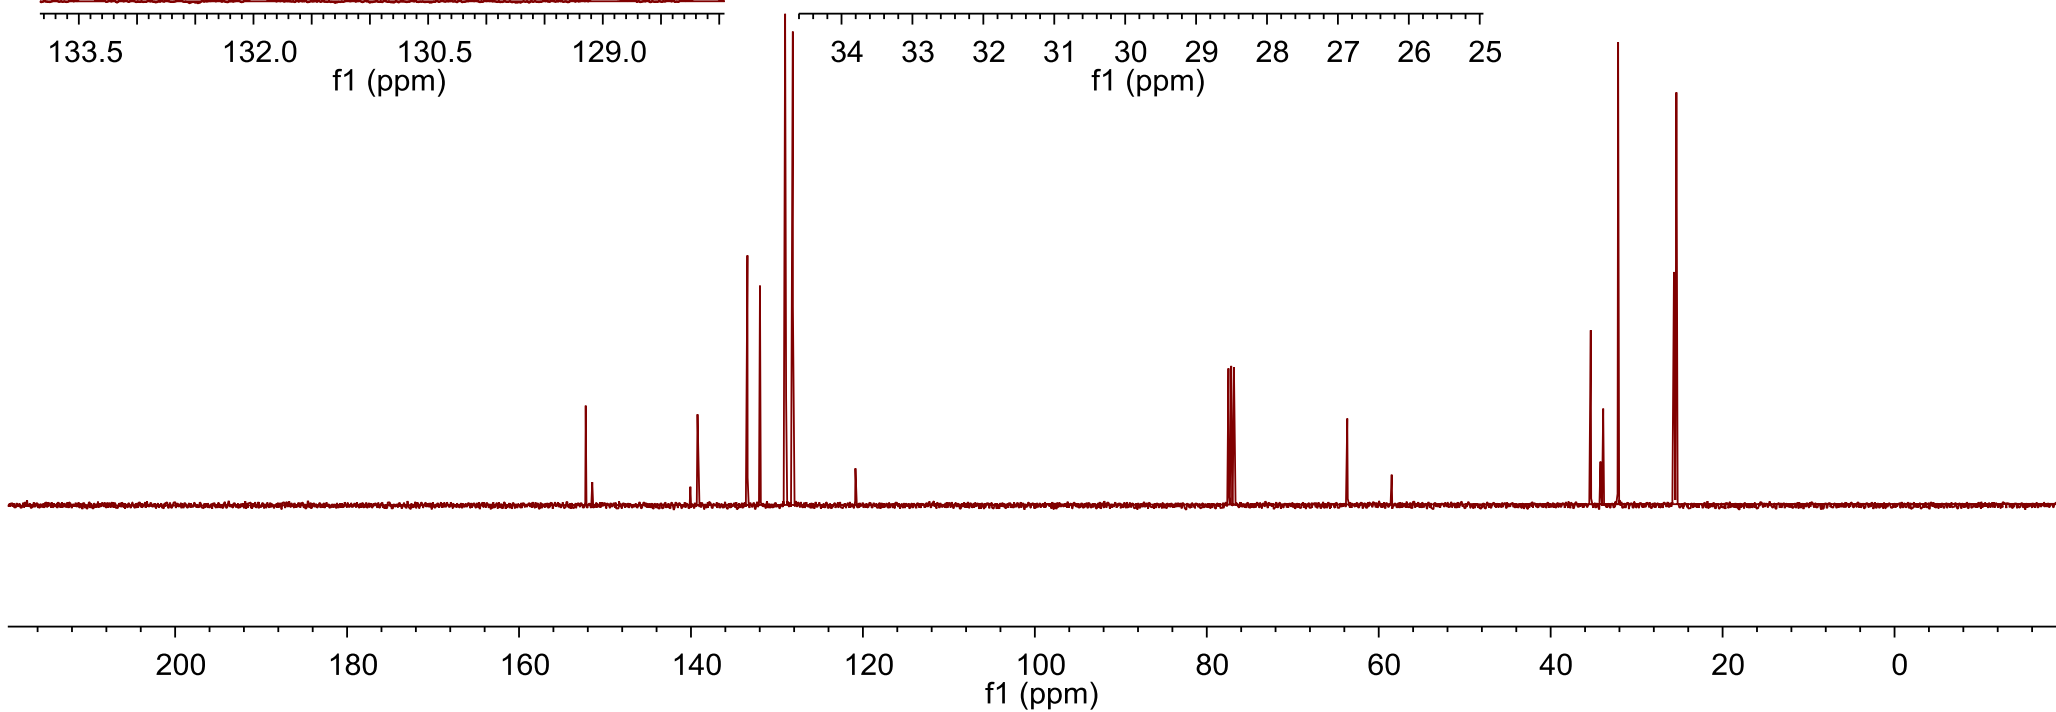

<sup>13</sup>C NMR Spectrum of **13h**

CDCl<sub>3</sub>, 400.13 MHz

6.32  
6.30

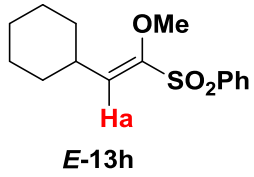

Ha

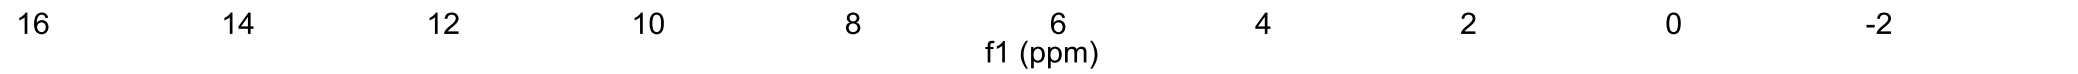

1D-NOE Spectrum of ***E*-13h**

CDCl<sub>3</sub>, 400.13 MHz

6.30  
6.27

3.85

-0.00

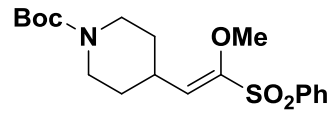

*E*-13i

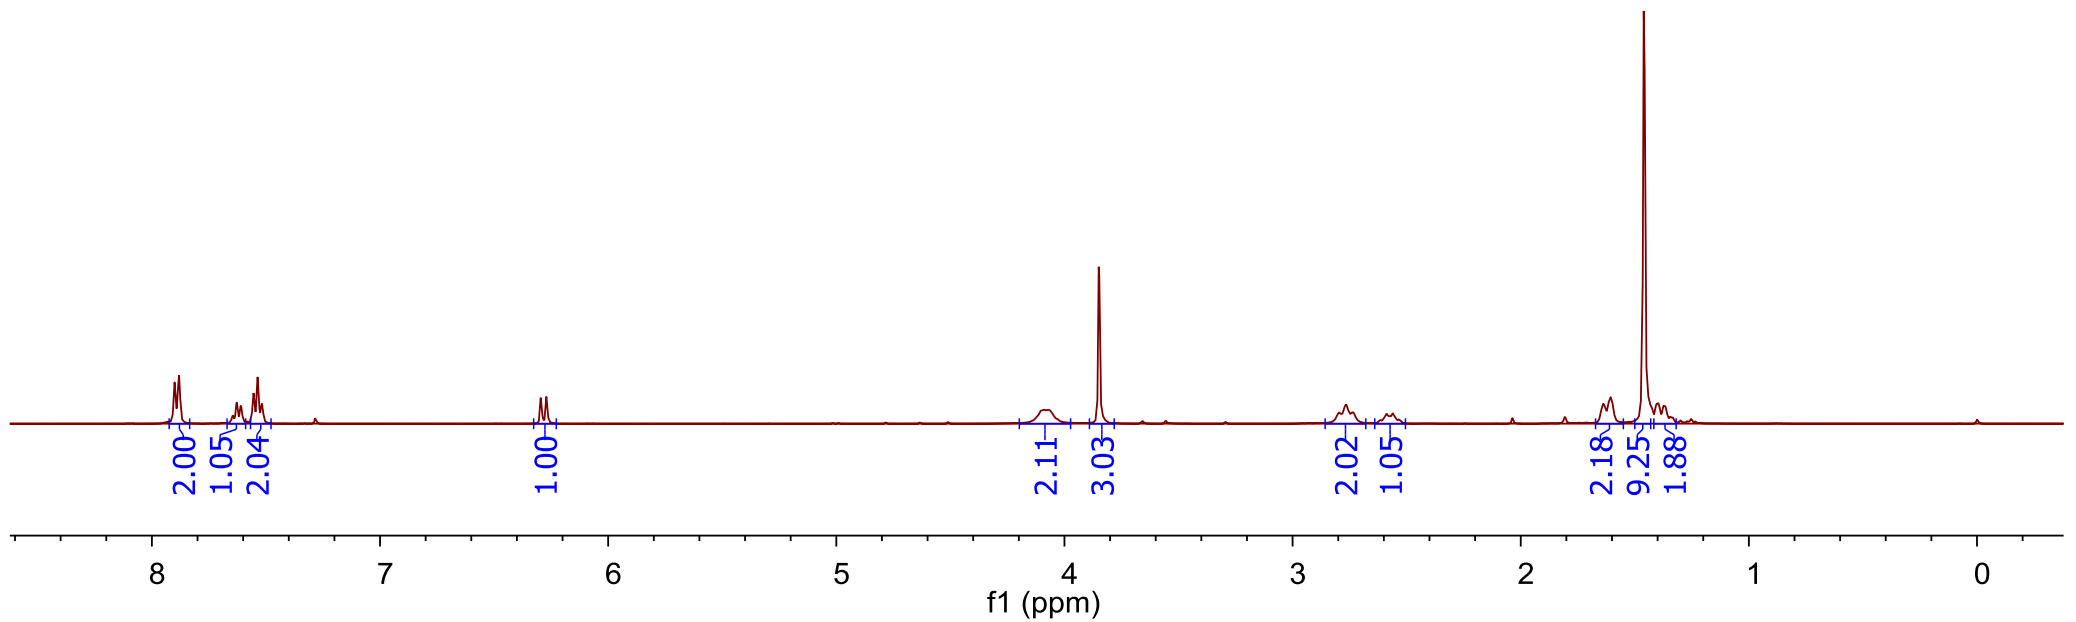

<sup>1</sup>H NMR Spectrum of *E*-13i

CDCl<sub>3</sub>, 100.61 MHz

154.76  
153.39  
138.99  
133.67  
129.73  
129.19  
128.27

79.71

63.74

43.18

33.65

31.05

28.50

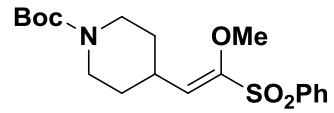

*E*-13i

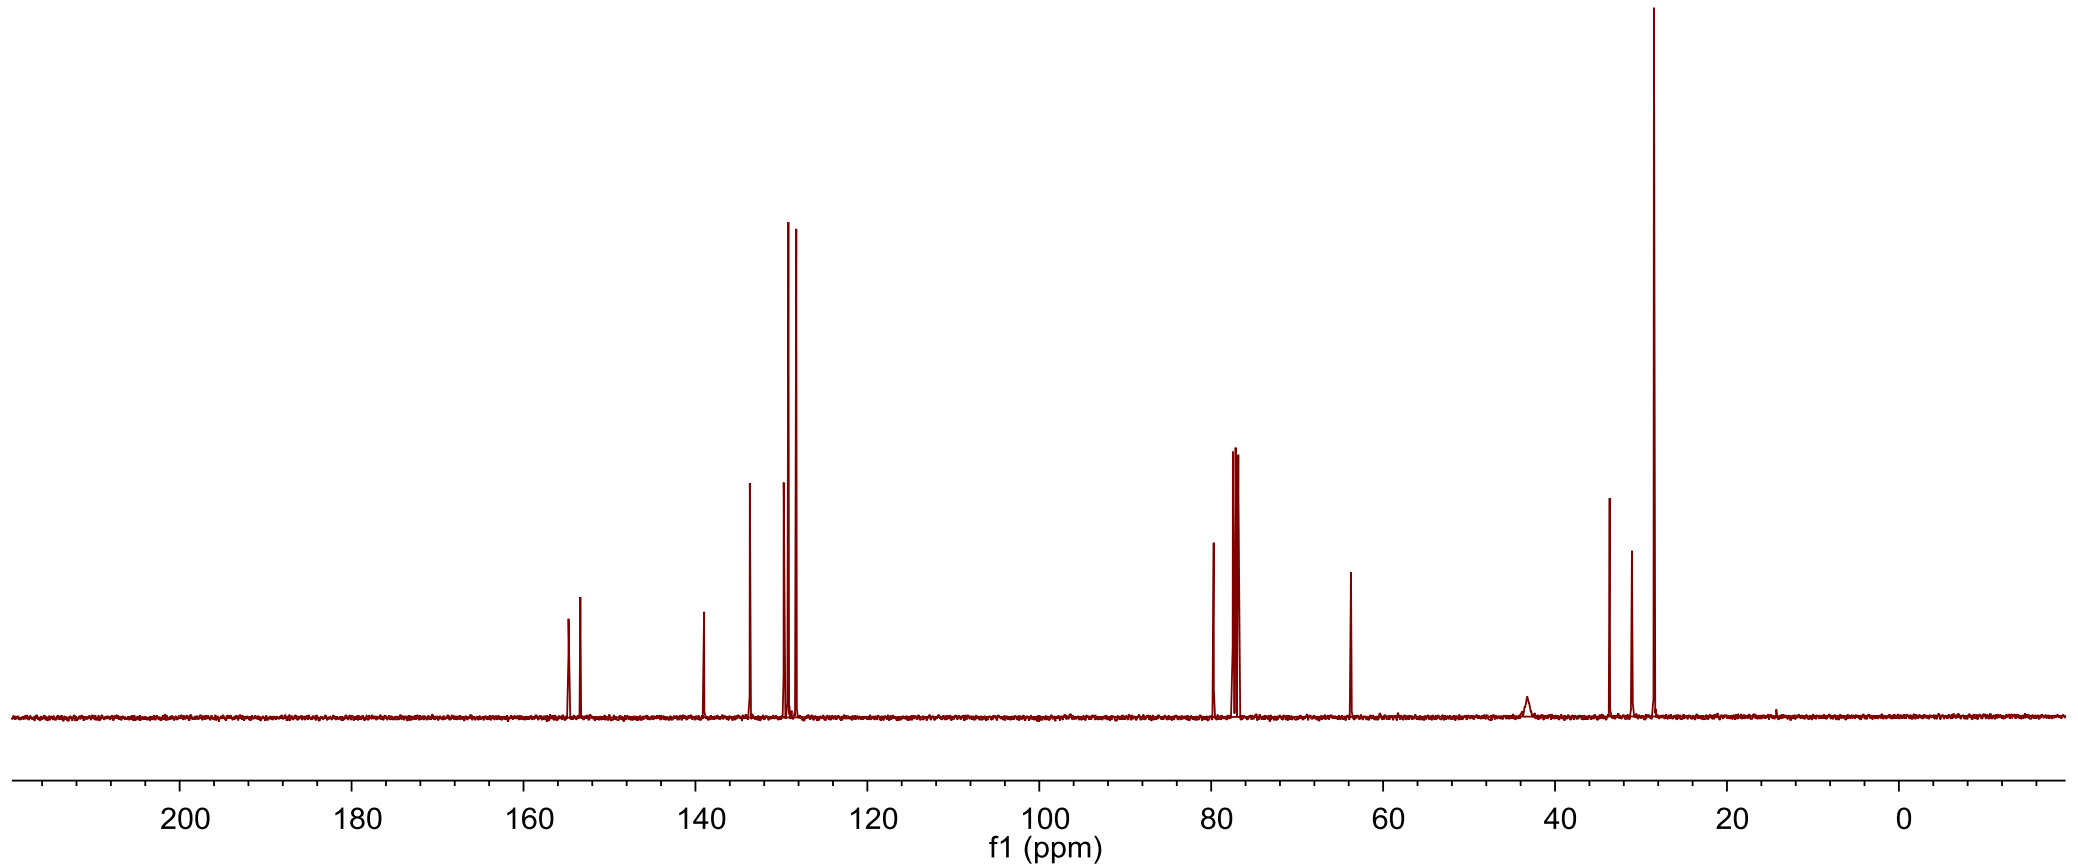

<sup>13</sup>C NMR Spectrum of *E*-13i

CDCl<sub>3</sub>, 400.13 MHz

6.30  
6.27

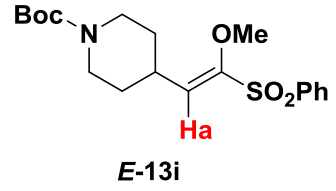

Ha

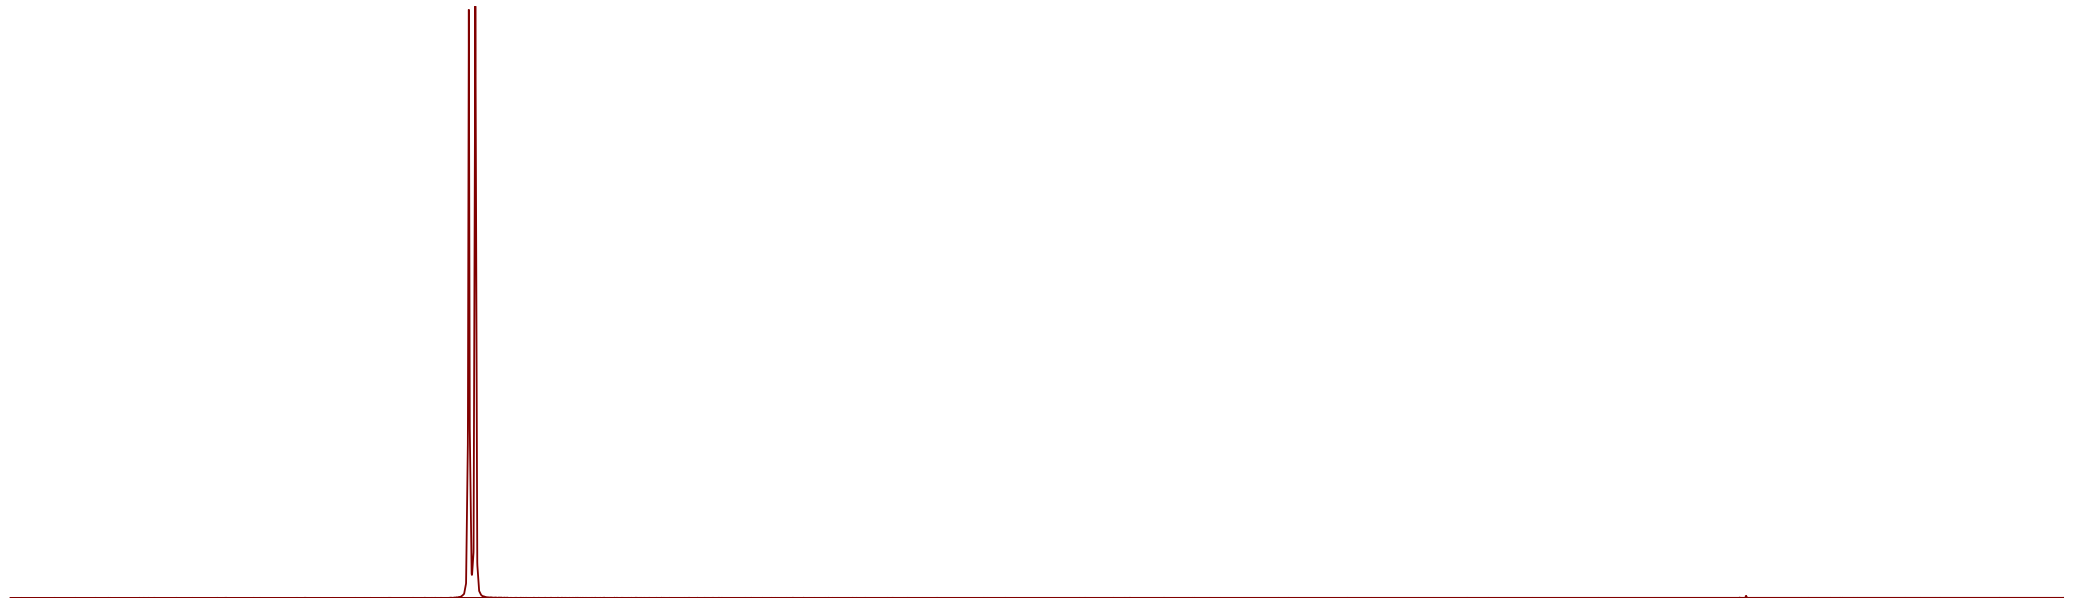

8

7

6

5

4

3

2

1

f1 (ppm)

1D-NOE Spectrum of *E*-13i



CDCl<sub>3</sub>, 400.13 MHz

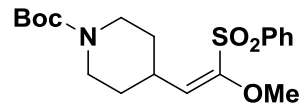

Z-13i

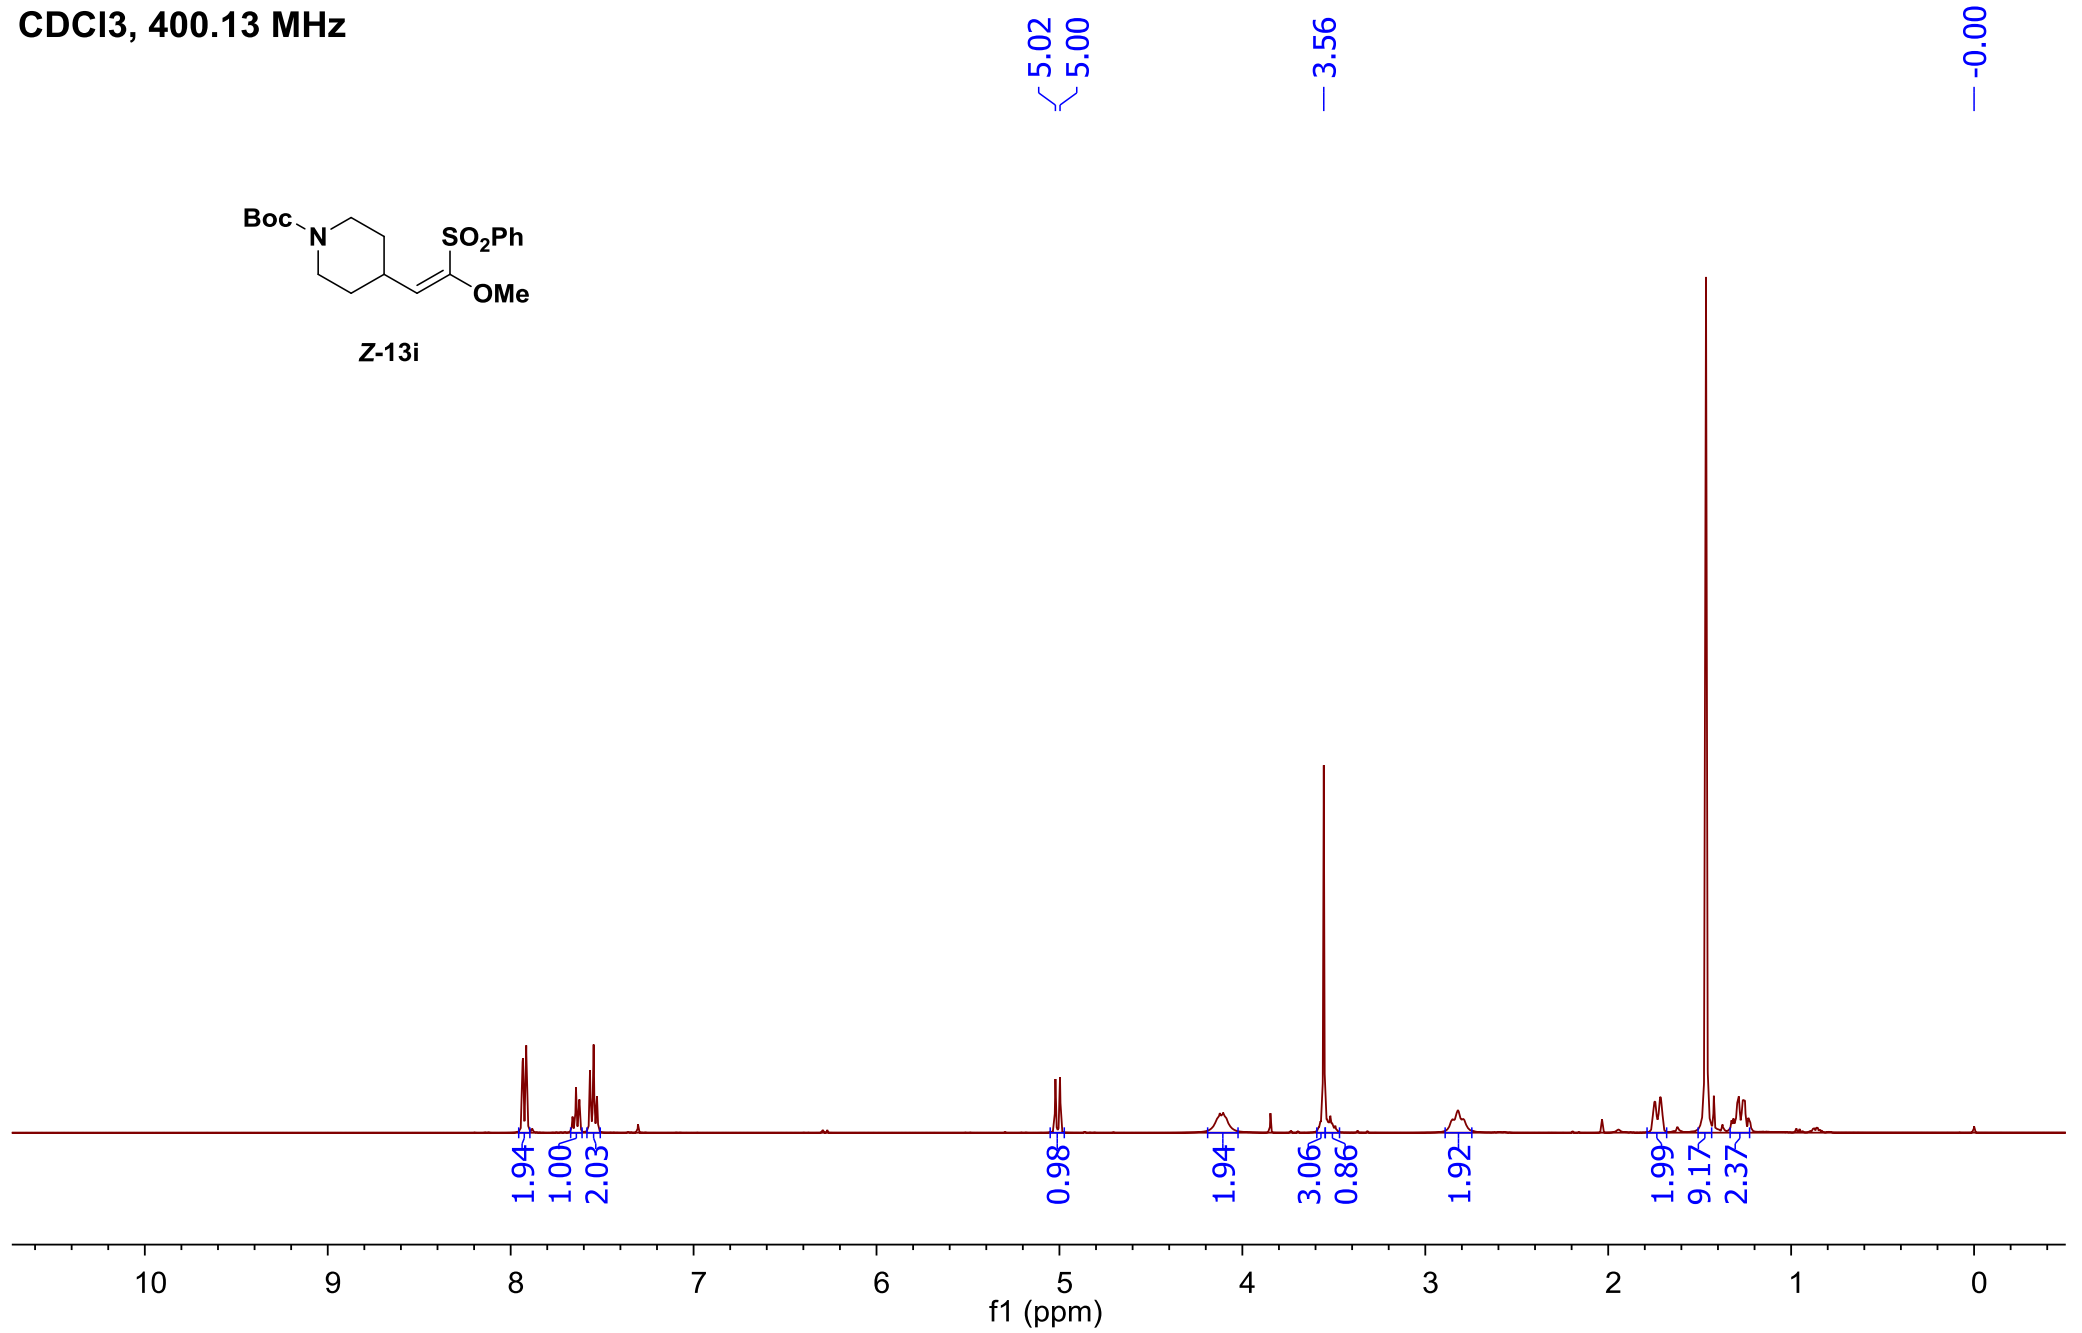

<sup>1</sup>H NMR Spectrum of Z-13i

CDCl<sub>3</sub>, 100.61 MHz

154.77  
152.52  
139.56  
133.73  
129.04  
128.17  
117.50

79.42

58.21

43.29

32.78  
32.58  
28.47

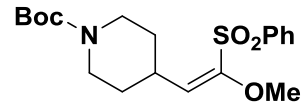

Z-13i

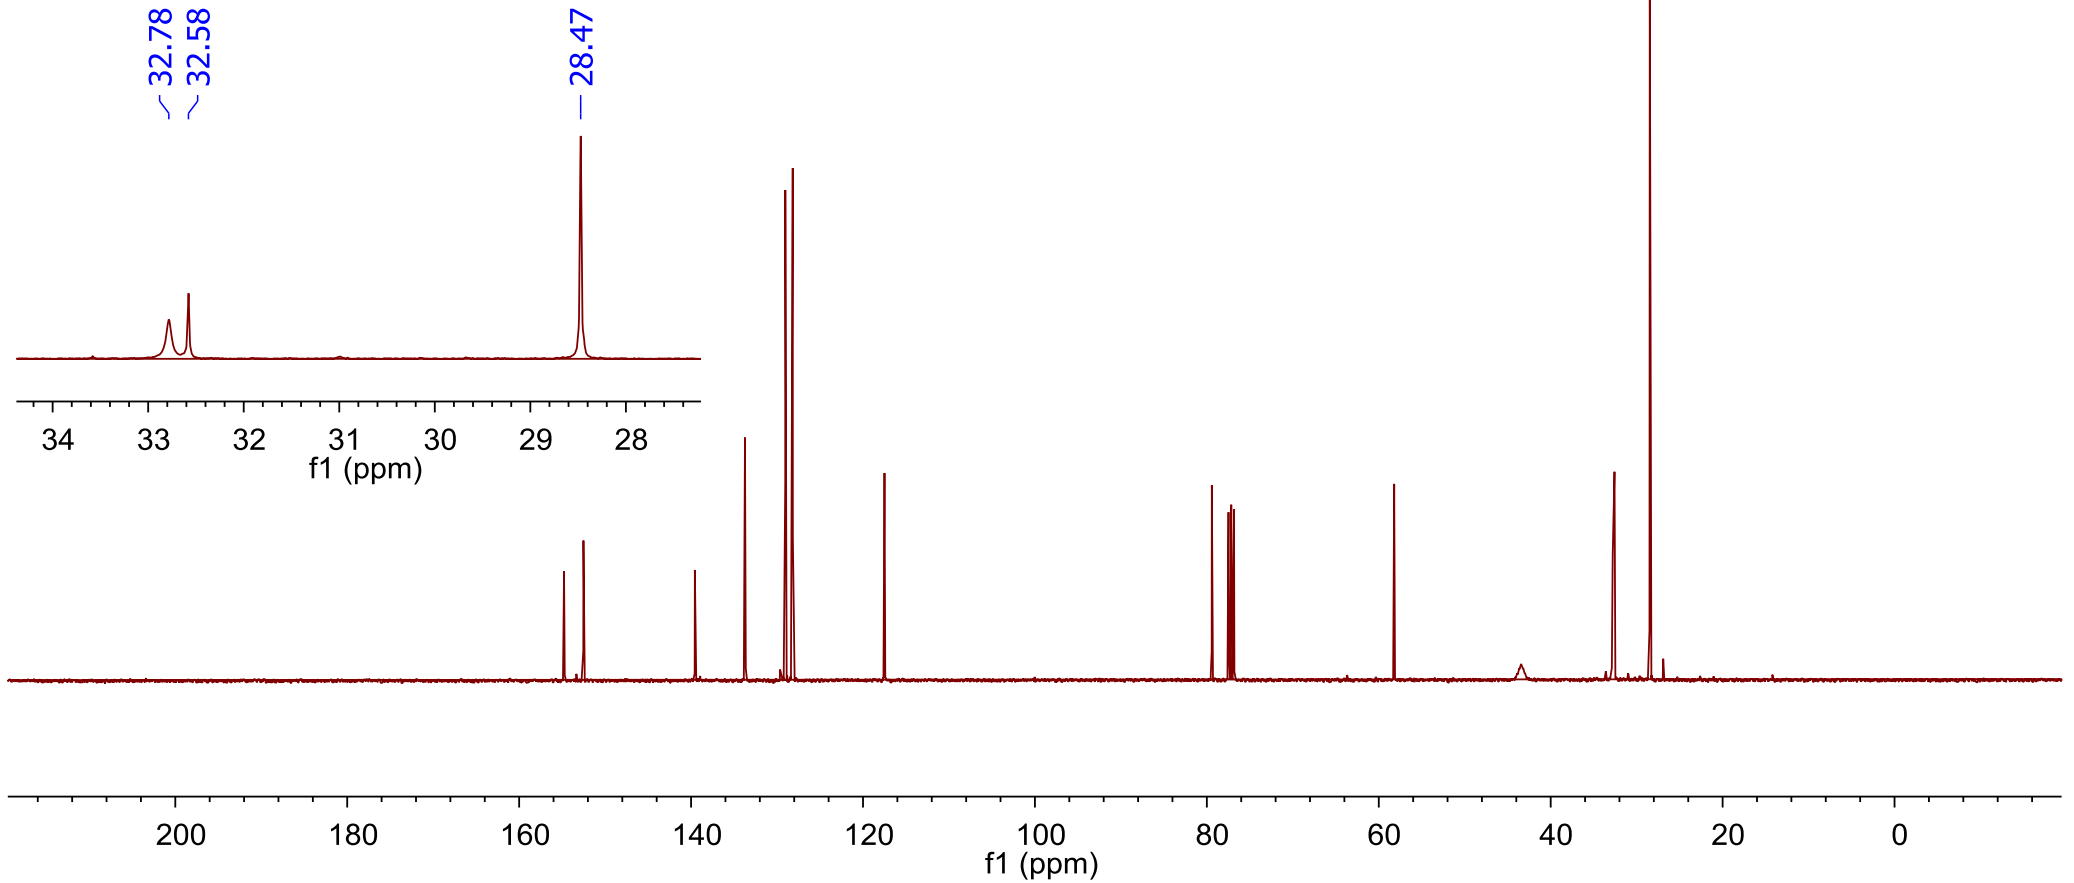

<sup>13</sup>C NMR Spectrum of Z-13i

CDCl<sub>3</sub>, 400.13 MHz

5.01  
4.99

3.56

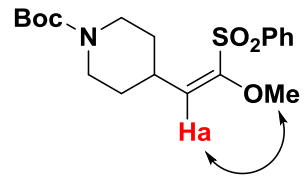

Z-13i

Ha

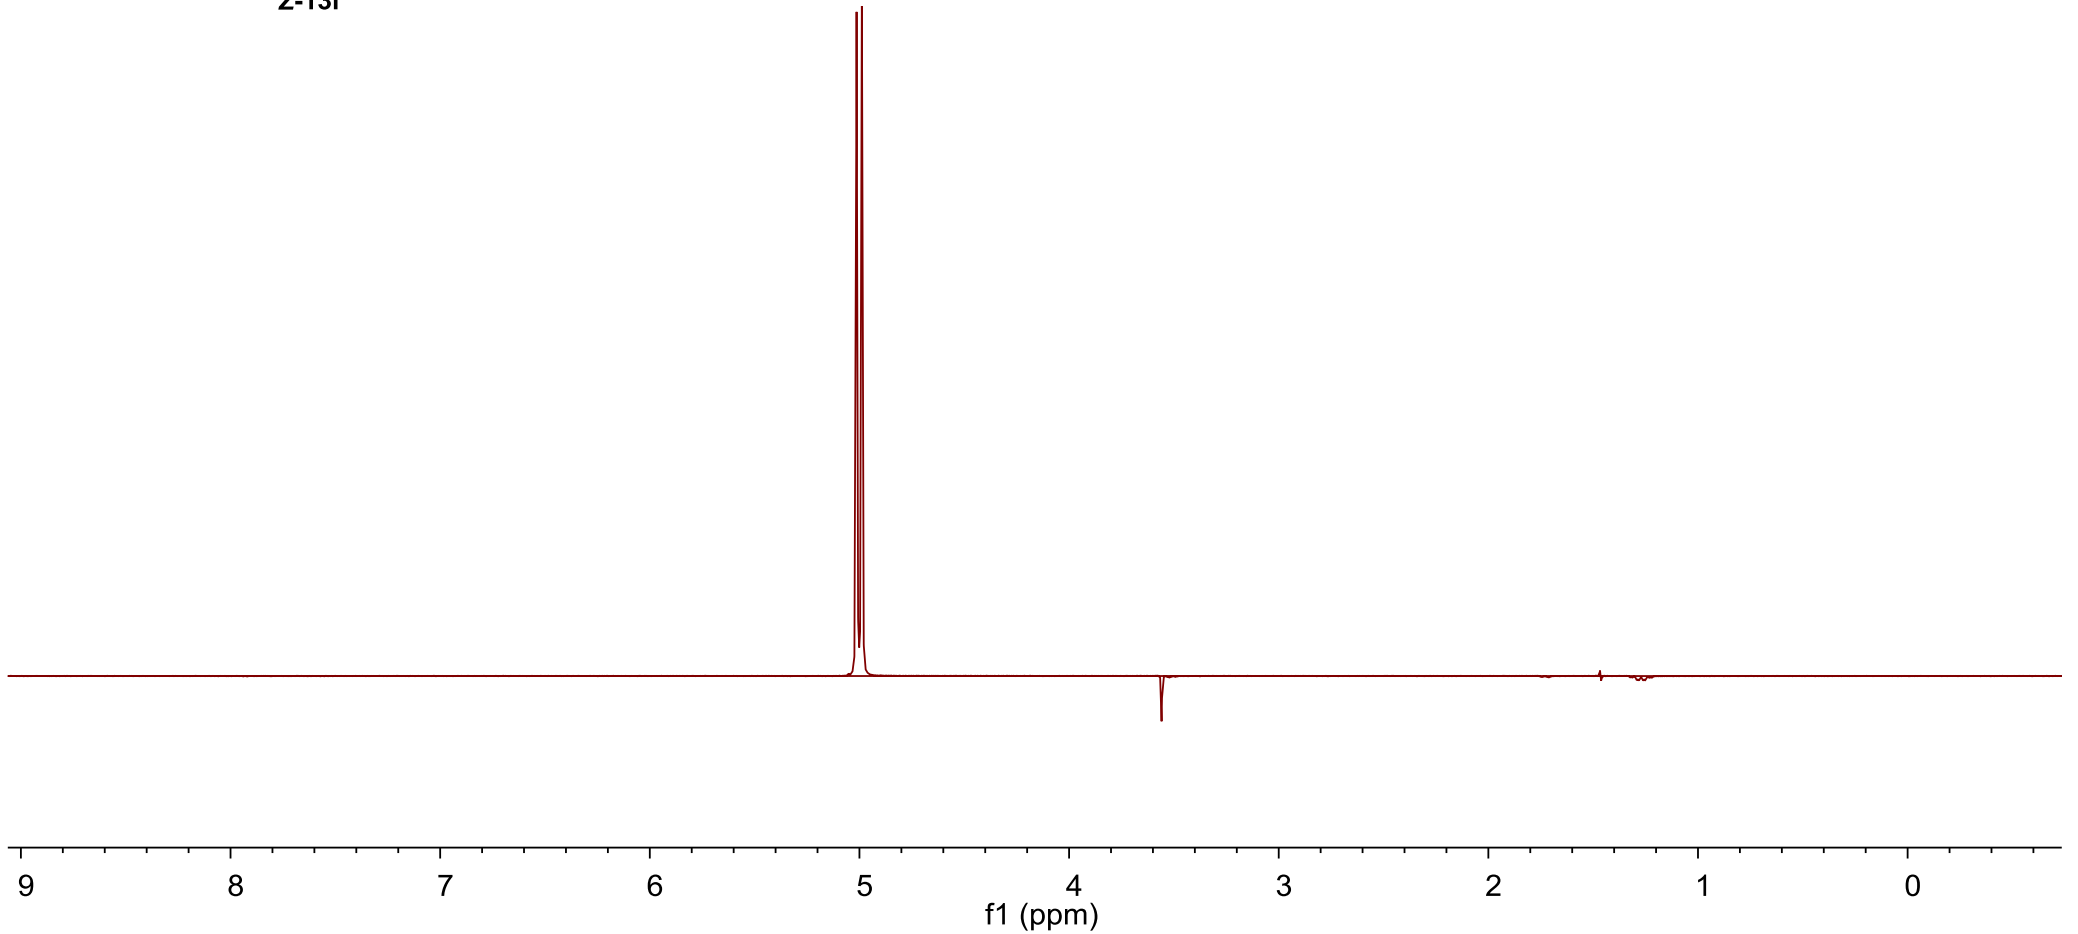

1D-NOE Spectrum of Z-13i

CDCl<sub>3</sub>, 400.13 MHz

6.42  
6.40  
6.38

5.36  
5.34  
5.32  
4.99  
4.75

-0.00

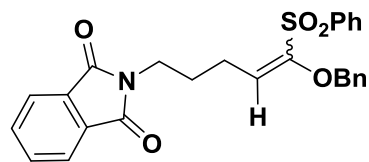

13j

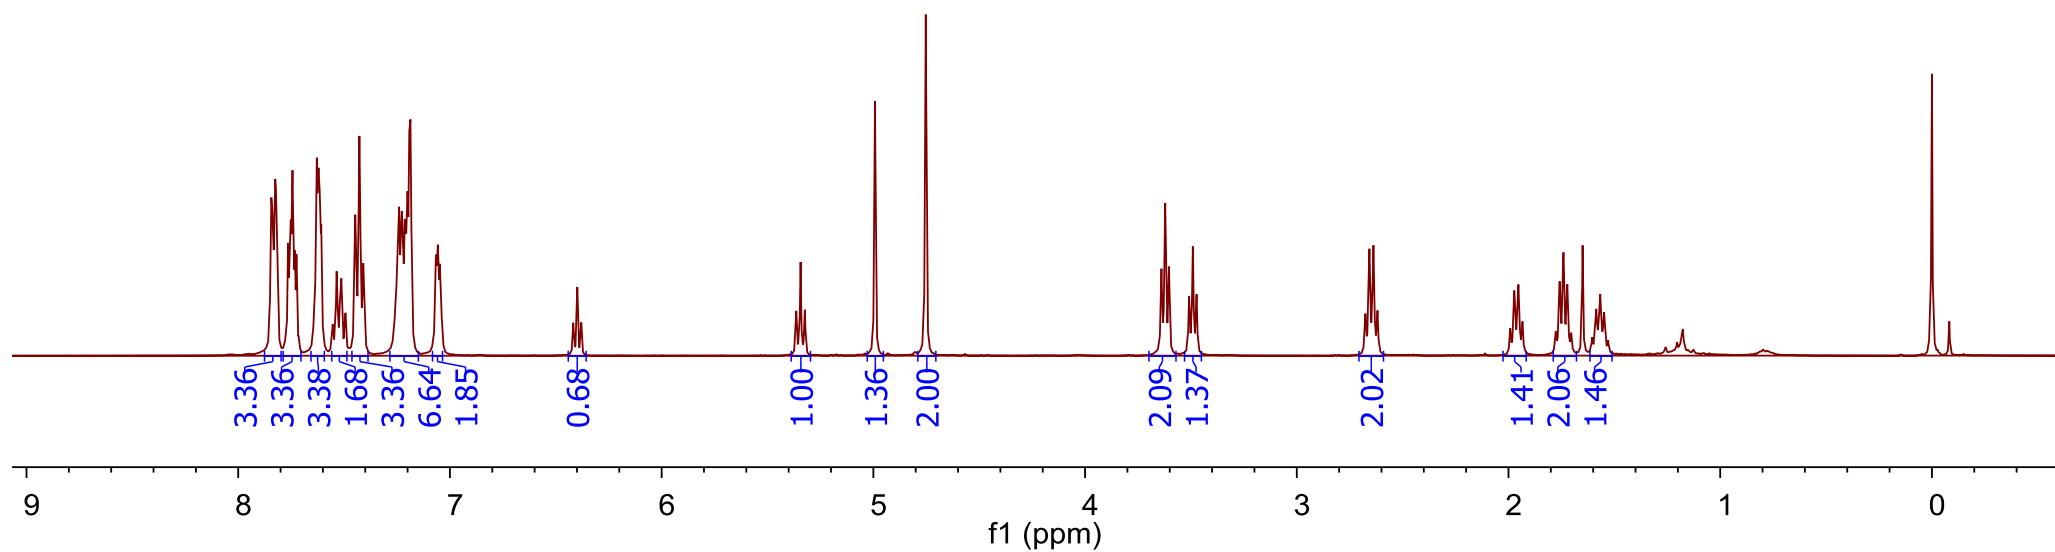

<sup>1</sup>H NMR Spectrum of 13j

CDCl<sub>3</sub>, 100.61 MHz

168.43  
168.25

152.32  
151.85

134.09  
134.03  
133.68

132.21  
129.18  
129.08

129.05  
128.76  
128.63

128.53  
128.47  
128.36

127.84  
123.33  
123.29

77.25  
74.06

37.43  
37.25

28.95  
27.41

23.39  
22.70

129.18  
129.08  
129.05

128.76  
128.63  
128.53  
128.47  
128.36

127.84

77.25

74.06

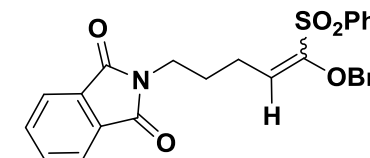

13j

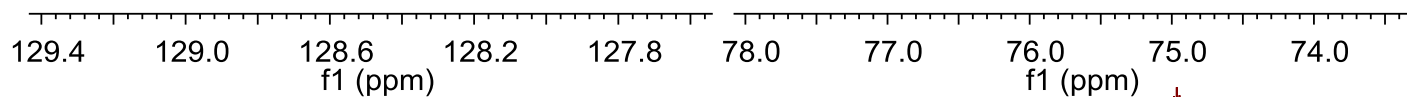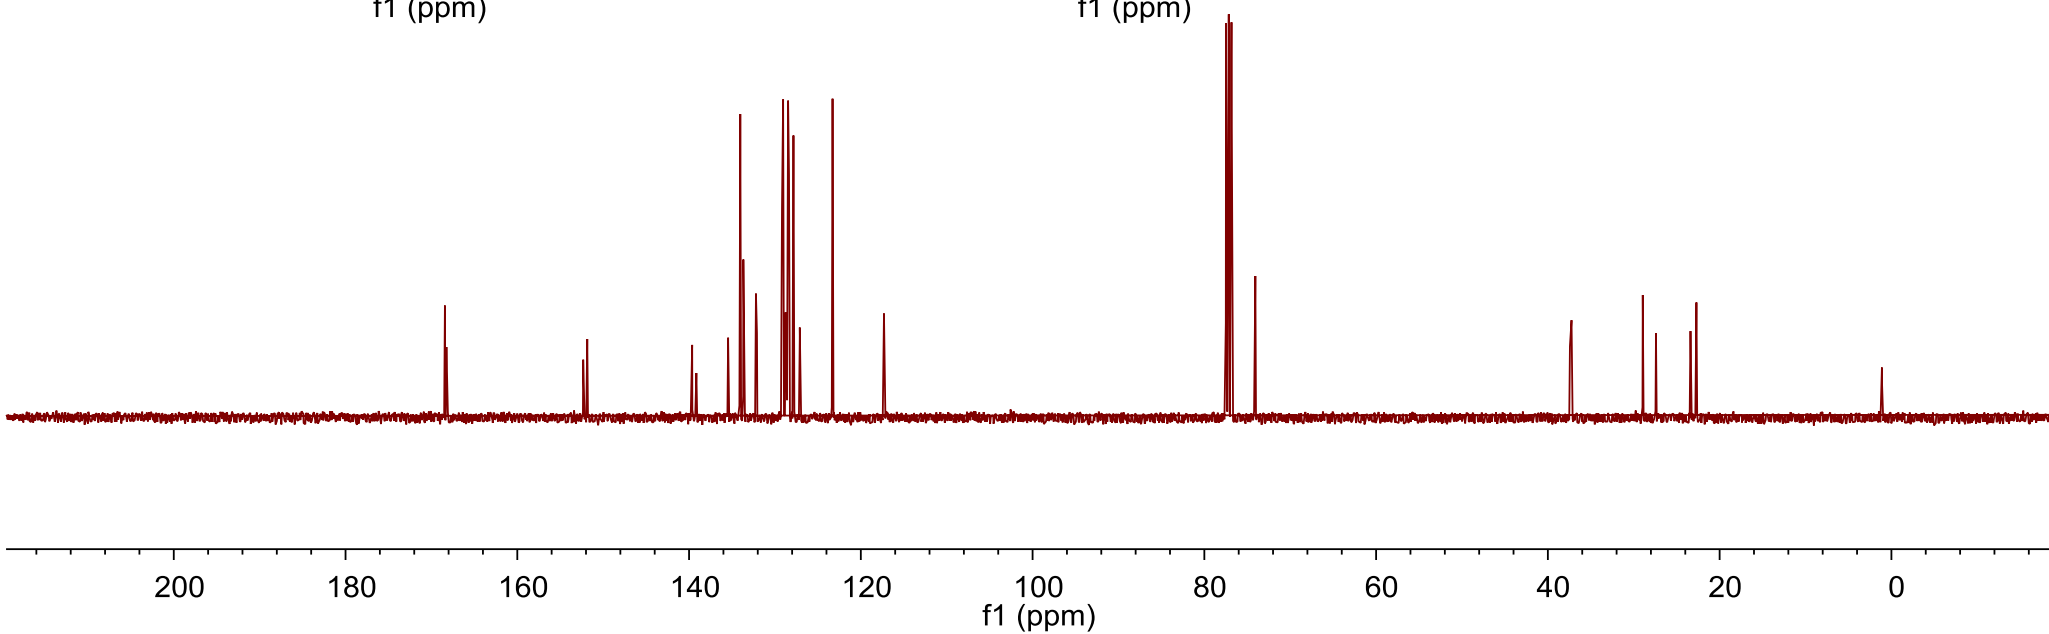

<sup>13</sup>C NMR Spectrum of 13j

CDCl<sub>3</sub>, 400.13 MHz

6.42  
6.40  
6.38

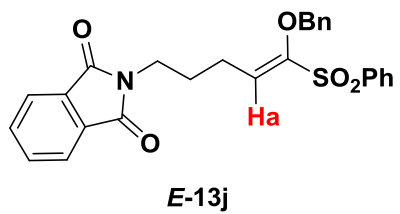

Ha

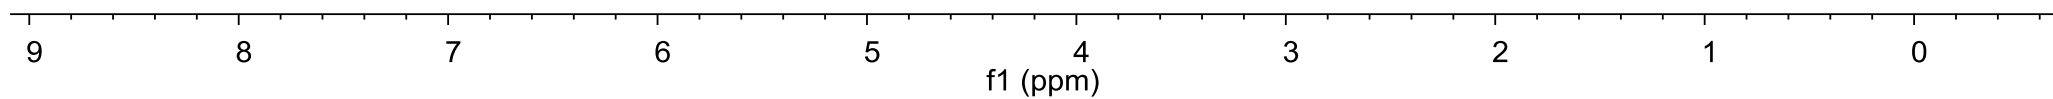

1D-NOE Spectrum of *E*-13j

CDCl<sub>3</sub>, 400.13 MHz

5.36  
5.34  
5.32

4.75

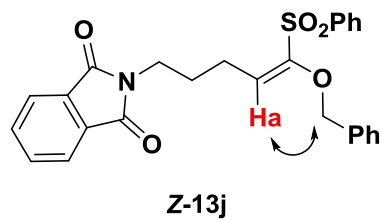

Ha

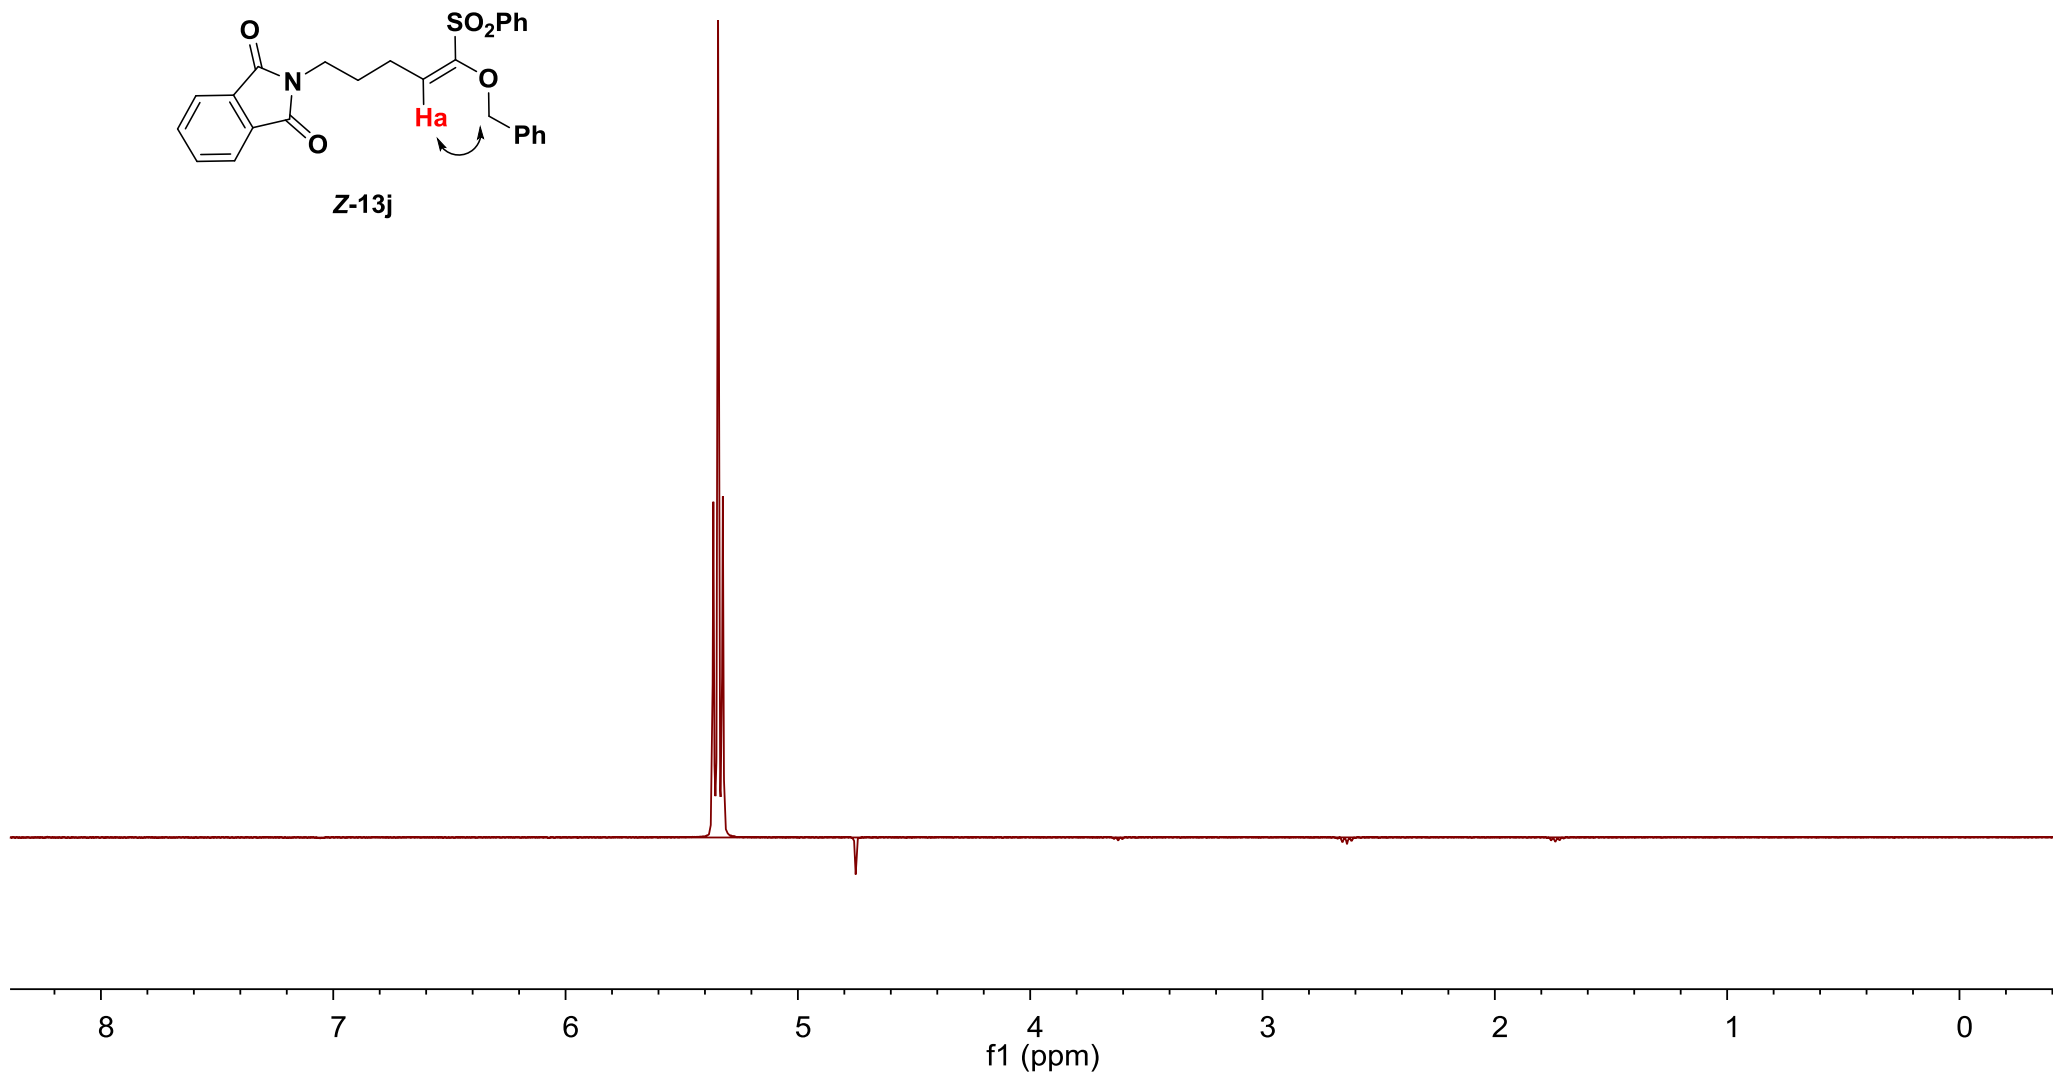

1D-NOE Spectrum of **Z-13j**





CDCl<sub>3</sub>, 100.61 MHz

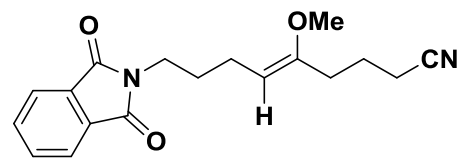

12a

— 168.55

— 153.46

— 134.00

— 132.35

— 123.30

— 119.68

— 110.96

— 56.71

— 37.84

— 30.02

— 28.74

— 22.92

— 22.30

— 16.34

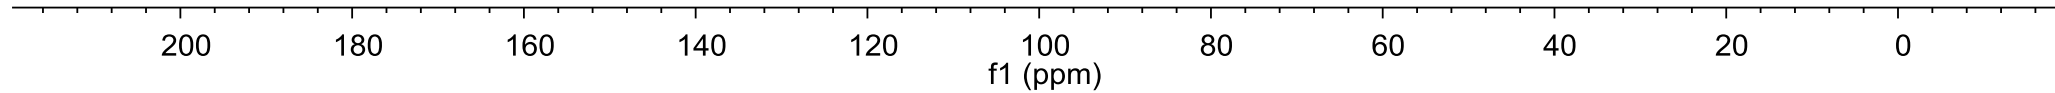

<sup>13</sup>C NMR Spectrum of 12a

CDCl<sub>3</sub>, 400.13 MHz

4.67  
4.65  
4.64

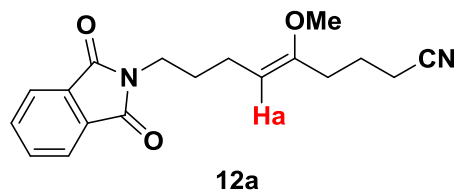

Ha

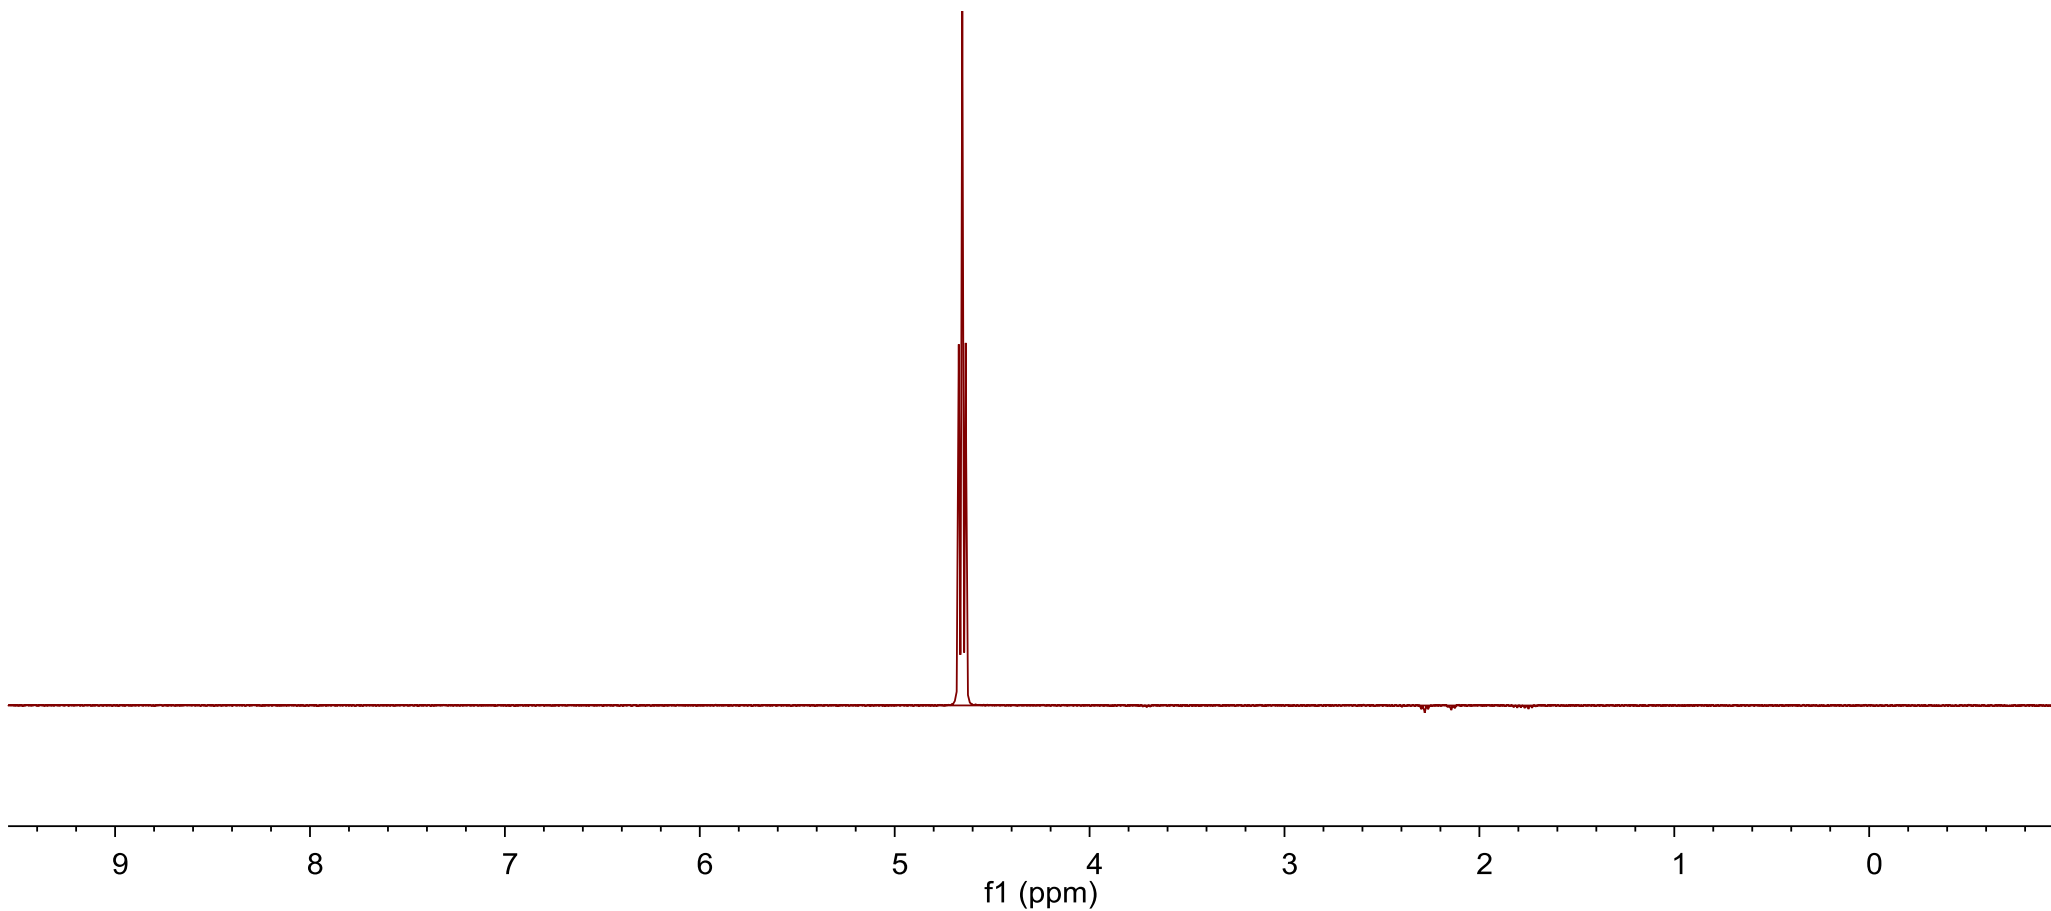

1D-NOE Spectrum of **12a**

CDCl<sub>3</sub>, 400.13 MHz

4.53  
4.51  
4.49

3.50

-0.00

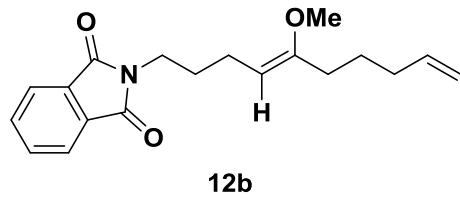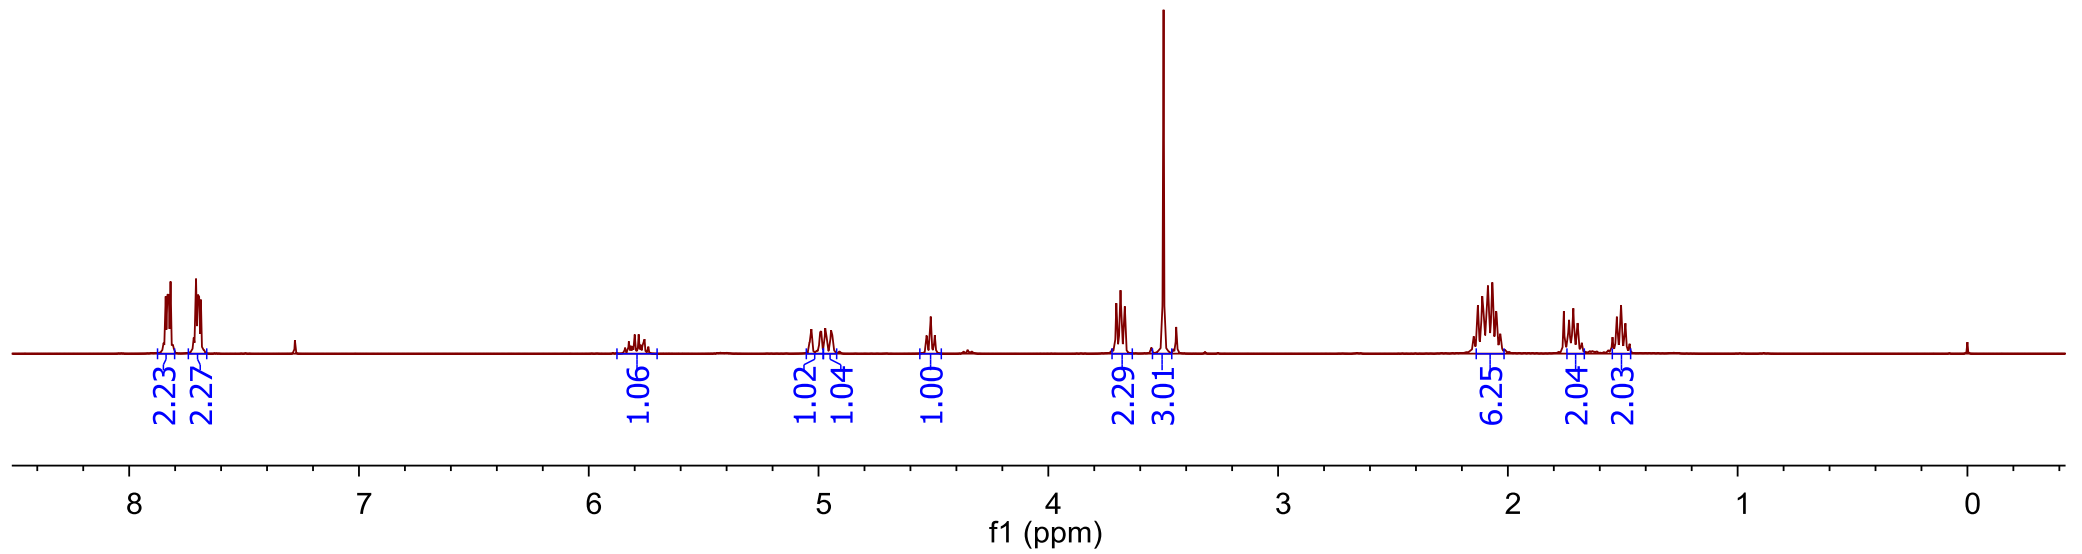

<sup>1</sup>H NMR Spectrum of **12b**

CDCl<sub>3</sub>, 100.61 MHz

— 168.49

— 155.59

∩ 138.58

∩ 133.88

∩ 132.36

∩ 123.24

∩ 123.20

∩ 114.87

∩ 108.34

— 56.25

∩ 37.95

∩ 33.20

∩ 30.56

∩ 28.80

∩ 26.41

∩ 22.26

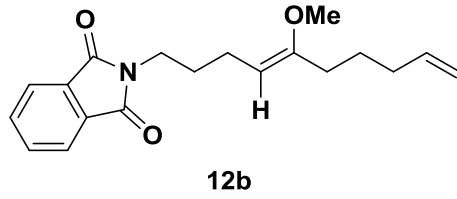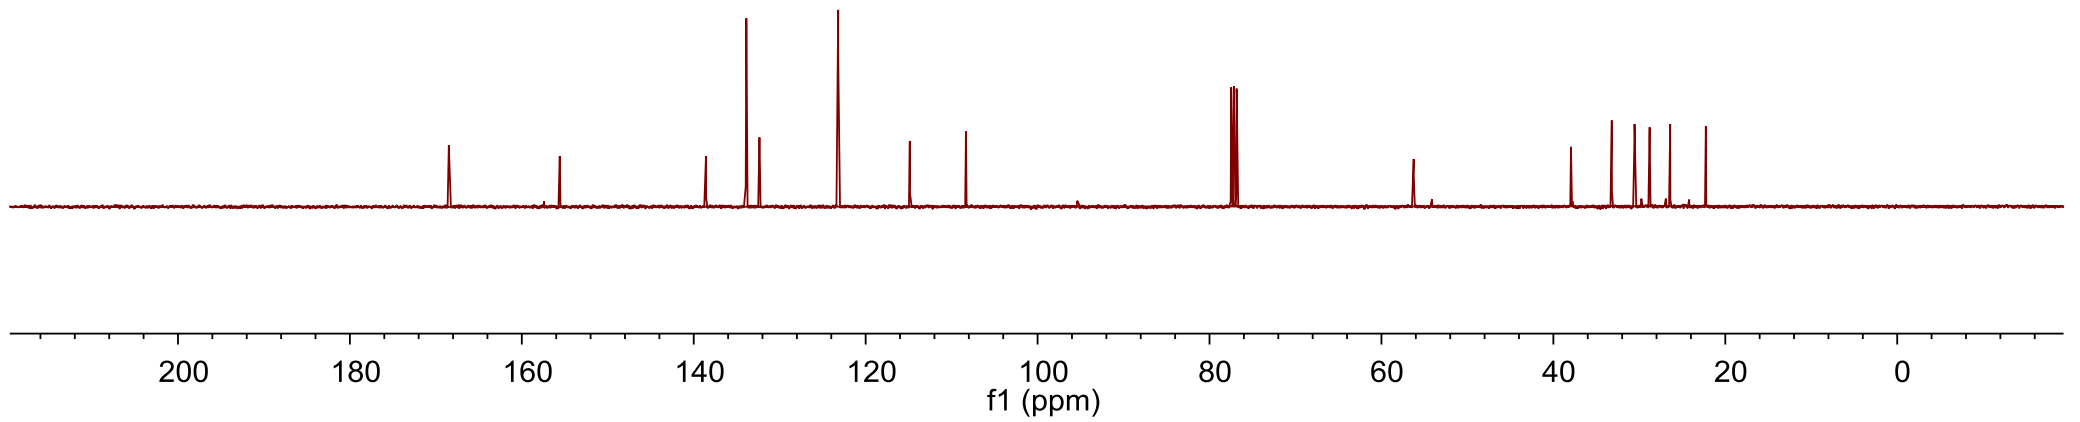

<sup>13</sup>C NMR Spectrum of **12b**

CDCl<sub>3</sub>, 400.13 MHz

4.53  
4.51  
4.49

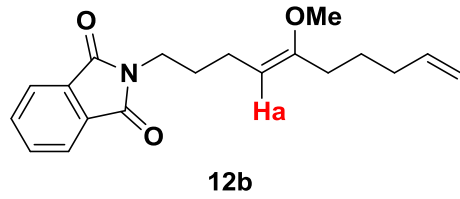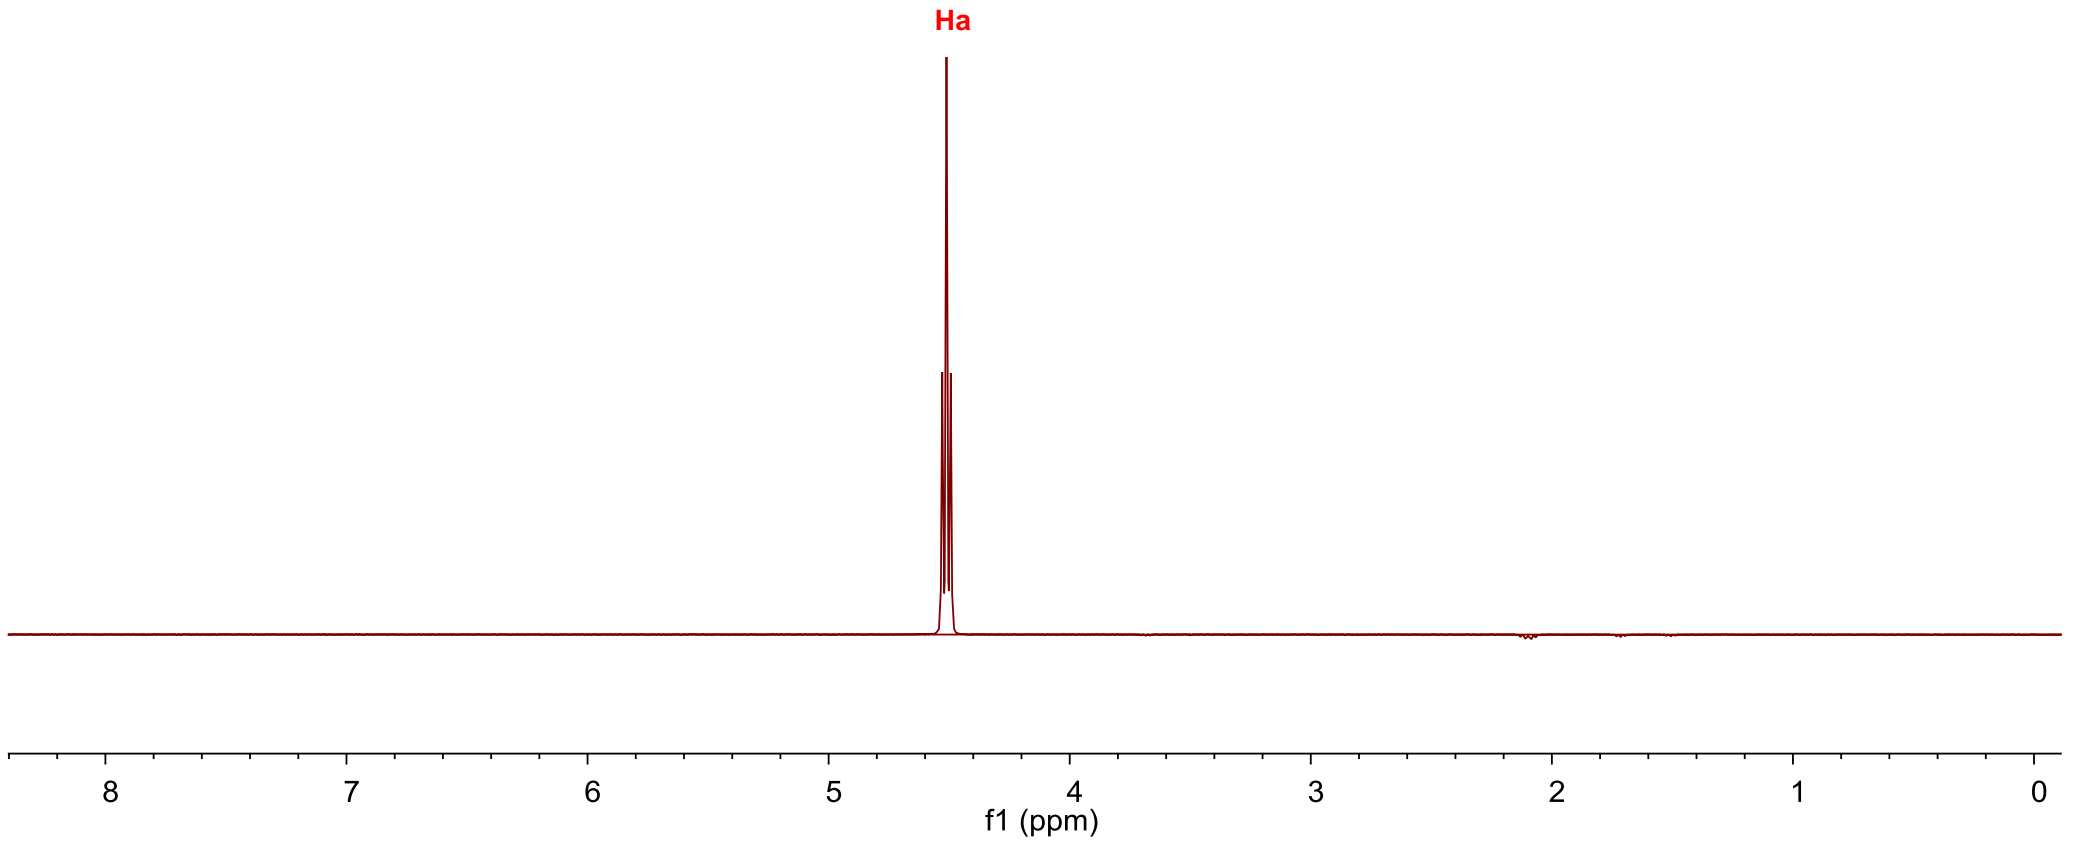

1D-NOE Spectrum of **12b**

CDCl<sub>3</sub>, 400.13 MHz

4.55  
4.53  
4.52

3.51

-0.00

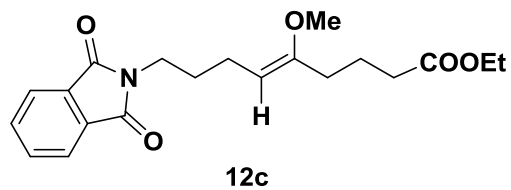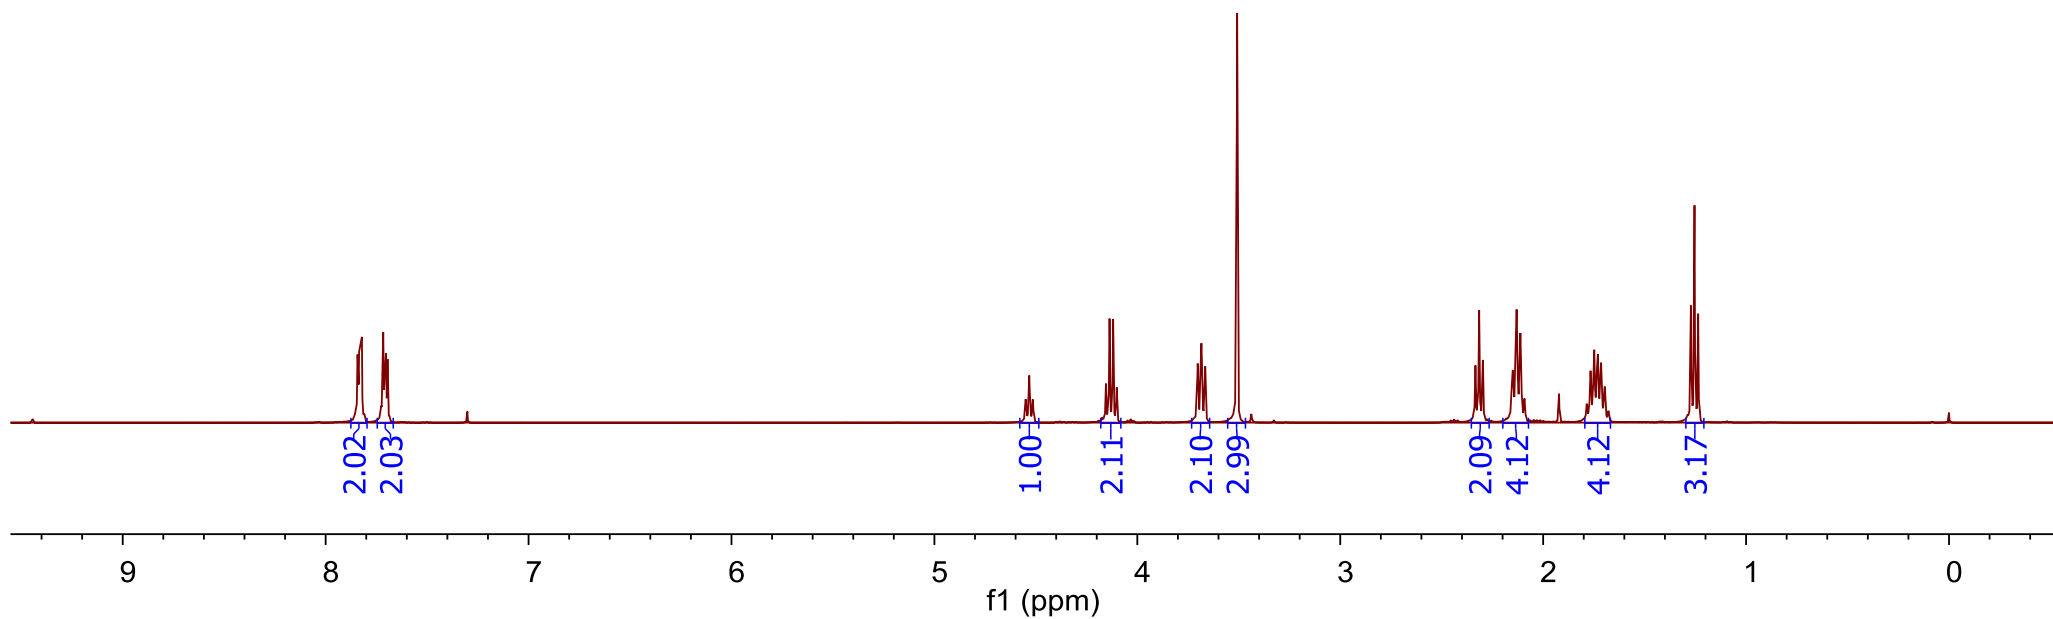

<sup>1</sup>H NMR Spectrum of **12c**

CDCl<sub>3</sub>, 100.61 MHz

— 173.50

— 168.42

— 154.75

— 133.85

— 132.29

— 123.15

— 109.03

— 60.27

— 56.26

— 37.86

— 33.42

— 30.47

— 28.73

— 22.43

— 22.21

— 14.31

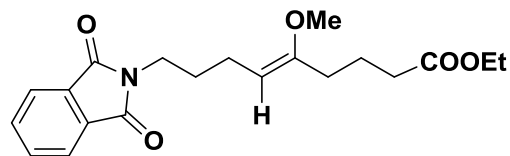

12c

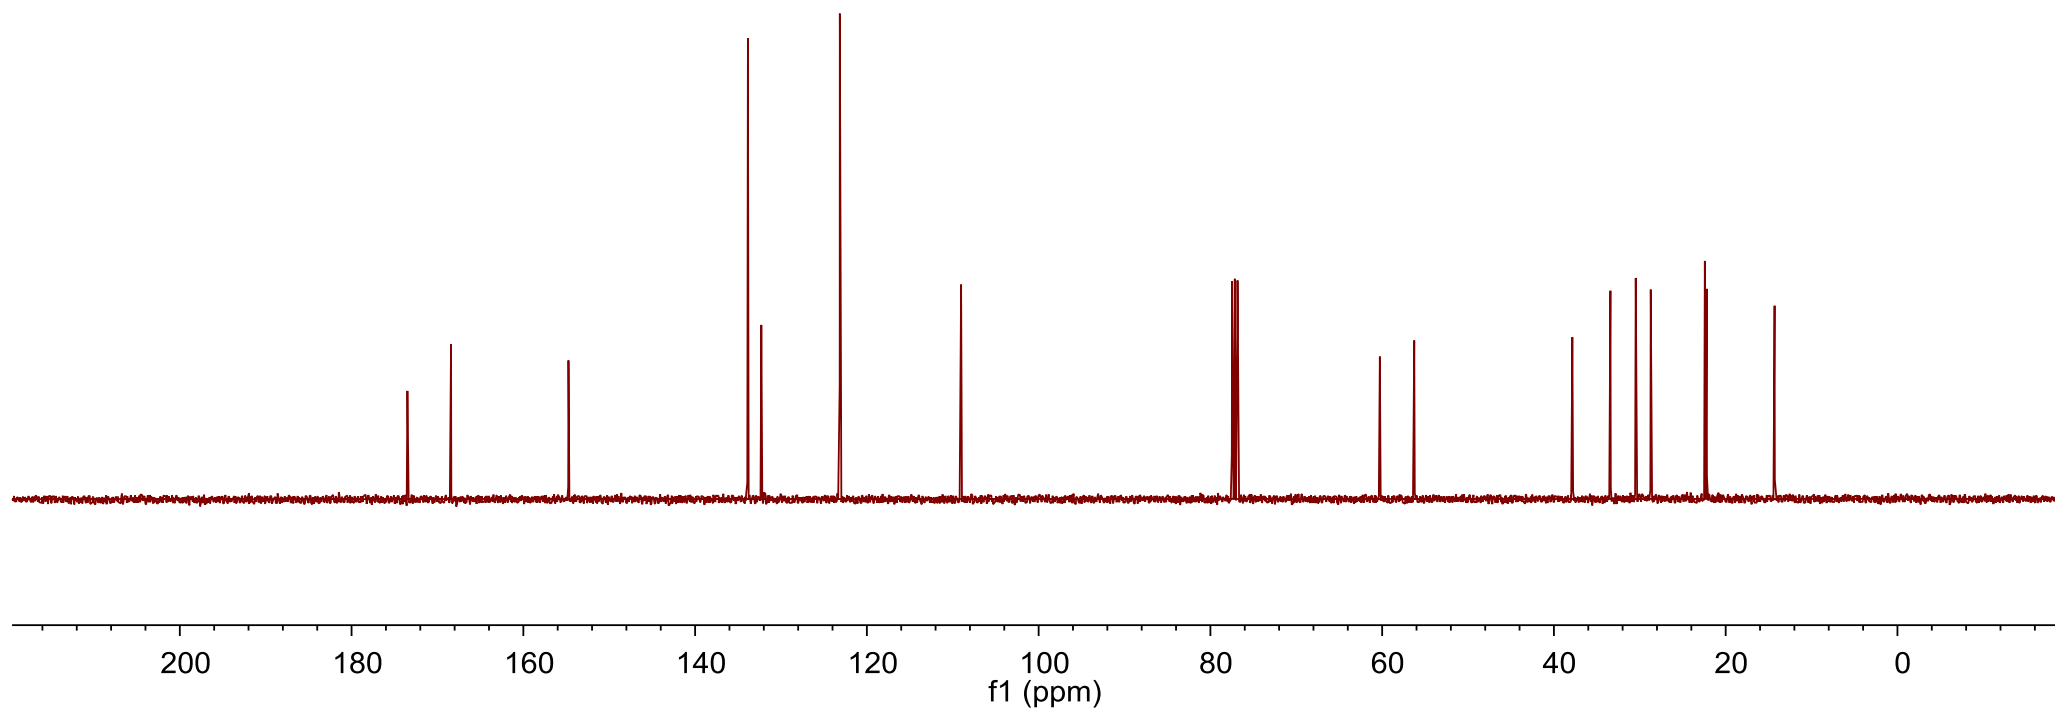

<sup>13</sup>C NMR Spectrum of 12c

CDCl<sub>3</sub>, 400.13 MHz

4.55  
4.53  
4.52

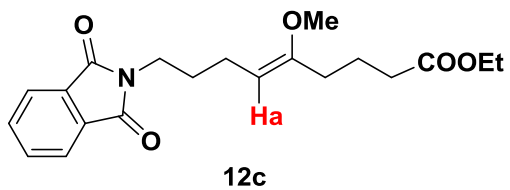

Ha

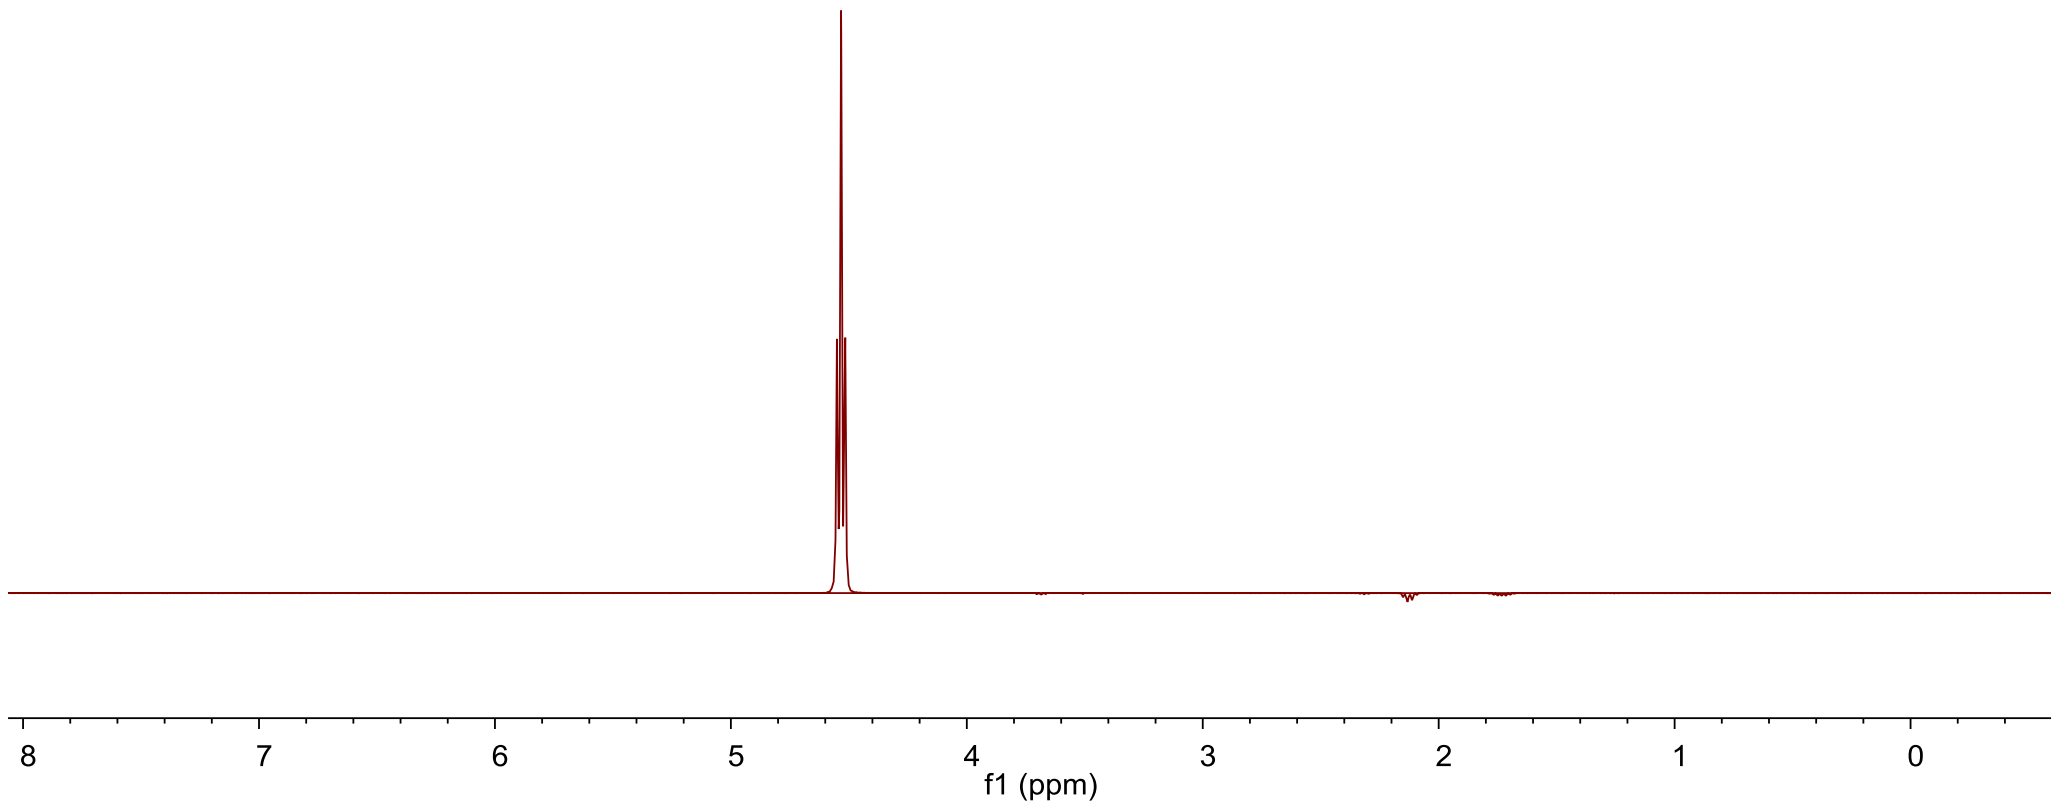

1D-NOE Spectrum of **12c**



CDCl<sub>3</sub>, 400.13 MHz

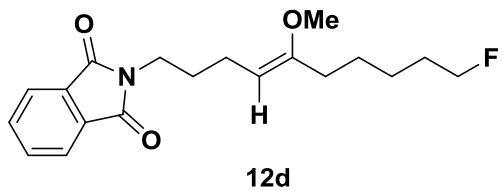

4.53  
4.51  
4.51  
4.49  
4.48  
4.39  
4.38  
4.36  
— 3.50

— 0.00

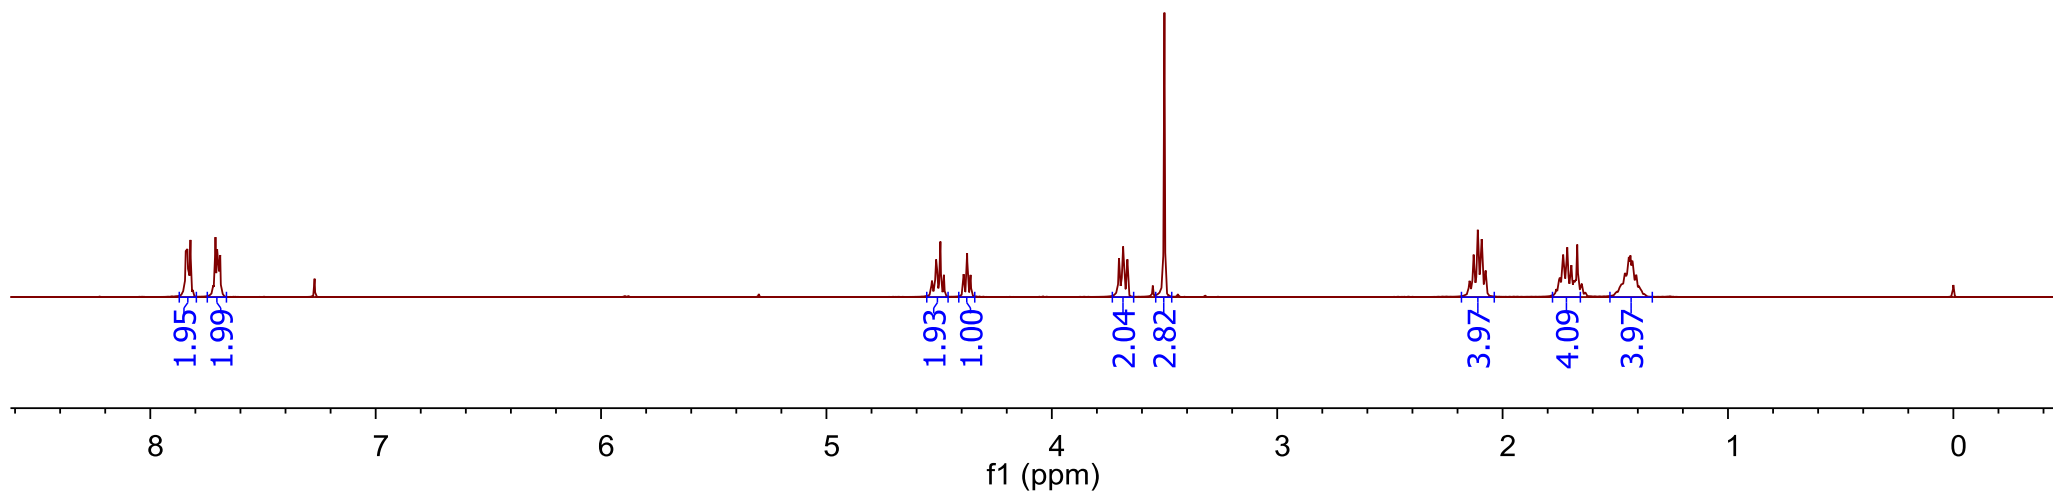

<sup>1</sup>H NMR Spectrum of **12d**

CDCl<sub>3</sub>, 100.61 MHz

— 168.53

— 155.59

— 133.91

— 132.38

— 123.22

— 108.41

— 84.99

— 83.35

— 56.32

— 37.96

— 31.13

— 30.46

— 30.27

— 28.81

— 26.86

— 24.84

— 24.79

— 22.27

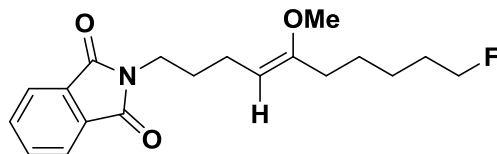

12d

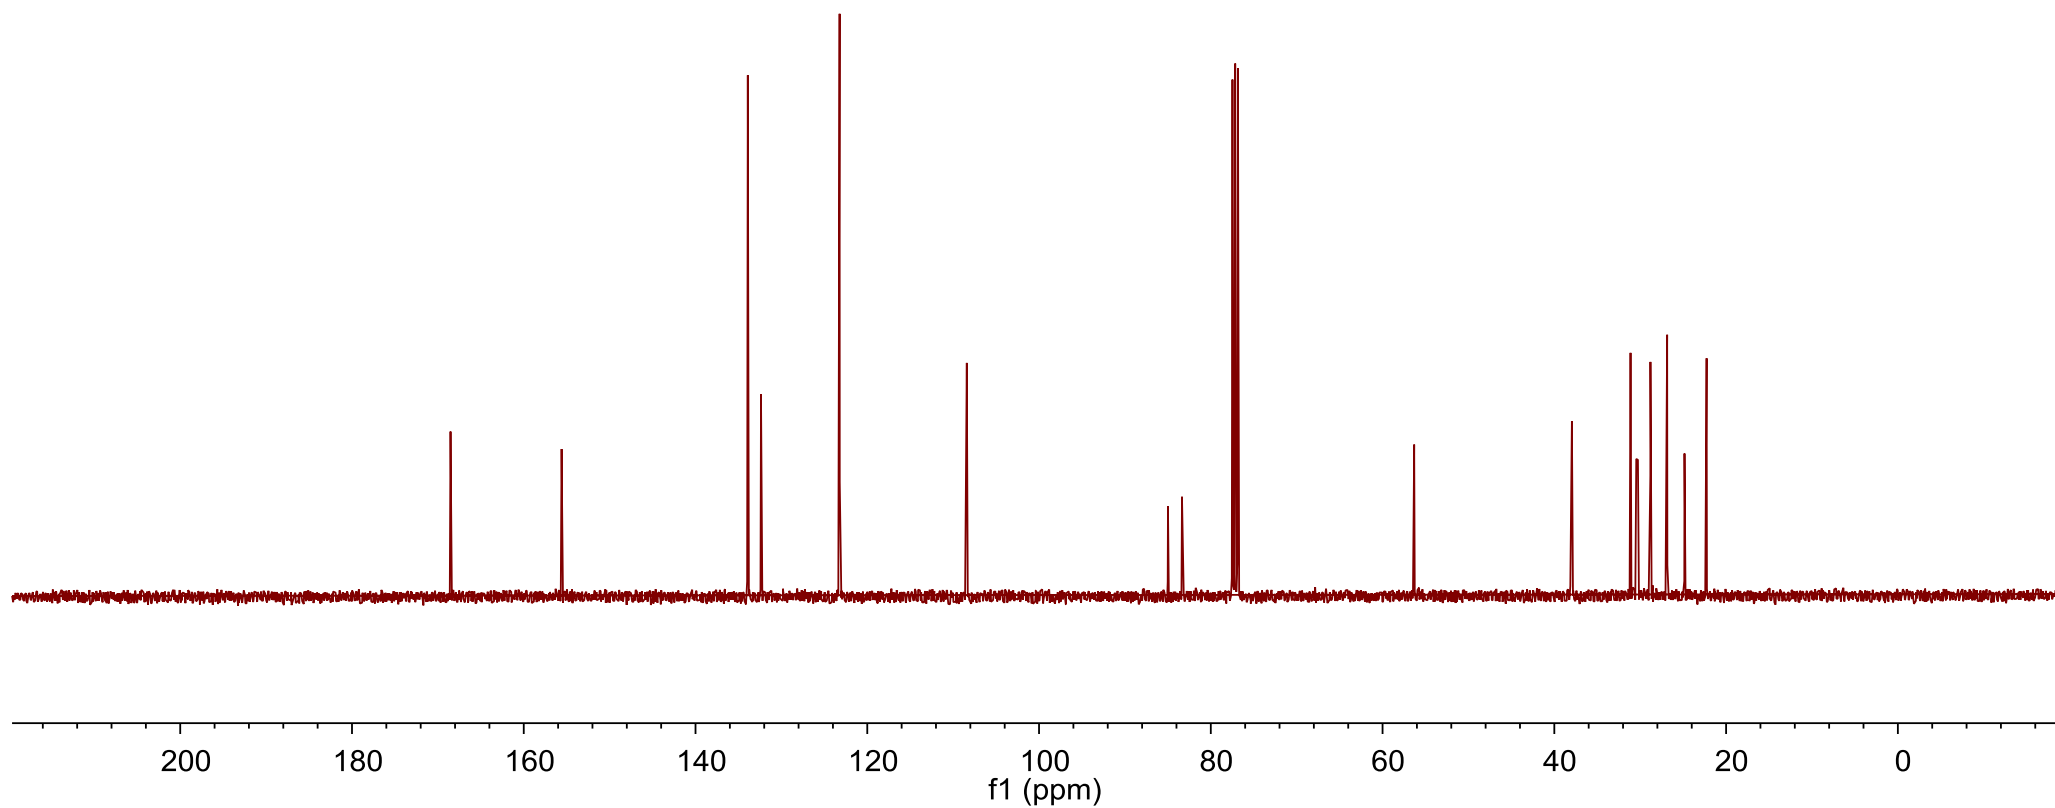

<sup>13</sup>C NMR Spectrum of 12d

CDCl<sub>3</sub>, 400.13 MHz

4.51  
4.49  
4.48  
4.39  
4.38  
4.36

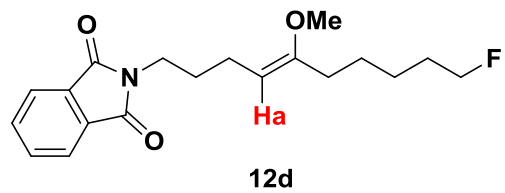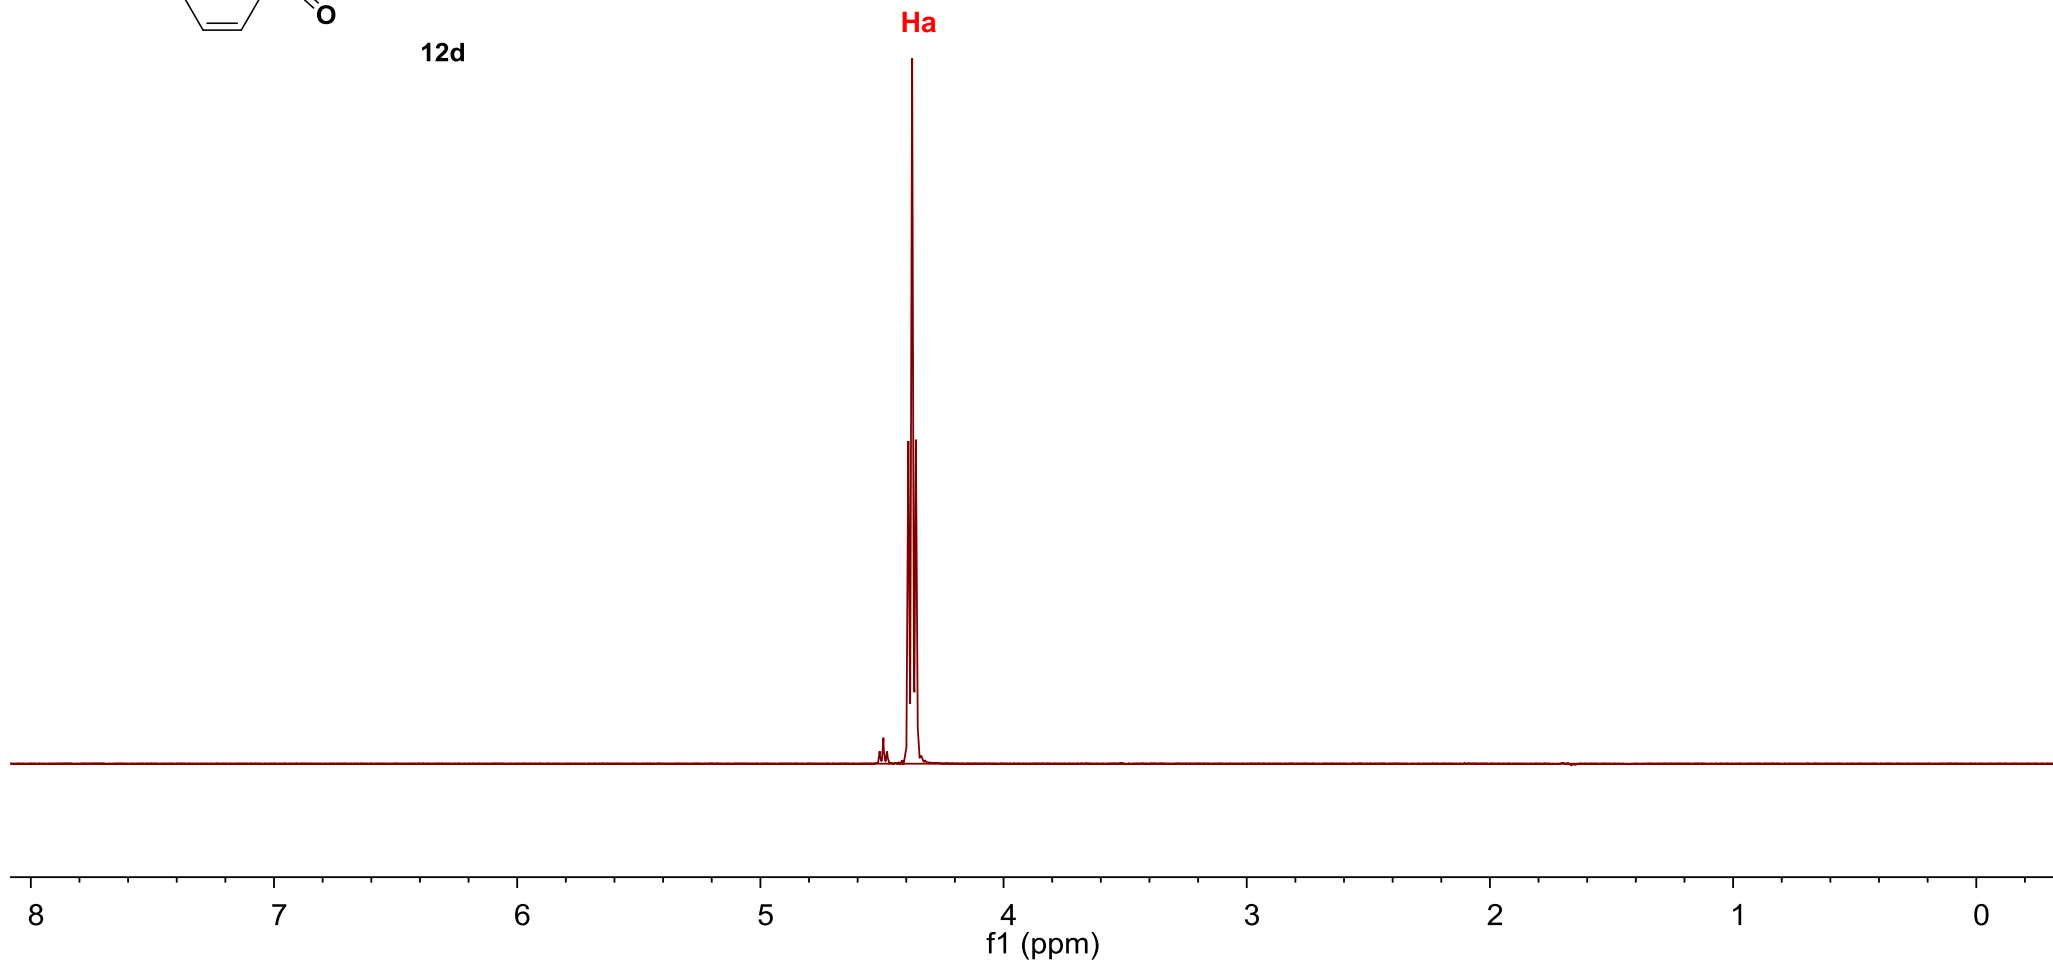

1D-NOE Spectrum of **12d**

CDCl<sub>3</sub>, 376.50 MHz

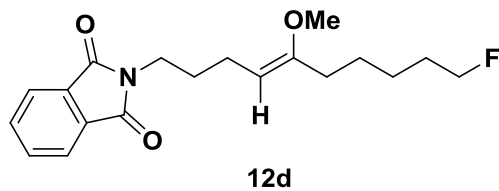

-218.07

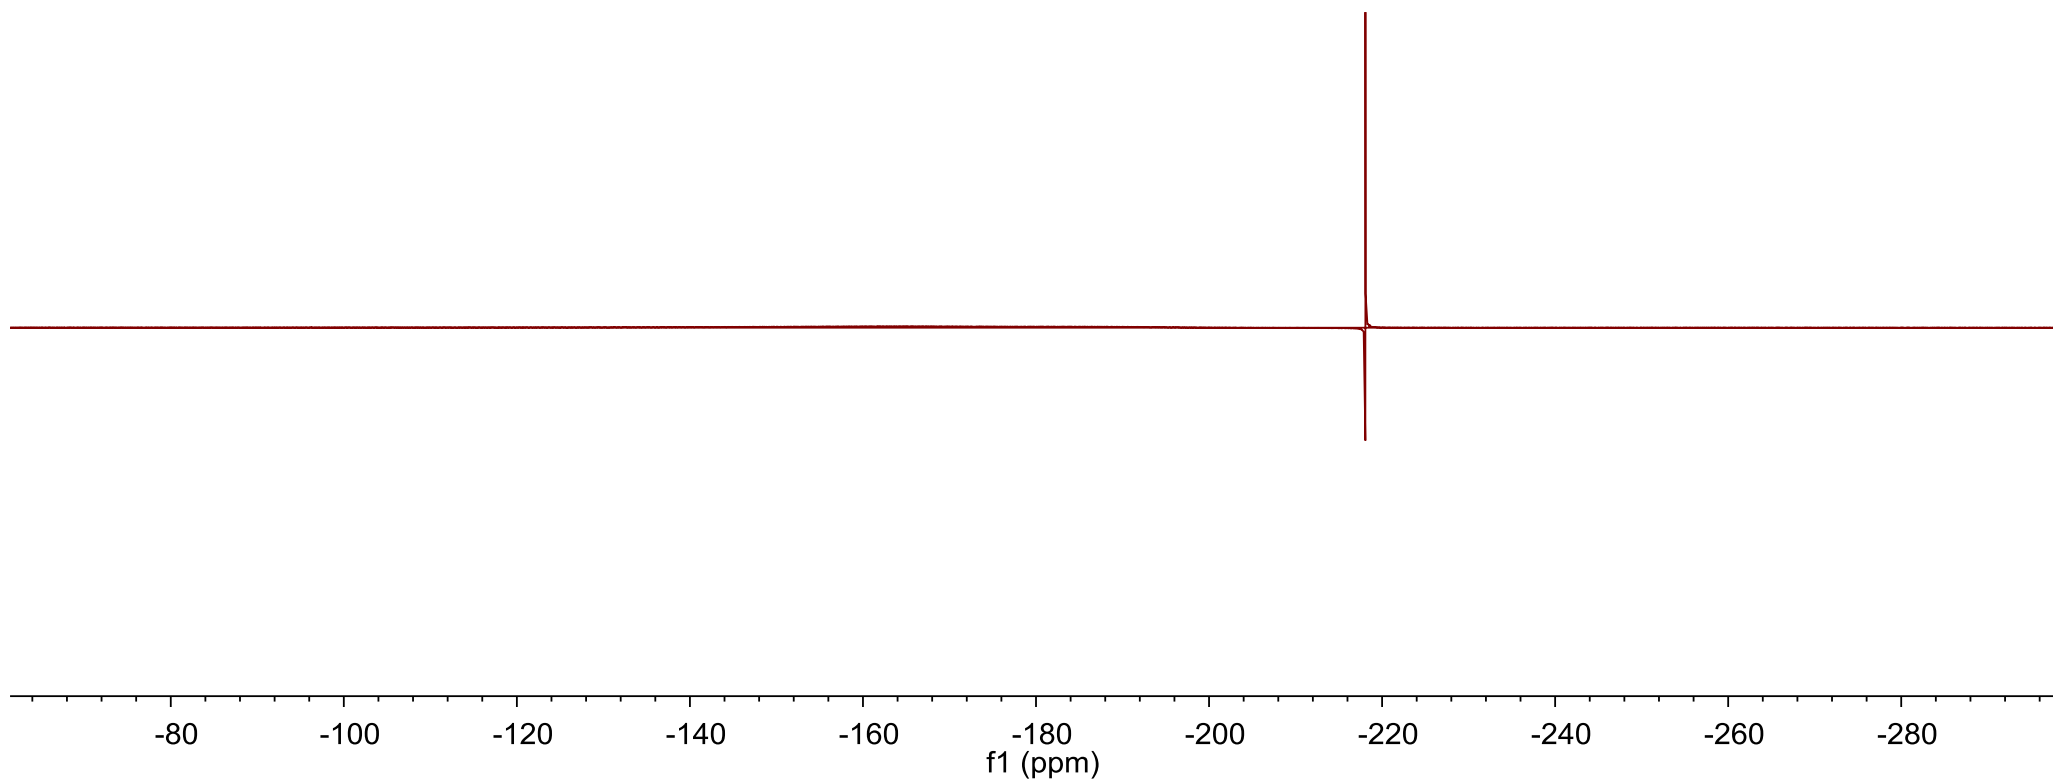

<sup>19</sup>F NMR Spectrum of **12d**

CDCl<sub>3</sub>, 400.13 MHz

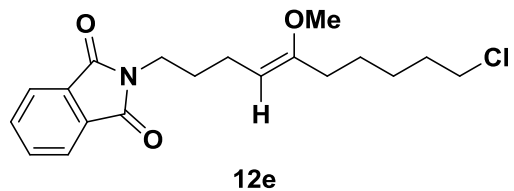

4.53  
4.51  
4.50

3.50

-0.00

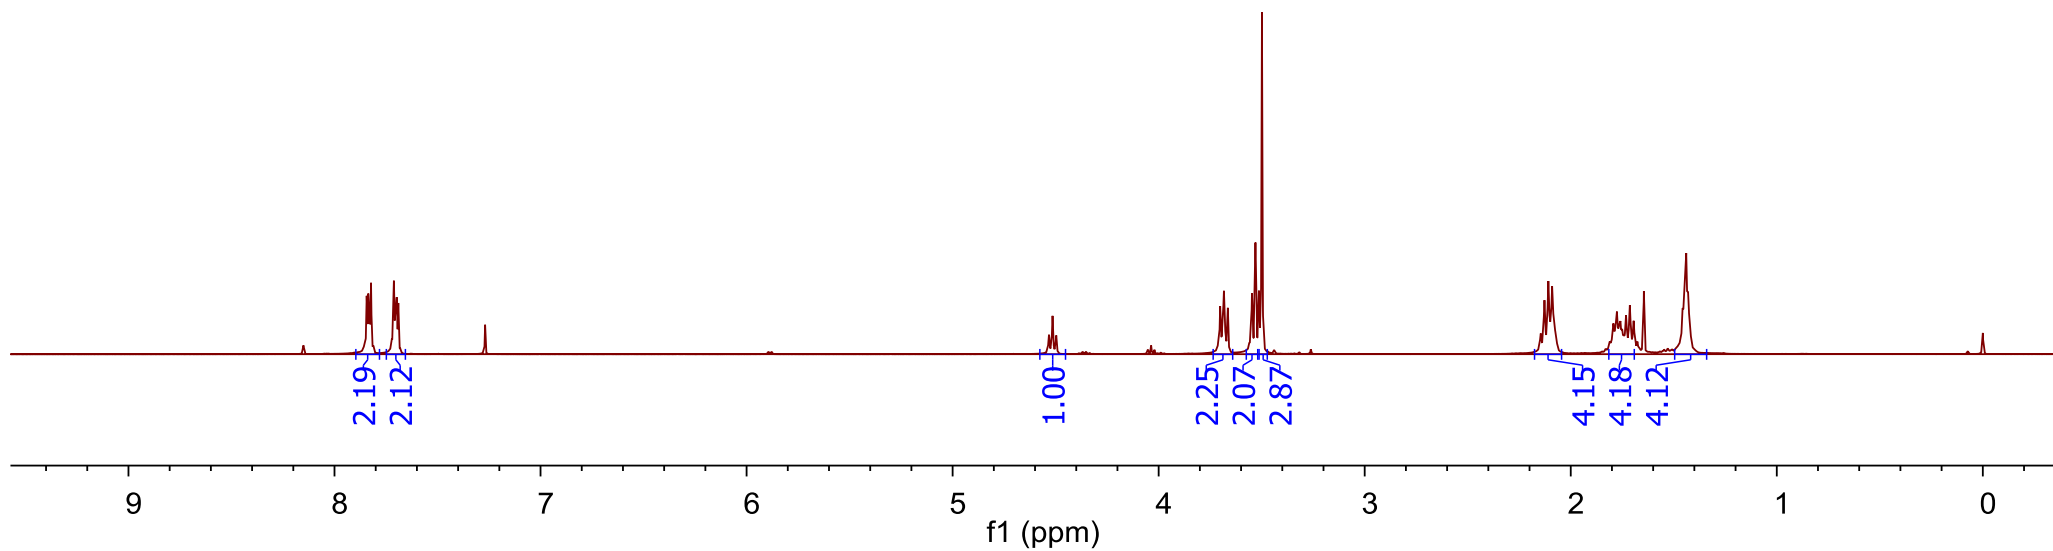

<sup>1</sup>H NMR Spectrum of **12e**

CDCl<sub>3</sub>, 100.61 MHz

168.54  
155.54  
133.92  
132.38  
123.23  
108.50  
56.35  
45.12  
37.96  
32.60  
31.09  
28.80  
26.52  
26.51  
26.52  
26.51

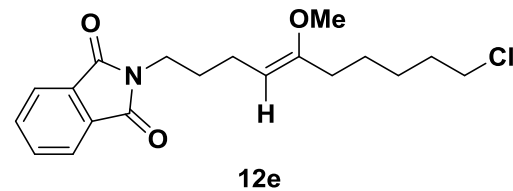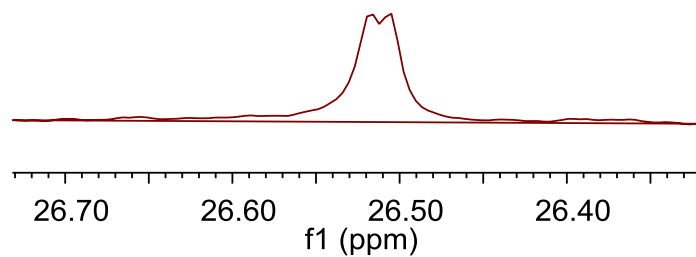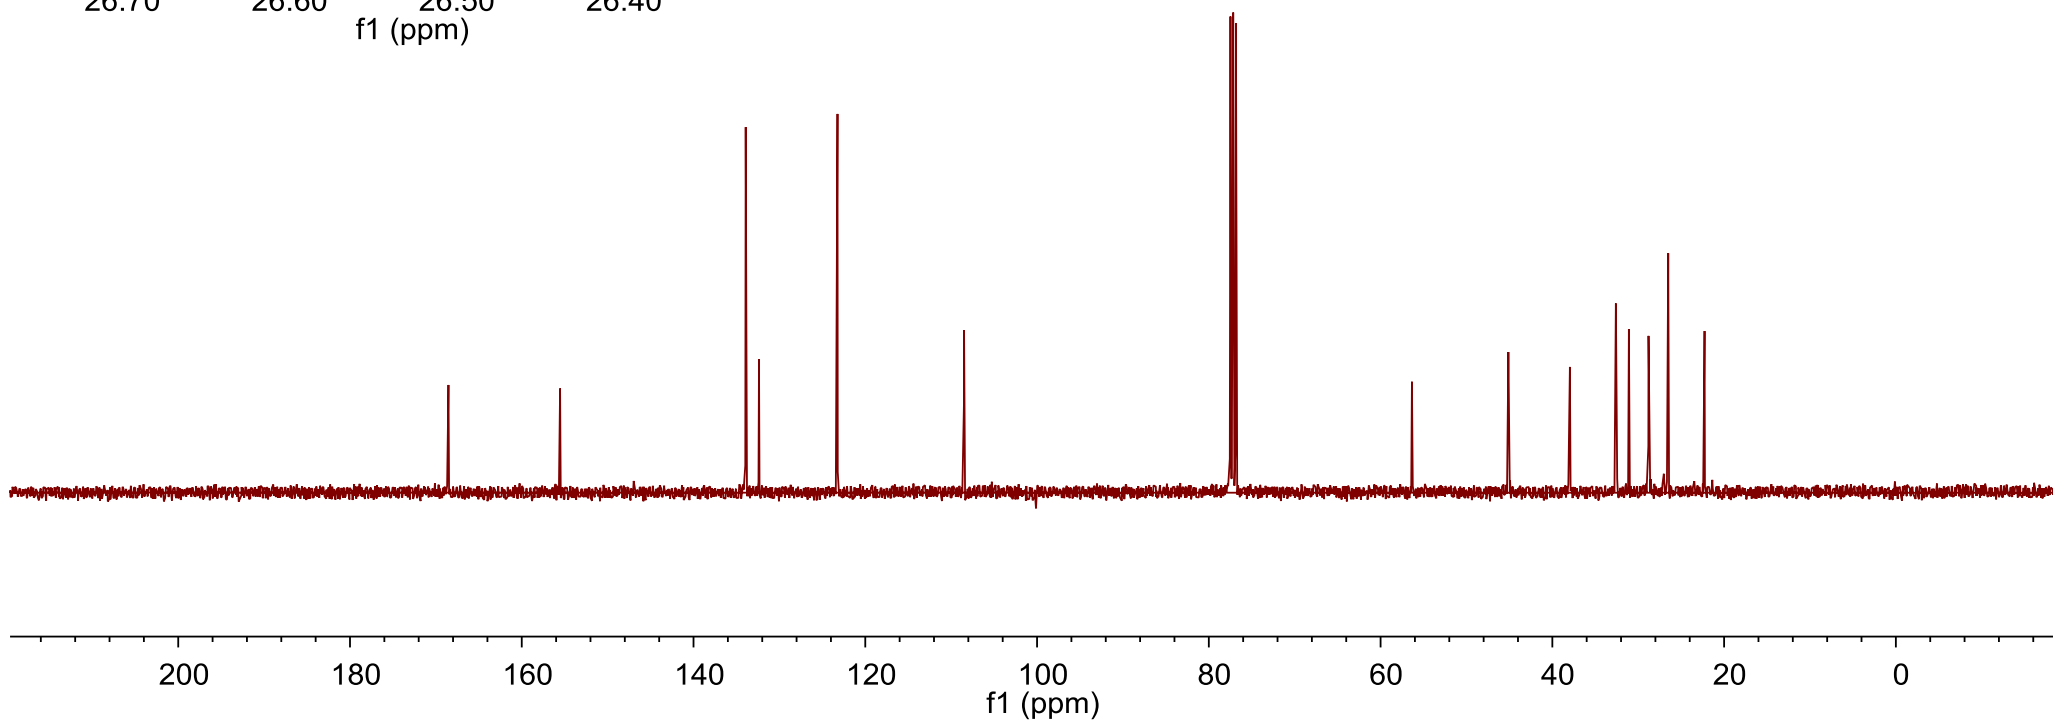

<sup>13</sup>C NMR Spectrum of 12e

CDCl<sub>3</sub>, 400.13 MHz

4.53  
4.51  
4.50

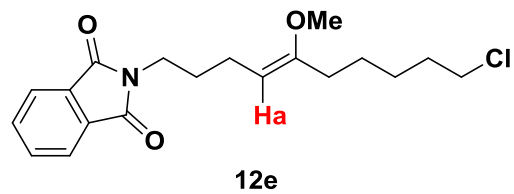

Ha

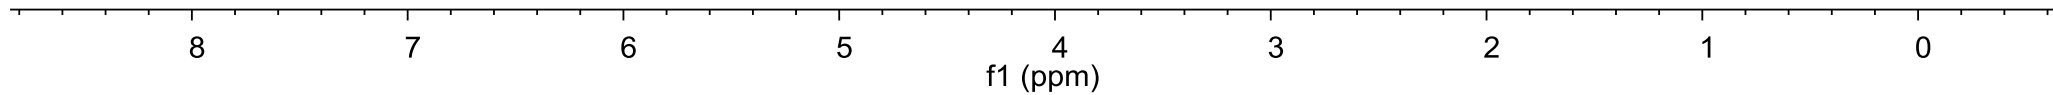

1D-NOE Spectrum of **12e**

CDCl<sub>3</sub>, 400.13 MHz

— 7.26

{ 4.51  
4.49  
4.47

— 3.48

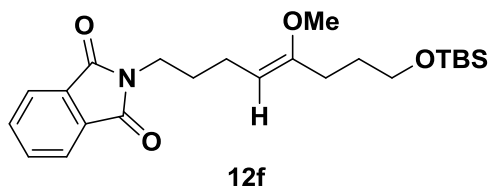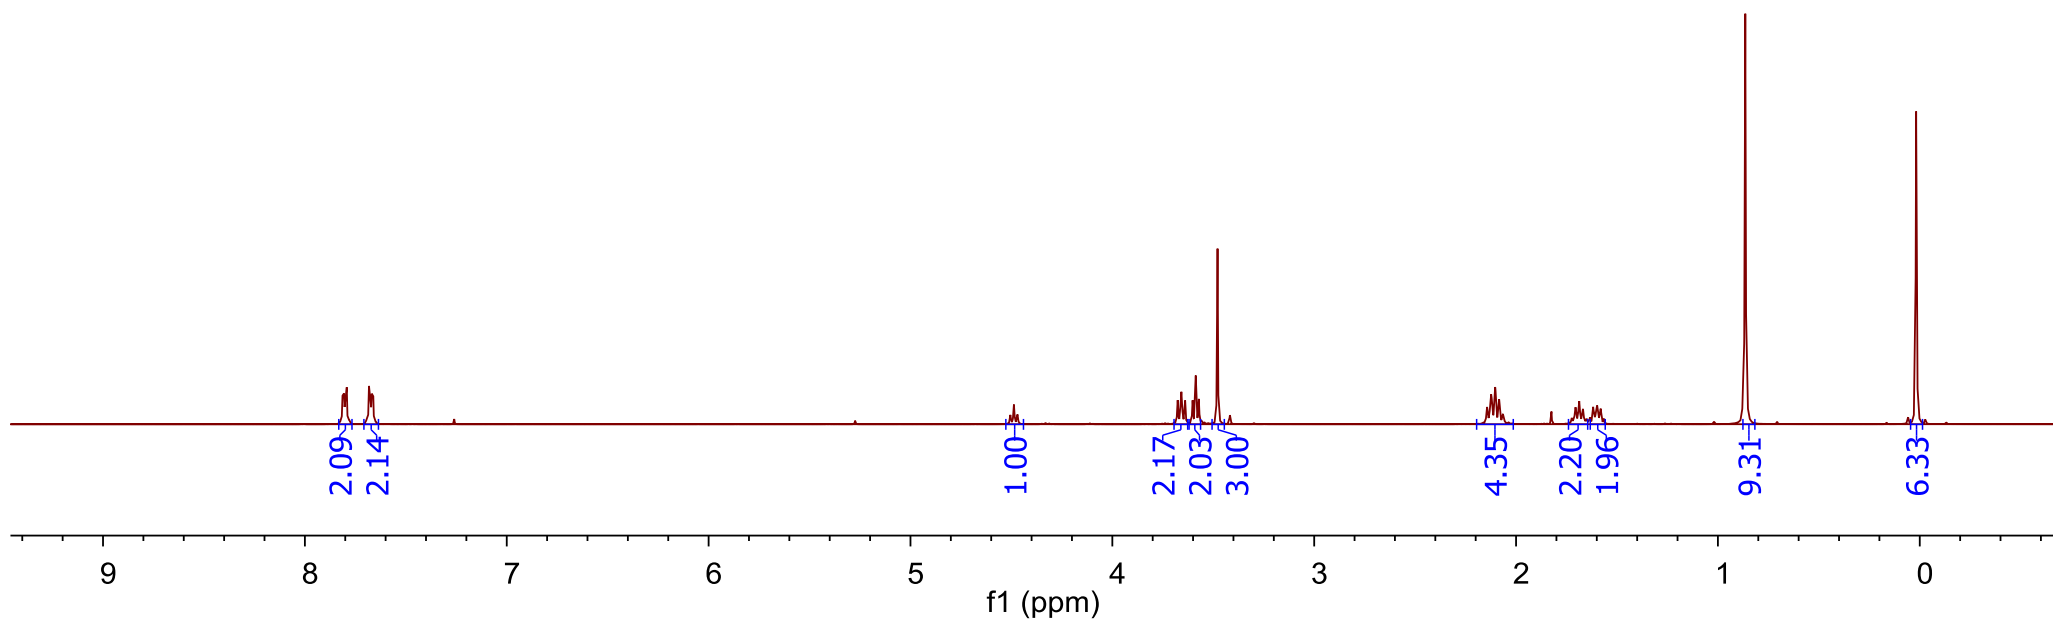

<sup>1</sup>H NMR Spectrum of **12f**



CDCl<sub>3</sub>, 100.61 MHz

— 168.45

— 155.55

— 133.86

— 132.35

— 123.17

— 108.05

— 62.40

— 56.12

— 37.95

— 30.48

— 28.79

— 27.48

— 26.03

— 22.25

— 18.38

— -5.22

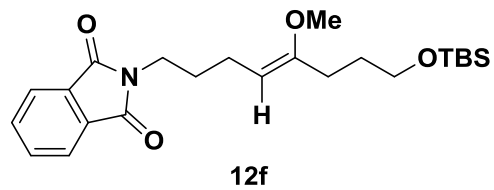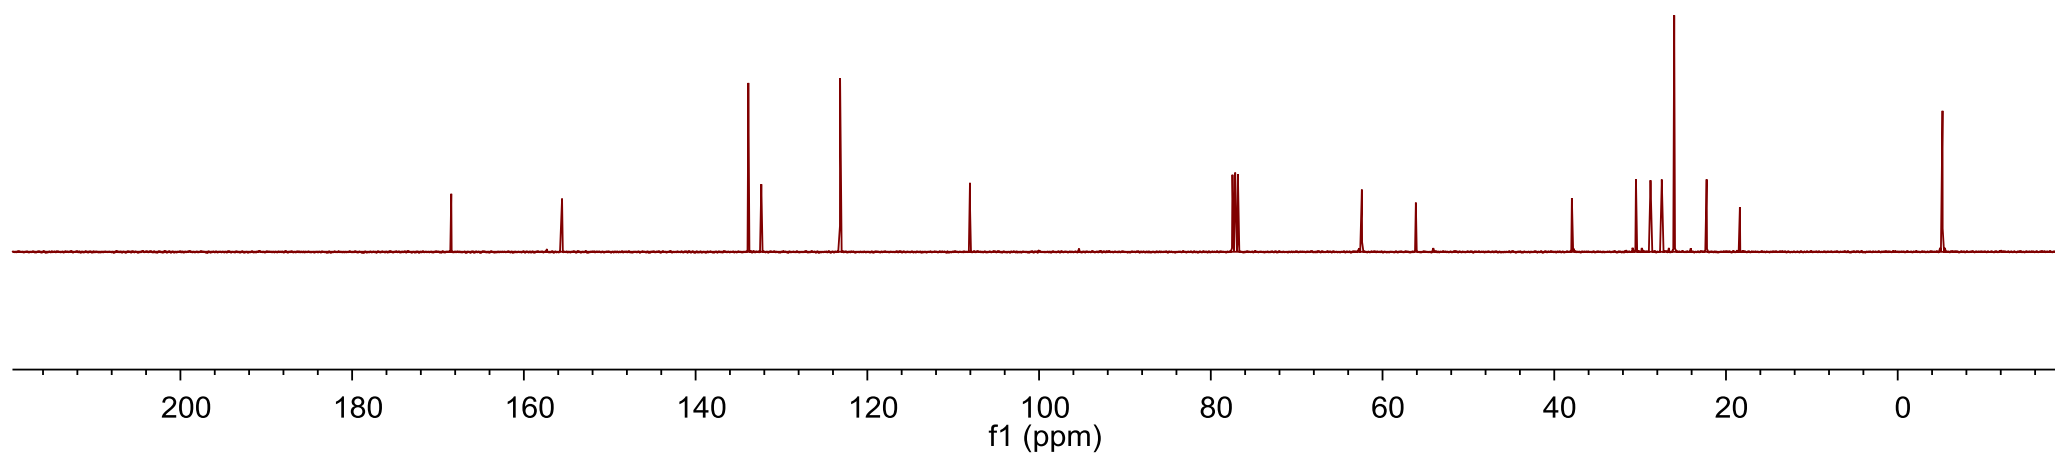

<sup>13</sup>C NMR Spectrum of **12f**

CDCl<sub>3</sub>, 400.13 MHz

4.49  
4.47  
4.46

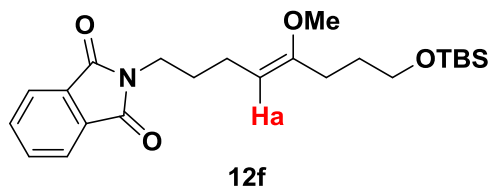

Ha

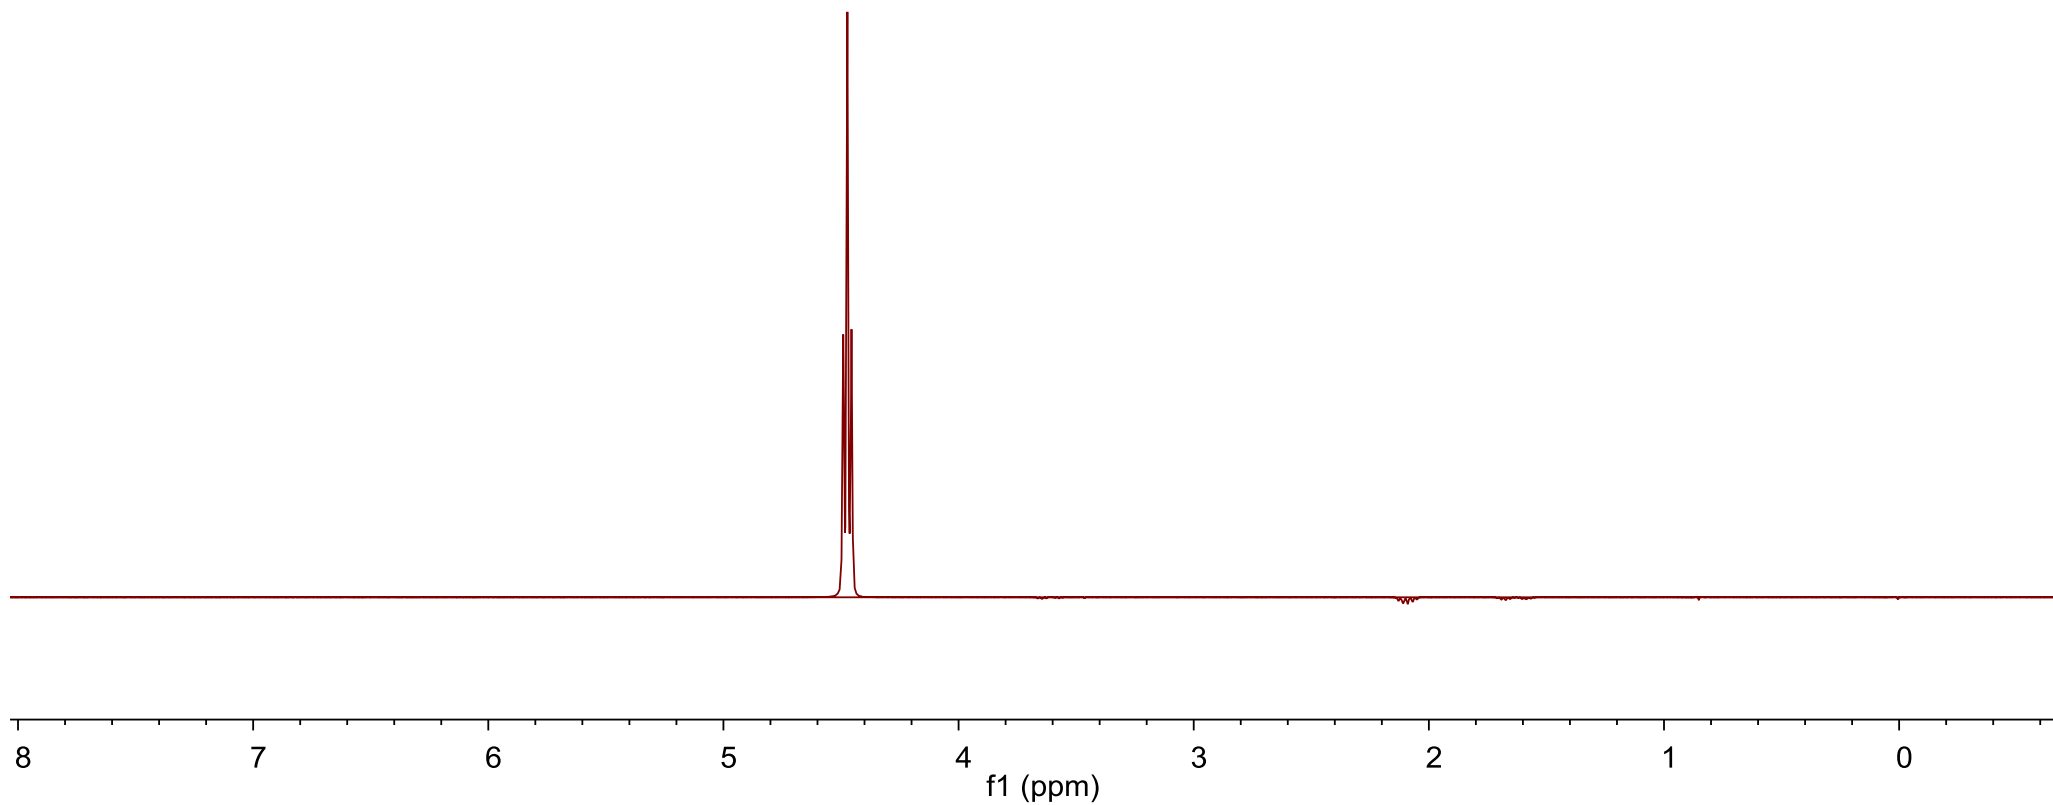

1D-NOE Spectrum of **12f**

CDCl<sub>3</sub>, 400.13 MHz

4.57  
4.55  
4.53

3.50

-0.00

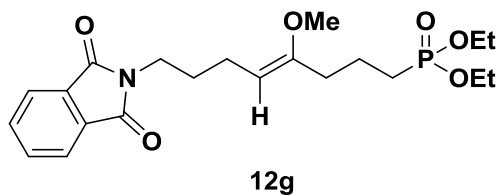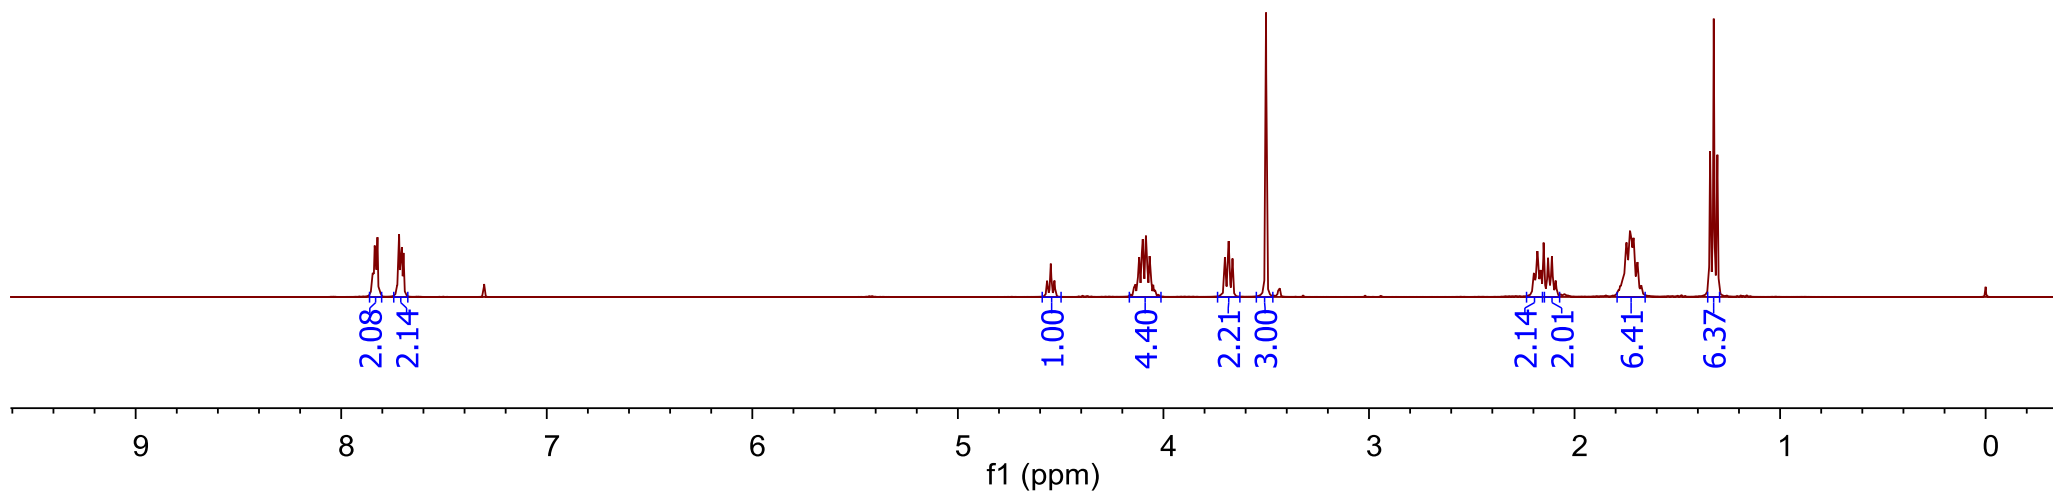

<sup>1</sup>H NMR Spectrum of **12g**

CDCl<sub>3</sub>, 100.61 MHz

— 168.43

— 154.45

— 133.87

— 132.28

— 123.16

— 109.47

61.53

61.47

56.39

37.85

31.91

31.75

28.74

25.56

24.16

22.23

20.11

20.07

16.56

16.50

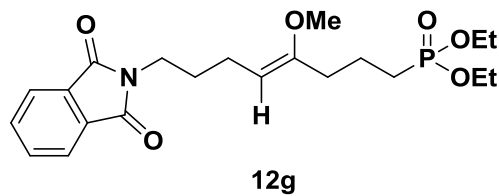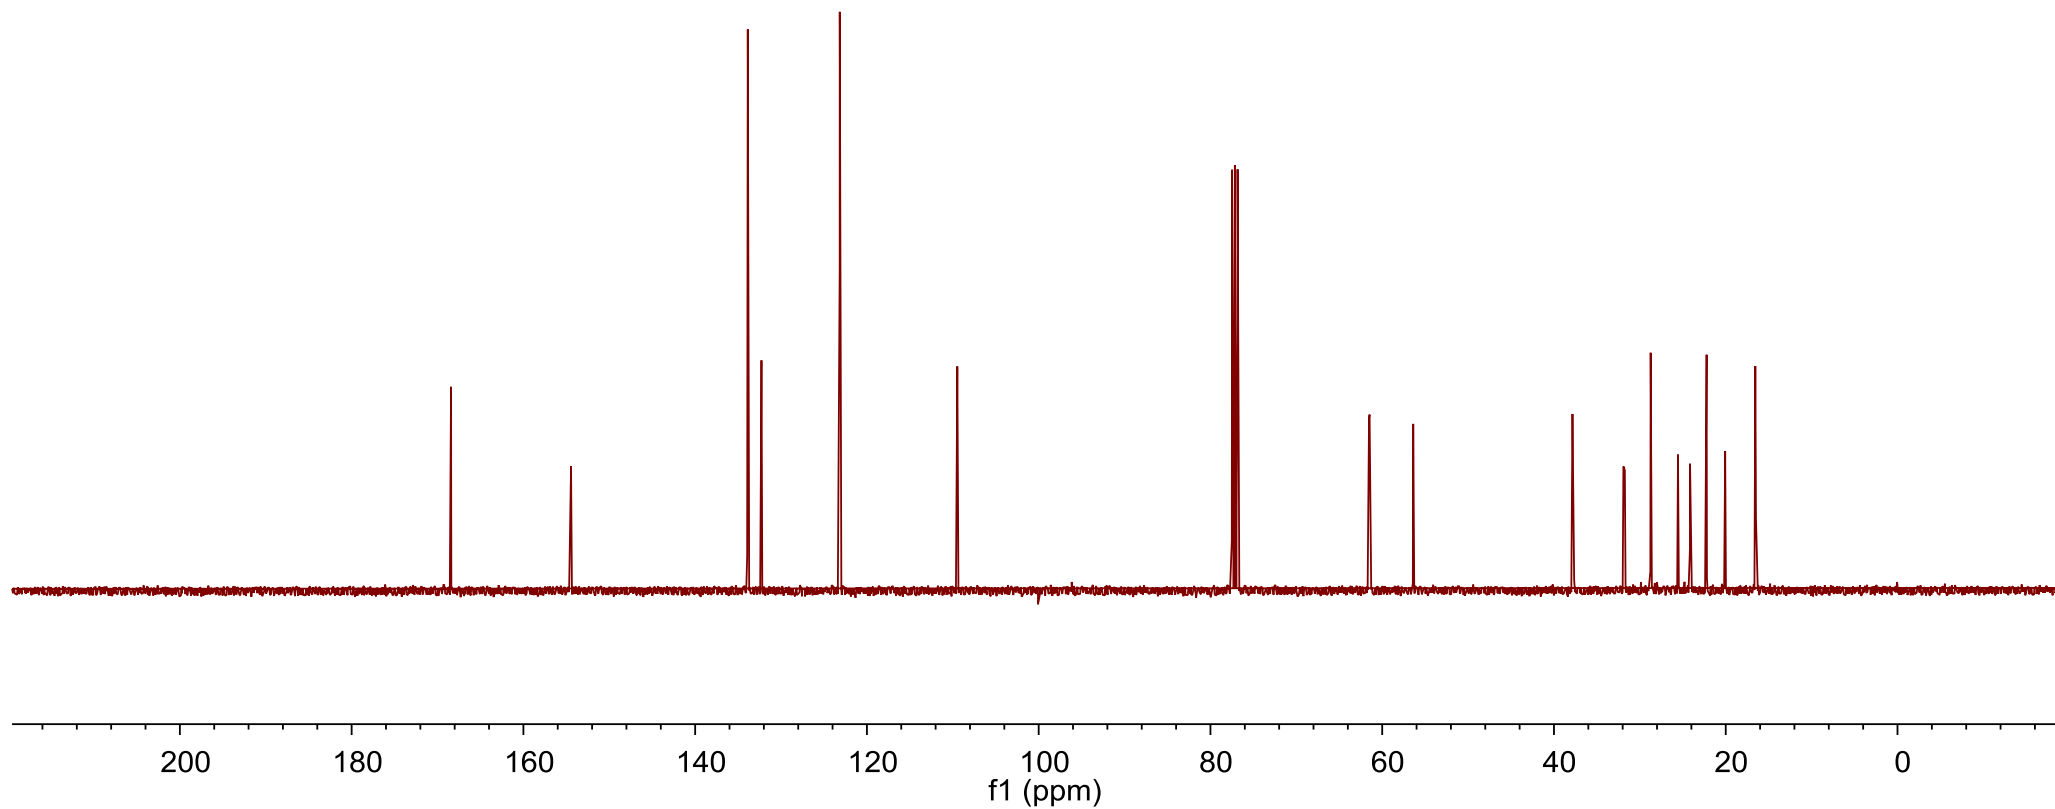

<sup>13</sup>C NMR Spectrum of **12g**

CDCl<sub>3</sub>, 400.13 MHz

4.57  
4.55  
4.53

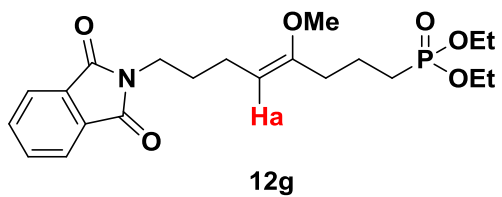

Ha

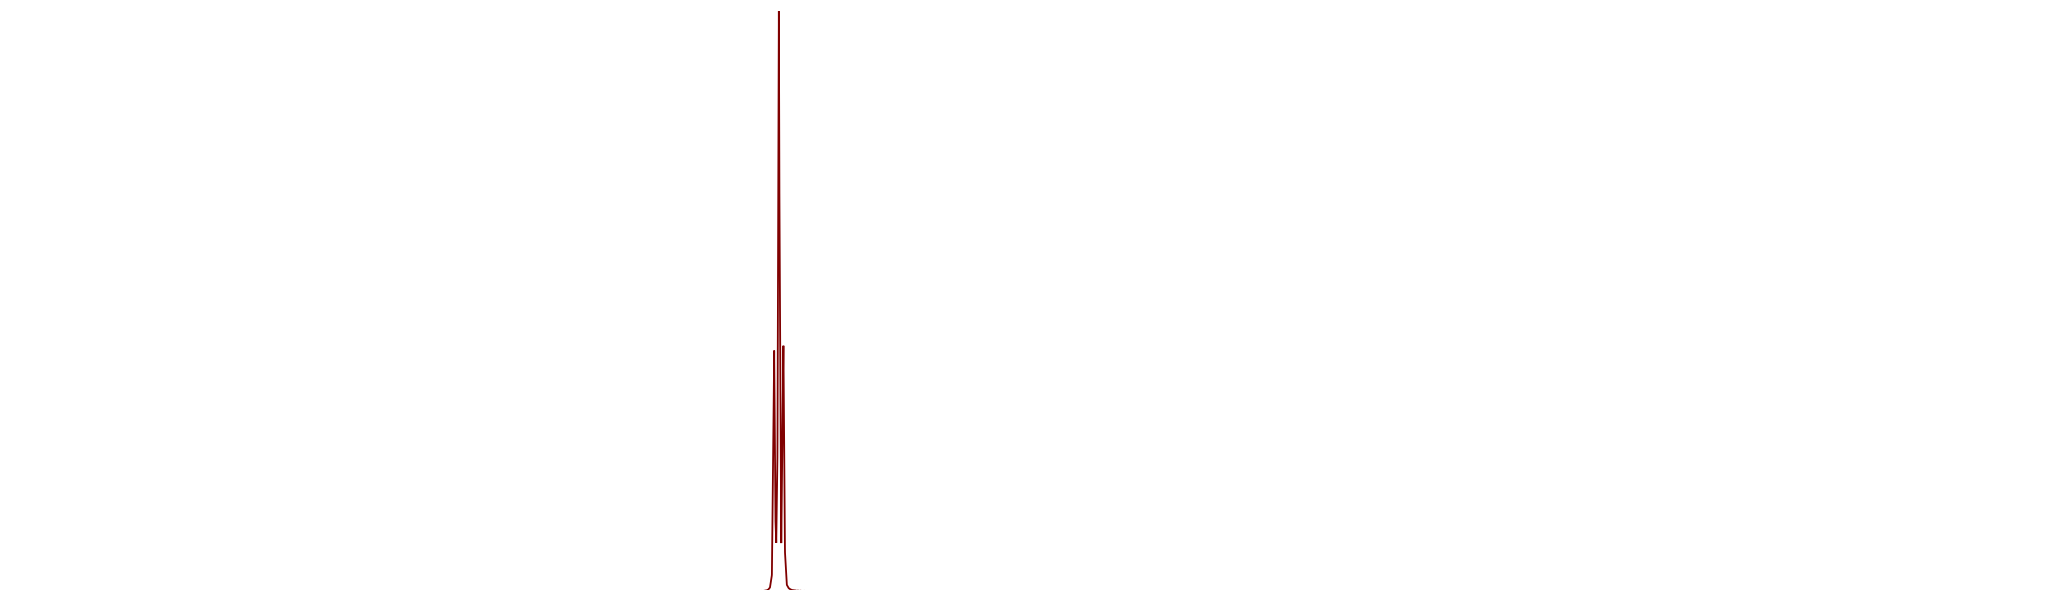

7

6

5

4

f1 (ppm)

3

2

1

0

1D-NOE Spectrum of **12g**

CDCl<sub>3</sub>, 161.98 MHz

— 32.13

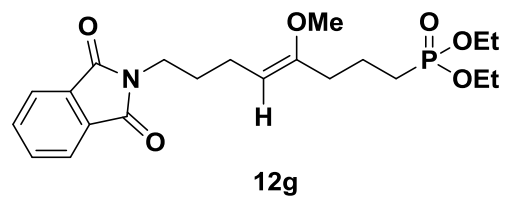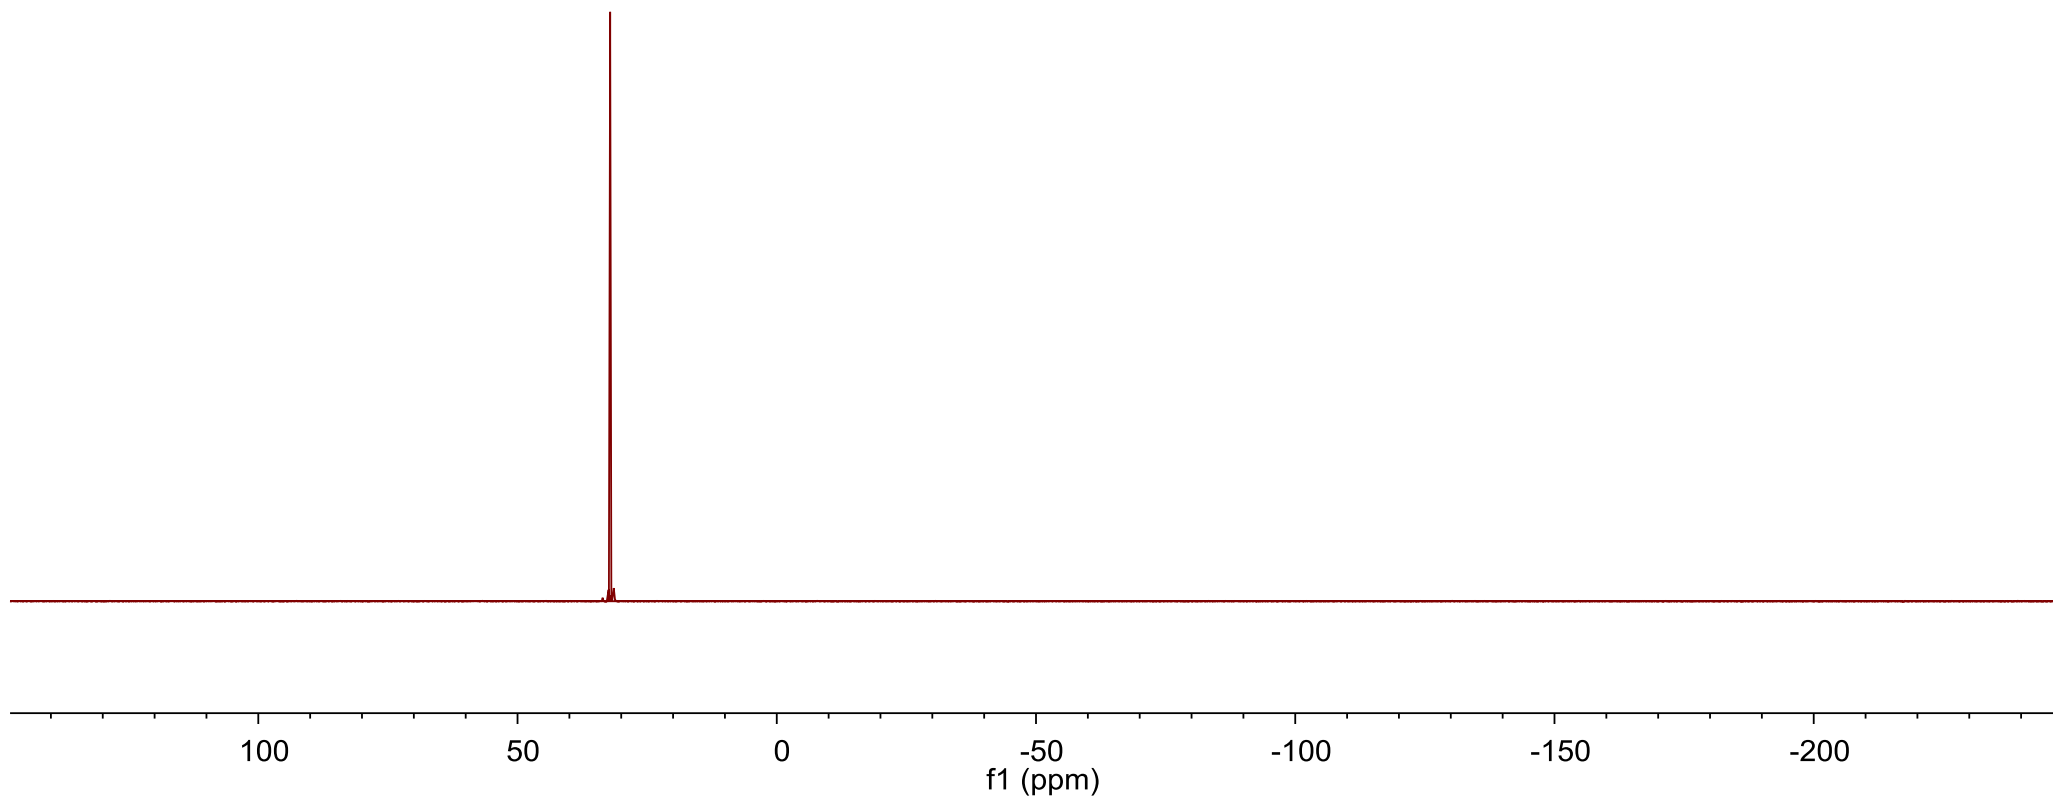

<sup>31</sup>P NMR Spectrum of **12g**

CDCl<sub>3</sub>, 400.13 MHz

4.57  
4.55  
4.53

3.51

0.00

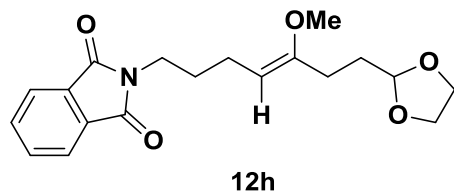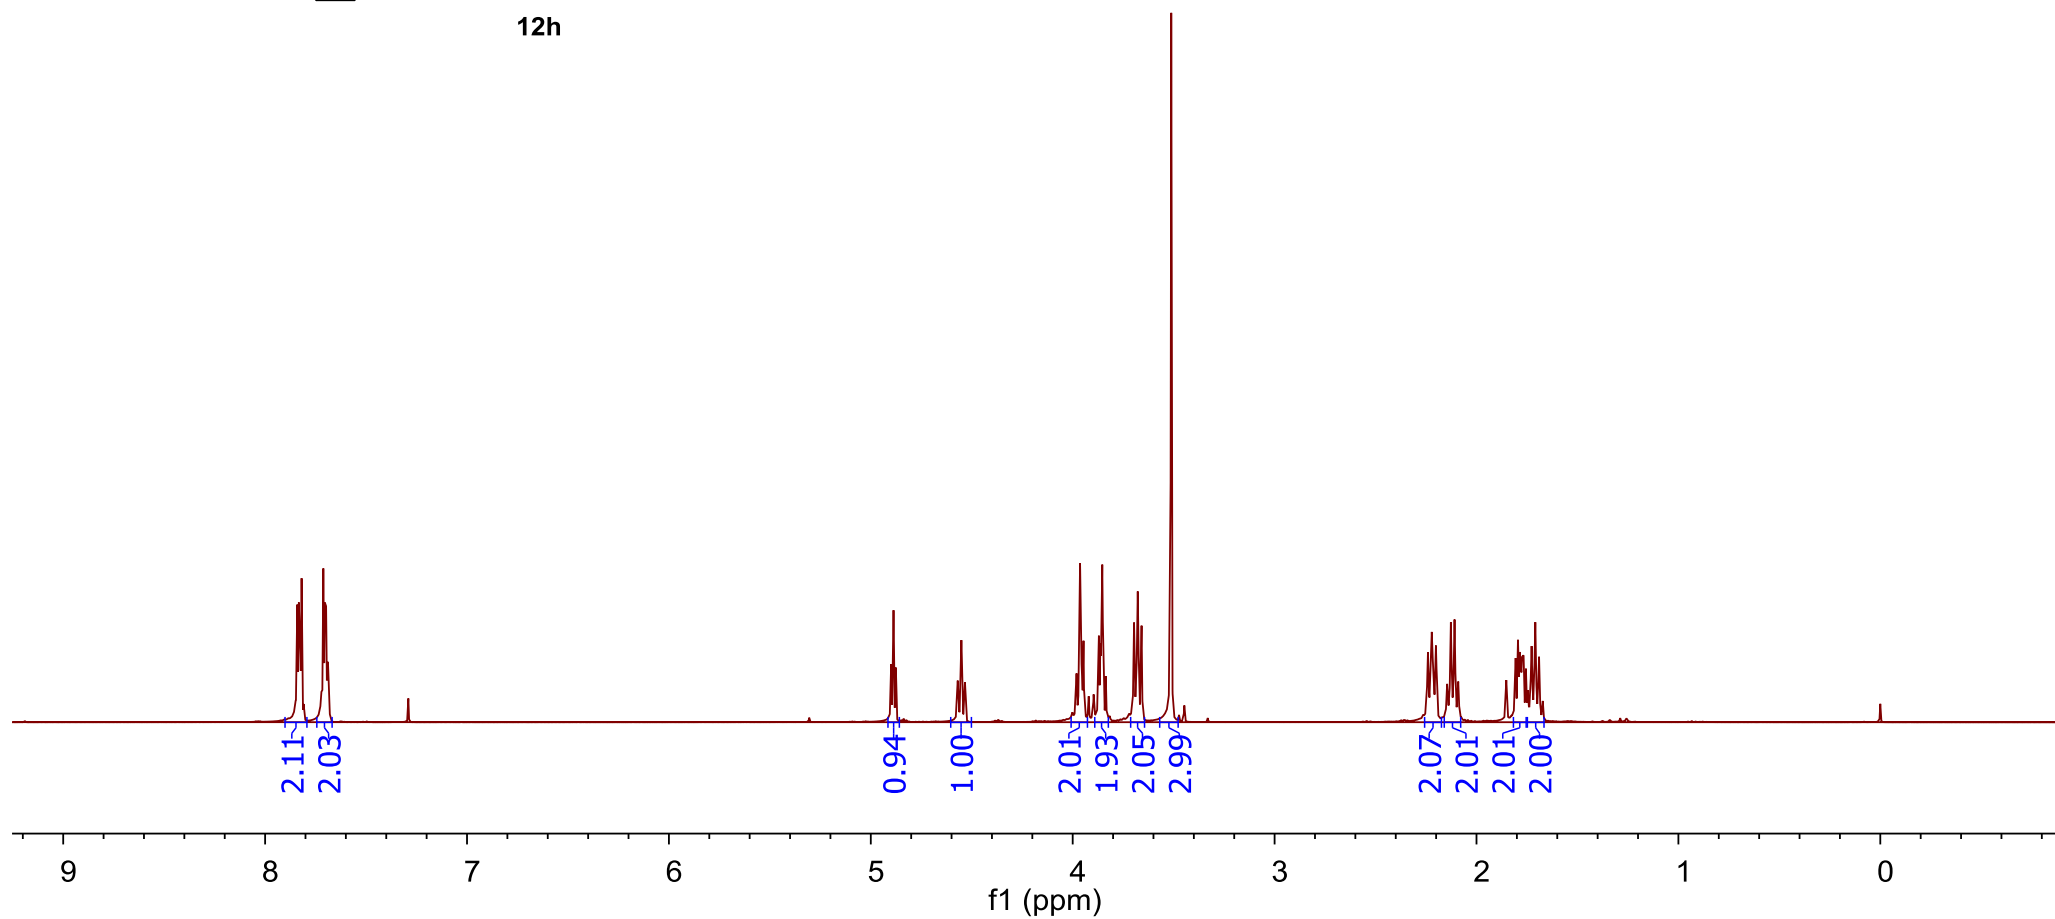

<sup>1</sup>H NMR Spectrum of **12h**

CDCl<sub>3</sub>, 100.61 MHz

— 168.45

— 155.09

∧ 133.86

∧ 132.32

— 123.17

— 108.37

— 103.92

— 65.00

— 56.29

∧ 37.89

∧ 31.57

∧ 28.72

— 25.58

∧ 22.25

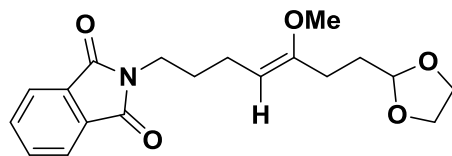

**12h**

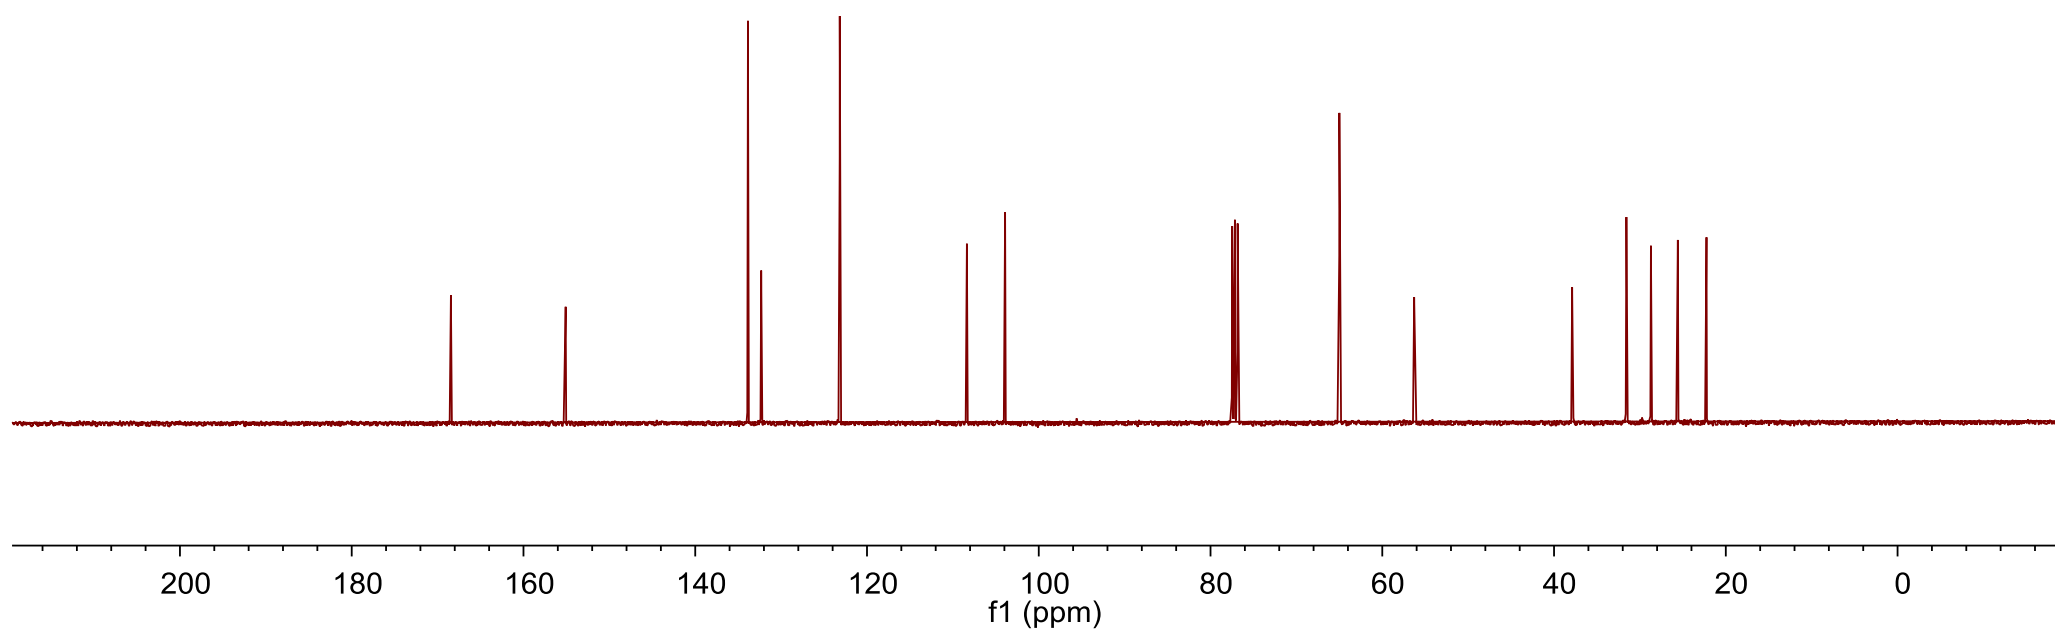

<sup>13</sup>C NMR Spectrum of **12h**



CDCl<sub>3</sub>, 400.13 MHz

4.57  
4.55  
4.53

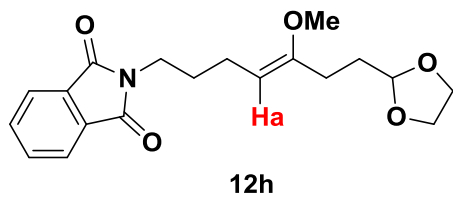

Ha

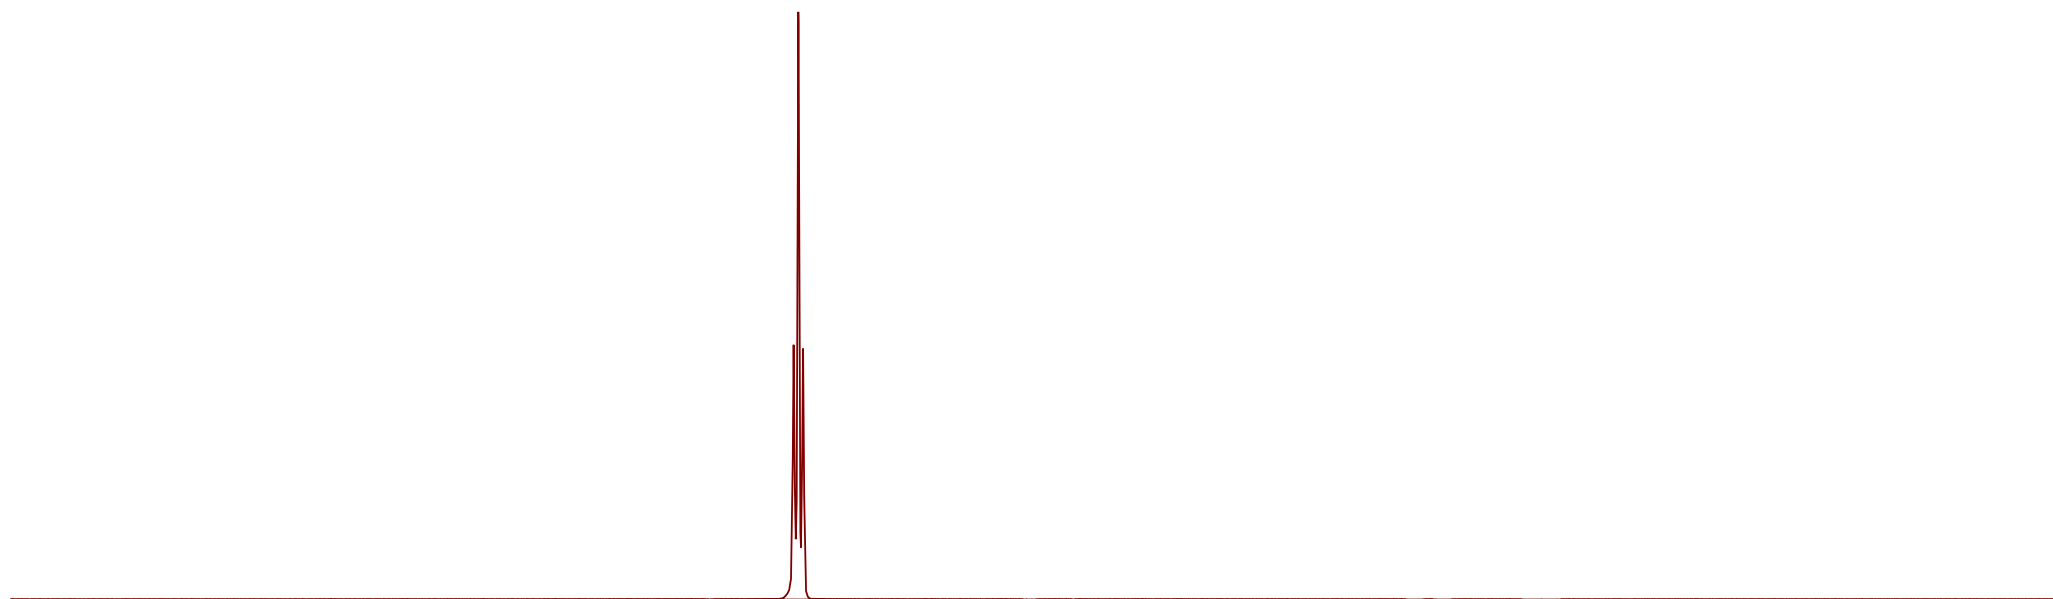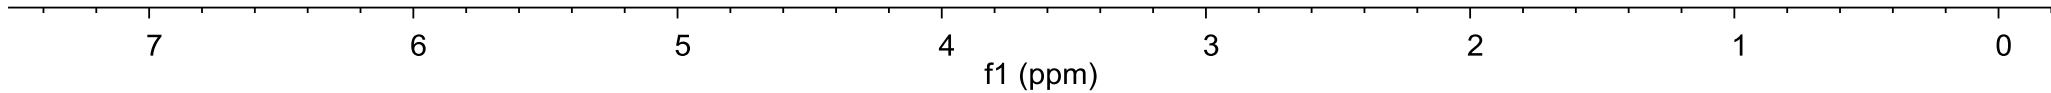

1D-NOE Spectrum of **12h**

CDCl<sub>3</sub>, 400.13 MHz

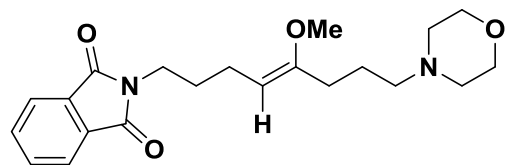

**12i**

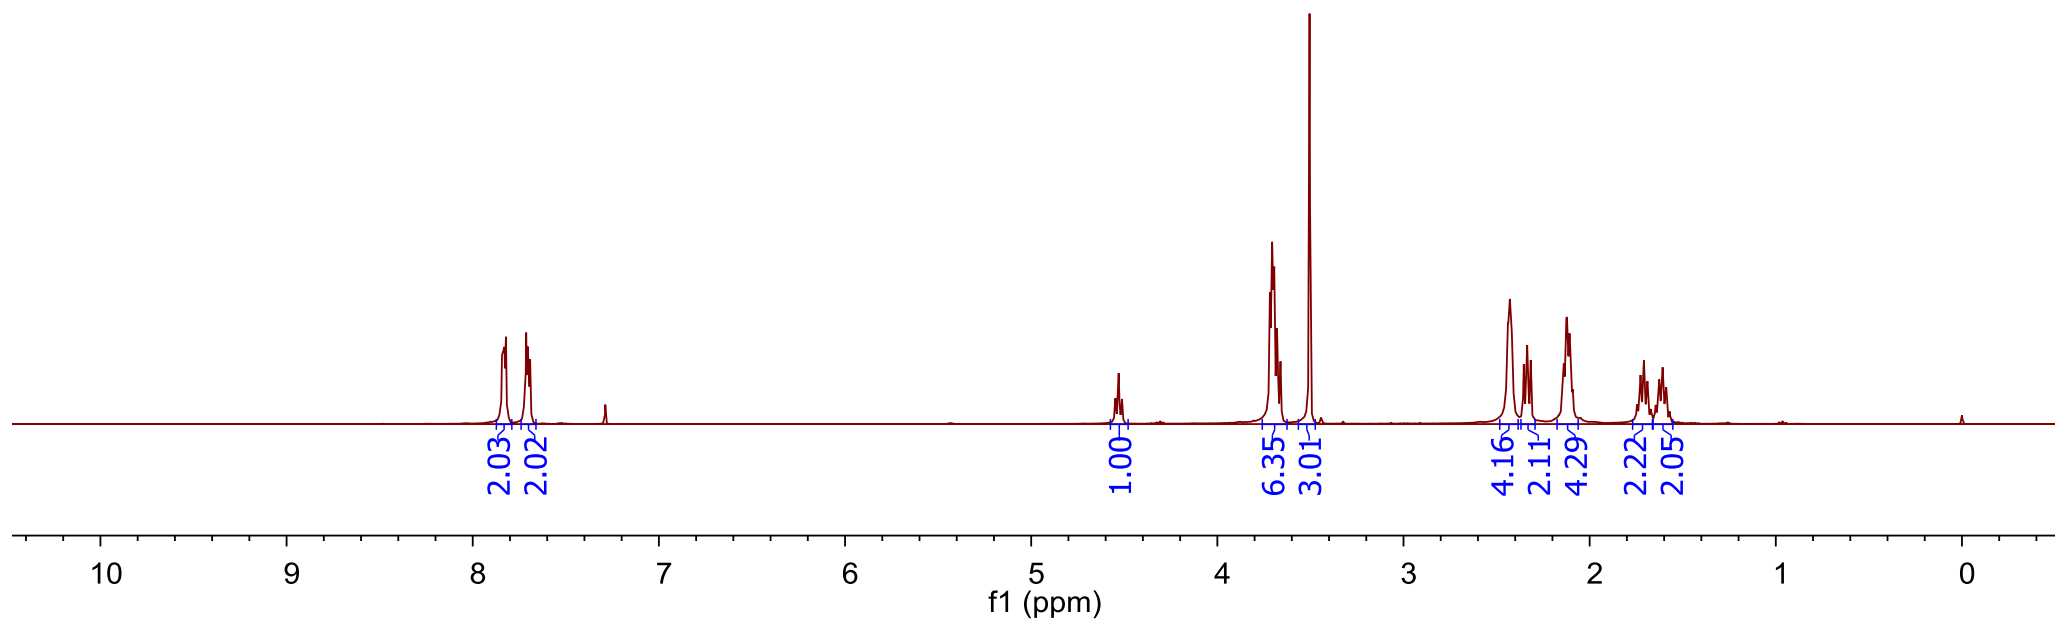

<sup>1</sup>H NMR Spectrum of **12i**

CDCl<sub>3</sub>, 100.61 MHz

— 168.47

— 155.43

— 133.89

— 132.33

— 123.19

— 108.47

— 67.12

— 58.39

— 56.32

— 53.84

— 37.90

— 28.99

— 28.78

— 24.18

— 22.24

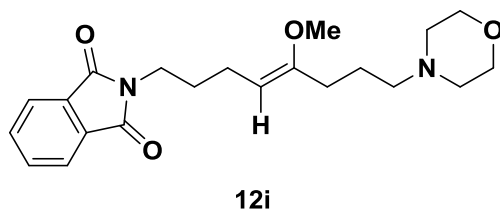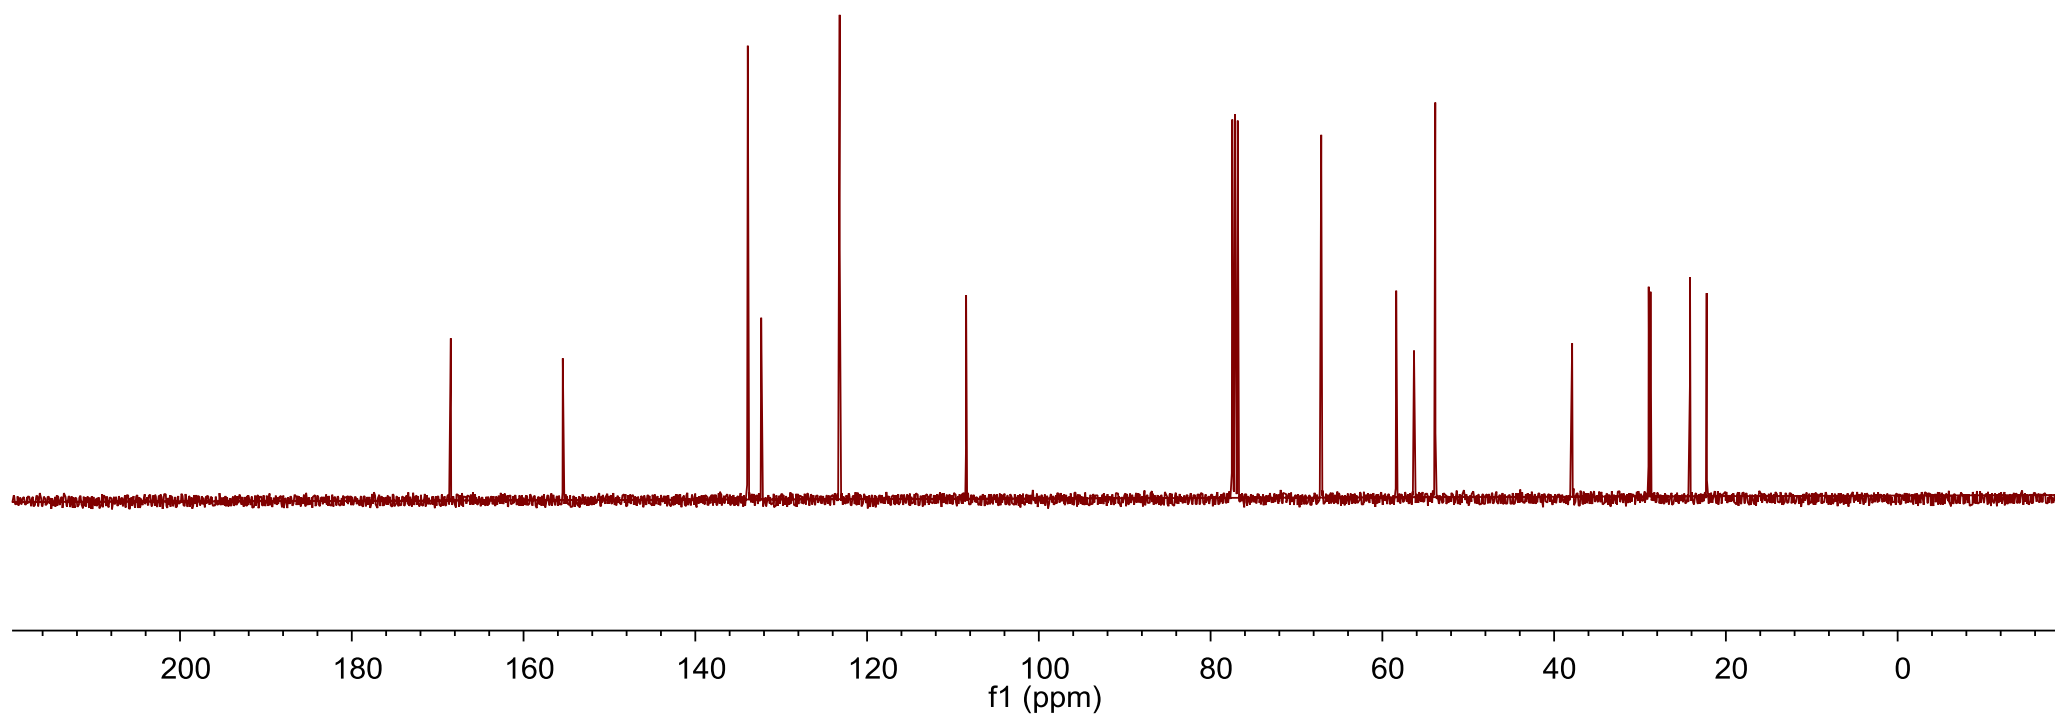

<sup>13</sup>C NMR Spectrum of 12i

CDCl<sub>3</sub>, 400.13 MHz

4.55  
4.53  
4.51

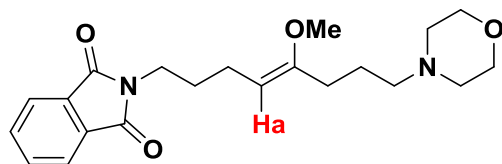

12i

Ha

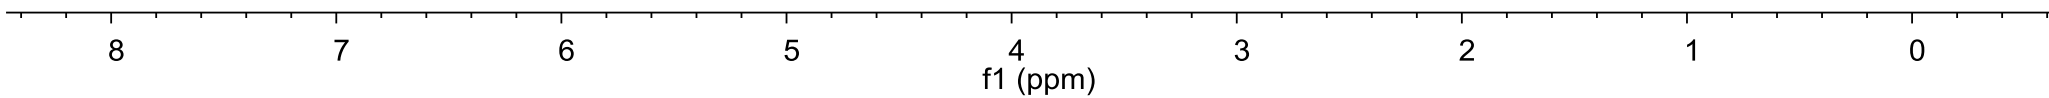

1D-NOE Spectrum of **12i**

CDCl<sub>3</sub>, 400.13 MHz

4.55  
4.54  
4.52

3.53

-0.00

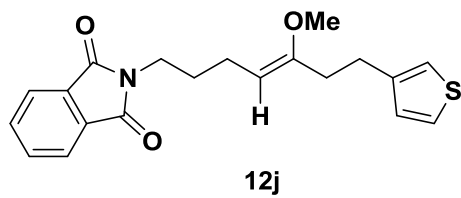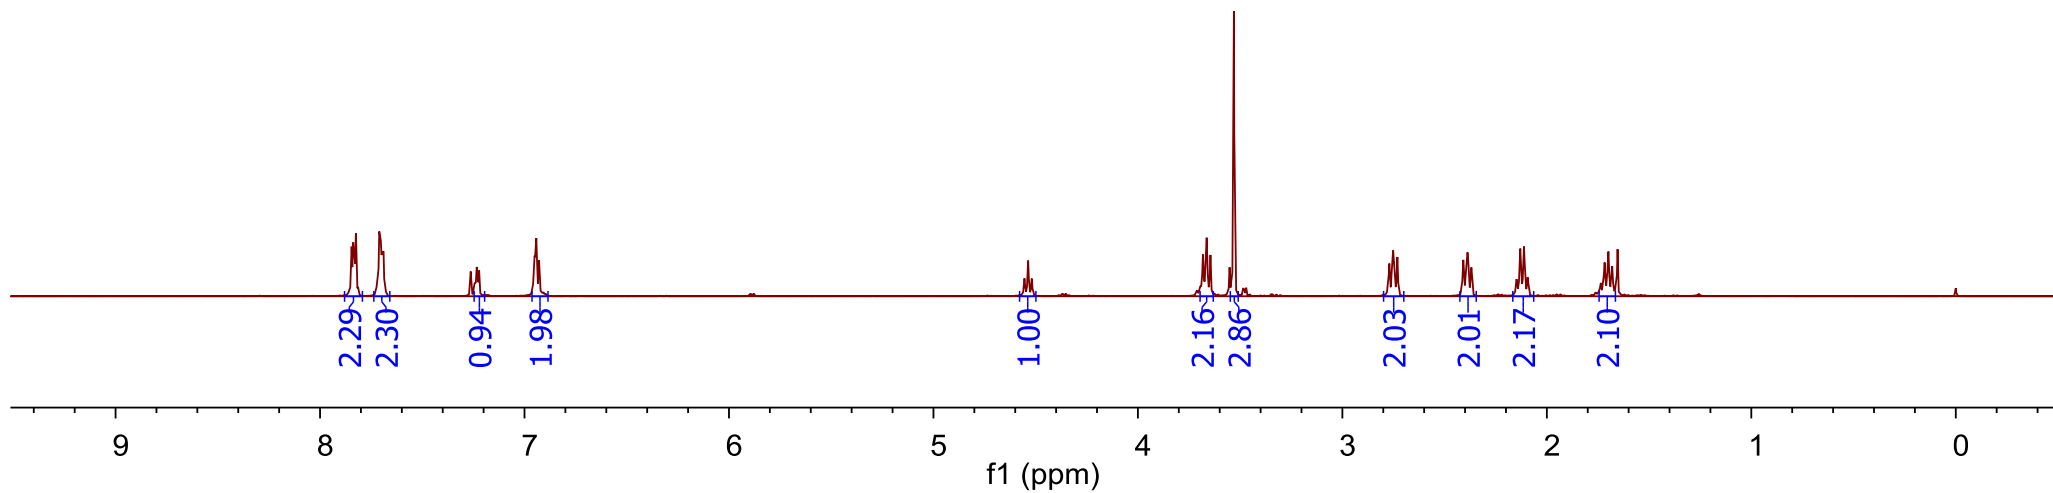

<sup>1</sup>H NMR Spectrum of **12j**

CDCl<sub>3</sub>, 100.61 MHz

— 168.54

— 155.11

— 142.01

— 133.93

— 132.35

— 128.28

— 125.36

— 123.24

— 120.35

— 108.94

— 56.47

— 37.92

— 32.42

— 28.72

— 28.17

— 22.28

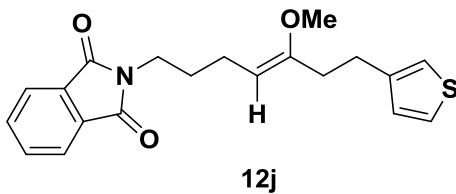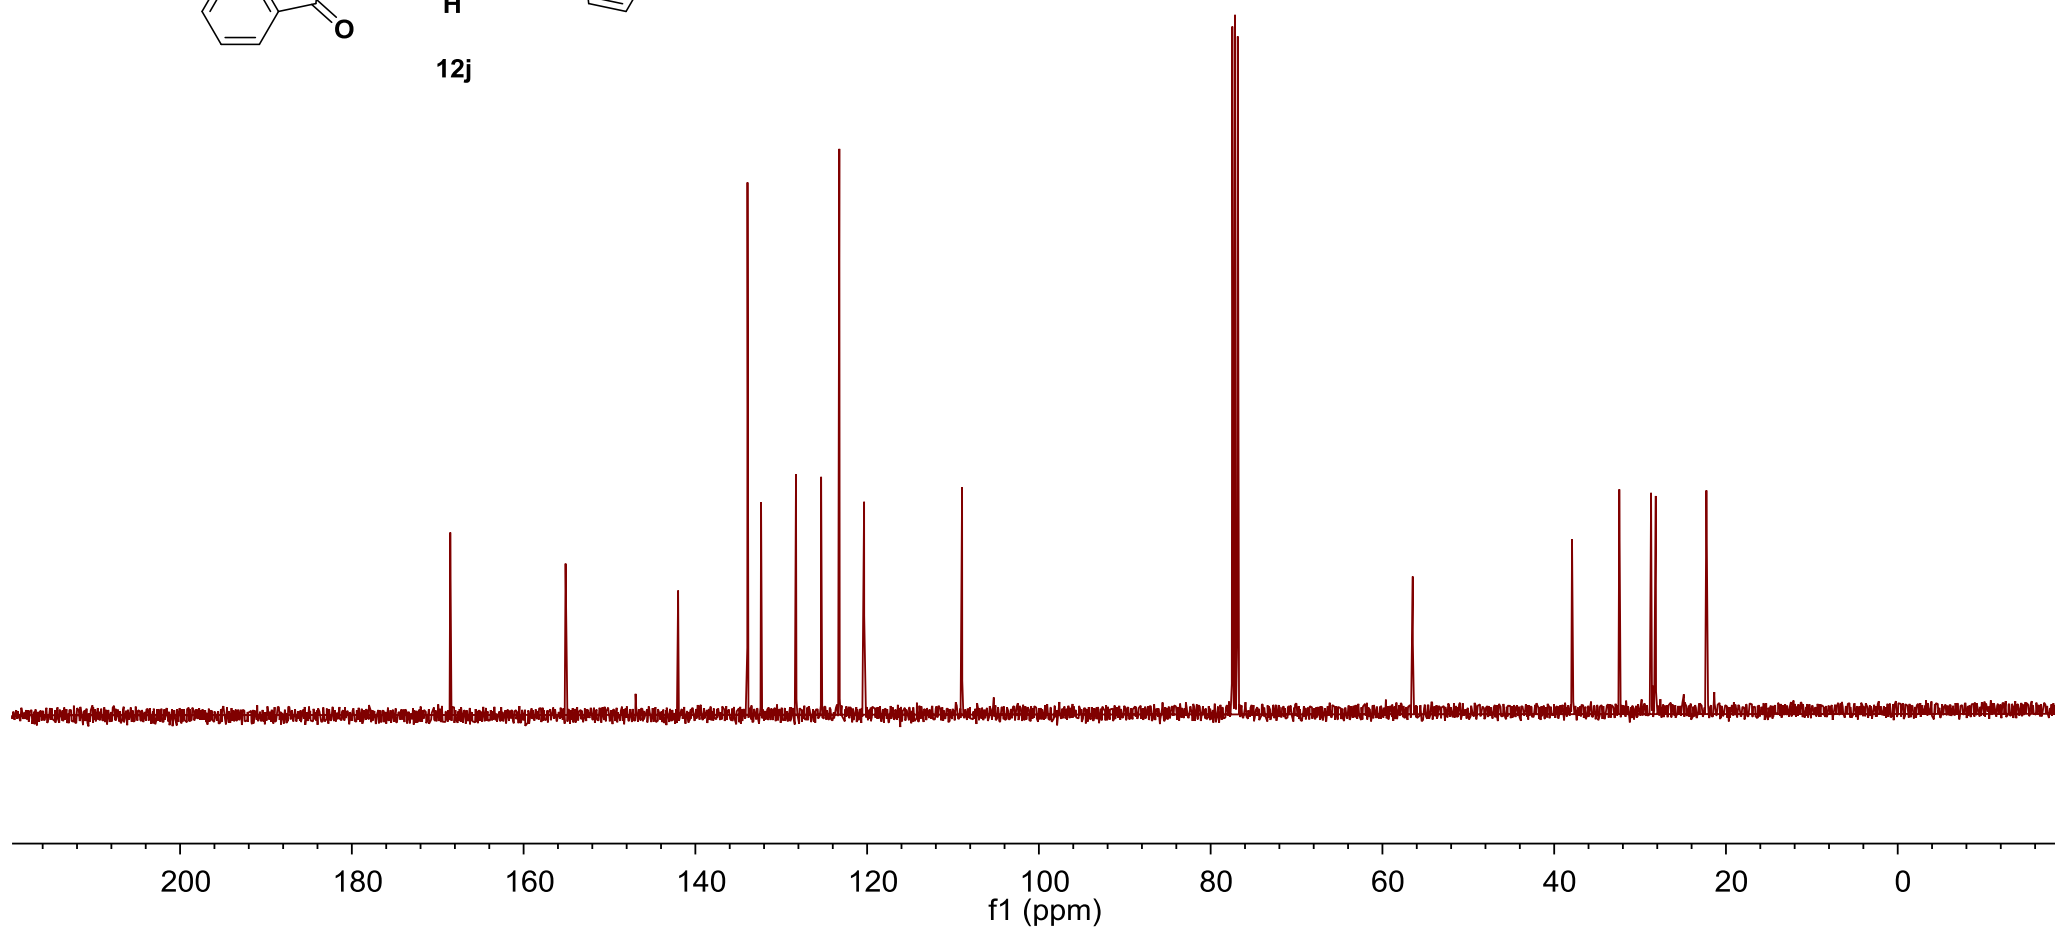

<sup>13</sup>C NMR Spectrum of 12j

CDCl<sub>3</sub>, 400.13 MHz

4.55  
4.54  
4.52

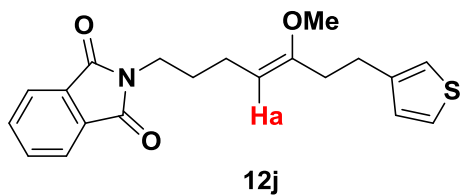

Ha

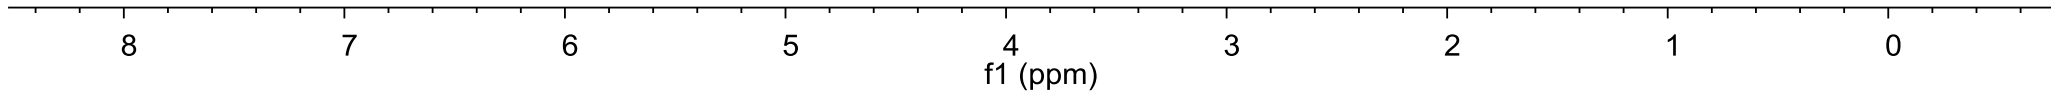

1D-NOE Spectrum of **12j**

CDCl<sub>3</sub>, 400.13 MHz

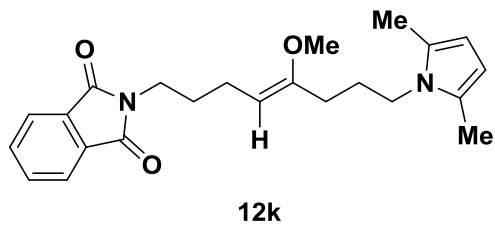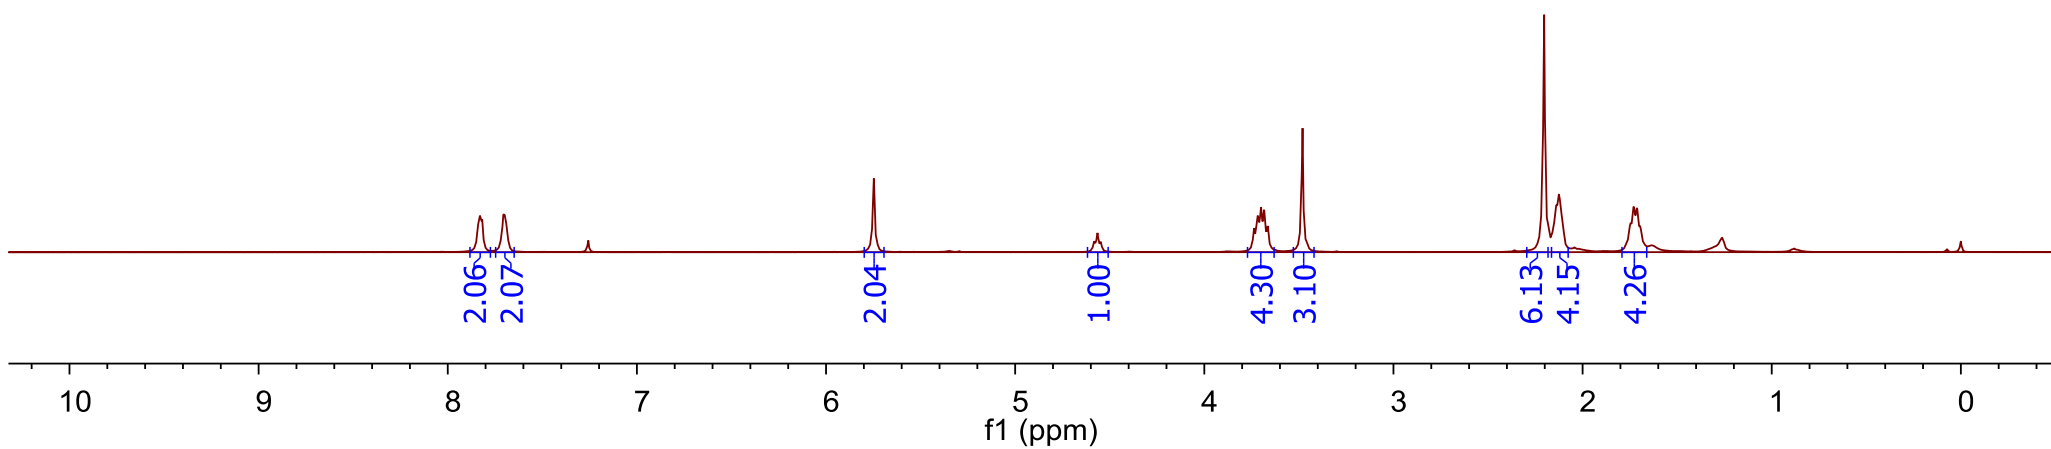

4.58  
4.56  
4.55

3.48

-0.00

<sup>1</sup>H NMR Spectrum of 12k



CDCl<sub>3</sub>, 100.61 MHz

— 168.53

— 154.64

~ 133.95

~ 132.33

~ 127.45

~ 123.25

— 109.09

— 105.20

— 56.41

— 43.01

— 37.90

— 28.76

— 28.57

— 28.16

— 22.29

— 12.60

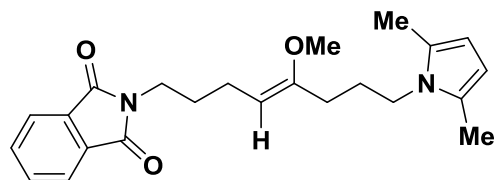

**12k**

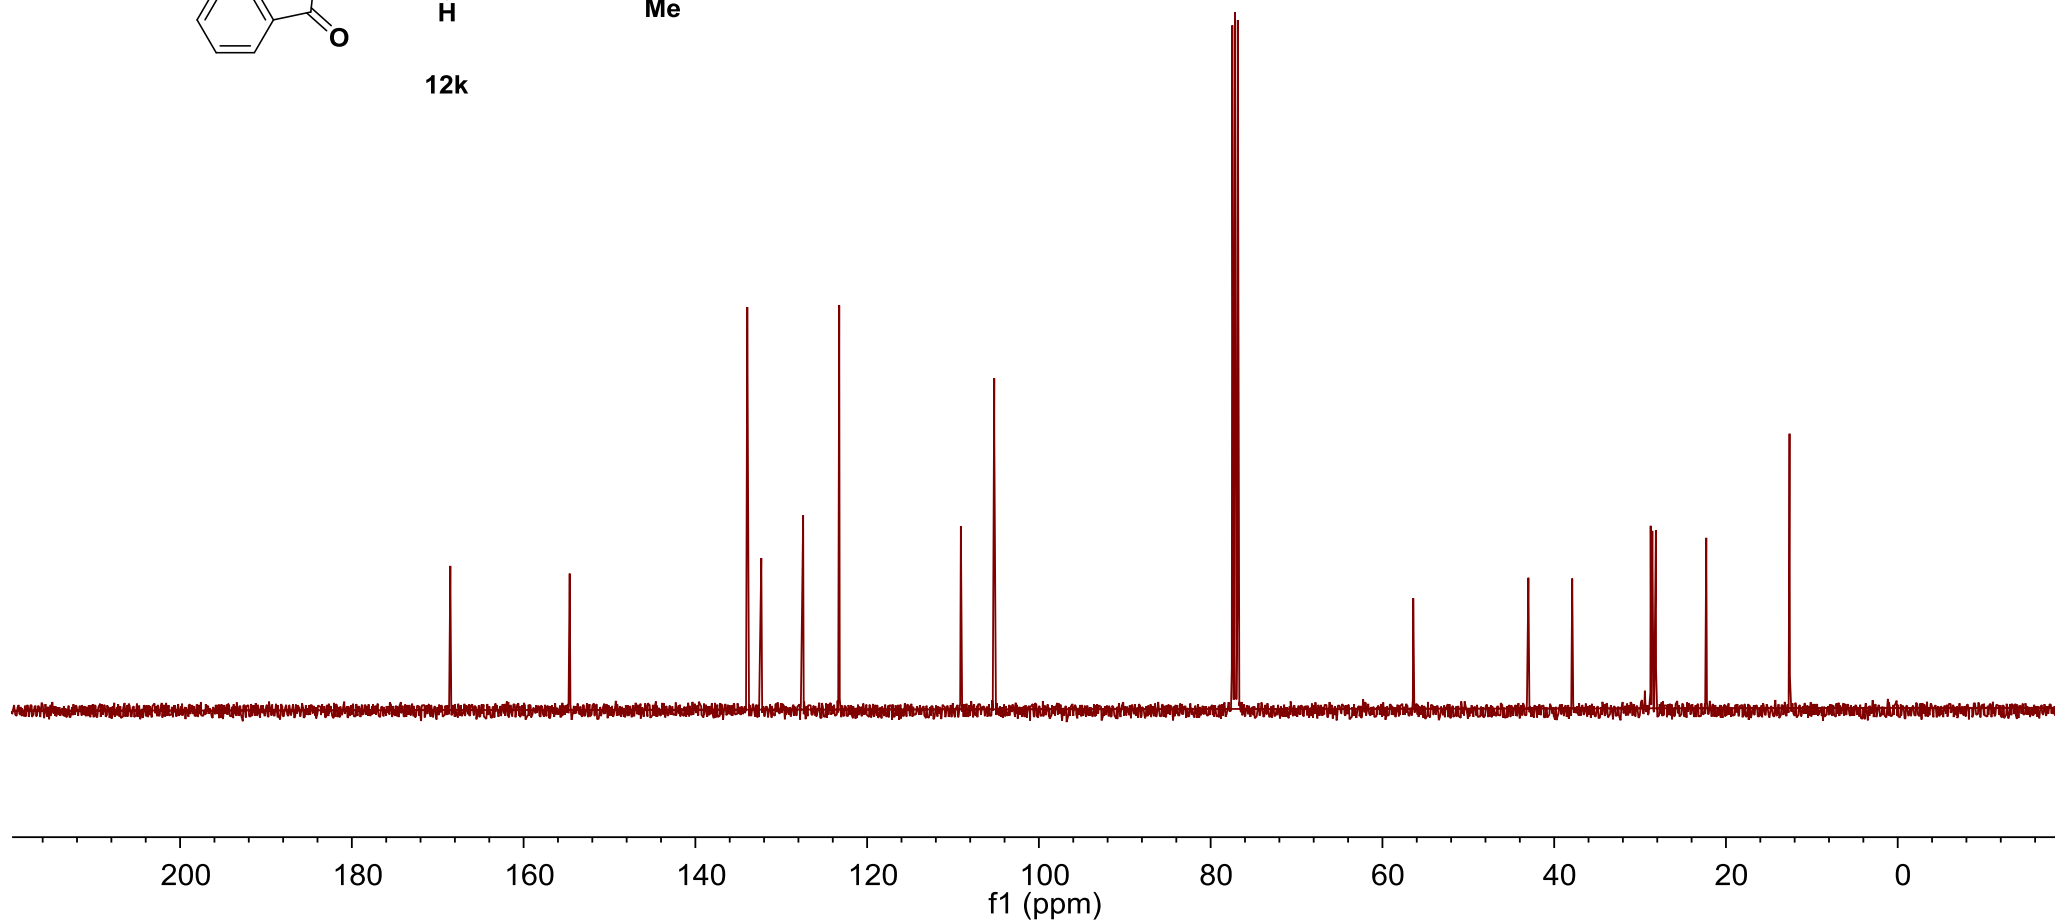

<sup>13</sup>C NMR Spectrum of **12k**

CDCl<sub>3</sub>, 400.13 MHz

4.58  
4.57  
4.55

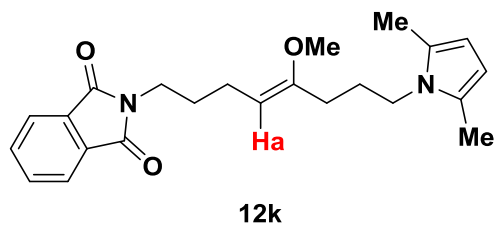

Ha

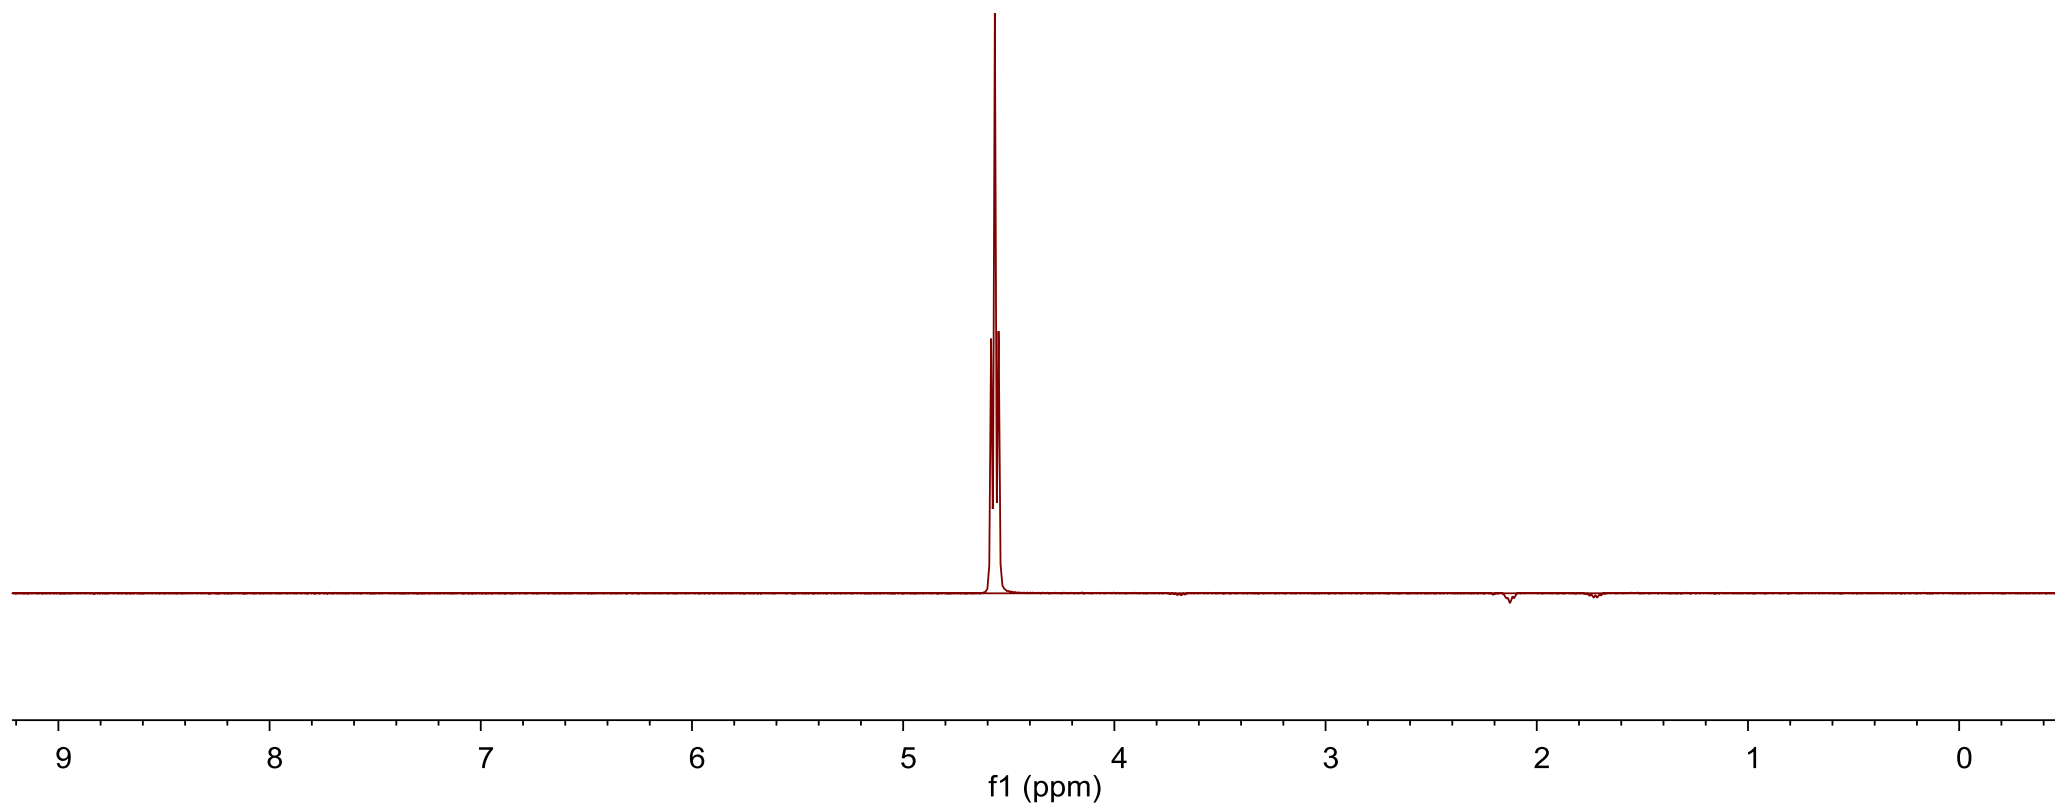

1D-NOE Spectrum of **12k**

CDCl<sub>3</sub>, 400.13 MHz

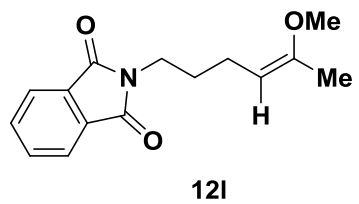

4.43  
4.41  
4.39

3.52

1.79

0.00

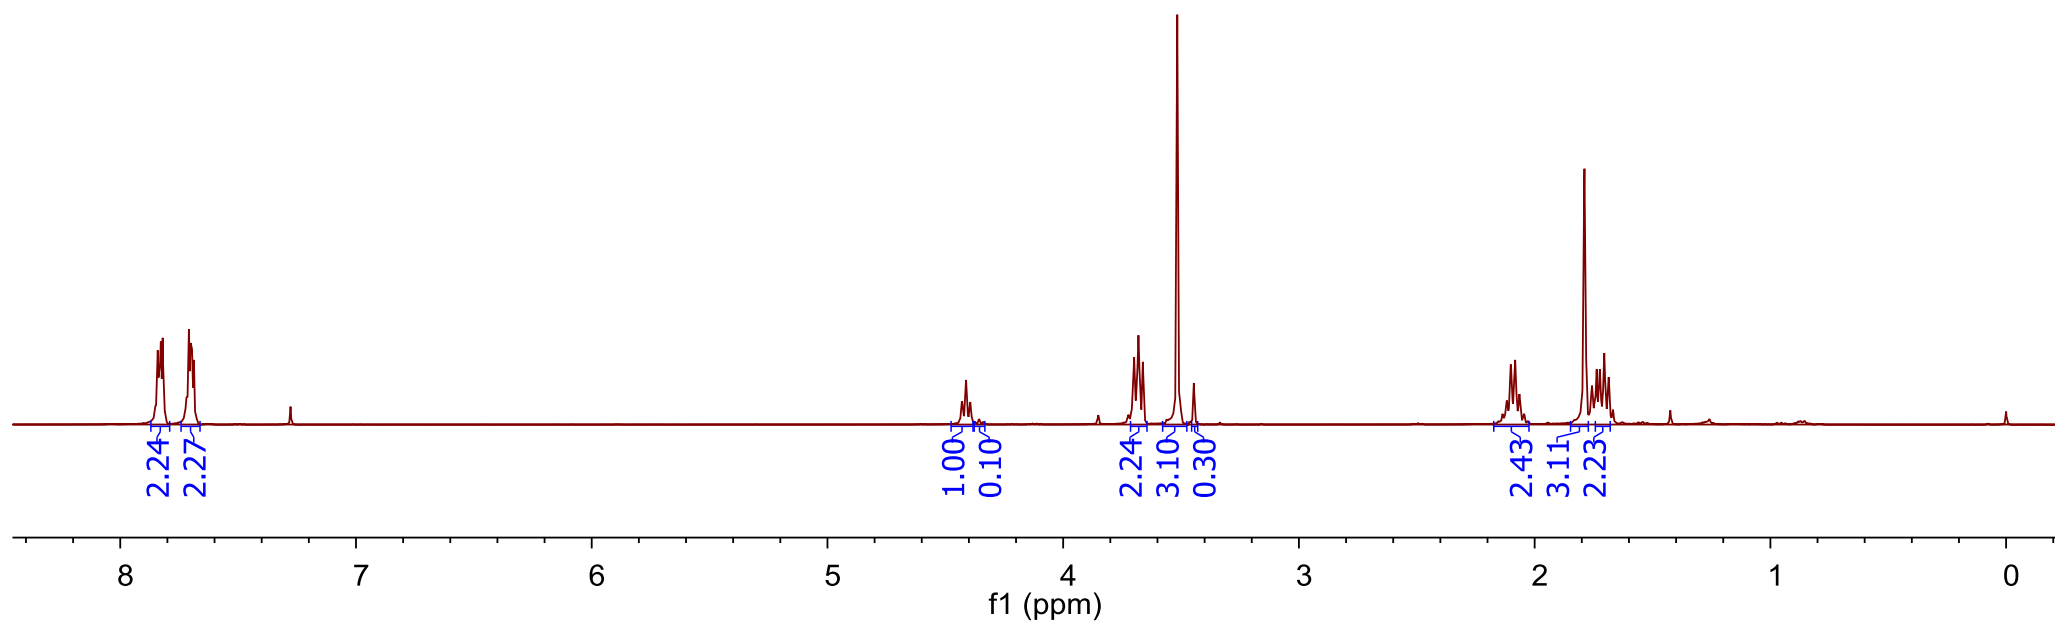

<sup>1</sup>H NMR Spectrum of **12l**

CDCl<sub>3</sub>, 100.61 MHz

— 168.52

— 151.67

∧ 133.87

∧ 132.38

— 123.19

— 106.69

— 55.53

— 37.95

∧ 28.68

∧ 22.11

∧ 17.36

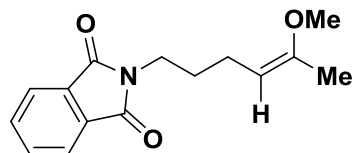

**12l**

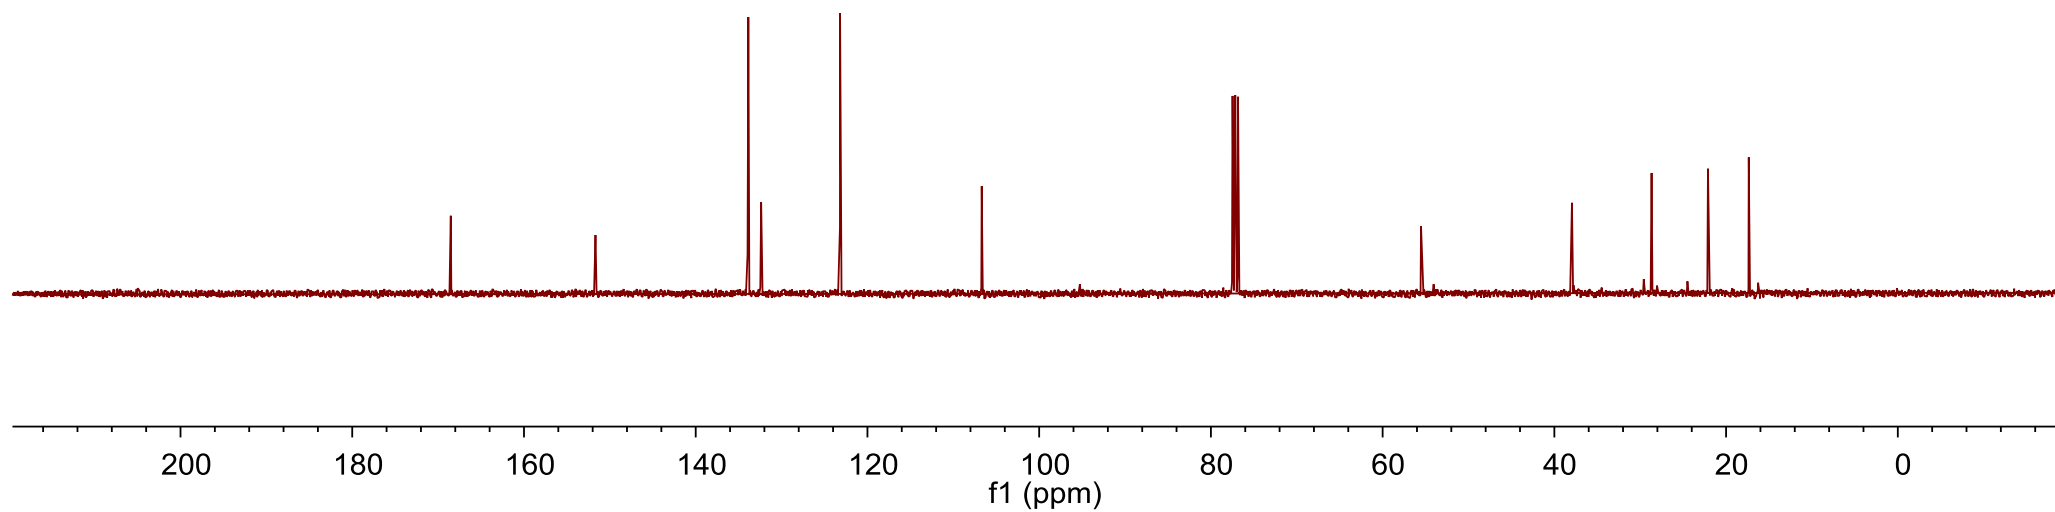

<sup>13</sup>C NMR Spectrum of **12l**

CDCl<sub>3</sub>, 400.13 MHz

4.43  
4.41  
4.39

— 1.79

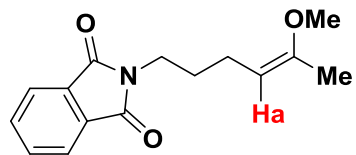

**12l**

Ha

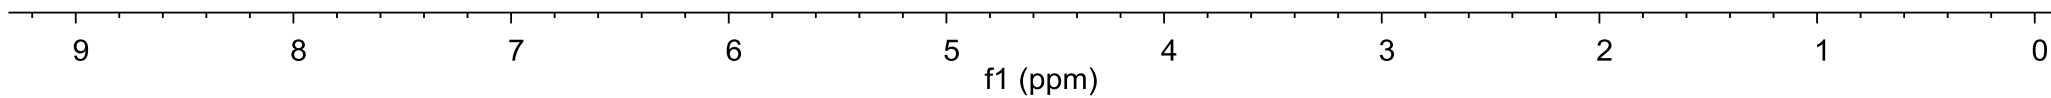

1D-NOE Spectrum of **12l**

CDCl<sub>3</sub>, 400.13 MHz

4.66  
4.64  
4.62

3.52

0.00

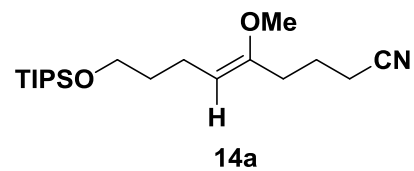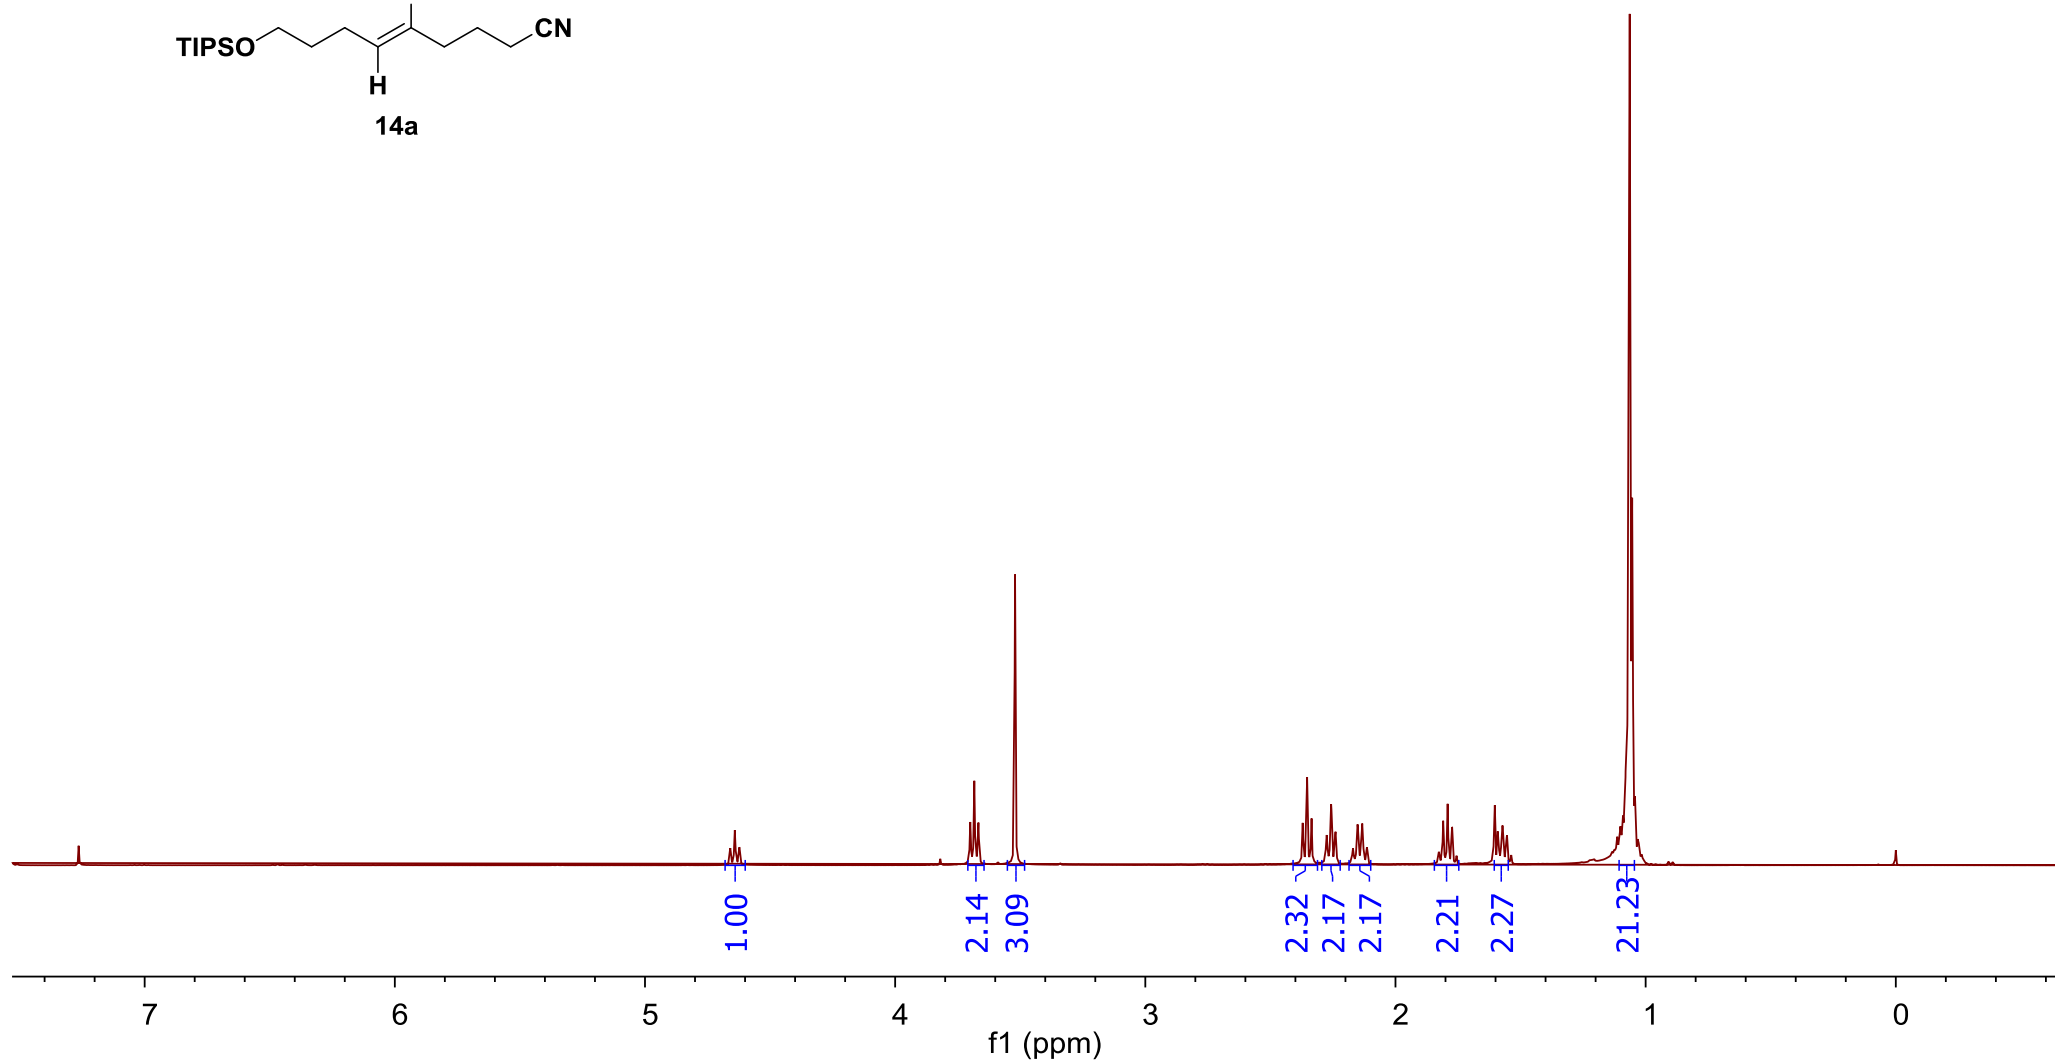

<sup>1</sup>H NMR Spectrum of **14a**

CDCl<sub>3</sub>, 100.61 MHz

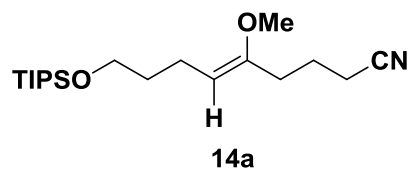

— 152.84

— 119.69

— 112.61

— 63.19

— 56.99

— 33.43

— 30.33

— 22.95

— 21.45

— 18.16

— 16.34

— 12.17

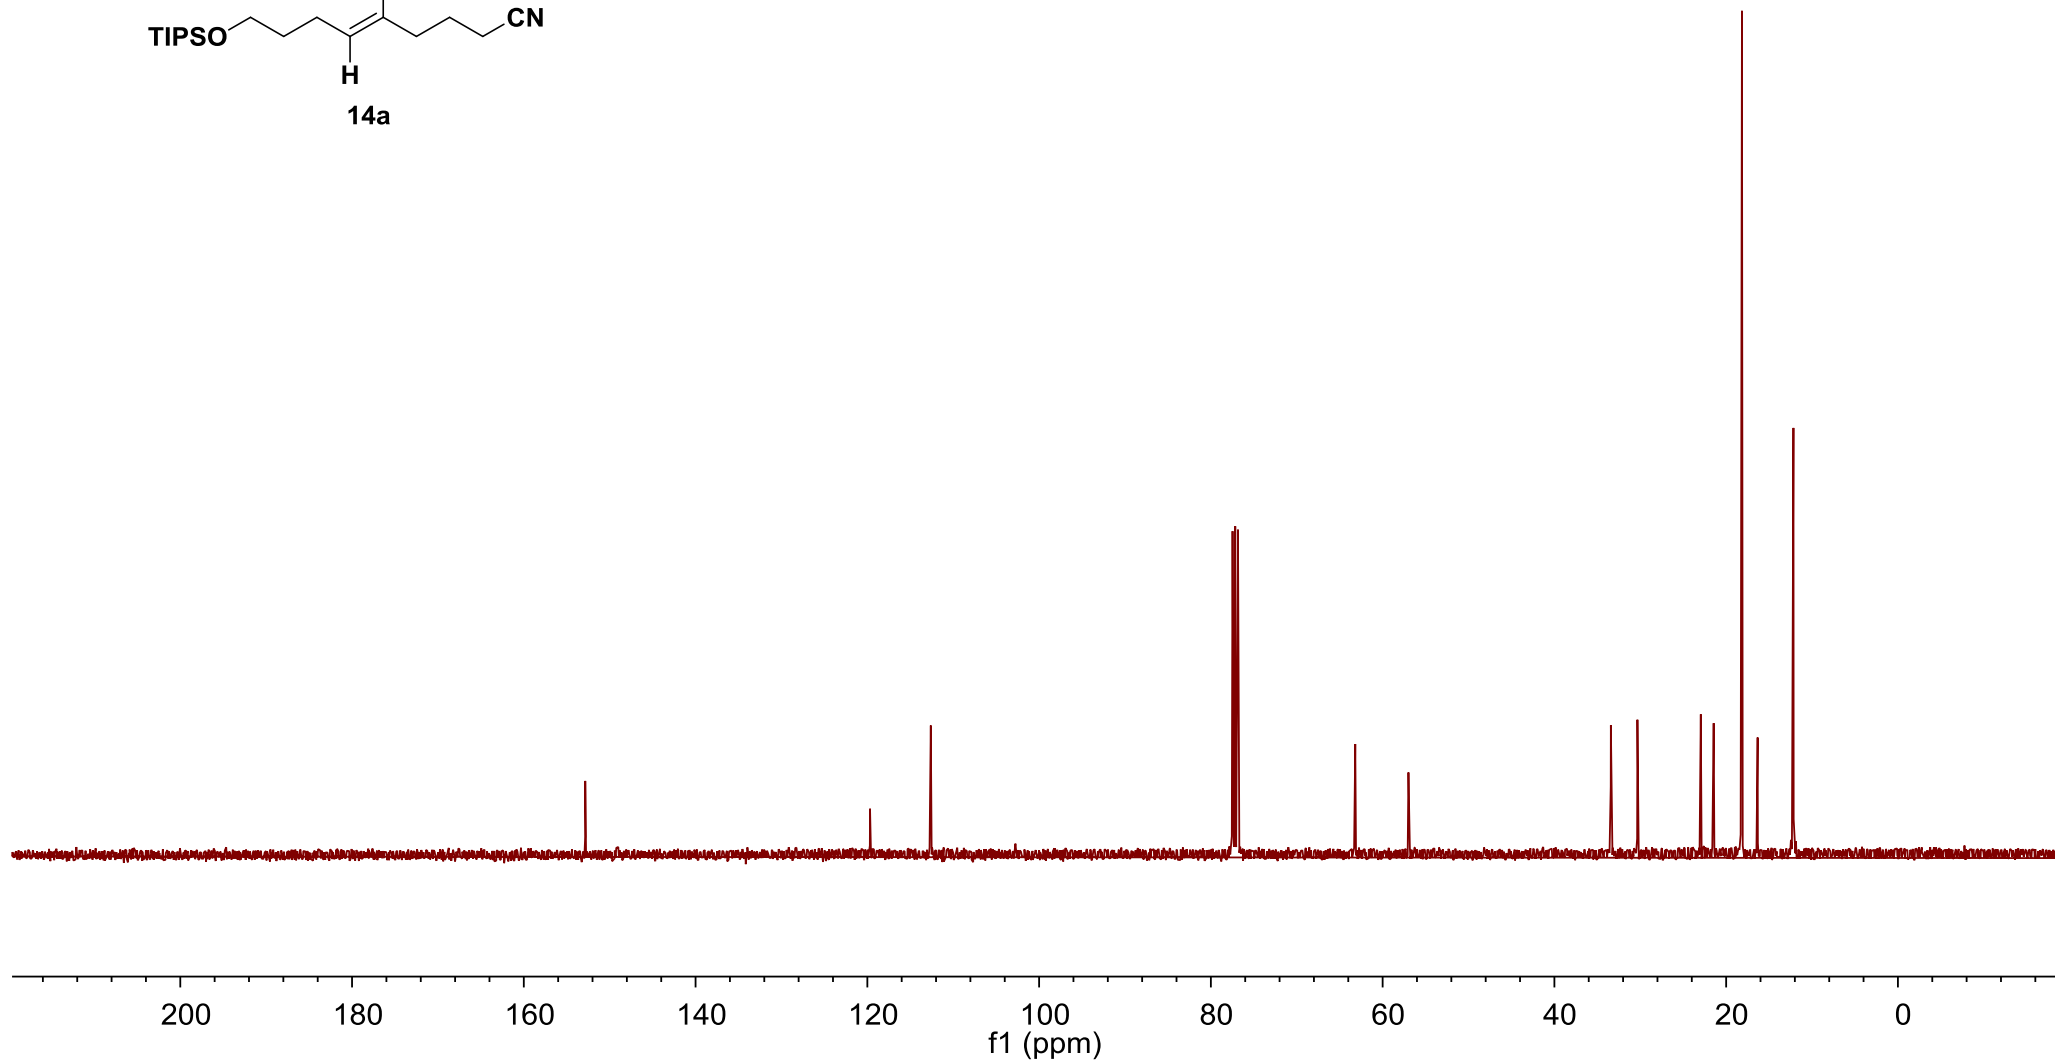

CDCl<sub>3</sub>, 400.13 MHz

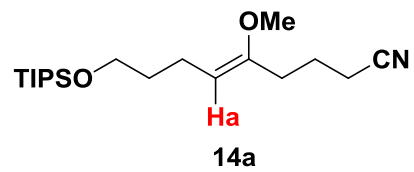

4.66  
4.64  
4.62

Ha

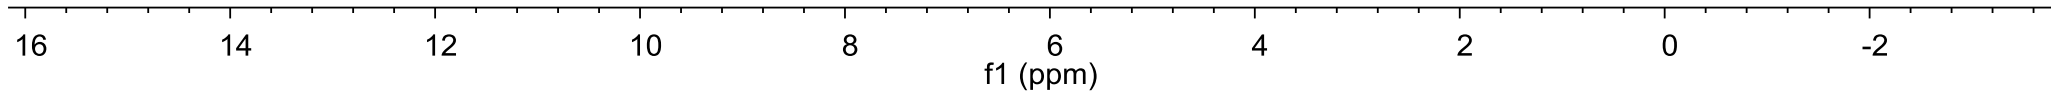

1D-NOE Spectrum of **14a**



CDCl<sub>3</sub>, 400.13 MHz

4.63  
4.61  
4.60

3.51

0.00

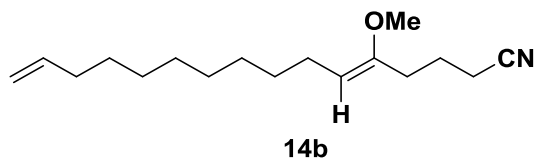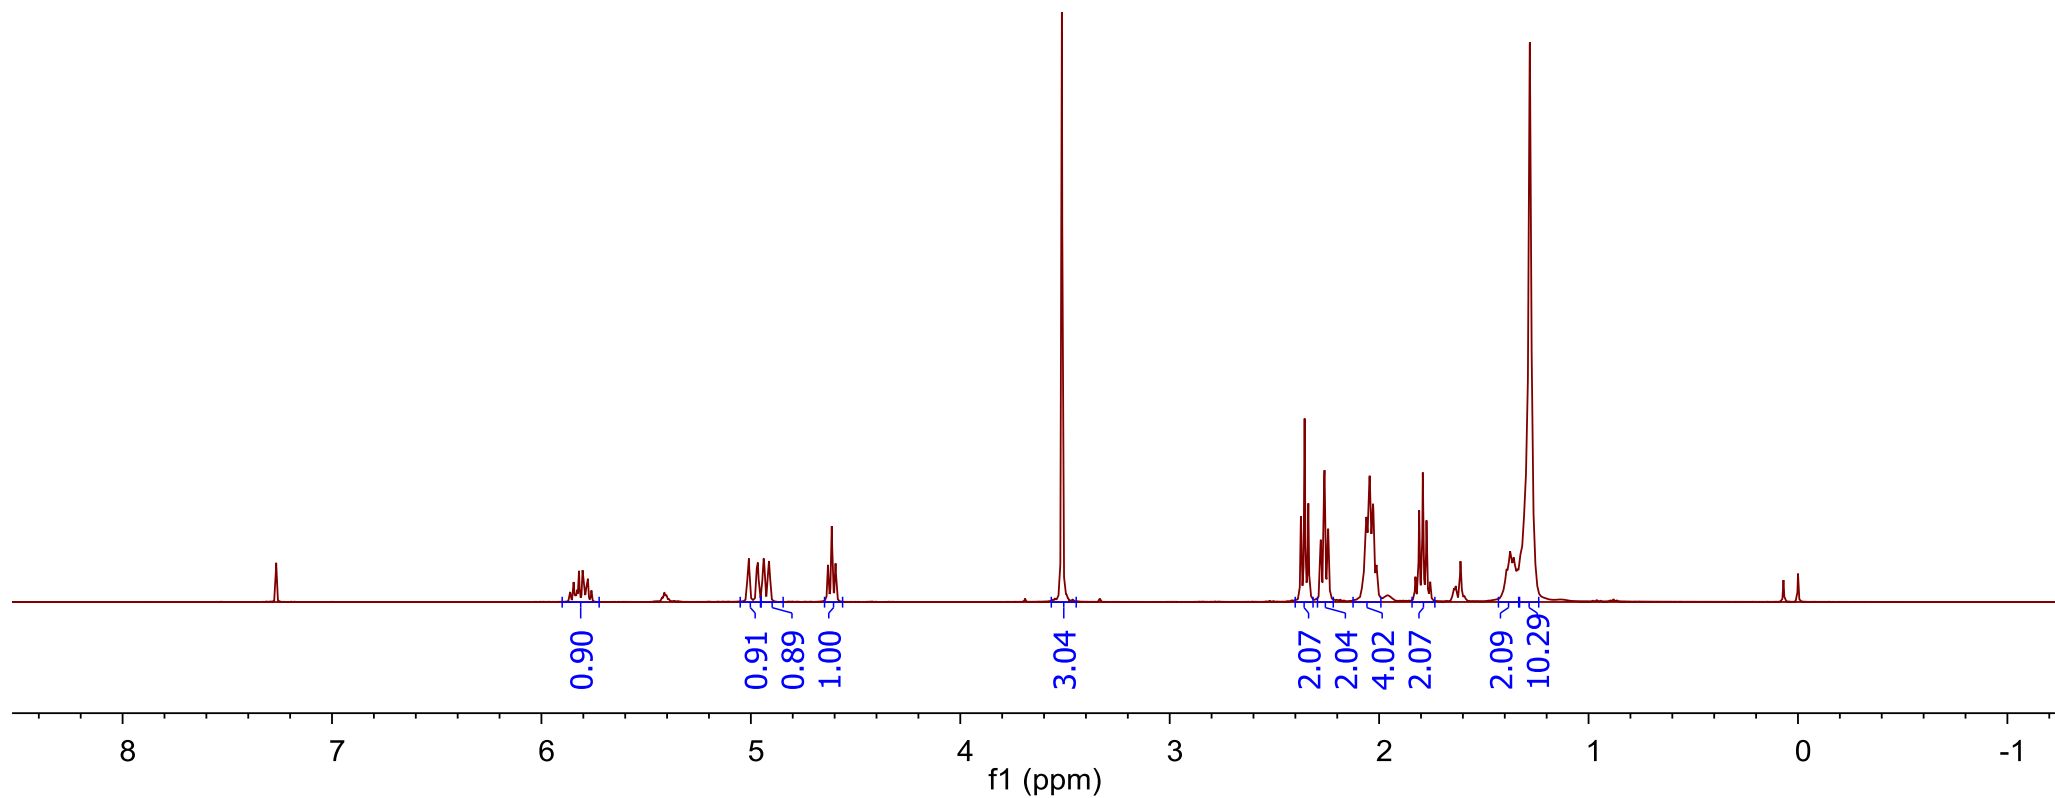

<sup>1</sup>H NMR Spectrum of **14b**

CDCl<sub>3</sub>, 100.61 MHz

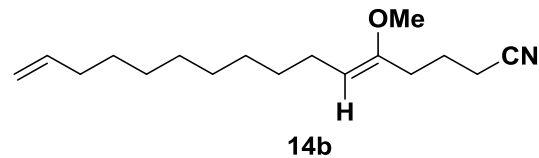

— 152.45

— 139.36

— 119.72

— 114.21

— 113.28

— 56.97

33.93

30.22

30.02

29.58

29.55

29.46

29.25

29.05

24.94

22.89

16.29

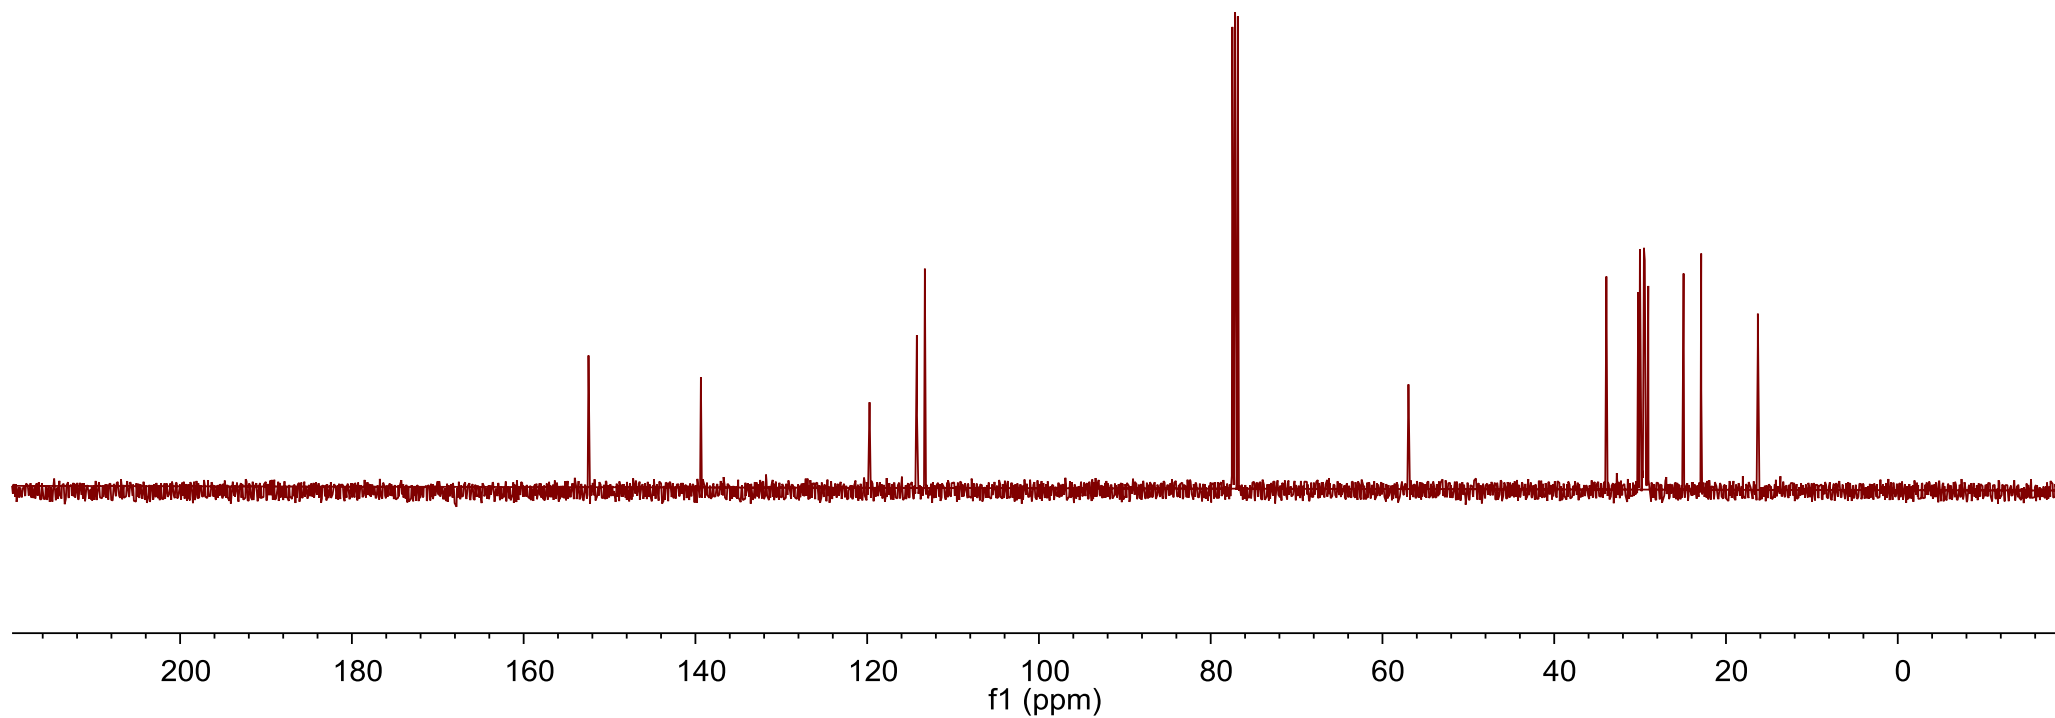

<sup>13</sup>C NMR Spectrum of **14b**

CDCl<sub>3</sub>, 400.13 MHz

4.63  
4.61  
4.59

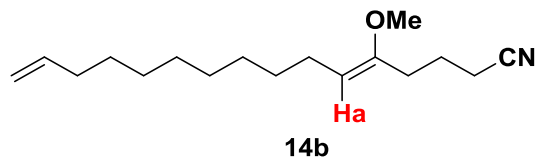

Ha

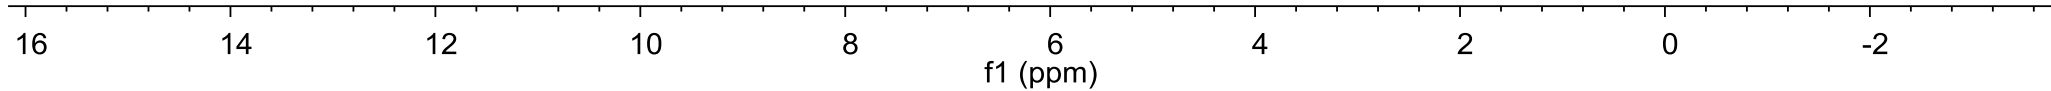

1D-NOE Spectrum of **14b**

CDCl<sub>3</sub>, 400.13 MHz

4.64  
4.62  
4.60

3.50

-0.00

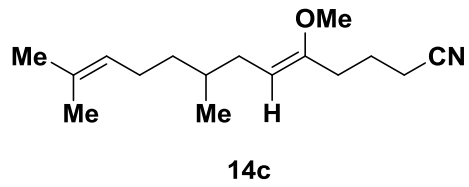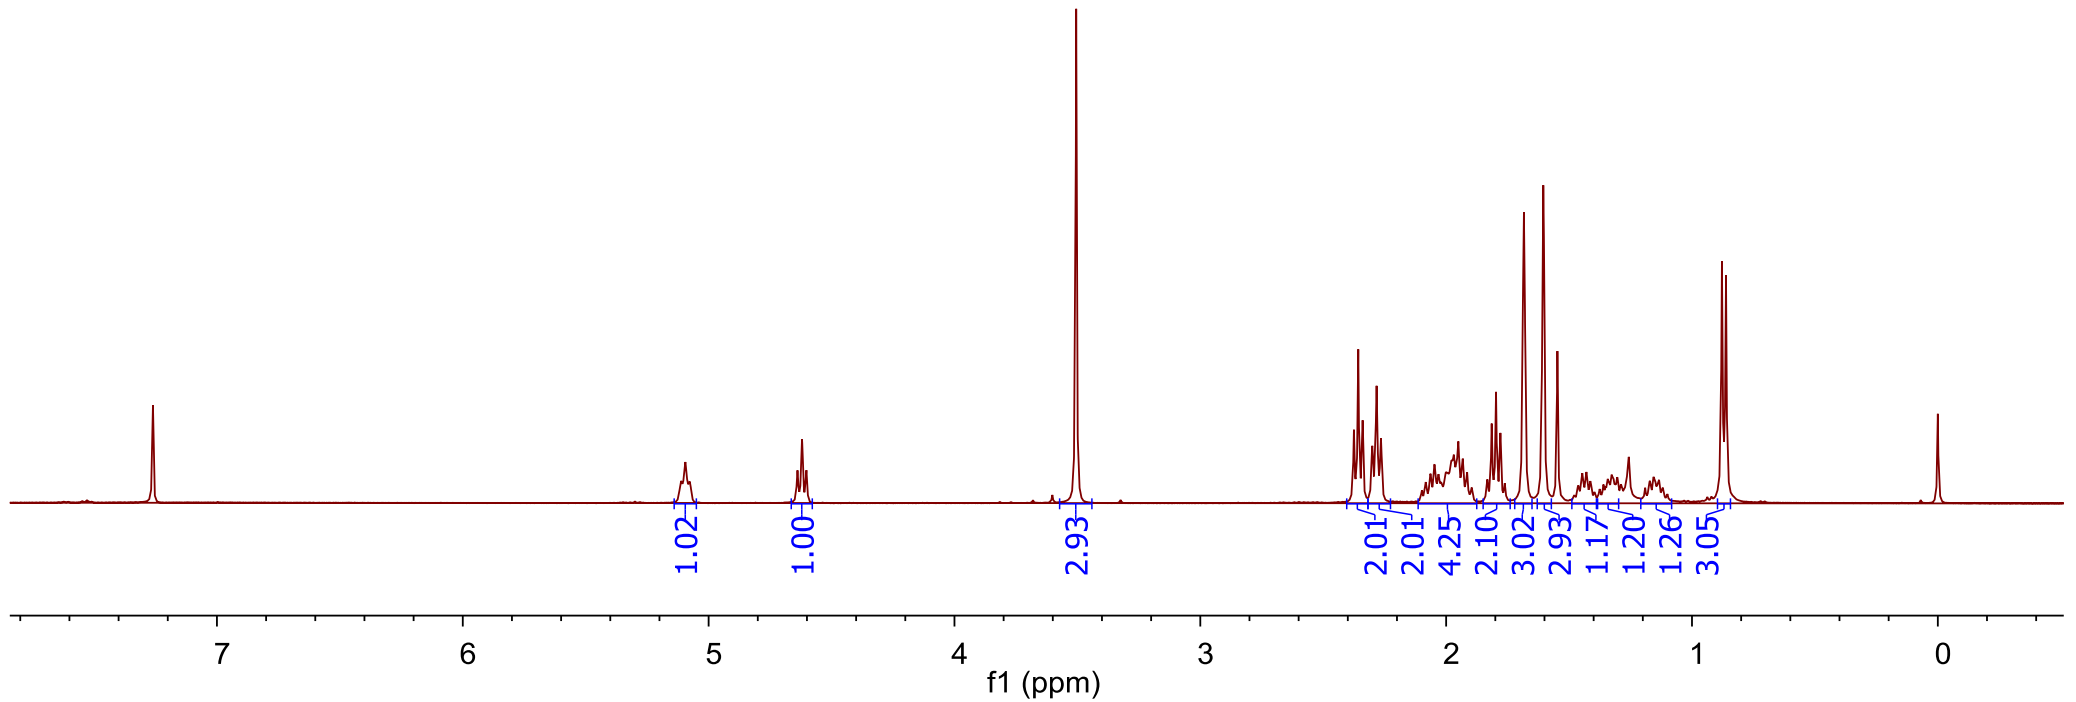

<sup>1</sup>H NMR Spectrum of **14c**

CDCl<sub>3</sub>, 100.61 MHz

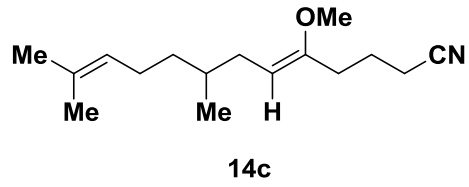

— 153.03

131.25  
125.05  
119.72  
111.70

— 56.80

36.90  
33.11  
32.03  
30.23  
25.86  
25.78  
22.97  
19.70  
17.78  
16.34

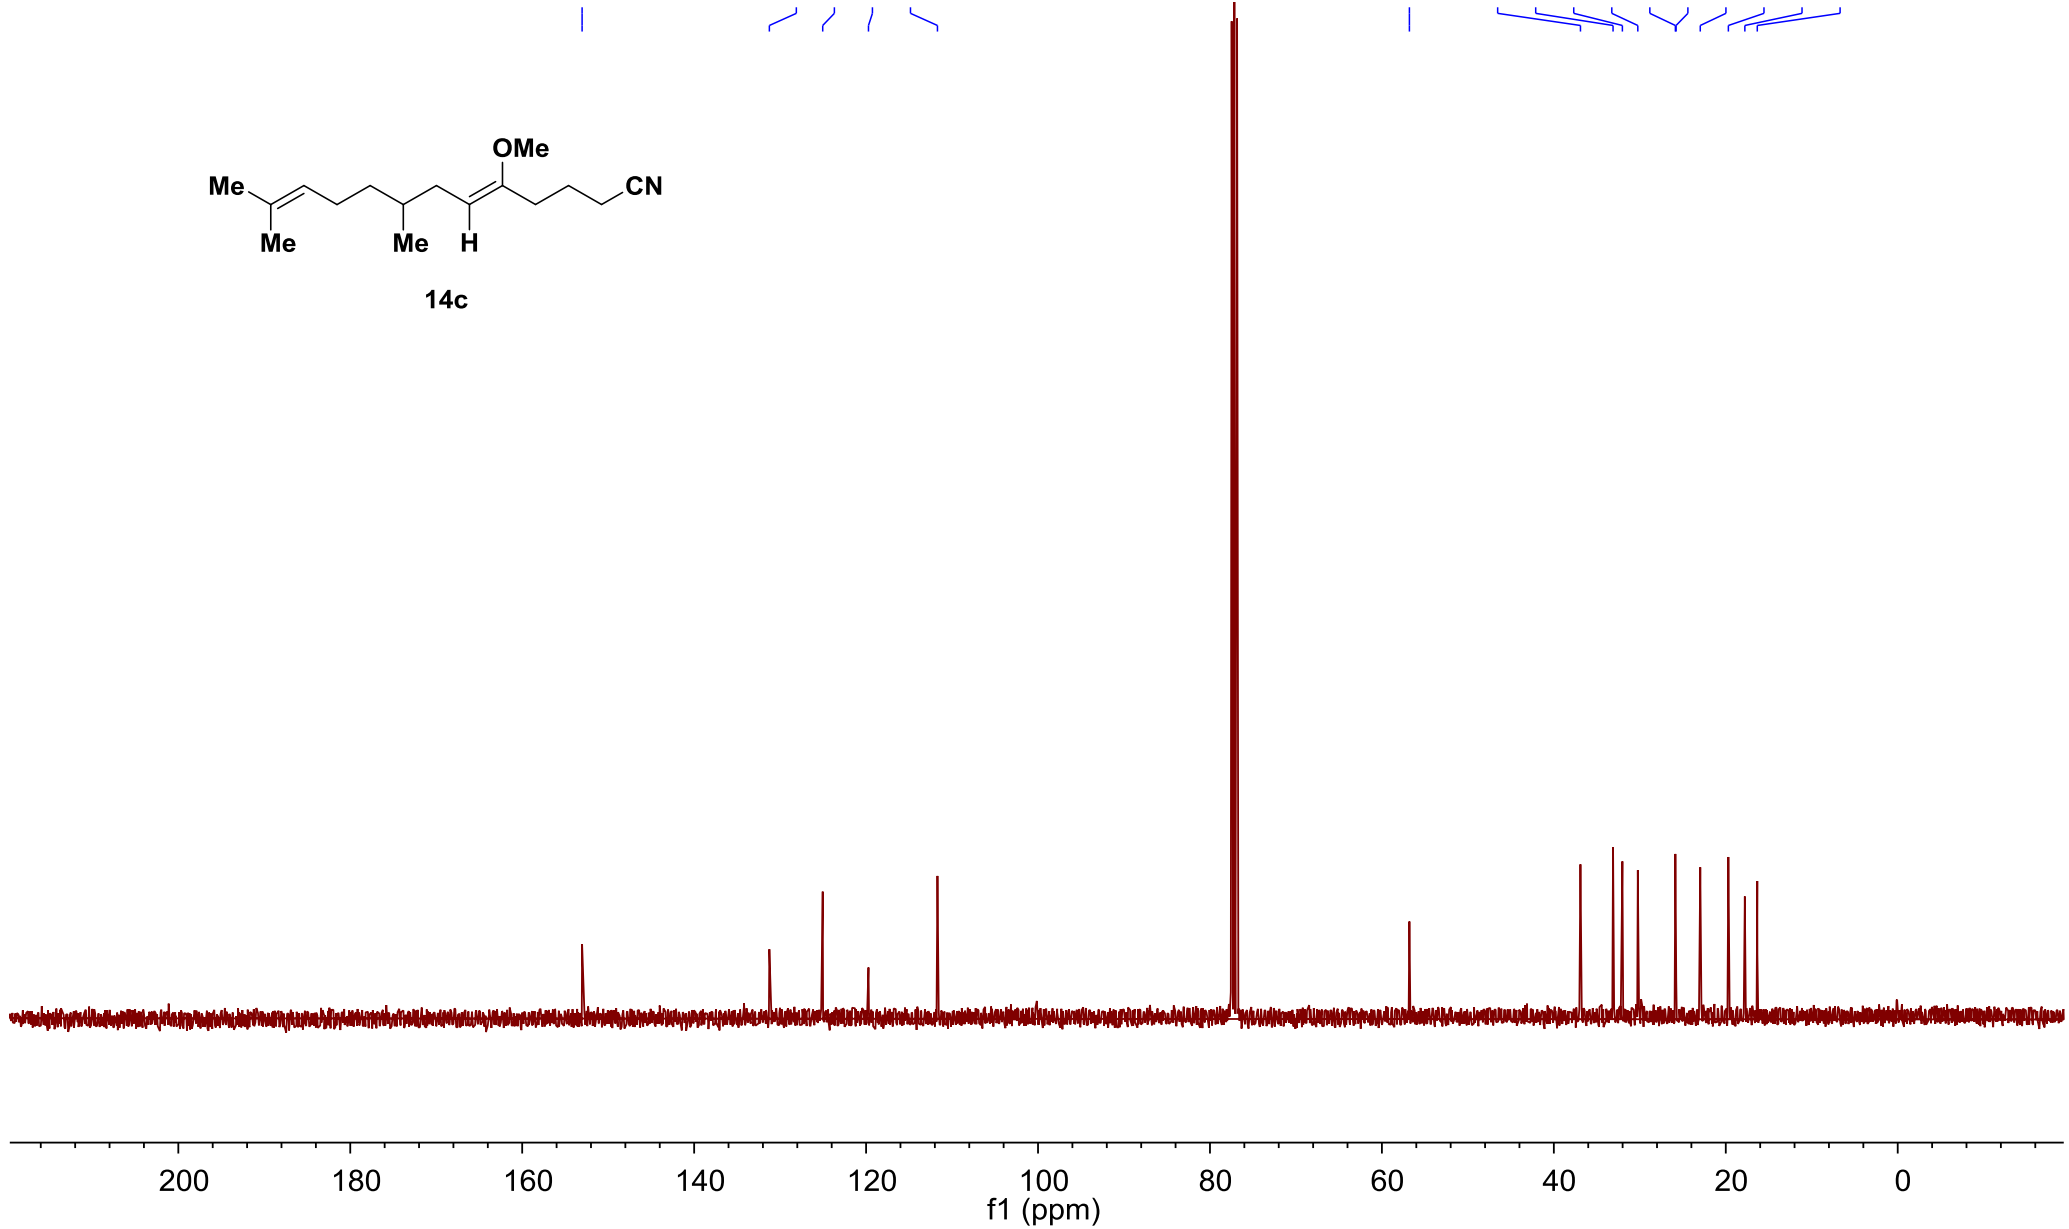

CDCl<sub>3</sub>, 400.13 MHz

4.64  
4.62  
4.60

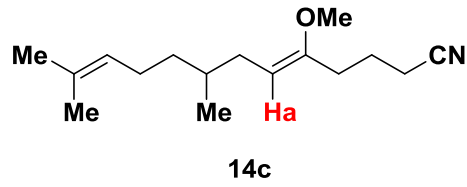

Ha

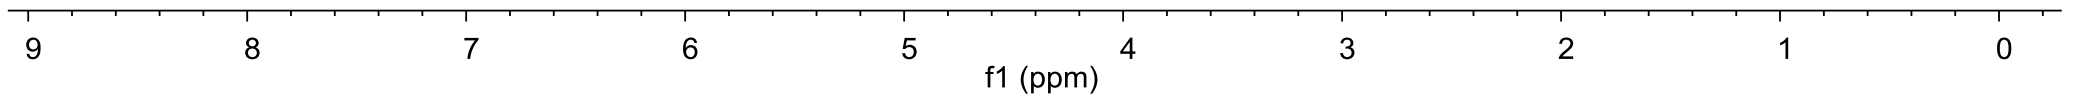

1D-NOE Spectrum of **14c**

CDCl<sub>3</sub>, 400.13 MHz

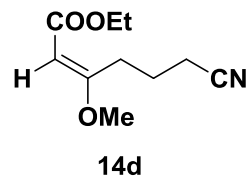

— 5.06

— 3.65

— -0.00

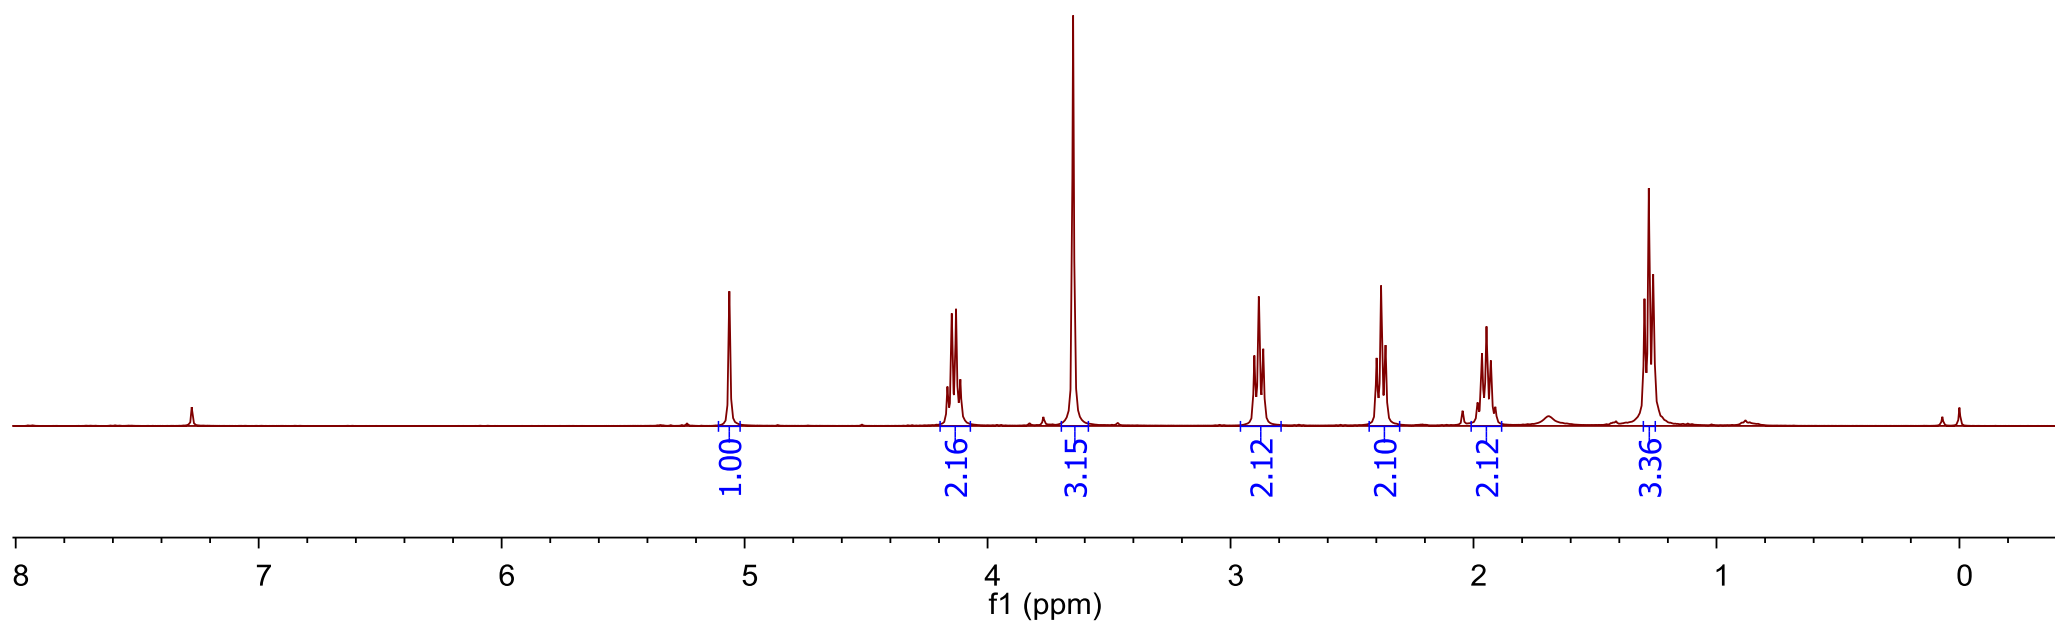

<sup>1</sup>H NMR Spectrum of 14d

CDCl<sub>3</sub>, 100.61 MHz

— 173.90  
— 167.50

— 119.65

— 91.98

— 59.71  
— 55.69

— 30.92  
— 23.49  
— 16.78  
— 14.47

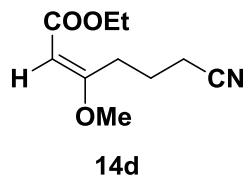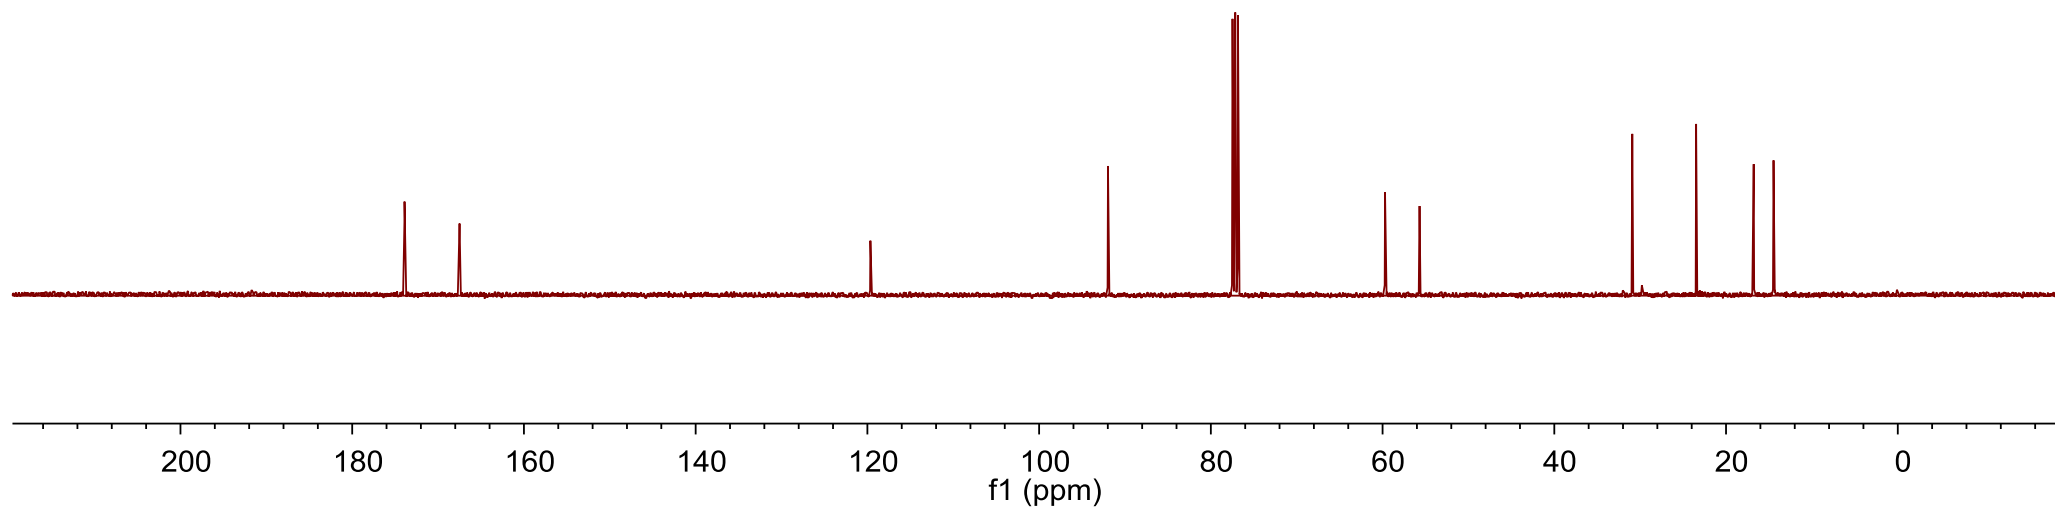

<sup>13</sup>C NMR Spectrum of **14d**



CDCl<sub>3</sub>, 400.13 MHz

— 5.06

— 3.65

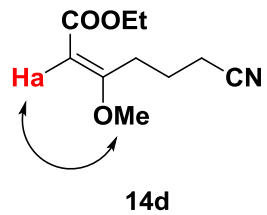

**Ha**

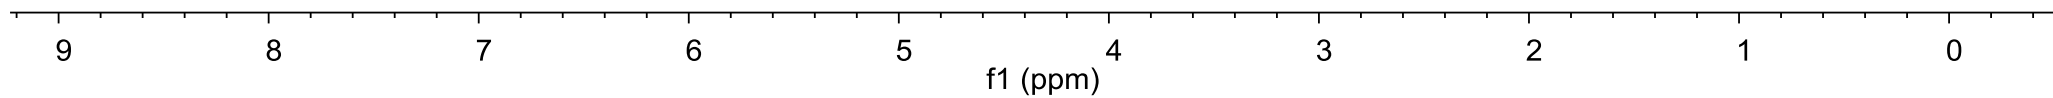

1D-NOE Spectrum of **14d**

CDCl<sub>3</sub>, 400.13 MHz

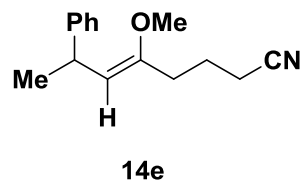

4.82  
4.79

3.51

-0.00

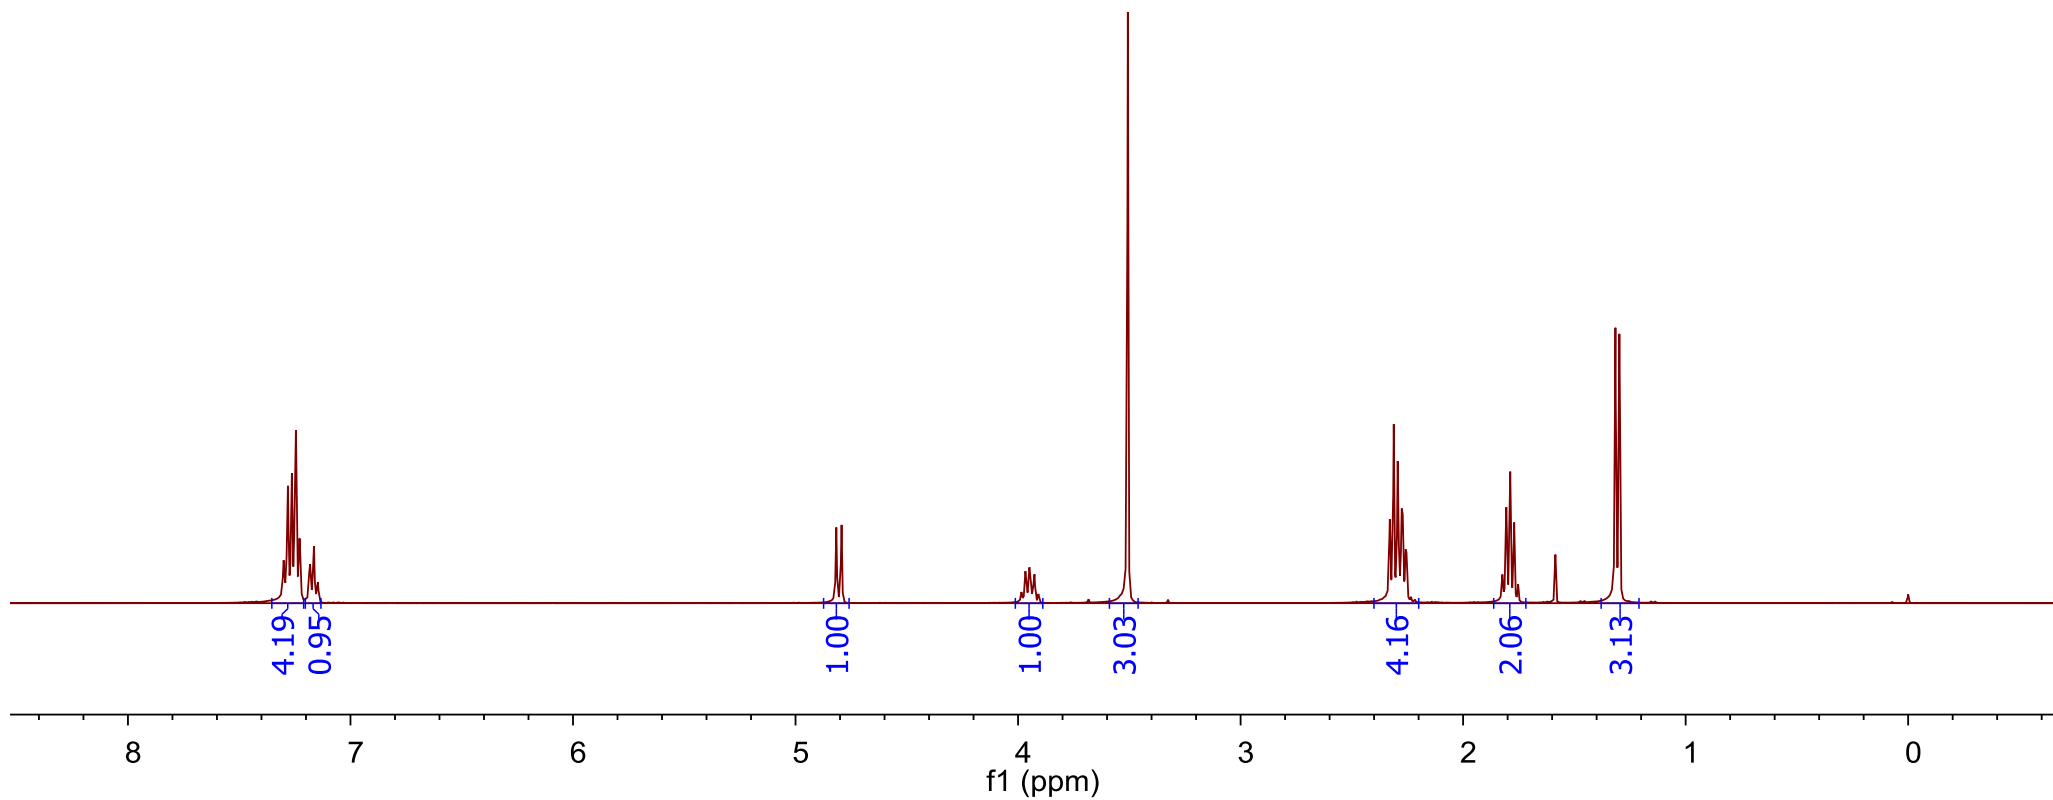

<sup>1</sup>H NMR Spectrum of **14e**

CDCl<sub>3</sub>, 100.61 MHz

— 151.32  
— 147.11

— 128.49  
— 126.85  
— 125.94  
— 119.62  
— 118.33

— 56.69

— 35.22  
— 29.77  
— 22.83  
— 22.58  
— 16.23

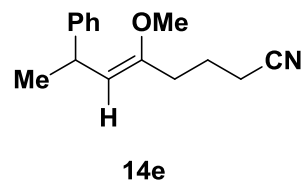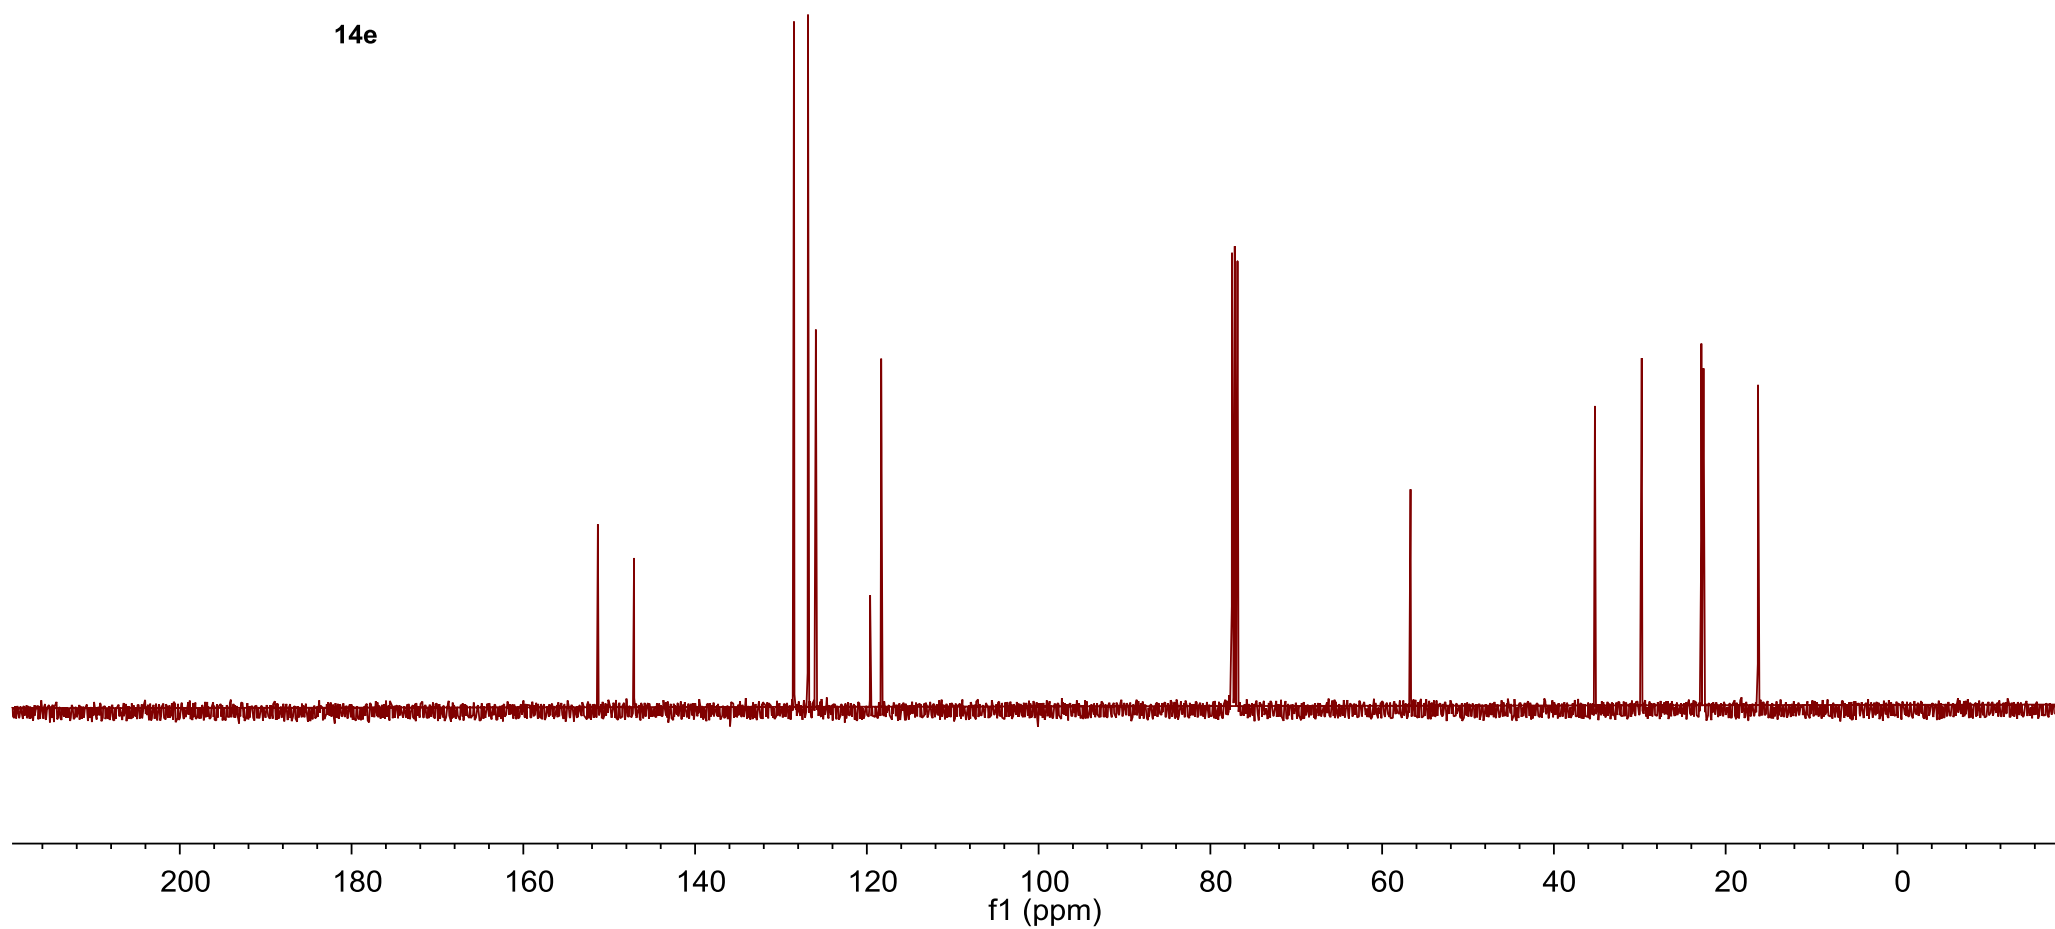

<sup>13</sup>C NMR Spectrum of **14e**

CDCl<sub>3</sub>, 400.13 MHz

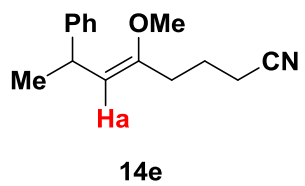

4.83  
4.80

Ha

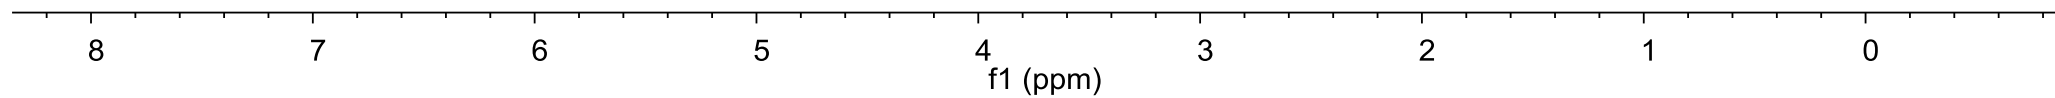

1D-NOE Spectrum of **14e**

CDCl<sub>3</sub>, 400.13 MHz

— 4.56

— 3.47

— 0.00

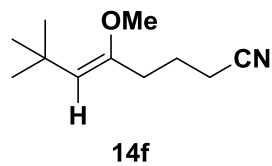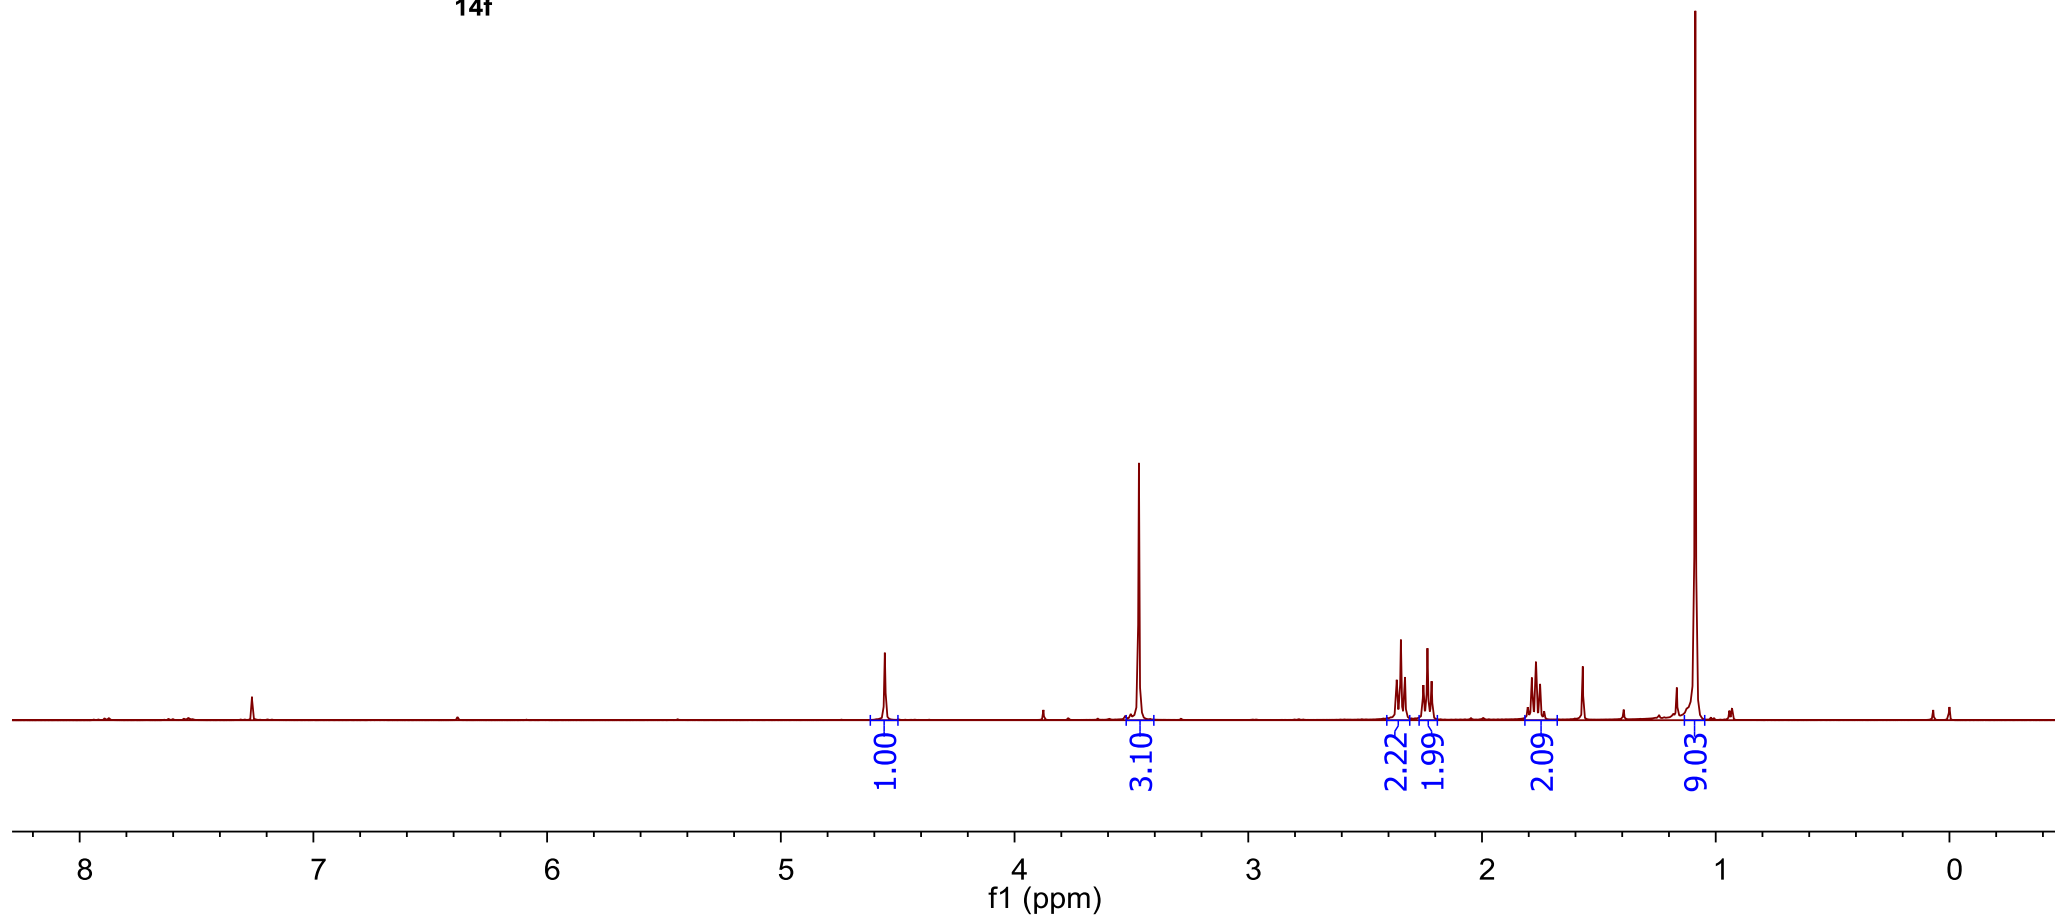

<sup>1</sup>H NMR Spectrum of **14f**

CDCl<sub>3</sub>, 100.61 MHz

— 151.03

~ 122.98  
~ 119.76

— 55.76

{ 31.61  
30.79  
29.97  
22.92  
16.08

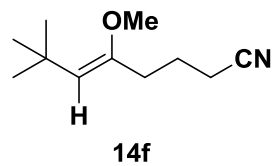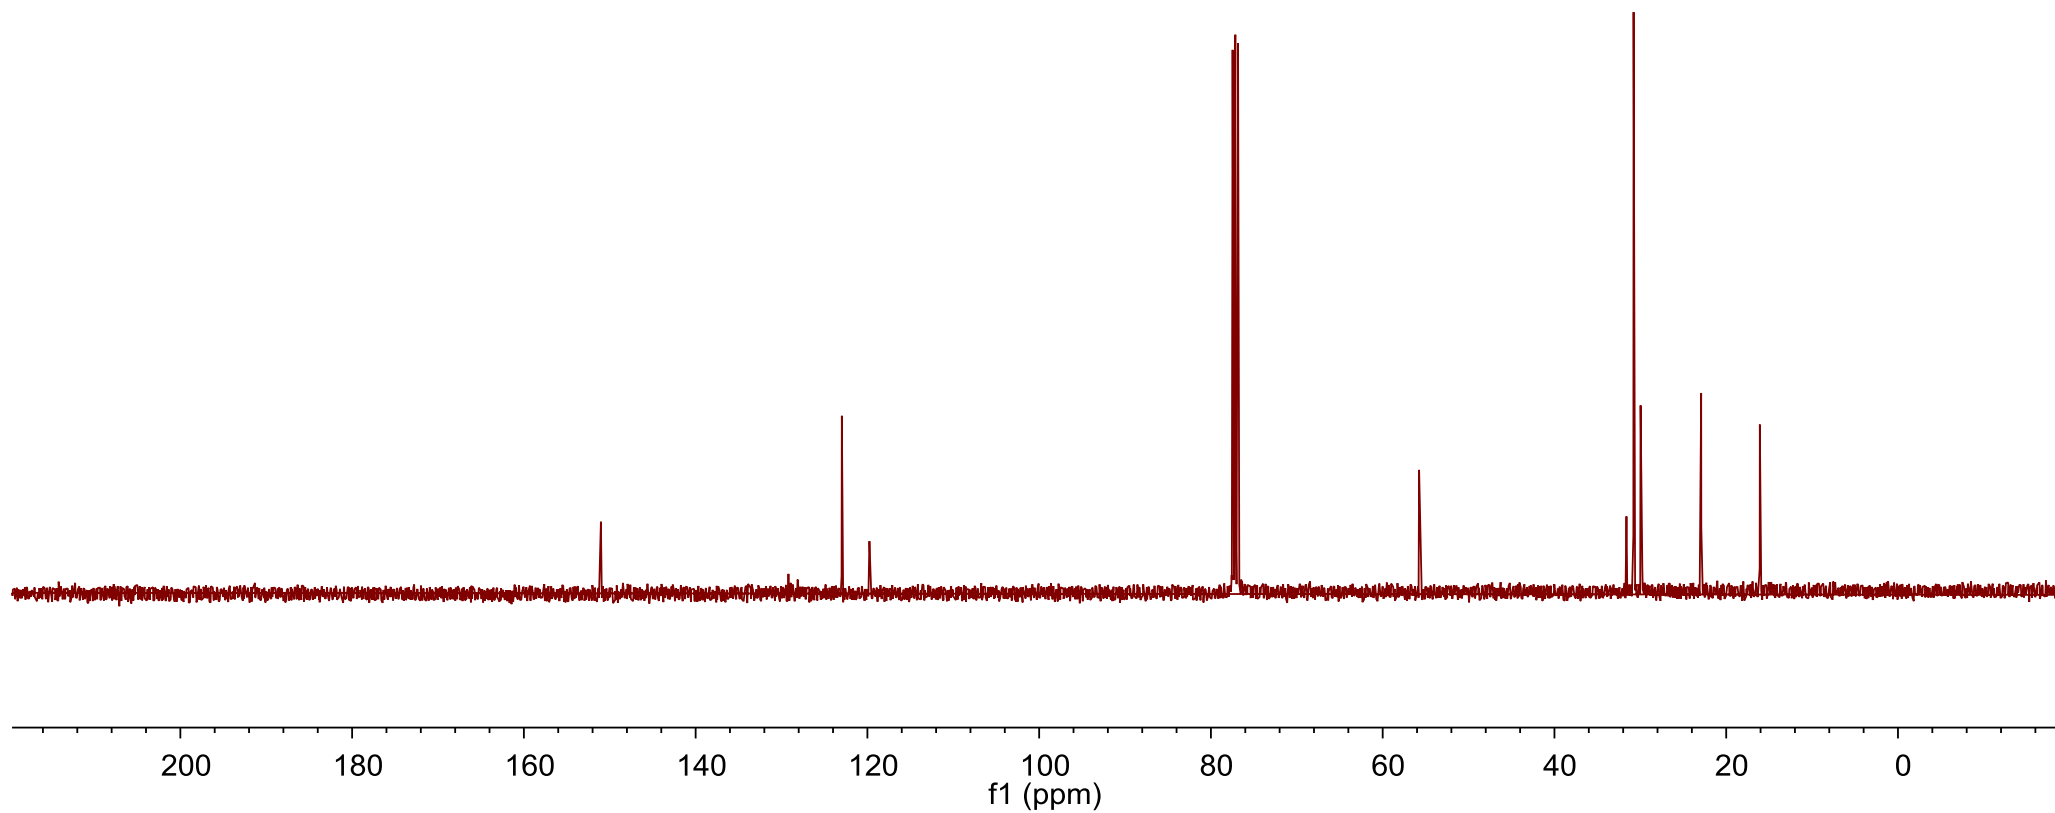

<sup>13</sup>C NMR Spectrum of **14f**

CDCl<sub>3</sub>, 400.13 MHz

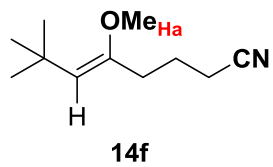

— 3.47

Ha

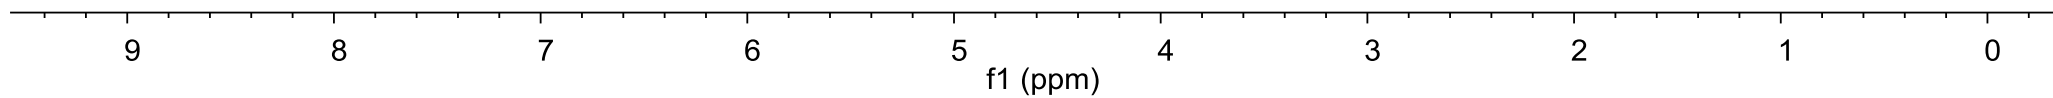

1D-NOE Spectrum of **14f**

CDCl<sub>3</sub>, 400.13 MHz

4.11  
4.09

3.62

0.00

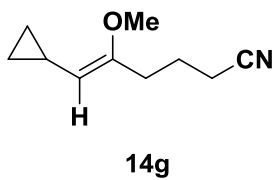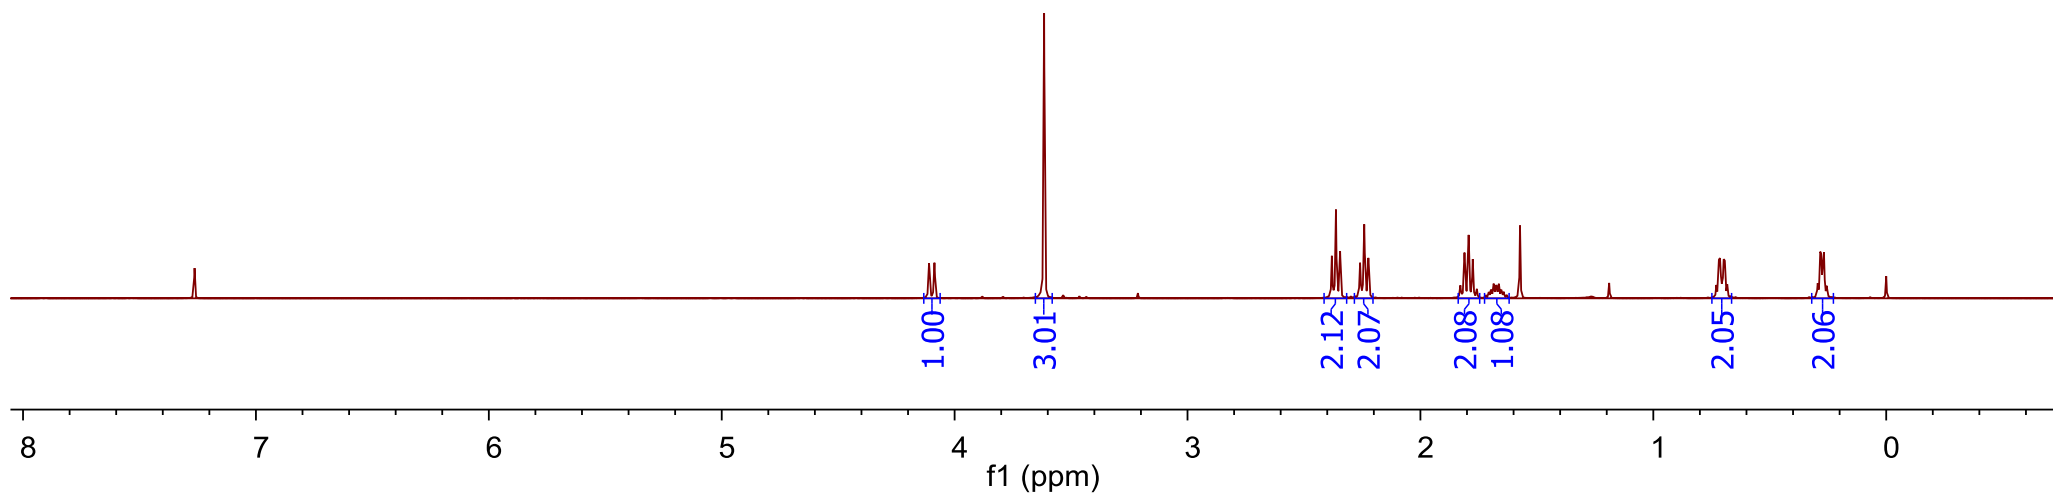

<sup>1</sup>H NMR Spectrum of 14g



CDCl<sub>3</sub>, 100.61 MHz

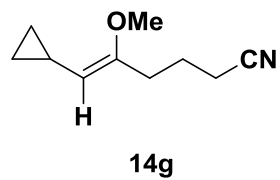

— 152.68

~ 119.71  
~ 116.87

— 57.33

~ 30.51  
~ 22.97  
~ 16.36  
~ 7.68  
~ 6.86

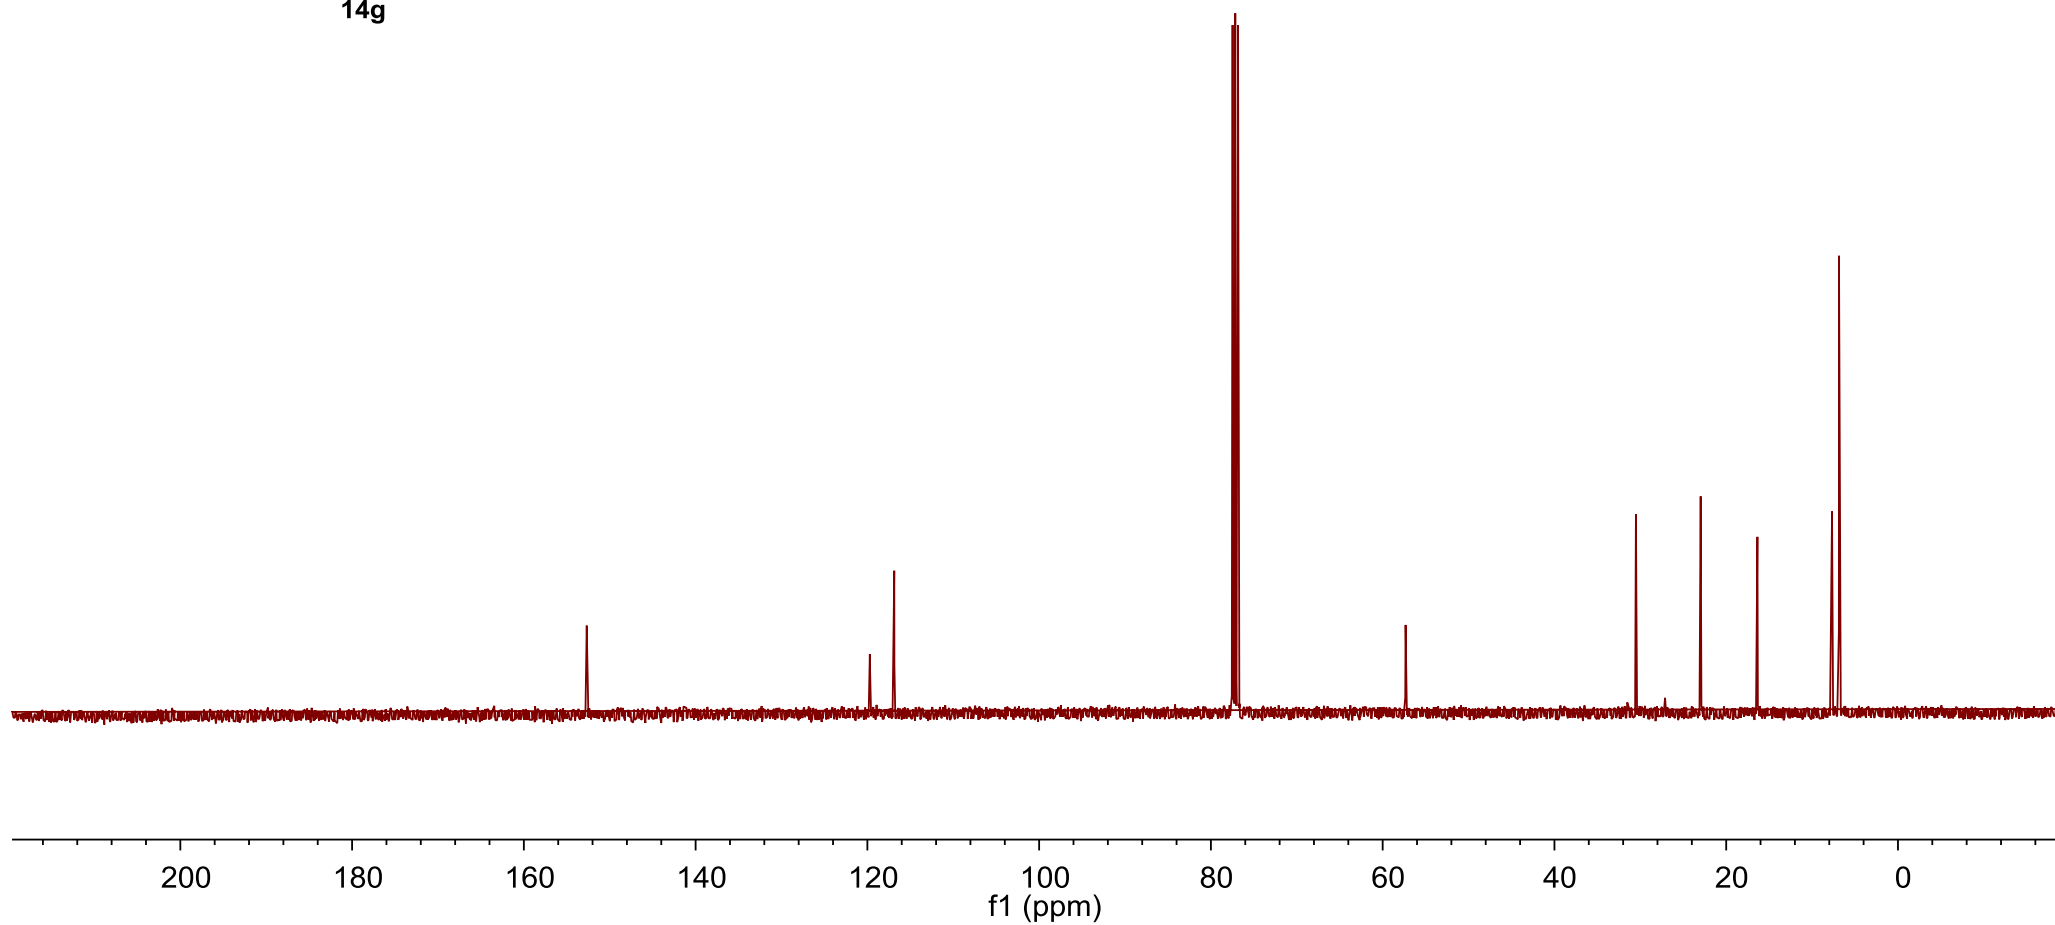

<sup>13</sup>C NMR Spectrum of **14g**

CDCl<sub>3</sub>, 400.13 MHz

4.11  
4.09

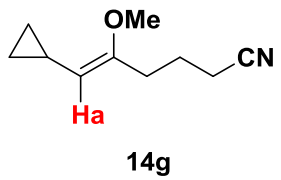

Ha

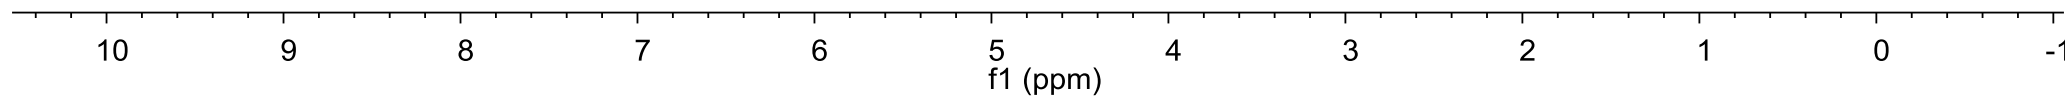

1D-NOE Spectrum of **14g**

CDCl<sub>3</sub>, 400.13 MHz

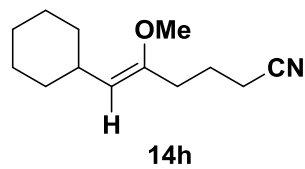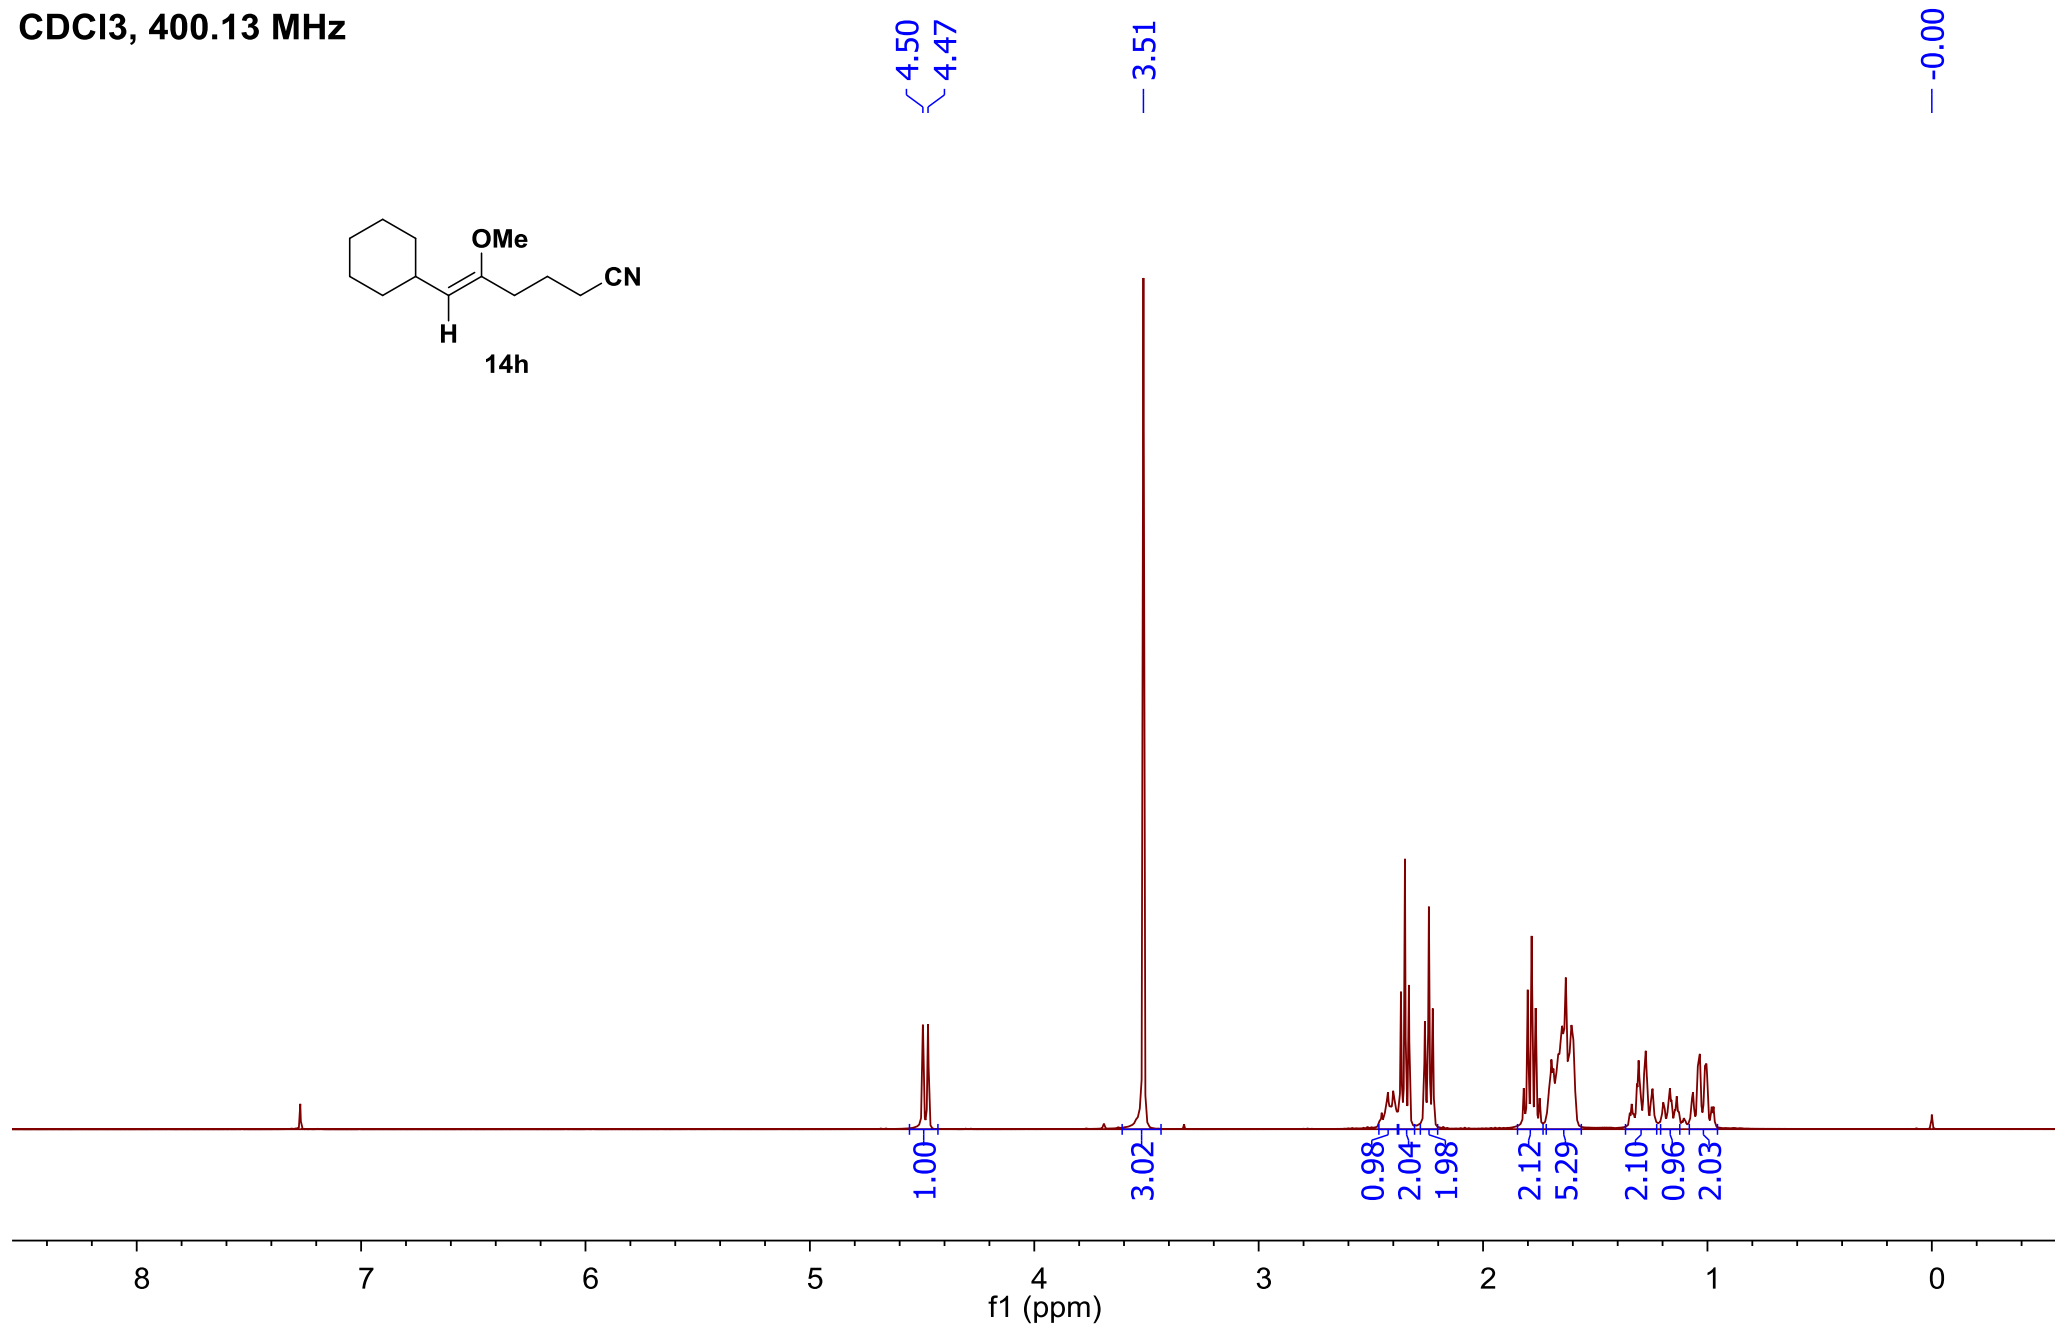

<sup>1</sup>H NMR Spectrum of **14h**

CDCl<sub>3</sub>, 100.61 MHz

— 150.93

119.70  
119.55

— 57.11

34.28  
33.78  
30.03  
26.20  
26.10  
22.87  
16.17

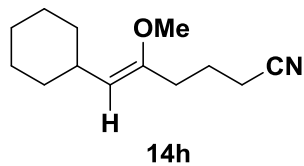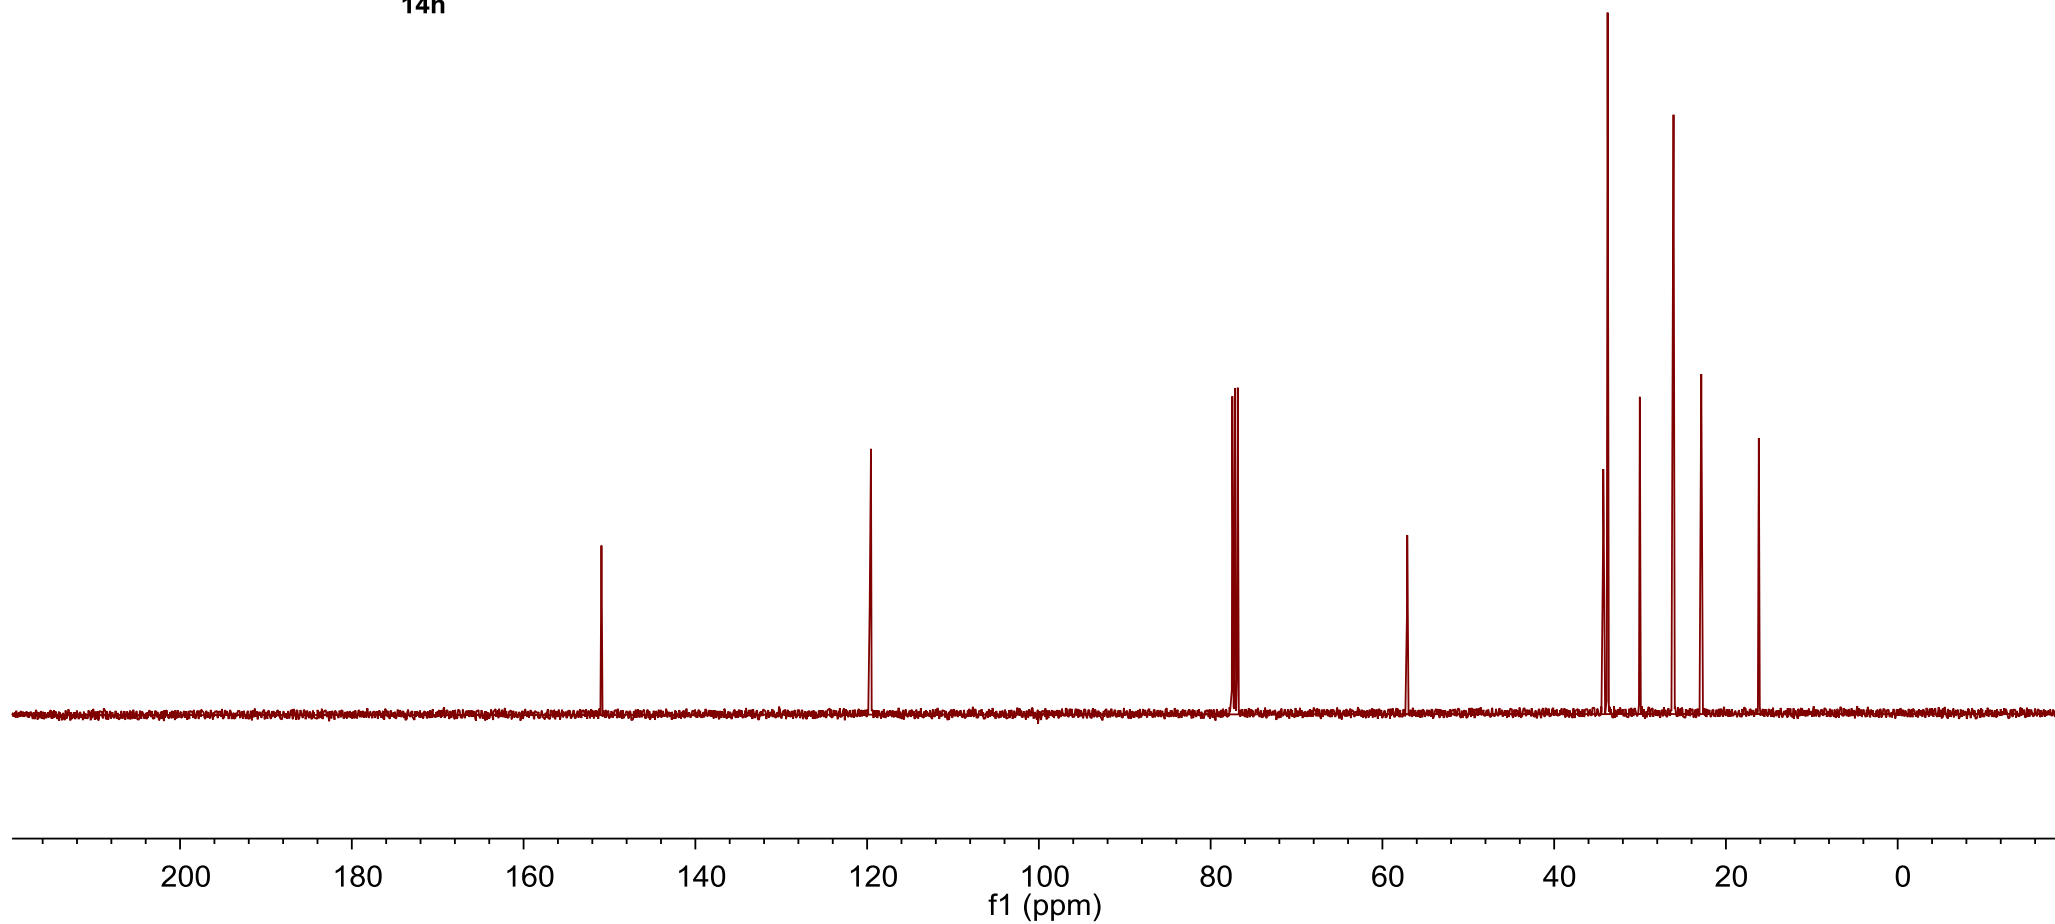

<sup>13</sup>C NMR Spectrum of **14h**

CDCl<sub>3</sub>, 400.13 MHz

4.50  
4.47

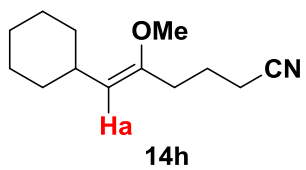

Ha

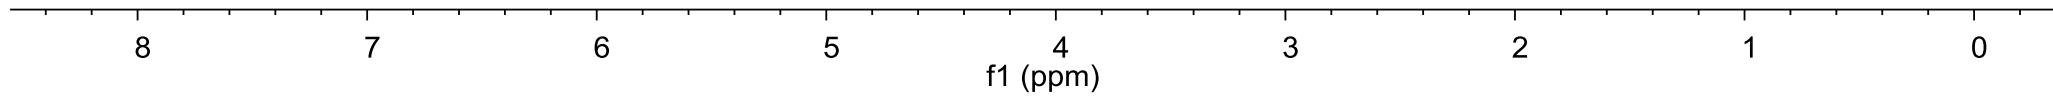

1D-NOE Spectrum of **14h**

CDCl<sub>3</sub>, 400.13 MHz

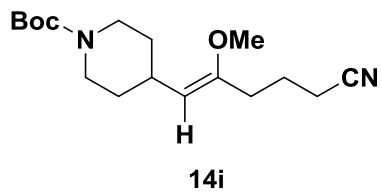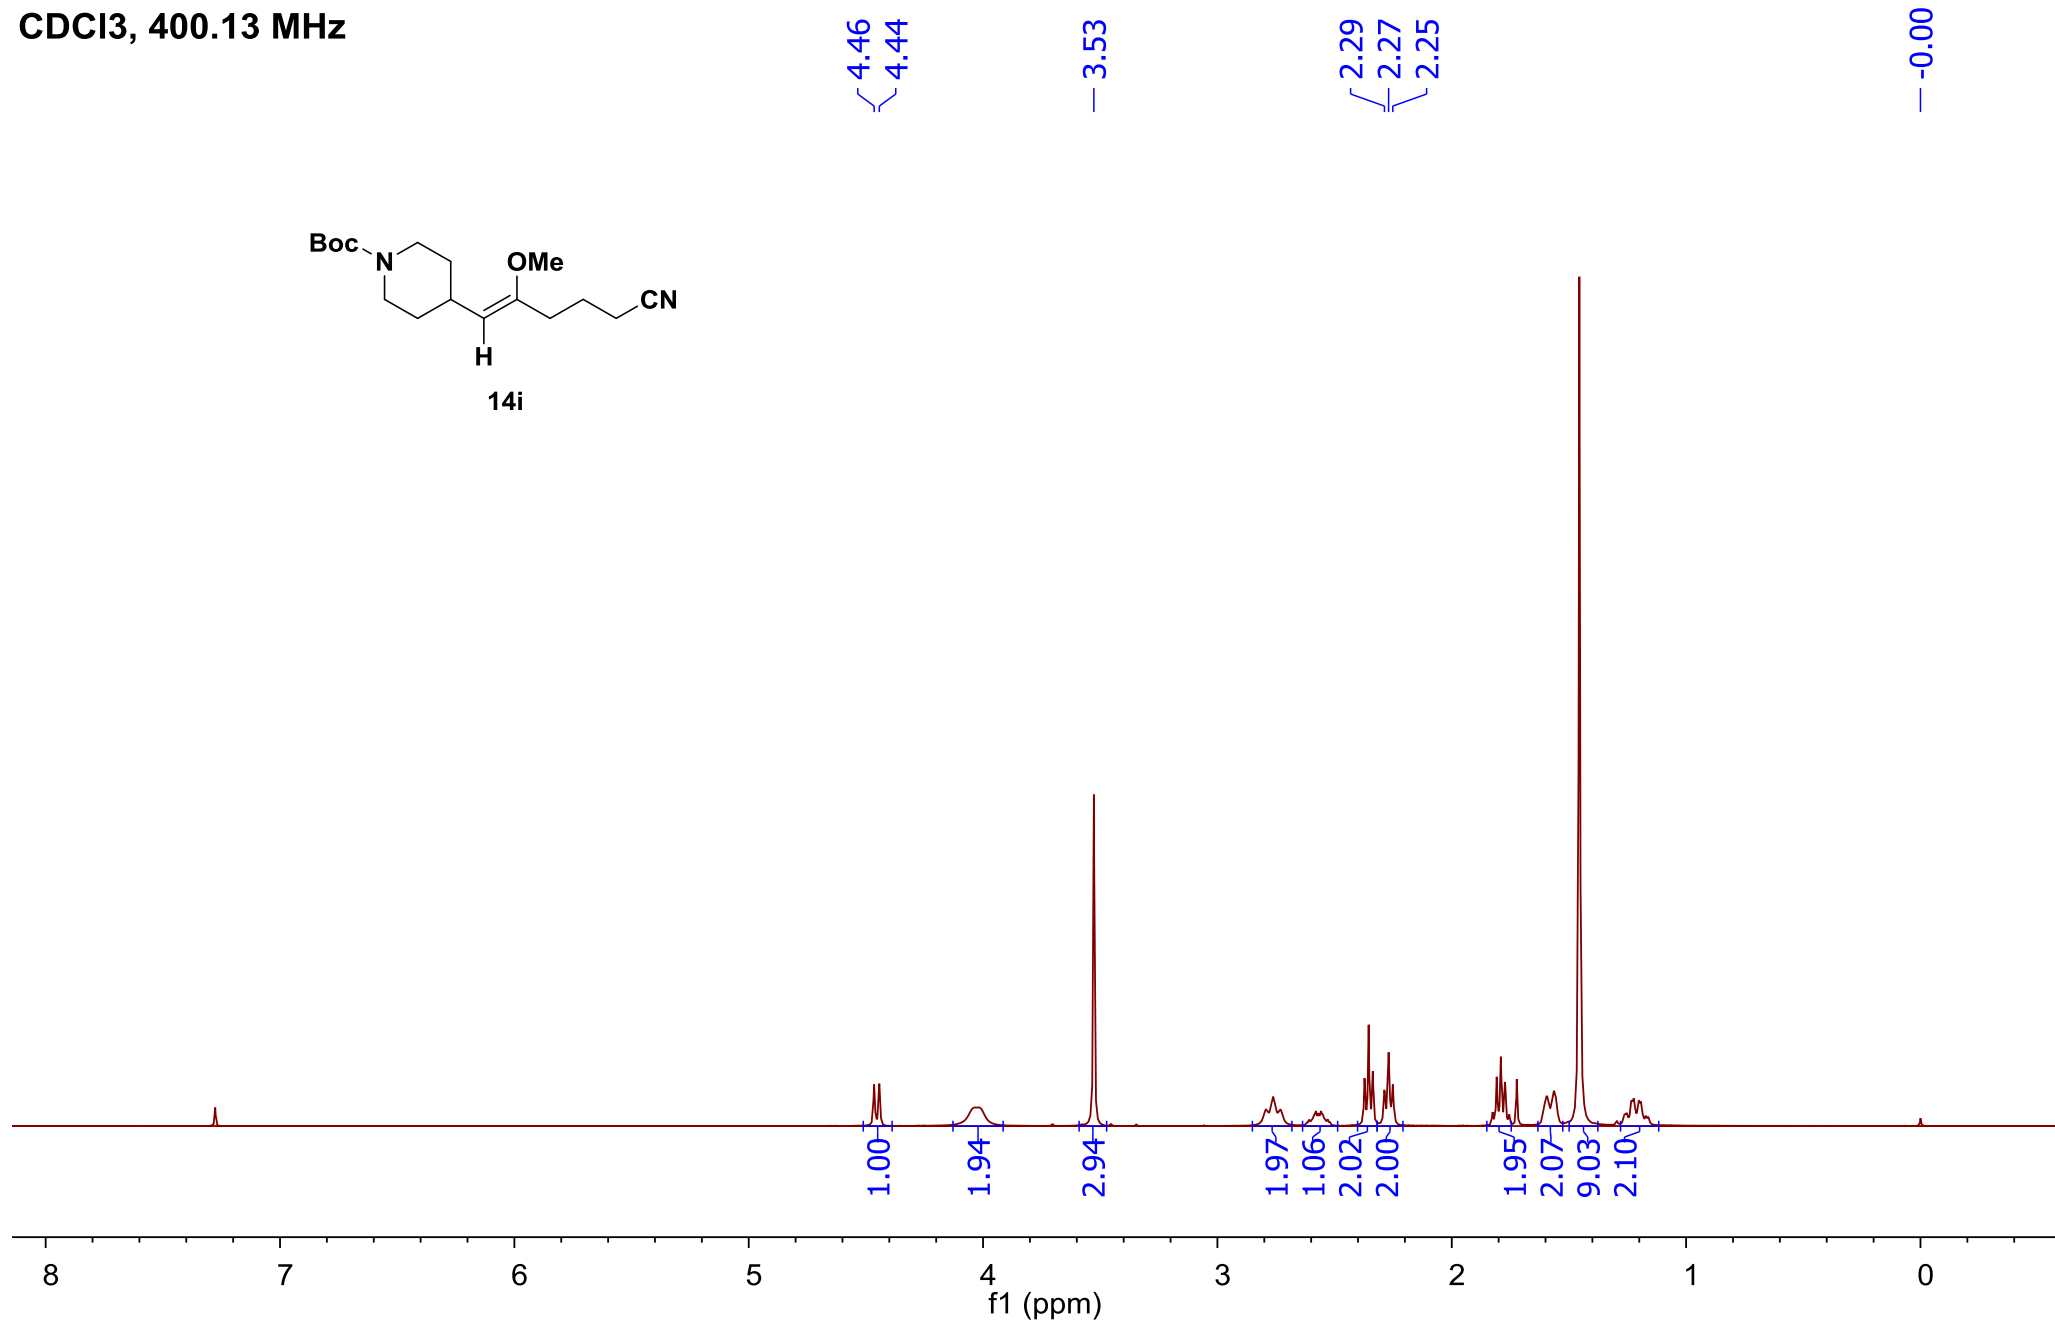

<sup>1</sup>H NMR Spectrum of **14i**

CDCl<sub>3</sub>, 100.61 MHz

~ 154.99  
~ 152.13

~ 119.54  
~ 116.82

— 79.34

— 56.78

— 43.84

~ 32.46  
~ 29.77  
~ 28.58  
~ 22.83  
~ 16.24

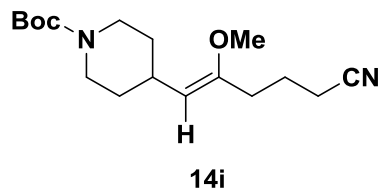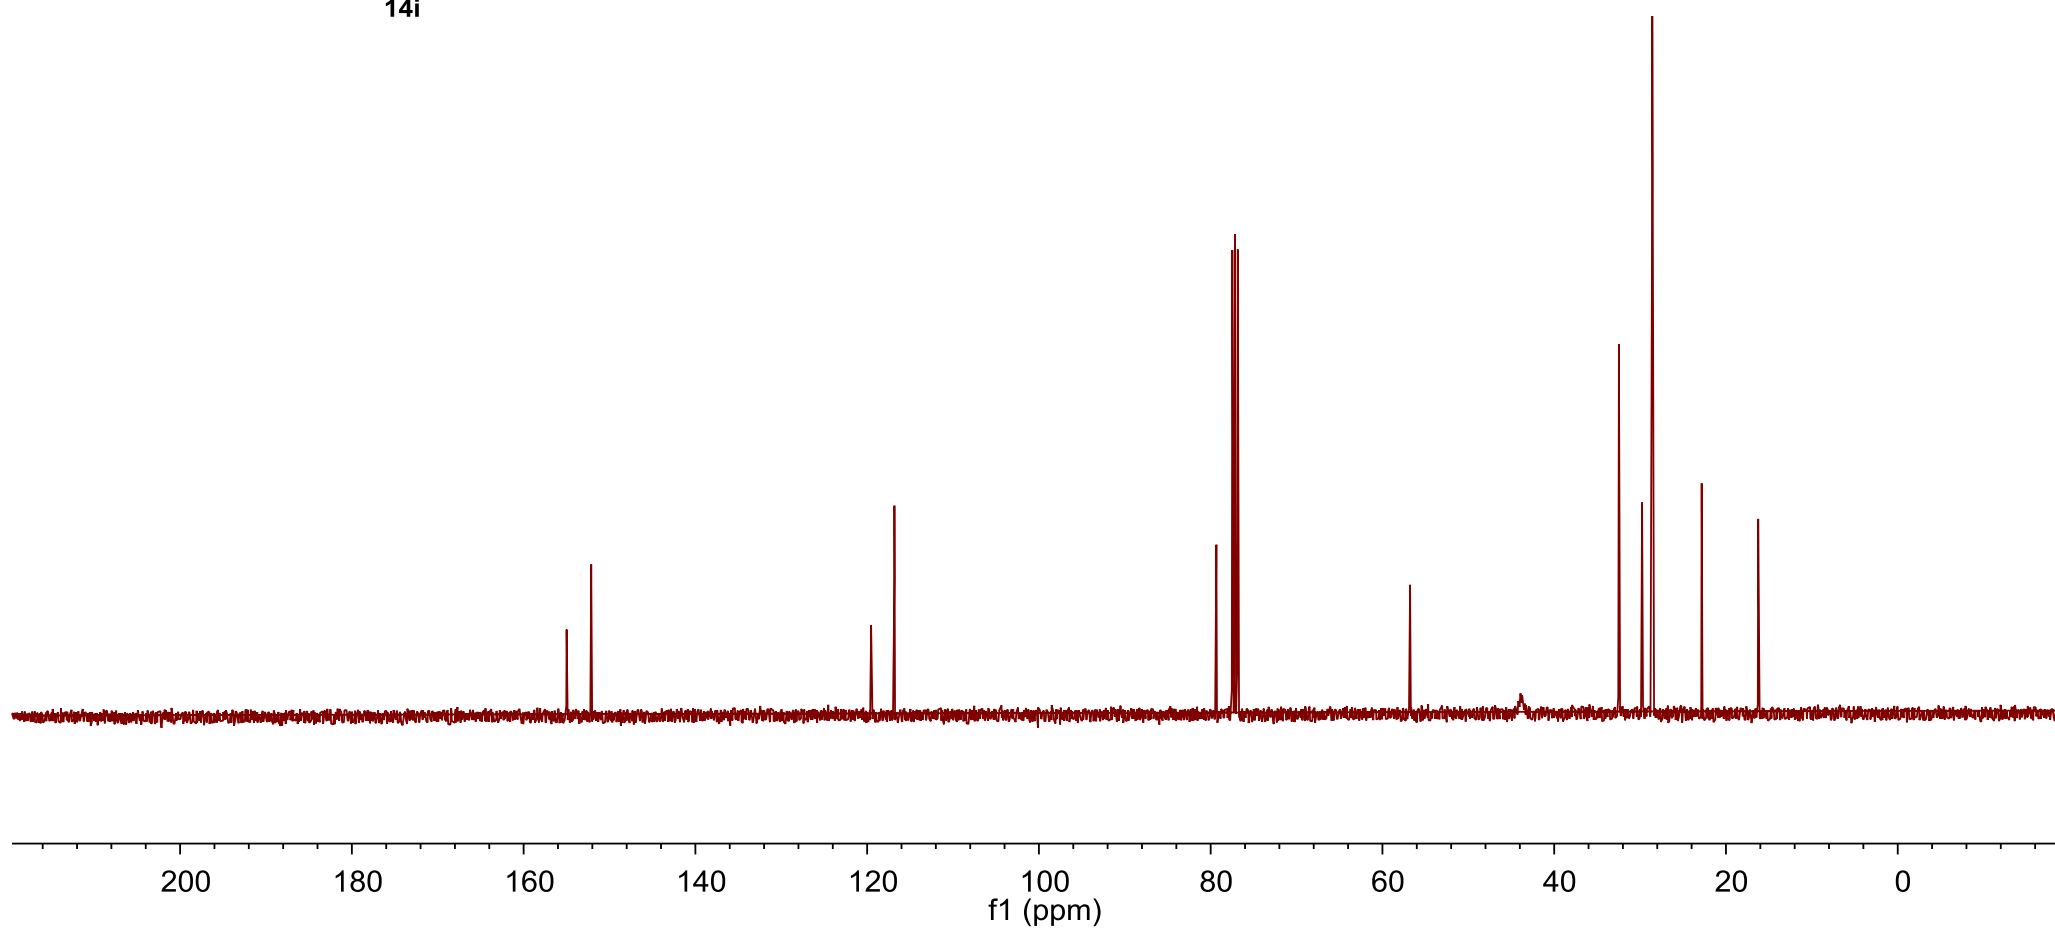

<sup>13</sup>C NMR Spectrum of **14i**

CDCl<sub>3</sub>, 400.13 MHz

4.47  
4.44

2.27

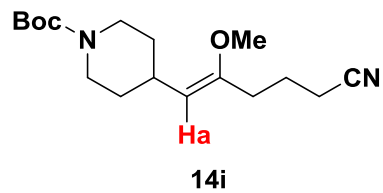

Ha

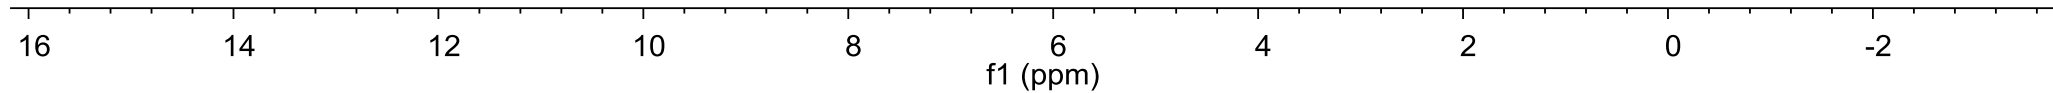

1D-NOE Spectrum of **14i**



CDCl<sub>3</sub>, 400.13 MHz

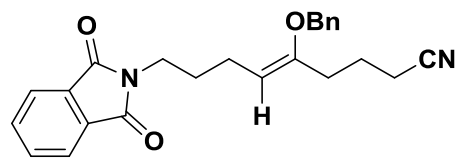

**14j**

4.73  
4.72  
4.69

2.39  
2.37  
2.36  
2.32  
2.31  
2.29

0.00

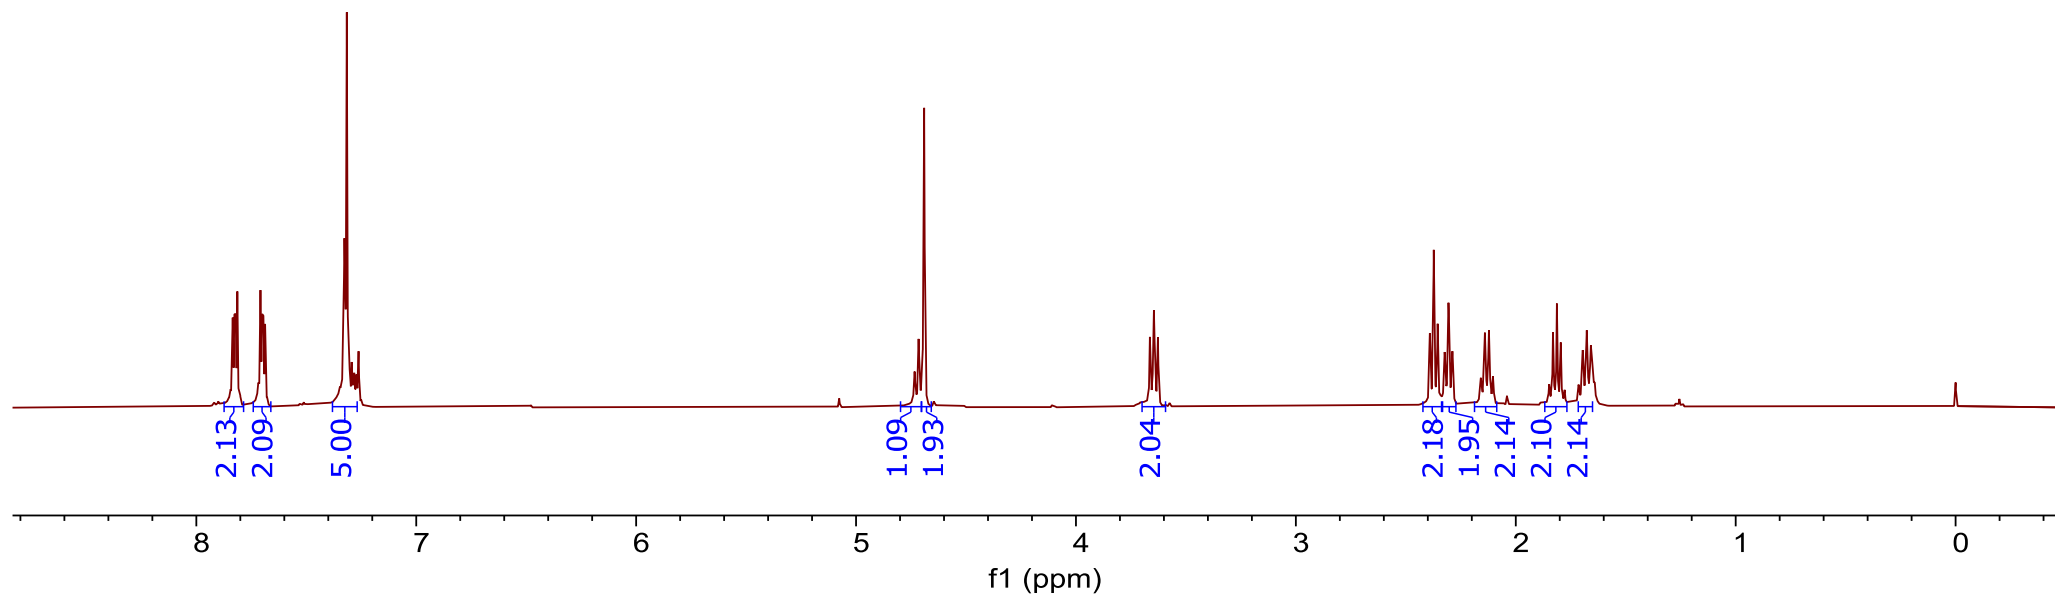

<sup>1</sup>H NMR Spectrum of **14j**

CDCl<sub>3</sub>, 100.61 MHz

— 168.47

— 152.23

— 137.55

— 133.96

— 132.29

— 128.59

— 128.05

— 127.82

— 123.25

— 119.68

— 112.57

— 70.97

— 37.75

— 30.65

— 28.60

— 22.93

— 22.52

— 16.31

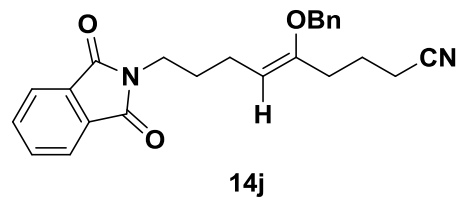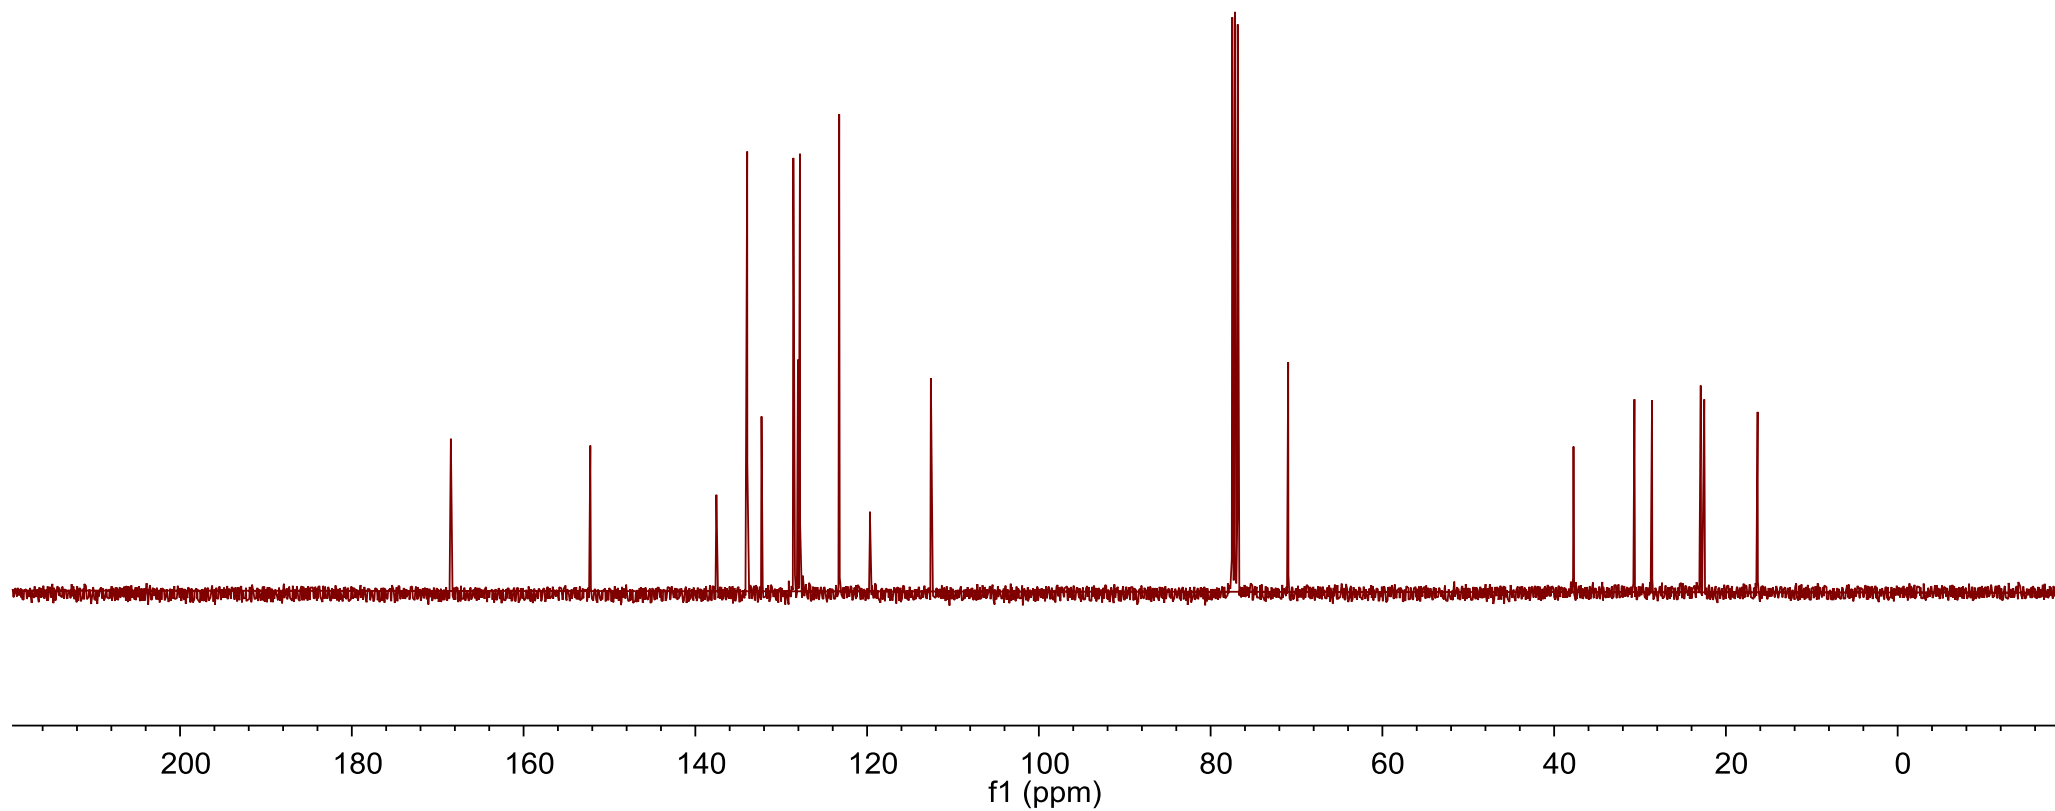

<sup>13</sup>C NMR Spectrum of 14j

CDCl<sub>3</sub>, 400.13 MHz

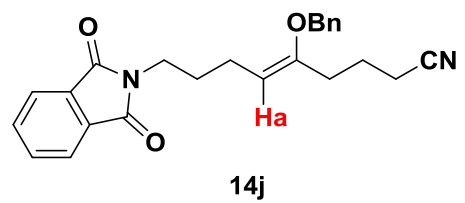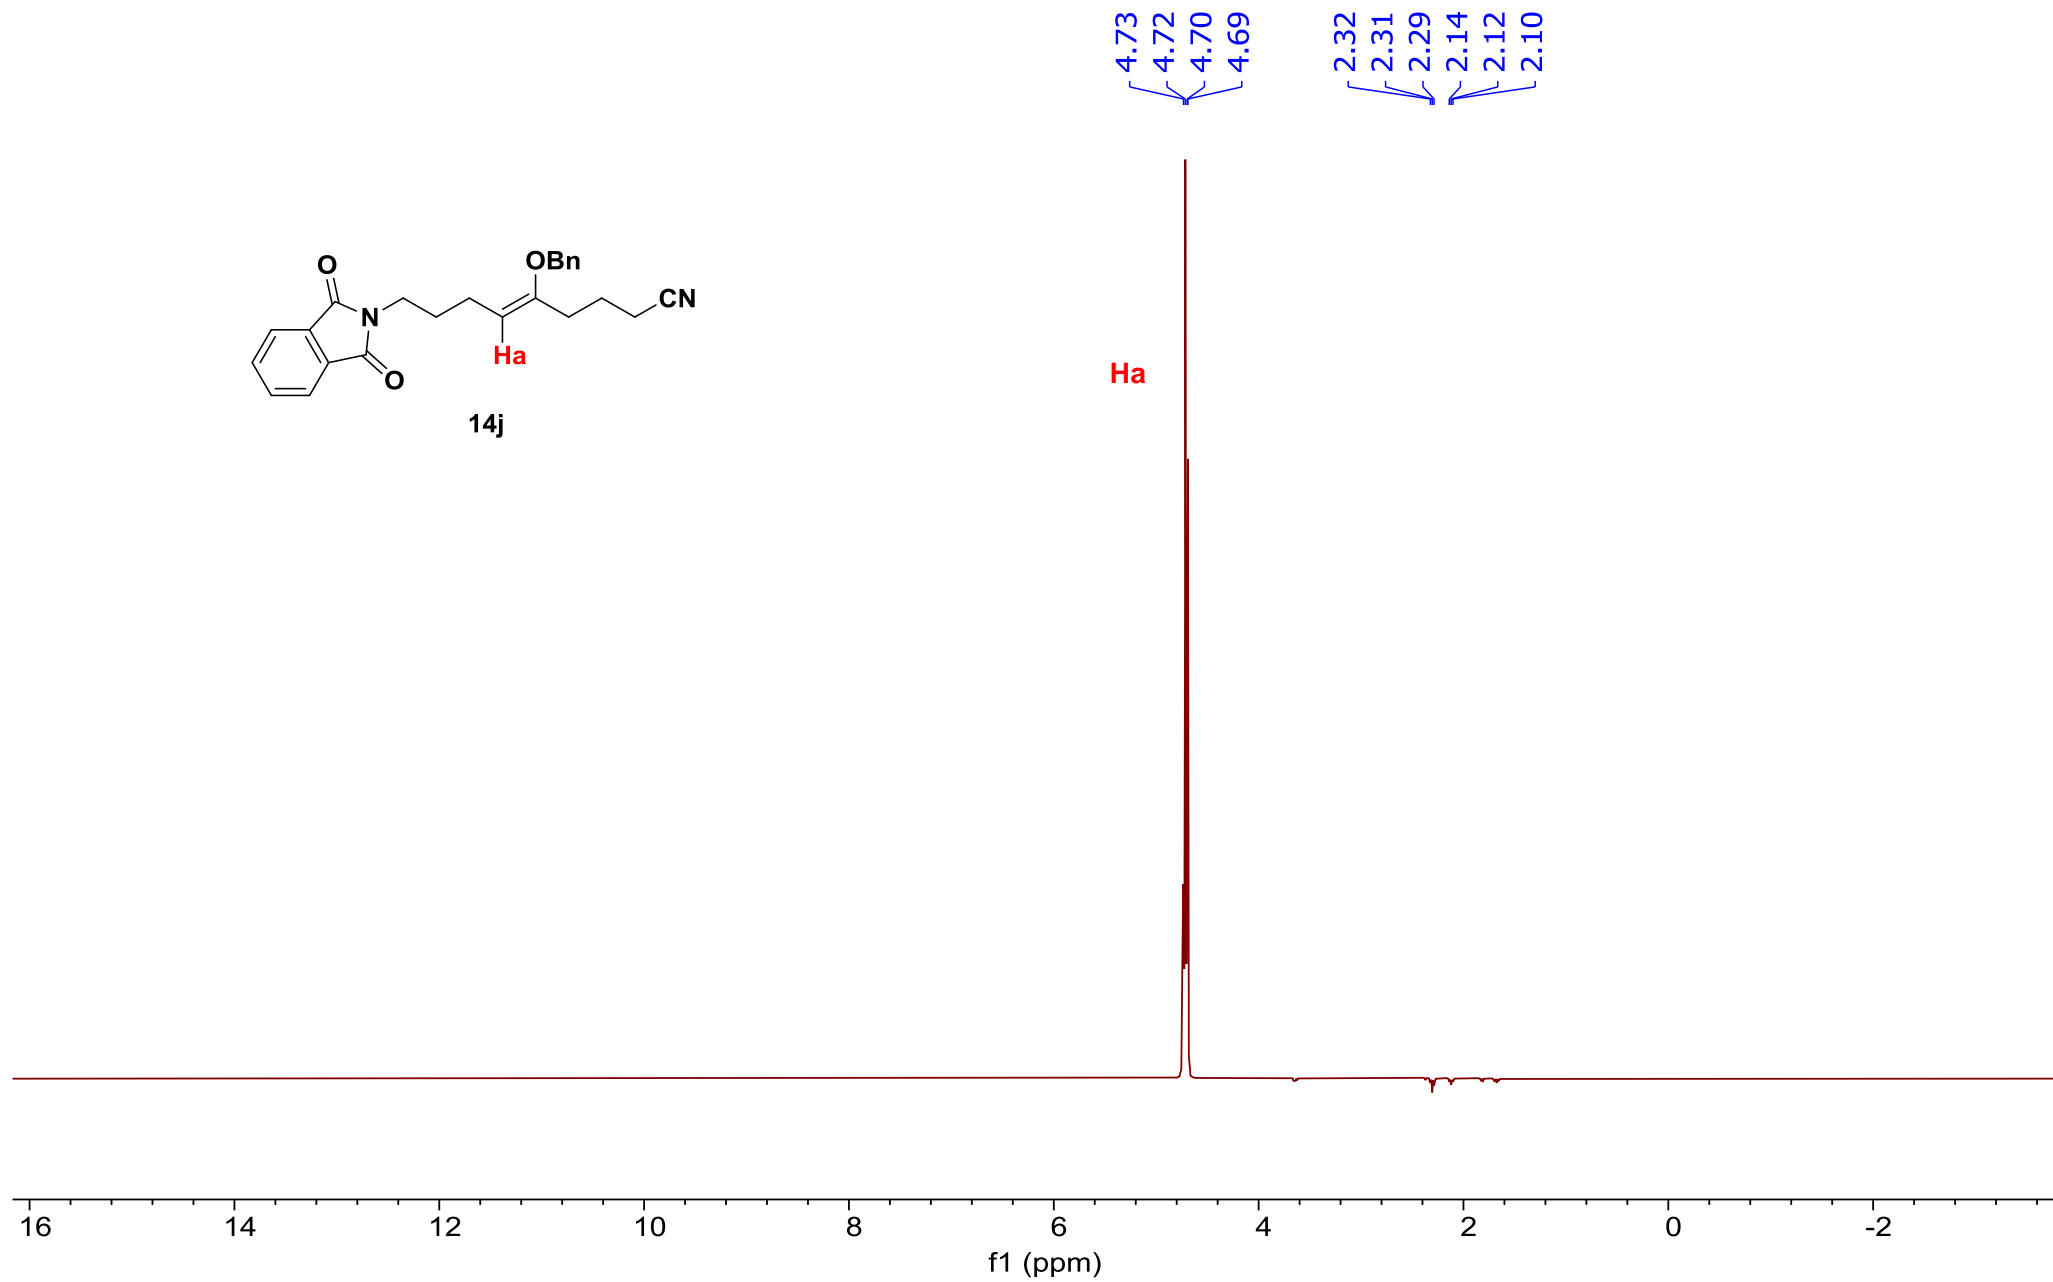

1D-NOE Spectrum of **14j**
